# Supplementary material for: Phenotypically Anchored mRNA and miRNA Expression Profiling in Zebrafish Reveals Flame Retardant Chemical Toxicity Networks
Source: Front Cell Dev Biol. 2021 Apr 9;9:663032. doi: 10.3389/fcell.2021.663032 (PMC8063052; doi:10.3389/fcell.2021.663032)
Supplement: Supplementary file 1 [file Table_1.XLSX]

## Sheet: Table S1.1- LEL hit table
chemical.id	chemical.name		any.except.MORT	any.effect	MO24	DP24	SM24	NC24	MORT	YSE_	AXIS	EYE_	SNOU	JAW_	OTIC	PE__	BRAI	SOMI	PFIN	CFIN	PIG_	CIRC	TRUN	SWIM	NC__	TR__	B	E	R	LEL.dark	LEL.light
C42471	2_2__4_4_-tetra-_bromodiphenyl_ether_	BDE-47	NA	NA	NA	NA	NA	NA	NA	NA	NA	NA	NA	NA	NA	NA	NA	NA	NA	NA	NA	NA	NA	NA	NA	NA	NA	NA	NA	1	0.5
C13638	Bis(2-ethylhexyl) tetrabromophthalate	TBPH	NA	80	80	NA	NA	NA	80	NA	NA	NA	NA	NA	NA	NA	NA	NA	NA	NA	NA	NA	NA	NA	NA	NA	NA	NA	NA	NA	59.8
C23855	Isopropylated_triphenyl_phosphate_[IPP-1]	IPP	25	25	NA	25	NA	NA	25	25	25	25	25	25	NA	25	25	25	25	25	NA	NA	NA	NA	NA	25	25	5	NA	0.5	0.5
C13497	Tetrabromobisphenol A	TBBPA	NA	5	25	NA	NA	NA	5	NA	5	NA	NA	NA	NA	NA	NA	5	NA	5	NA	NA	5	NA	NA	NA	5	5	NA	NA	NA
C93901	Tetrabromobisphenol_A-2-3-dibromopropyl_ether_	TBBPA-DBPE	NA	NA	NA	NA	NA	NA	NA	NA	NA	NA	NA	NA	NA	NA	NA	NA	NA	NA	NA	NA	NA	NA	NA	NA	NA	NA	NA	NA	0.1
C48008	Triisobutyl phosphate	TiBP	NA	0.1	NA	NA	NA	NA	0.1	NA	NA	NA	NA	NA	NA	NA	NA	NA	NA	NA	NA	NA	NA	NA	NA	NA	NA	NA	NA	NA	NA
C64688	Triphenyl phosphate (TPHP)	TPP	5	25	80	25	NA	NA	DPP	5	NA	NA	NA	NA	NA	NA	NA	NA	NA	5	NA	NA	5	1	NA	NA	25	5	NA	NA	NA
C98689	Tris(2-chloroethyl) phosphate	TCEP	NA	NA	NA	NA	NA	NA	NA	NA	NA	NA	NA	NA	NA	NA	NA	NA	NA	NA	NA	NA	NA	NA	NA	NA	NA	NA	NA	NA	NA
C16631	Tris(2-chloroisopropyl)phosphate	TCPP	NA	NA	NA	NA	NA	NA	NA	NA	NA	NA	NA	NA	NA	NA	NA	NA	NA	NA	NA	NA	NA	NA	NA	NA	NA	NA	NA	NA	NA
C47329	Tris(2_3-dibromopropyl) phosphate	TDBPP	5	5	25	5	NA	NA	5	5	5	5	5	5	NA	5	NA	NA	NA	NA	NA	NA	NA	NA	NA	NA	25	25	NA	33.4	33.4
Time of observation (hpf)					24	24	24	24	120	120	120	120	120	120	120	120	120	120	120	120	120	120	120	120	120	120	24	24	24	120	120
Description					Mortality	Delayed progression	Sponteneous movement	notochord	Mortality	Yolk Sac edema	Axis	Eye development	Snout	Jaw_	Otic vescicle	Pericardial edema	Brain	Somites	Pectoral fin	Caudal fin	Pigment	Circulation	Trunk	Swim bladder	Notochord	touch response	Embryo photomor response (EPR)-background	Embryo photomor response (EPR)-excitatory	Embryo photomor response (EPR)-refractory	Larval photomotor response-dark	Larval photomotor response-light

## Sheet: Table S1.2-mRNA exp
Ensembl Gene ID-zfish	Symbol-zfish	BDE47	IPP	TBBPA	TBBPA_DBPE	TBPH	TCEP	TCPP	TDBPP	TiBP	TPP	Ensembl Gene ID- Human	Symbol-Human
ENSDARG00000012499	per1b						1.50957					ENSG00000179094	PER1
ENSDARG00000036626	sema6ba	4.08028	3.71044		3.89176	3.22918	4.18775	3.37112	3.45113	3.97617	3.55804	ENSG00000167680	SEMA6B
ENSDARG00000079741	CABZ01075131.1	4.09124	3.62199	2.02304	3.63543	3.30234	3.98326	3.9786	3.48311	4.08443	3.53427	ENSG00000178662	CSRNP3
ENSDARG00000025108	magixa	3.34299	2.85294	2.18808	2.74921	2.52933	2.90592	2.75549	2.37706	3.27124	2.44419
ENSDARG00000032990	plxnb3	2.34478	2.00417		2.10398		2.09031	1.73369	1.70518	2.33021	1.91889	ENSG00000198753	PLXNB3
ENSDARG00000042518	hipk2	2.88574	2.68101	1.60461	2.50658		2.81863	2.09664	2.44044	2.91159	2.38016
ENSDARG00000043627	ENSDARG00000043627	2.41838	2.60186	1.50535	2.37588	2.02239	2.43552	2.12553	2.59985	3.22684	2.25173	ENSG00000197226	TBC1D9B
ENSDARG00000053454	cntn3b	3.27959	1.86695		2.39014		2.85404	2.33295	2.19358	2.97365	2.32806	ENSG00000113805	CNTN3
ENSDARG00000062696	dgkg	3.47803	2.56812	2.23423	3.33749	2.78473	3.3345	2.75419	2.84519	3.50734	2.98414	ENSG00000058866	DGKG
ENSDARG00000070721	vdrb	4.07886	4.67439	2.92034	3.98675		4.29262	3.97074	4.50259	4.90205	3.48609	ENSG00000111424	VDR
ENSDARG00000002816	rasgrf2b	3.53947	2.92262	-1.73386	2.9932		3.36206	3.18529	3.0092	3.52693	2.35171	ENSG00000113319	RASGRF2
ENSDARG00000018896	mmp24	2.4737	2.06372		2.43552		2.46552	2.12212		2.33069	2.15521	ENSG00000125966	MMP24
ENSDARG00000053771	apbb3	2.19325	1.75423		2.34497	1.88766	2.42213	2.0302		2.12215	1.78957	ENSG00000113108	APBB3
ENSDARG00000054253	sobpa	2.72299	2.16946		2.35799		2.86269	1.9927	1.94803	2.5005	1.84051	ENSG00000112320	SOBP
ENSDARG00000053804	osbpl2a	2.78217	2.51966	1.71944	2.74027	2.44785	2.61053	2.65115	2.94266	3.16169	2.56921	ENSG00000130703	OSBPL2
ENSDARG00000016788	zeb1a	2.14492	1.86168		1.89092		2.09443	1.86083	1.87686	2.36491	1.70312	ENSG00000148516	ZEB1
ENSDARG00000042114	bin1a	3.20994	2.58931		2.72186		3.05631	2.89496	2.22875	3.34163	2.29866	ENSG00000136717	BIN1
ENSDARG00000086224	FAM155A	3.35885	2.9655	2.07248	3.2076	2.94363	3.53319	3.5664	2.69643	3.3821	2.44221
ENSDARG00000017365	slc23a2	2.89257	3.06951		2.93889		2.68144	2.81248	3.03228	3.85909	2.50962	ENSG00000089057	SLC23A2
ENSDARG00000060309	srgap3	3.30222	3.29669	1.87581	3.38666		3.54685	2.81625	2.72715	3.76202	2.84841	ENSG00000196220	SRGAP3
ENSDARG00000042492	si:dkey-250d21.1	4.82821	4.32517	2.92205	4.52251	4.37166	4.72098	4.49141	5.21546	4.94306	4.04661
ENSDARG00000103056	itga4	1.92718	1.61245			1.65126		1.70214	1.77219	1.99256		ENSG00000115232	ITGA4
ENSDARG00000017785	zgc:158689	2.29402	1.73196		2.00065		1.89072	2.02066	1.92502	2.3503	1.68568
ENSDARG00000036826	ankrd52a	3.15661	2.61985	2.05173	3.08144		3.3153	2.61958	2.79712	3.2486	2.64812	ENSG00000139645	ANKRD52
ENSDARG00000074905	camk1da	2.30601	1.59755		2.0022		2.13066	1.64263	1.65992	2.04027		ENSG00000183049	CAMK1D
ENSDARG00000099199	itchb	2.32879	2.56437		2.36625		2.40043	1.78684	2.65193	2.8145	2.29683	ENSG00000078747	ITCH
ENSDARG00000015252	st3gal3b			-2.80317								ENSG00000126091	ST3GAL3
ENSDARG00000060081	crb2b	2.13649	1.94283		1.62996		1.97213	1.66476	2.03281	2.49097	1.59318	ENSG00000148204	CRB2
ENSDARG00000061268	ago2	2.37228	2.35826	1.87001	2.4309	2.15014	2.10685	2.1447	2.64088	2.92838	2.2047	ENSG00000123908	AGO2
ENSDARG00000063361	si:ch211-1e14.1	2.90379	2.26902		2.83358		2.52615	2.45518	2.32879	2.81594	2.45767	ENSG00000122778	KIAA1549
ENSDARG00000074644	spock1	3.84656	2.96277	2.513	3.28844		3.50287	3.1989	2.99128	3.71952	2.81818	ENSG00000152377	SPOCK1
ENSDARG00000077715	GRIK3	2.33031	1.76291		1.63693		1.65171	1.84565	2.05632	1.84738	1.66951	ENSG00000163873	GRIK3
ENSDARG00000018393	kank2	2.32122	2.02245		2.10103		2.3675	2.19936	2.24377	2.51059	1.90235	ENSG00000197256	KANK2
ENSDARG00000036999	DISP3	1.94139					1.67469	1.84932				ENSG00000204624	DISP3
ENSDARG00000005783	ncanb	2.7504	2.46146		2.39035		2.58789	2.05509	1.64813	2.67307	1.93825	ENSG00000130287	NCAN
ENSDARG00000060372	plxna2	2.65607	1.96251		2.06492		2.31196	2.25241	1.58822	2.3749	1.77789	ENSG00000076356	PLXNA2
ENSDARG00000101019	ext1b	3.76462	3.33662	2.80145	3.46096		3.91782	3.46471	3.85622	3.98015	3.0992	ENSG00000182197	EXT1
ENSDARG00000007787	zgc:112965	2.35081	1.89577		1.78736				2.17204	1.63955
ENSDARG00000008372	spred2b	1.51559					1.52317		1.49243	1.65577		ENSG00000198369	SPRED2
ENSDARG00000008398	cacna1c	2.89604	2.47971		2.52947		2.88028	2.21807	2.26399	2.83807	2.11191	ENSG00000151067	CACNA1C
ENSDARG00000011703	clocka	1.87652			1.76981		1.89571	1.5685		1.76625	1.55947	ENSG00000134852	CLOCK
ENSDARG00000017591	fat1a							3.259				ENSG00000083857	FAT1
ENSDARG00000020057	bmpr2b	2.49562	1.69174		2.01831		2.14583	2.08072	1.79631	2.25454	1.87709	ENSG00000204217	BMPR2
ENSDARG00000027497	mast1a	2.98588	2.35615	1.99447	2.76431		2.87492	2.32743	2.13319	2.51971	2.17293	ENSG00000105613	MAST1
ENSDARG00000030896	foxq1a		-1.71041						-1.92154	-1.87484		ENSG00000164379	FOXQ1
ENSDARG00000043646	slc6a8	3.10548	3.15787		2.96366		3.31987	2.50002	3.60468	3.24316	2.74032	ENSG00000130821	SLC6A8
ENSDARG00000058702	vax2	3.5682			2.64299		2.22503		2.75997	3.02955		ENSG00000116035	VAX2
ENSDARG00000061304	ppp1r9a	2.9973	2.46341		3.28032		3.35403	2.67408	2.4959	2.96358	2.70289	ENSG00000158528	PPP1R9A
ENSDARG00000062687	kcnh7	2.08399			1.62078		1.73909	1.97173		1.73707
ENSDARG00000070461	zgc:154061											ENSG00000186073	C15orf41
ENSDARG00000071524	insrb									1.60026		ENSG00000171105	INSR
ENSDARG00000073743	slc25a37	3.48055	3.50513	2.60221	3.49214		3.45438	3.22363	3.81357	4.04682	3.47532	ENSG00000147454	SLC25A37
ENSDARG00000075230	tet1	3.20739	2.95731	2.3189	3.0132		3.1995	2.98379	2.89987	3.49517	2.73314	ENSG00000138336	TET1
ENSDARG00000076546	trhra	3.91728	4.09224	2.85673	3.73226		3.28762	3.83551	4.74889	4.99109	3.65004	ENSG00000174417	TRHR
ENSDARG00000086931	CABZ01029822.1	2.17314					1.89533	1.76407	1.74452	2.32379
ENSDARG00000089691	ism2a	2.21104	1.76813		2.19797		2.37141	2.05006	2.16825	2.56909	1.68346	ENSG00000100593	ISM2
ENSDARG00000102589	rsf1a	3.37886	3.13291	2.2918	3.31494		3.53726	3.30044	3.14152	3.70046	2.65073
ENSDARG00000104483	gipc1	2.25668	1.63324		1.7613		2.20828	2.17818	1.89733	2.30245		ENSG00000123159	GIPC1
ENSDARG00000106418	CABZ01066921.1	2.94315	2.18201		2.79252		2.98975	2.43693	1.79436	2.78209	2.29218
ENSDARG00000013072	mmp15b	1.9975	1.57904		1.65661		1.98249	1.68469	1.90365	2.30187		ENSG00000102996	MMP15
ENSDARG00000016667	gabbr1b	2.33229	1.97457		2.14625		2.13573	2.10158	1.67927	2.34684	2.00377	ENSG00000204681	GABBR1
ENSDARG00000091090	xirp2b	2.72239	2.4621		2.47461		3.02162	2.22434	3.16008	3.17256	2.82613	ENSG00000163092	XIRP2
ENSDARG00000003820	nr1d2a						1.54427
ENSDARG00000021787	abcb5
ENSDARG00000037383	pax5	3.04087	2.58531	2.00592			2.43552		2.45119	2.70932	2.03273	ENSG00000196092	PAX5
ENSDARG00000058771	nav1b	2.80329	2.39309		2.56714		3.14682	2.32603	2.41062	3.13356	2.40139	ENSG00000134369	NAV1
ENSDARG00000053326	gna11b	2.58545	2.43389		2.83532		3.02777	2.16214	2.53773	2.89276	2.2788
ENSDARG00000071445	myoz1b				-1.50641							ENSG00000177791	MYOZ1
ENSDARG00000089357	fam73b	1.61655			1.6259		1.68773	1.72058	1.82404	1.87366	1.53406	ENSG00000148343	MIGA2
ENSDARG00000091598	si:ch73-91k6.2	1.81416	2.01196		1.75225		1.78787	1.77794	2.30853	2.48486	1.88215
ENSDARG00000098857	lifra	3.51522	3.32671	1.99298	3.60581		3.49792	3.21731	3.46205	3.6521	2.72394	ENSG00000113594	LIFR
ENSDARG00000098903	tfe3a	3.12974	4.46019	2.27787	3.28523		3.51712	2.98075	3.76603	4.95086	2.96817	ENSG00000068323	TFE3
ENSDARG00000055154	slc8a4a	2.01068			1.75348		1.8785	1.66904		1.94976	1.78561
ENSDARG00000106631	CABZ01072393.1	2.76135	1.62227		2.54521		2.27827	2.74091	1.72432	2.46827	2.04994	ENSG00000137216	TMEM63B
ENSDARG00000036998	arf3b	2.4466	2.1073		2.56112		2.59811	2.26246	2.04724	2.42845	2.32614
ENSDARG00000061014	kcnj5	2.21059			1.85793		2.00904	1.75583	1.64846	1.71201	1.67807	ENSG00000120457	KCNJ5
ENSDARG00000092644	ago1	2.67156	2.66542	1.74308	2.6401		2.23093	2.07736	2.54274	3.05883	2.0794	ENSG00000092847	AGO1
ENSDARG00000102773	cacna1da	2.03182	1.5688		2.02209		2.14334	1.70711		2.06088	1.61967	ENSG00000157388	CACNA1D
ENSDARG00000106989	ENSDARG00000106989	4.23342	4.51871	3.26563	4.11045		4.4337	3.98687	4.3871	4.67832	4.03064	ENSG00000102984	ZNF821
ENSDARG00000016348	dip2bb	1.94534	1.66154		1.82681		1.82022	1.60165		1.98462	1.57158	ENSG00000066084	DIP2B
ENSDARG00000059997	sv2c	2.58804	2.19634		2.15153		2.38253	2.17486	1.83509	2.30609	2.18227	ENSG00000122012	SV2C
ENSDARG00000061635	myo5aa	2.99767	2.48995		2.46477		2.91123	2.53802	2.68999	3.02493	2.16157	ENSG00000197535	MYO5A
ENSDARG00000102331	TMEM164	2.94471	2.2754		2.31825		2.7414	2.99365	2.86882	3.05613
ENSDARG00000103917	znf185											ENSG00000147394	ZNF185
ENSDARG00000006916	VMAC	2.20136	1.72787		1.61629		1.96395	2.25852	2.20558	2.50517	1.49993
ENSDARG00000090656	tomm20a	2.48449	1.77204		1.88227		2.43247		1.80545	2.39514	1.63207	ENSG00000054267	ARID4B
ENSDARG00000032761	pde4d	2.42001	2.26191		2.49172		2.39594	2.21636	2.25114	2.5551	2.311	ENSG00000113448	PDE4D
ENSDARG00000040432	klf2b											ENSG00000105610	KLF1
ENSDARG00000099437	si:ch1073-268j14.1	3.06984	2.36355		2.13254		2.97603	2.70037	2.36432	3.2386
ENSDARG00000060597	zgc:158659	2.52279			2.07754		2.39569	2.19501		1.54242	1.84375
ENSDARG00000099979	tgfbr3	1.86672			1.57086		1.69888		1.86604	1.84598		ENSG00000069702	TGFBR3
ENSDARG00000076697	ENSDARG00000076697	2.6077	1.79349		1.98639		2.17546	2.03281		2.27595	1.80422	ENSG00000213445	SIPA1
ENSDARG00000078650	kcna4	3.53482	2.70256	2.7094	3.17978		3.44049	3.60698	3.60697	3.21917	2.47805	ENSG00000182255	KCNA4
ENSDARG00000054003	rargb	3.11221	2.88024		3.63784		3.7311	2.71018	2.56406	3.36961	2.93641	ENSG00000172819	RARG
ENSDARG00000061699	sipa1l3	2.14491	1.54681		1.59962		1.71968	1.65628	2.10373	1.97248		ENSG00000105738	SIPA1L3
ENSDARG00000062579	kremen1	2.39162	2.37847	1.72185	2.24598		2.21953	2.19618	2.83777	2.79483	2.02542	ENSG00000183762	KREMEN1
ENSDARG00000068787	slc6a17	2.95903	3.67734		3.05429		3.50526	2.9282	3.0651	3.71915	2.67278	ENSG00000197106	SLC6A17
ENSDARG00000078227	cspg4	2.31091	1.93108		2.16141		2.26672	1.84242	2.08264	2.27271	1.82801	ENSG00000173546	CSPG4
ENSDARG00000078868	tmem74b	3.02189	2.10397		2.69967		2.70215	2.68879	2.12792	3.03335	2.19837	ENSG00000125895	TMEM74B
ENSDARG00000098612	chrm2a	3.85127	2.69265				3.04394			3.71173		ENSG00000181072	CHRM2
ENSDARG00000060148	sh3pxd2aa	2.10692	1.85058		2.30807		2.18152	1.88828	1.65083	2.19609	1.81605	ENSG00000107957	SH3PXD2A
ENSDARG00000086027	si:ch211-168d23.3	1.64788			1.52341		1.54186			1.56483
ENSDARG00000018032	scn8ab	1.60638								1.49396		ENSG00000196876	SCN8A
ENSDARG00000061829	ENSDARG00000061829											ENSG00000130477	UNC13A
ENSDARG00000076622	atp13a3	1.67885	1.71714		1.82566		1.71697		1.63	1.87233	1.6997	ENSG00000133657	ATP13A3
ENSDARG00000104981	SLC45A4 (1 of many)	4.20728	3.27046		3.80755		4.00715		3.59249	3.73856	3.236	ENSG00000022567	SLC45A4
ENSDARG00000055672	map3k10	2.56262	1.92522		2.2475		2.54728	2.11121	1.55028	2.26789	1.84478	ENSG00000130758	MAP3K10
ENSDARG00000086327	srrm4											ENSG00000139767	SRRM4
ENSDARG00000099096	gabrb4	1.94914			1.54098		1.73904	1.79265		1.71021		ENSG00000268089	GABRQ
ENSDARG00000095915	col6a3	2.76234	1.6267		1.84566		2.00038		1.72269	2.11189		ENSG00000163359	COL6A3
ENSDARG00000101704	lrrc24	1.75865					1.79691	1.59009				ENSG00000254402	LRRC24
ENSDARG00000068989	gabra1				1.68169		1.66514					ENSG00000022355	GABRA1
ENSDARG00000101745	AL953886.1	2.74067	2.37288		2.76023		2.9018	2.37594	2.0626	2.90254	2.5967
ENSDARG00000103608	zgc:153431	2.7654	2.08333		2.94262		2.77773	2.72897	2.25888	2.80401	2.228	ENSG00000137216	TMEM63B
ENSDARG00000020242	fermt2	1.69339						1.52561	1.88879	1.97524		ENSG00000073712	FERMT2
ENSDARG00000098418	CABZ01092941.1	1.57945			1.5704		1.79399			1.54977
ENSDARG00000061248	xylt1	2.21572	1.63606	1.56356	1.87417		2.11267	1.88908	2.03903	2.40571	1.57833	ENSG00000103489	XYLT1
ENSDARG00000028857	sgsm1a	2.90009	2.34409		2.67467		2.83528	2.6725	2.56074	3.11555	2.32606	ENSG00000167037	SGSM1
ENSDARG00000063157	mapk8ip2	1.89029					1.6228	1.83396		1.75757		ENSG00000008735	MAPK8IP2
ENSDARG00000087018	CABZ01072853.1	3.24679	3.03731		2.84992		2.3659	3.02409	3.65327	3.37951	2.58293	ENSG00000105287	PRKD2
ENSDARG00000093708	arhgap20b	3.1917	3.40742		3.12846		3.42982		3.37017	3.85443
ENSDARG00000038716	casq1a											ENSG00000143318	CASQ1
ENSDARG00000054690	si:dkey-166k12.1
ENSDARG00000042123	nudt3b	1.8619			1.97977		2.04266	1.74447		2.06783	1.68448	ENSG00000272325	NUDT3
ENSDARG00000101508	nr6a1a	4.52759	4.53666	3.49807	4.83955		4.62012	4.15638	5.76534	5.02483	4.26927	ENSG00000148200	NR6A1
ENSDARG00000076485	ENSDARG00000076485	1.95089	1.53502		1.62405		1.90595	1.84801	2.35018	2.13652	1.51058
ENSDARG00000052091	rbpjb									1.77982		ENSG00000168214	RBPJ
ENSDARG00000070025	dchs1a											ENSG00000166341	DCHS1
ENSDARG00000076991	dolk	2.3743	1.97792		2.68327		2.34304	2.31131	2.17873	2.82883	2.32517	ENSG00000175283	DOLK
ENSDARG00000093366	acer3	1.87421	1.51183		1.97904		1.86886	1.66454	1.73906	1.98426		ENSG00000078124	ACER3
ENSDARG00000106872	CR788226.2	2.17809	1.9432		2.26436		2.30562		1.65948	2.7826	1.54193
ENSDARG00000005394	dnmt3aa	2.55905	1.86849		2.54067		2.65654		2.24259	2.57192	1.90183	ENSG00000119772	DNMT3A
ENSDARG00000077633	magixb	2.7034	1.84515	2.54386	1.90659		1.98875	2.51068	2.31368	2.74817
ENSDARG00000096920	si:zfos-375h5.1	2.5016	2.11841		2.68977		2.41027	2.17674		2.35365	2.15407	ENSG00000139767	SRRM4
ENSDARG00000098420	SNTA1	2.86917	2.39242	1.89463	2.45179		2.4189	2.58552	3.37125	3.19655	2.08871	ENSG00000101400	SNTA1
ENSDARG00000073857	klf7a	1.78596			1.69126		1.70881			1.67541		ENSG00000118263	KLF7
ENSDARG00000104727	ino80da	3.36005	2.89031		2.91194		3.16903		3.0387	3.25397	2.6146	ENSG00000114933	INO80D
ENSDARG00000089372	clk4a											ENSG00000013441	CLK1
ENSDARG00000076856	frem2a	2.02475					1.66341	1.70015	1.76893	2.03685		ENSG00000150893	FREM2
ENSDARG00000108277	ZNF462	2.93382	1.98436		1.97479		2.85113		2.38472	2.61725
ENSDARG00000019328	plxna4											ENSG00000221866	PLXNA4
ENSDARG00000021556	ubl3b								-1.61025
ENSDARG00000044034	tmem86a	2.47377	2.3468		2.51915		2.37364	2.03292	2.22454	2.68663	2.22796	ENSG00000151117	TMEM86A
ENSDARG00000056780	ssh1a	1.60921						1.61405				ENSG00000084112	SSH1
ENSDARG00000070536	creb5b	2.29526	2.7609	1.69767	2.5965		2.66822		2.13507	2.80724	2.53629	ENSG00000146592	CREB5
ENSDARG00000100562	CABZ01080702.1	1.55392							1.67015	1.64555		ENSG00000162512	SDC3
ENSDARG00000071823	adarb2	1.97093					1.66546					ENSG00000185736	ADARB2
ENSDARG00000014169	SYT2	2.65557	1.95642				1.88072	2.50817	2.52246	3.20851		ENSG00000143858	SYT2
ENSDARG00000075347	chfr											ENSG00000072609	CHFR
ENSDARG00000079064	ENSDARG00000079064	2.91708	2.79763	2.19963	2.71959		3.27548	2.51366	2.90592	3.50049	2.37692	ENSG00000186642	PDE2A
ENSDARG00000091130	kcnq2b	2.9233	2.71805		3.49315		3.46161	2.53434	2.15399	3.26646	2.62467	ENSG00000075043	KCNQ2
ENSDARG00000017220	otud7b	1.75573	1.54503		1.60466		1.96159	1.58264	1.82568	1.94256		ENSG00000264522	OTUD7B
ENSDARG00000043220	kcnh5a	3.32263	2.46771		2.4393		2.85824		3.08198	2.99453		ENSG00000140015	KCNH5
ENSDARG00000026988	tbc1d22b	2.70387	1.76711		2.16623		2.1658	2.57558	2.51834	2.60618		ENSG00000065491	TBC1D22B
ENSDARG00000063437	wnt9a	4.10081	3.71937		3.67623		3.57405		4.34846	4.42481	3.8629	ENSG00000143816	WNT9A
ENSDARG00000069318	efr3bb	2.03723	1.58578		1.90685		2.1084	1.89529	2.02372	2.16045	1.72684	ENSG00000084710	EFR3B
ENSDARG00000025206	syt2a	3.26595	2.74588		3.19729		3.54811	3.259	2.37751	3.76147	2.47867	ENSG00000143858	SYT2
ENSDARG00000037429	tll1	1.75525					1.58384	1.51992	1.61656	1.63069		ENSG00000038295	TLL1
ENSDARG00000061039	atp10a	1.94026			1.7469		1.82852	1.60401	2.08524	1.95574		ENSG00000206190	ATP10A
ENSDARG00000061718	znf704	3.71093	3.725		3.60713		3.80973	3.19934	3.38786	4.02877	3.07194	ENSG00000164684	ZNF704
ENSDARG00000078775	ENSDARG00000078775	2.63792	2.57374	1.75405	2.591		2.76703	2.26724	2.7429	3.06199	2.47338	ENSG00000155903	RASA2
ENSDARG00000060766	pxnb	1.86798	2.20618		1.64135		1.56357		2.32034	2.15961	1.77071	ENSG00000089159	PXN
ENSDARG00000002231	plpp2a	2.08267	1.67427		2.08494		1.78545	1.78529	2.31508	2.55232		ENSG00000141934	PLPP2
ENSDARG00000009493	MAP3K13	2.33034	2.30261		2.6633		2.45263	1.91623	1.85474	2.7906	2.23621	ENSG00000073803	MAP3K13
ENSDARG00000013966	psma6b		-1.95694		-1.74029					-1.57737	-1.60622	ENSG00000100902	PSMA6
ENSDARG00000027903	adamtsl3	2.19035	1.77374		1.88213		1.71295		1.81399	2.13487		ENSG00000156218	ADAMTSL3
ENSDARG00000037069	zdhhc14	1.59369										ENSG00000175048	ZDHHC14
ENSDARG00000059534	ENSDARG00000059534											ENSG00000154118	JPH3
ENSDARG00000061040	pum2	1.95523	1.6887		1.92024		2.04397	1.57976	1.67967	2.05243	1.57731	ENSG00000055917	PUM2
ENSDARG00000069958	sh2b3	2.01764	2.08421		1.75997		1.58766	1.66448	2.17772	2.29063	1.50855	ENSG00000111252	SH2B3
ENSDARG00000073822	ENSDARG00000073822	2.10285	1.70797		1.59656		2.02705	1.9907	2.09071	2.07694		ENSG00000144711	IQSEC1
ENSDARG00000077656	arfgef3	1.96897	1.71976		1.97538		1.92825			1.97283	1.56718	ENSG00000112379	ARFGEF3
ENSDARG00000077761	nlgn4b	3.50213	2.41065		3.51822		4.04799	3.39896	2.3169	3.69856	2.7549	ENSG00000146938	NLGN4X
ENSDARG00000098751	lzts3a	1.99513	1.66237		1.75961		2.11154			2.04878	1.59273	ENSG00000088899	LZTS3
ENSDARG00000099005	palm2	3.34625	3.4312		3.33924		3.55721	3.19642	4.17321	3.944	3.11879	ENSG00000243444	PALM2
ENSDARG00000052465	dusp10	3.59602	4.01957	3.12394	3.80632		3.41871	4.02557	4.27608	4.04237	3.37723	ENSG00000143507	DUSP10
ENSDARG00000077134	gpr158a	2.12642	1.66974		1.56199		2.05316	1.82078	1.49886	1.89891		ENSG00000151025	GPR158
ENSDARG00000035308	grb10b	1.79618	2.20019		1.9088		1.86963	1.63441	2.16363	2.72662	1.61258	ENSG00000106070	GRB10
ENSDARG00000087887	phf21b									1.68578
ENSDARG00000098290	unc80	3.33747	2.82022		3.17349		3.18898		2.81466	3.36094	2.74042	ENSG00000144406	UNC80
ENSDARG00000103155	ext1a											ENSG00000182197	EXT1
ENSDARG00000053665	gabrg2	1.88171	1.7443		2.08839		2.13054	1.78947		2.10562	1.71534	ENSG00000113327	GABRG2
ENSDARG00000079752	col6a4a
ENSDARG00000100679	lrch3	2.33654	2.56882	1.62572	2.89268		2.81783	2.11556	2.75154	2.93482	2.4012	ENSG00000186001	LRCH3
ENSDARG00000102436	si:ch211-194b1.1	1.91915	1.55375		1.78026		2.2867			1.95729	1.72397	ENSG00000011451	WIZ
ENSDARG00000036156	fnbp1a	2.31578	1.53967		2.3718		2.32058	2.01936	1.7831	2.02334	1.94556	ENSG00000187239	FNBP1
ENSDARG00000054941	ldlrad4b	1.94133						1.61362		1.82678		ENSG00000168675	LDLRAD4
ENSDARG00000061960	ube3b											ENSG00000151148	UBE3B
ENSDARG00000001968	dock5	2.36285	2.38752	1.87301	2.39037		2.2736	1.9773	3.08266	2.83139	2.04984	ENSG00000147459	DOCK5
ENSDARG00000025974	magi3b	1.98542	1.96206		1.6564		1.58856		1.67291	2.41536	1.57912	ENSG00000081026	MAGI3
ENSDARG00000078011	NAV1 (1 of many)	2.17269			1.92523		1.92276		1.81691	1.7792	1.58806	ENSG00000134369	NAV1
ENSDARG00000089428	rab12											ENSG00000206418	RAB12
ENSDARG00000032039	mxd1	1.81465	1.57998		2.01502		1.64882	1.58652		2.0758	1.62825	ENSG00000059728	MXD1
ENSDARG00000077474	pla2r1	1.86788	1.54509		1.66108		1.78057	1.6082	1.99843	2.09767	1.51494	ENSG00000153246	PLA2R1
ENSDARG00000098349	hdac4											ENSG00000068024	HDAC4
ENSDARG00000043553	ches1	2.57894	2.34662	1.96132	2.34286		2.68645	2.48296	1.96959	2.92584	1.98667
ENSDARG00000003145	ENSDARG00000003145	1.96655	1.60988				1.78768	1.78201	1.6686	1.94513	1.64013
ENSDARG00000091792	akap12a
ENSDARG00000102200	man2a1	1.84464	1.98083	1.55201	2.05137		1.6294	1.60704	2.254	2.42318	2.05393	ENSG00000112893	MAN2A1
ENSDARG00000062305	rims3	6.35869	6.25524	4.94042	5.54735		5.85581	6.36163	5.71383	6.85604	5.60556	ENSG00000117016	RIMS3
ENSDARG00000002026	qkib	1.54498
ENSDARG00000063730	osbpl6	2.79665	2.1913		2.64548		2.80202	2.40017	2.43228	2.78069		ENSG00000079156	OSBPL6
ENSDARG00000074073	map6b				1.50573		1.63757					ENSG00000171533	MAP6
ENSDARG00000079756	peak1								1.79245	1.67554		ENSG00000173517	PEAK1
ENSDARG00000023236	kcnh1b	1.52755										ENSG00000143473	KCNH1
ENSDARG00000027777	tnfaip3	2.08375	2.43128		2.31804		2.01437		1.94485	2.31224	2.05413	ENSG00000118503	TNFAIP3
ENSDARG00000071741	zgc:112977	-1.4951
ENSDARG00000093799	setbp1	1.74753	1.50606		1.57912		1.69837	1.63624		2.05286		ENSG00000152217	SETBP1
ENSDARG00000101131	pbx1b	1.90481	1.64553		2.04436		2.14876			2.14039	1.64541	ENSG00000185630	PBX1
ENSDARG00000020845	tns1b	2.03858	1.50947		1.77244		1.80213		1.84795	2.1502	1.54855	ENSG00000079308	TNS1
ENSDARG00000033802	cyp27a7											ENSG00000135929	CYP27A1
ENSDARG00000105490	rph3ab											ENSG00000089169	RPH3A
ENSDARG00000018809	abhd3											ENSG00000158201	ABHD3
ENSDARG00000061368	klf13	2.20683			1.85527		2.18439			1.74832		ENSG00000169926	KLF13
ENSDARG00000060551	rps6ka5	2.72194	2.55866		2.95162		2.95128	2.48096	2.65915	2.95232	2.17951	ENSG00000100784	RPS6KA5
ENSDARG00000076870	piezo1								1.58455	1.63403		ENSG00000103335	PIEZO1
ENSDARG00000005479	tenm3											ENSG00000218336	TENM3
ENSDARG00000029668	crim1	1.64104							1.65517	1.80388		ENSG00000150938	CRIM1
ENSDARG00000063007	apc2	1.77231								1.49298		ENSG00000115266	APC2
ENSDARG00000076292	tns2a	1.97873	1.71202		1.84928		1.97825		1.93403	2.22067		ENSG00000111077	TNS2
ENSDARG00000076309	mxra5b	4.0598	3.55043		3.12037		3.98414		3.43089	3.76077		ENSG00000101825	MXRA5
ENSDARG00000020149	acoxl	2.11489		1.66593	2.11458		2.38633	1.97872	2.46894	2.4995	1.62924	ENSG00000153093	ACOXL
ENSDARG00000046150	b4galnt4a											ENSG00000182272	B4GALNT4
ENSDARG00000058371	krt5											ENSG00000135480	KRT1
ENSDARG00000102142	ece2b	2.09588	2.07858		2.34064		2.40941	2.21182	2.17338	2.51863	1.9427	ENSG00000145194	ECE2
ENSDARG00000055133	cenpf
ENSDARG00000060016	nsd1a											ENSG00000165671	NSD1
ENSDARG00000051886	ankrd11											ENSG00000167522	ANKRD11
ENSDARG00000013020	dtnbb	1.88166			2.03328		2.18031	1.74152		1.89156	1.49078	ENSG00000138101	DTNB
ENSDARG00000075972	csrnp2	2.04834	1.517		2.18932		1.95493	1.86891	1.86486	2.10243	1.76134	ENSG00000110925	CSRNP2
ENSDARG00000077229	ano8b	2.36386	1.7778		2.01167		2.40112		1.50547	2.19958		ENSG00000074855	ANO8
ENSDARG00000003544	adarb1b	2.56211	2.12778		2.40106		2.66954	2.27443	2.07133	2.74246	1.98956	ENSG00000197381	ADARB1
ENSDARG00000063544	pip4k2ab	1.80614			1.95587		1.94264	1.86102		1.82981	1.75806	ENSG00000150867	PIP4K2A
ENSDARG00000103576	EPHB3
ENSDARG00000078890	wdfy3	1.57181										ENSG00000163625	WDFY3
ENSDARG00000011152	rpp14											ENSG00000163684	RPP14
ENSDARG00000018773	hivep2b	2.42133	1.76912		1.94294		2.40923	2.24777	2.62479	2.46794	1.99086	ENSG00000010818	HIVEP2
ENSDARG00000097650	atg2b	2.48229	2.3693		2.3325		2.11708	2.34473	2.68515	2.76693		ENSG00000066739	ATG2B
ENSDARG00000102556	nfat5b	2.46285	1.88576		1.72421		2.14334	2.29385	1.92517	2.15261		ENSG00000102908	NFAT5
ENSDARG00000105114	crebrf	2.16621	2.58812				2.10669		2.07086	2.74522		ENSG00000164463	CREBRF
ENSDARG00000061687	atxn1a	1.95547	1.72926	1.51741	1.87162		2.24383		2.01826	2.20656	1.60236	ENSG00000124788	ATXN1
ENSDARG00000095614	cacna1eb	2.32436	1.96796		2.1979		2.00333		2.05632	2.51911		ENSG00000198216	CACNA1E
ENSDARG00000027423	igf1ra	1.54915								1.70636		ENSG00000140443	IGF1R
ENSDARG00000075296	fam83c	2.26116	2.09187		2.0002		2.06085	2.27492	2.65684	2.3135	1.81898	ENSG00000125998	FAM83C
ENSDARG00000017986	vps13d											ENSG00000048707	VPS13D
ENSDARG00000106473	CABZ01076964.1	2.5926	1.93138		2.10604		2.17056		1.83892	2.40683	2.40185	ENSG00000055118	KCNH2
ENSDARG00000083519	AC024175.24		-1.76654
ENSDARG00000059596	clip2											ENSG00000106665	CLIP2
ENSDARG00000006094	igf2r	1.65173	1.67245		1.64214		1.85096	1.57505	2.24522	2.39966		ENSG00000197081	IGF2R
ENSDARG00000042859	slc5a6a	2.35078	2.9386	2.10209	2.6867		2.74106	2.48377	3.27045	3.51098	2.51377	ENSG00000138074	SLC5A6
ENSDARG00000041791	mgat4c	2.19798	1.94442		1.85878		2.15008	1.96607		2.07717		ENSG00000182050	MGAT4C
ENSDARG00000108787	TRIM67	2.29064	1.99945		2.49616		3.01492			2.31241	1.84103	ENSG00000119283	TRIM67
ENSDARG00000105088	tenm4											ENSG00000149256	TENM4
ENSDARG00000092552	fndc7rs2	4.39056	3.20614		3.26689		4.36809	4.48563		4.52794		ENSG00000143107	FNDC7
ENSDARG00000107130	CABZ01112891.1	2.4814	2.51313	2.36551	2.29606		2.05694		3.26684	2.62898	2.39768
ENSDARG00000035273	tmtc2b											ENSG00000179104	TMTC2
ENSDARG00000062949	nt5dc3	1.60444			1.6454		1.49978	1.65324	1.921	2.08178		ENSG00000111696	NT5DC3
ENSDARG00000045515	kin											ENSG00000151657	KIN
ENSDARG00000063264	pcdh9	2.02062					1.59361			1.77588		ENSG00000184226	PCDH9
ENSDARG00000091548	stard9											ENSG00000159433	STARD9
ENSDARG00000074686	mgea5											ENSG00000198408	OGA
ENSDARG00000075271	rapgef5a											ENSG00000136237	RAPGEF5
ENSDARG00000077686	aak1b											ENSG00000115977	AAK1
ENSDARG00000093671	BX001030.1
ENSDARG00000010519	per3											ENSG00000049246	PER3
ENSDARG00000063062	ubn2a											ENSG00000157741	UBN2
ENSDARG00000020718	SLC25A22	1.76238			1.62887			2.0012		1.64164		ENSG00000177542	SLC25A22
ENSDARG00000052279	osgn1
ENSDARG00000078163	hpse2	2.67375	1.84667				2.38188	2.57517	1.81689	2.65138
ENSDARG00000006923	cacna1ab	2.20997	1.78267		1.89099		2.25879		1.71686	2.24589		ENSG00000141837	CACNA1A
ENSDARG00000058259	celsr1b									1.50383		ENSG00000075275	CELSR1
ENSDARG00000077188	atrnl1a						1.58979					ENSG00000107518	ATRNL1
ENSDARG00000087822	agap3	2.08868	2.0356	1.56467	2.18917		2.36476	1.90054	2.17916	2.61061	1.97895	ENSG00000133612	AGAP3
ENSDARG00000102620	CABZ01076674.1	1.82851	2.0789		1.71789		1.83781		1.70288	2.45663	1.52849
ENSDARG00000103892	CABZ01074203.1	3.16116	2.69097		2.90172		2.92776	3.04589	2.49135	3.29228		ENSG00000163083	INHBB
ENSDARG00000063180	dock3	1.97857					1.72822					ENSG00000088538	DOCK3
ENSDARG00000102082	nr3c2	2.04496			1.78425		2.16412		1.57568	1.77466		ENSG00000151623	NR3C2
ENSDARG00000076213	DOCK4 (1 of many)	2.35575	2.00409	1.64588	2.48625		2.5788		1.87443	2.40779	2.04352	ENSG00000128512	DOCK4
ENSDARG00000093359	inpp5jb	4.57371	4.19499		4.07666		4.50504	4.8181	4.62374	4.64204	4.21861	ENSG00000185133	INPP5J
ENSDARG00000008575	lyst	1.5626										ENSG00000143669	LYST
ENSDARG00000086819	scn1a	4.08604	3.18143		3.42481		3.97863		4.38566	3.60266		ENSG00000136531	SCN1A
ENSDARG00000069484	dab2ipa	1.90301					1.56903			1.69646		ENSG00000136848	DAB2IP
ENSDARG00000098511	ntrk2b	2.01343	1.72012		1.55628		2.07837	1.938		2.08101		ENSG00000148053	NTRK2
ENSDARG00000013144	atp1b1a											ENSG00000143153	ATP1B1
ENSDARG00000013828	snx13	1.81941	1.54036		1.75534		1.9181	1.66245	1.85314	1.99932		ENSG00000071189	SNX13
ENSDARG00000021137	adgrv1											ENSG00000164199	ADGRV1
ENSDARG00000098573	sgcd		1.58546		1.54281		1.62855		1.89723	2.00498	1.54533	ENSG00000170624	SGCD
ENSDARG00000099364	BX511034.6	2.59185	2.99458	2.53398	3.02787		2.74352	3.03599	2.76324	3.92031	2.65555
ENSDARG00000100402	fgd1											ENSG00000102302	FGD1
ENSDARG00000100947	mafk	1.87515	2.0438		1.5824		1.8628	1.76726	2.03657	2.33999		ENSG00000198517	MAFK
ENSDARG00000103834	rbm14b											ENSG00000239306	RBM14
ENSDARG00000053773	vgll2b								-1.56755	-1.70421
ENSDARG00000054771	ghra	1.60296								1.89413		ENSG00000112964	GHR
ENSDARG00000099930	col27a1b											ENSG00000196739	COL27A1
ENSDARG00000035127	rxrab	2.68159	2.36985		2.36564		2.74229		2.59337	3.08895	2.20649	ENSG00000186350	RXRA
ENSDARG00000016490	rab11fip3	1.93785			1.62552		1.7269	1.83142	1.51567	1.77455
ENSDARG00000076638	MEX3A	1.90954	1.88402		1.95032		1.96352			2.0009	1.72544	ENSG00000254726	MEX3A
ENSDARG00000079253	plch1											ENSG00000114805	PLCH1
ENSDARG00000098057	dscaml1	1.87878					1.70358					ENSG00000177103	DSCAML1
ENSDARG00000056133	kitb	1.56557										ENSG00000157404	KIT
ENSDARG00000015425	slc24a4a											ENSG00000140090	SLC24A4
ENSDARG00000041982	adamts6											ENSG00000049192	ADAMTS6
ENSDARG00000012833	foxn3	1.88581	1.95607		2.0384		2.12042		1.59603	2.26139	1.90949	ENSG00000053254	FOXN3
ENSDARG00000079766	tap1	1.59974	2.35303	1.62105			2.11337	1.51204	2.43776	1.79561	1.63094	ENSG00000168394	TAP1
ENSDARG00000012586	fmnl2a	1.95789	1.7642		1.91798		1.94204		2.11722	1.82828	1.52341	ENSG00000157827	FMNL2
ENSDARG00000028800	CYTH2											ENSG00000105443	CYTH2
ENSDARG00000020957	pth1ra	2.89061	2.10551		2.73465		2.79879			2.73994		ENSG00000160801	PTH1R
ENSDARG00000040442	prtgb		2.07061						2.16082	2.2002		ENSG00000166450	PRTG
ENSDARG00000101587	CABZ01023254.1
ENSDARG00000093438	CU467110.1						1.68336			1.63589
ENSDARG00000103851	tnrc6c2											ENSG00000078687	TNRC6C
ENSDARG00000091408	mtcl1	2.03135			1.53138		1.88662			1.72705		ENSG00000168502	MTCL1
ENSDARG00000062082	hipk3b	1.70277	1.66064		1.5214		1.65074		1.97429	2.17592	1.62282	ENSG00000110422	HIPK3
ENSDARG00000063158	CABZ01081780.1	1.76259					1.99165					ENSG00000155886	SLC24A2
ENSDARG00000025299	tspan9a	2.40988	1.941		2.20622		2.42978	2.3408	2.24796	2.52087	1.93382	ENSG00000011105	TSPAN9
ENSDARG00000052496	hmha1a	2.97987	3.03254		2.86005		2.84621		3.15199	3.04451		ENSG00000180448	ARHGAP45
ENSDARG00000078355	zc3h4											ENSG00000130749	ZC3H4
ENSDARG00000017211	plxnb1b											ENSG00000164050	PLXNB1
ENSDARG00000043211	ripk4											ENSG00000183421	RIPK4
ENSDARG00000003041	CABZ01111496.1	2.67985	3.11203	2.02445	2.85025		2.57996	2.61638	3.17336	3.48641	2.52421
ENSDARG00000099719	cdkn1d
ENSDARG00000043757	ptbp3									1.64182		ENSG00000119314	PTBP3
ENSDARG00000019658	pou2f2a									1.60165		ENSG00000028277	POU2F2
ENSDARG00000062634	kat2b	1.59746	1.742		1.88081		1.69035	1.5506		1.84245	1.75668
ENSDARG00000024167	kcnh1a	3.32182	2.76343		3.00058			3.38494	3.18595	3.50546	3.29551	ENSG00000143473	KCNH1
ENSDARG00000061265	lmln	1.61953			1.87126		1.6131	1.70549	1.68783	1.60268	1.57265	ENSG00000185621	LMLN
ENSDARG00000074041	abca5											ENSG00000154265	ABCA5
ENSDARG00000079805	tagln3a	1.80481					1.89972	1.81369		1.85117		ENSG00000144834	TAGLN3
ENSDARG00000078784	mgaa											ENSG00000174197	MGA
ENSDARG00000089489	fam83e											ENSG00000105523	FAM83E
ENSDARG00000019601	col12a1b											ENSG00000111799	COL12A1
ENSDARG00000011855	aak1a											ENSG00000115977	AAK1
ENSDARG00000055106	znf148											ENSG00000163848	ZNF148
ENSDARG00000057911	ACTC1											ENSG00000159251	ACTC1
ENSDARG00000059601	map1aa											ENSG00000166963	MAP1A
ENSDARG00000035809	col1a1b											ENSG00000108821	COL1A1
ENSDARG00000006990	creld1b											ENSG00000163703	CRELD1
ENSDARG00000013582	csnk2a2b											ENSG00000070770	CSNK2A2
ENSDARG00000100011	strn											ENSG00000115808	STRN
ENSDARG00000042969	znf1035
ENSDARG00000012467	spint1b											ENSG00000166145	SPINT1
ENSDARG00000098702	zgc:165603	3.00509	3.23934		2.37332		2.62663		2.98246	3.5328	2.8091	ENSG00000161082	CELF5
ENSDARG00000089435	macf1b	2.04582	1.87455		2.1594		2.15865		2.14243	2.23663
ENSDARG00000008485	lrp3											ENSG00000130881	LRP3
ENSDARG00000075139	hdac5											ENSG00000108840	HDAC5
ENSDARG00000012449	si:ch211-169p10.1	3.07859	3.10867		3.09374		2.95742		3.59253	3.7431	2.87901	ENSG00000147144	CCDC120
ENSDARG00000098495	si:dkey-201i24.6	3.31938	2.91331	2.75926			3.18448		2.2458	3.30569
ENSDARG00000007561	cdh23	2.55369	2.23098		2.3332		2.43727		2.25764	2.49888		ENSG00000107736	CDH23
ENSDARG00000076075	myh7ba											ENSG00000078814	MYH7B
ENSDARG00000079068	adam12	1.59843	1.62856		1.50788					1.8523		ENSG00000148848	ADAM12
ENSDARG00000067567	SLC6A13	1.5172					1.56789					ENSG00000010379	SLC6A13
ENSDARG00000024314	herpud1											ENSG00000051108	HERPUD1
ENSDARG00000060865	scai	2.00287	1.56937		1.90794		2.02821			2.18275		ENSG00000173611	SCAI
ENSDARG00000094901	abcc6b.2						1.607		1.57843
ENSDARG00000037172	ddrgk1										1.59881	ENSG00000198171	DDRGK1
ENSDARG00000044954	slit1a											ENSG00000187122	SLIT1
ENSDARG00000078187	slc12a5b	2.21734	2.15886		2.56161		2.6735	2.16909	1.81155	2.68115	2.37378	ENSG00000124140	SLC12A5
ENSDARG00000076041	wwc1	1.93942	2.04212		2.31477		2.35289	1.91989	2.37482	2.58732	1.79171	ENSG00000113645	WWC1
ENSDARG00000020872	nfat5a	1.71315			1.73001				1.58259	2.08422	2.03519	ENSG00000102908	NFAT5
ENSDARG00000063075	soga1											ENSG00000149639	SOGA1
ENSDARG00000006251	ell2											ENSG00000118985	ELL2
ENSDARG00000015110	slc18a2
ENSDARG00000063706	pde8b	2.40109	2.14393	1.92354			2.17269		2.24793	2.35793		ENSG00000113231	PDE8B
ENSDARG00000106725	CABZ01037120.1	1.58104						1.80551
ENSDARG00000053684	aldob				-1.6098				-1.53391	-1.69816	-1.61443	ENSG00000136872	ALDOB
ENSDARG00000003069	btbd7											ENSG00000011114	BTBD7
ENSDARG00000009738	cacnb4a	2.54627	2.44452		2.58411		2.9114		1.91042	2.88502		ENSG00000182389	CACNB4
ENSDARG00000018788	st8sia2											ENSG00000140557	ST8SIA2
ENSDARG00000061660	CABZ01055347.1
ENSDARG00000062248	ptpn21	2.43115	2.87288		2.55875		2.91683		3.14194	3.30785	2.28361	ENSG00000070778	PTPN21
ENSDARG00000062991	abi1b						1.51481			1.52237		ENSG00000136754	ABI1
ENSDARG00000052747	gpatch3											ENSG00000198746	GPATCH3
ENSDARG00000106573	sbno2a	2.73353	2.76857		3.18757		3.21691		2.98363	3.42383	2.4383
ENSDARG00000033498	rorb											ENSG00000198963	RORB
ENSDARG00000018782	kdm4aa											ENSG00000066135	KDM4A
ENSDARG00000070050	sfrp2										-1.70286	ENSG00000145423	SFRP2
ENSDARG00000015293	fam110a											ENSG00000125898	FAM110A
ENSDARG00000059738	ptprsa											ENSG00000105426	PTPRS
ENSDARG00000014954	snx33											ENSG00000173548	SNX33
ENSDARG00000069438	neurl1aa											ENSG00000107954	NEURL1
ENSDARG00000027290	nrp1b
ENSDARG00000060941	ANKFN1	1.97985	1.73479		2.23063		1.92216		1.66024	1.96641		ENSG00000153930	ANKFN1
ENSDARG00000062884	map3k2	3.12486	2.80105		2.96448		3.22924		3.6288	3.50103		ENSG00000169967	MAP3K2
ENSDARG00000073769	magi2b	2.58266			2.51317		2.21607		1.94871	2.40172		ENSG00000187391	MAGI2
ENSDARG00000079295	cacna1bb	1.74675			1.50416		1.6425					ENSG00000148408	CACNA1B
ENSDARG00000092369	si:dkeyp-77c8.3	1.85889	1.60126						2.24276	2.11035
ENSDARG00000058822	wnt3a		1.51552		1.56656				2.33372	1.88247		ENSG00000154342	WNT3A
ENSDARG00000106522	ENSDARG00000106522	2.97919	2.66627	2.45256	2.87522		3.40288		2.05655	3.35339	3.10148	ENSG00000176204	LRRTM4
ENSDARG00000077384	dnah11	2.98045	2.76021		2.89828		3.03353		3.33924	2.93097
ENSDARG00000043226	nfixa	2.63686			2.14019		2.41552					ENSG00000008441	NFIX
ENSDARG00000098566	si:ch73-233f7.4	1.56957					1.55549	1.87204		1.56928		ENSG00000240184	PCDHGC3
ENSDARG00000032197	klf12b	1.57441								1.54798		ENSG00000118922	KLF12
ENSDARG00000079148	nckap5l											ENSG00000167566	NCKAP5L
ENSDARG00000104283	cdc42bpaa	3.01914	2.79212	2.29053	2.61737		3.15842		3.41836	3.39977		ENSG00000143776	CDC42BPA
ENSDARG00000059900	tbc1d9											ENSG00000109436	TBC1D9
ENSDARG00000078324	PRDM16											ENSG00000142611	PRDM16
ENSDARG00000079751	megf8											ENSG00000105429	MEGF8
ENSDARG00000091619	mvb12ba				1.67805					1.64238	1.55473	ENSG00000196814	MVB12B
ENSDARG00000028396	fkbp5			2.849	-1.81088					-1.74573	-2.05086	ENSG00000096060	FKBP5
ENSDARG00000076702	CABZ01068356.1	2.38841	1.91532						1.94289	2.28542		ENSG00000059915	PSD
ENSDARG00000102610	R3HDM2	1.52464										ENSG00000179912	R3HDM2
ENSDARG00000060103	cpeb3									1.5437		ENSG00000107864	CPEB3
ENSDARG00000019588	chico	1.77027			1.60776		1.58999		1.67275	1.79061	1.53313	ENSG00000104964	AES
ENSDARG00000055825	celsr3											ENSG00000008300	CELSR3
ENSDARG00000102641	CR925761.3	-1.53998			-1.55622						-1.61631
ENSDARG00000053389	jade2	2.2355	2.09564		1.81691		2.29346	2.16974	2.23989	2.43672		ENSG00000043143	JADE2
ENSDARG00000019392	stat5a	1.83741	1.49601		1.54602		1.79848		1.81423	2.15086		ENSG00000126561	STAT5A
ENSDARG00000001559	csmd2											ENSG00000121904	CSMD2
ENSDARG00000045658	msrb3											ENSG00000174099	MSRB3
ENSDARG00000087373	dnah5
ENSDARG00000000606	dnah6											ENSG00000115423	DNAH6
ENSDARG00000037813	zgc:113278	1.6359			1.69517		1.88475		1.9798	1.89689
ENSDARG00000067927	CABZ01059104.1	1.90432	1.73413		1.60558		2.20309	2.0288	1.81878	2.62521	1.68085	ENSG00000115363	EVA1A
ENSDARG00000092934	si:dkey-32e6.3
ENSDARG00000002571	tmod2											ENSG00000128872	LOC112268148
ENSDARG00000061517	lrp1bb											ENSG00000168702	LRP1B
ENSDARG00000102387	slc39a14											ENSG00000104635	SLC39A14
ENSDARG00000029916	KCNQ2	2.33456	1.76898		2.08028		2.35463			2.39906
ENSDARG00000017246	prx	4.18096	3.73148		3.71441		4.35085		5.01906	4.60863		ENSG00000105227	PRX
ENSDARG00000059965	camsap2b											ENSG00000118200	CAMSAP2
ENSDARG00000007996	pou2f1b											ENSG00000143190	POU2F1
ENSDARG00000034165	lingo1a											ENSG00000169783	LINGO1
ENSDARG00000106743	CABZ01053592.1	2.65135					2.64777		1.84919	2.32524
ENSDARG00000074742	elmod3	2.01809	1.71672		2.11854		2.45031	2.26969	2.31383	2.35281		ENSG00000115459	ELMOD3
ENSDARG00000088136	pcdh2aa15											ENSG00000081842	PCDHA1
ENSDARG00000070575	fam131bb				1.52706			1.7372		1.82702		ENSG00000159784	FAM131B
ENSDARG00000059846	epg5											ENSG00000152223	EPG5
ENSDARG00000074376	mdga1	2.15285		1.74839			1.93271					ENSG00000112139	MDGA1
ENSDARG00000098625	efna5b	2.06218	1.58527		1.97603		1.7876	2.01973	1.60436	2.0138
ENSDARG00000061021	fam160a1a									1.51467		ENSG00000164142	FAM160A1
ENSDARG00000098327	CT573860.1		2.23984		1.87284		1.77477	1.64129	2.74783	2.46725
ENSDARG00000023498	gmppab											ENSG00000144591	GMPPA
ENSDARG00000045768	cry1aa						1.49327					ENSG00000008405	CRY1
ENSDARG00000077909	rce1a				1.62113				1.52818			ENSG00000173653	RCE1
ENSDARG00000089538	rnf166											ENSG00000158717	RNF166
ENSDARG00000100097	mafgb				1.6925		1.67749					ENSG00000197063	MAFG
ENSDARG00000104490	CT009570.1	2.21284	2.28596		2.56943		2.25971		2.43844	2.56605	2.05428
ENSDARG00000012699	bbx	2.80344			2.62803		3.04135		2.60908	2.88857		ENSG00000114439	BBX
ENSDARG00000075083	prkdc											ENSG00000253729	PRKDC
ENSDARG00000099995	apbb2b									1.65767		ENSG00000163697	APBB2
ENSDARG00000103792	CABZ01076737.1	2.64146	1.99646		2.42899		2.79177			2.12426
ENSDARG00000062745	socs5b				1.79314		1.59365			1.50718		ENSG00000171150	SOCS5
ENSDARG00000003584	pla2g7											ENSG00000146070	PLA2G7
ENSDARG00000098666	si:dkey-93h22.8											ENSG00000148840	PPRC1
ENSDARG00000035357	gnb2											ENSG00000172354	GNB2
ENSDARG00000101687	CU929259.1	1.57815					1.55027		1.98649	2.34919		ENSG00000047849	MAP4
ENSDARG00000033840	fat3a	1.55091								1.53259		ENSG00000165323	FAT3
ENSDARG00000060534	sgpp1				1.56956					1.89635		ENSG00000126821	SGPP1
ENSDARG00000005775	scn8aa											ENSG00000196876	SCN8A
ENSDARG00000061311	znf438											ENSG00000183621	ZNF438
ENSDARG00000062744	scn1lab											ENSG00000136531	SCN1A
ENSDARG00000100620	taok2b	1.52401								1.6092		ENSG00000149930	TAOK2
ENSDARG00000016868	rhobtb2a
ENSDARG00000029482	ush2a											ENSG00000042781	USH2A
ENSDARG00000101512	tmx4									1.89056		ENSG00000125827	TMX4
ENSDARG00000012381	hsc70
ENSDARG00000039677	dsc2l											ENSG00000134755	DSC1
ENSDARG00000102095	si:ch73-233f7.5	1.77477			1.90061		1.75916	1.95682		1.78982	1.52614
ENSDARG00000076801	arap3											ENSG00000120318	ARAP3
ENSDARG00000003449	pde10a	1.82541	1.57677				1.5256		1.76794	2.03331		ENSG00000112541	PDE10A
ENSDARG00000052734	hmgcra		2.81026	1.54951						3.72388		ENSG00000113161	HMGCR
ENSDARG00000043799	ENSDARG00000043799	1.50046			1.7441		1.67638			1.6389		ENSG00000119771	KLHL29
ENSDARG00000075549	cdh5											ENSG00000179776	CDH5
ENSDARG00000059472	arhgap31											ENSG00000031081	ARHGAP31
ENSDARG00000078270	CU467961.1
ENSDARG00000010400	lrrfip2											ENSG00000093167	LRRFIP2
ENSDARG00000062521	atp9b											ENSG00000166377	ATP9B
ENSDARG00000090617	ctif	1.66428	2.01807		1.9192		2.03917		2.12998	2.58373	1.81796	ENSG00000134030	CTIF
ENSDARG00000063069	gripap1											ENSG00000068400	GRIPAP1
ENSDARG00000079623	ubtd1b						1.6699		2.30599	1.87345		ENSG00000165886	UBTD1
ENSDARG00000102612	slc15a4				1.81534		1.96454		1.7921	1.92448	1.54801	ENSG00000139370	SLC15A4
ENSDARG00000097673	CT573494.2	2.80471	2.35139	2.75768					2.54458	3.17293
ENSDARG00000056764	hydin								1.57028			ENSG00000157423	HYDIN
ENSDARG00000042259	tgfbr1b	1.81075	1.78966		1.54227		1.80228		1.61537	2.34718		ENSG00000106799	TGFBR1
ENSDARG00000074723	myo10l1	1.8975			1.98504		2.24168			1.94436
ENSDARG00000079046	RABL6 (1 of many)											ENSG00000196642	RABL6
ENSDARG00000026294	erbb2								1.77432	1.73161		ENSG00000141736	ERBB2
ENSDARG00000028541	si:ch211-121a2.4	1.88549	1.83918		2.02579		2.34452	1.98987	2.35228	2.3555
ENSDARG00000037421	egr1											ENSG00000120738	EGR1
ENSDARG00000045799	acanb								1.62185			ENSG00000157766	ACAN
ENSDARG00000076919	igdcc4											ENSG00000103742	IGDCC4
ENSDARG00000090190	bcam											ENSG00000187244	BCAM
ENSDARG00000099280	utp20											ENSG00000120800	UTP20
ENSDARG00000001776	stim2b											ENSG00000109689	STIM2
ENSDARG00000079015	brca2											ENSG00000139618	BRCA2
ENSDARG00000079742	mcf2l2	2.89293	2.73921		2.98726		3.268		2.548	3.46577		ENSG00000053524	MCF2L2
ENSDARG00000079878	tmem151bb	2.20531	2.11206		2.15337		2.20313	2.35053	1.70548	2.5933		ENSG00000178233	TMEM151B
ENSDARG00000037618	ddit4											ENSG00000168209	DDIT4
ENSDARG00000061992	dot1l	1.72277			1.73963		1.93305		1.5842	1.99277		ENSG00000104885	DOT1L
ENSDARG00000024874	dock4b											ENSG00000128512	DOCK4
ENSDARG00000059523	rims4	1.73548	1.7255		1.54191		1.92276			1.93339		ENSG00000101098	RIMS4
ENSDARG00000039181	trpm3											ENSG00000083067	TRPM3
ENSDARG00000104082	trps1											ENSG00000104447	TRPS1
ENSDARG00000037675	npm1b
ENSDARG00000058284	CT990561.1				1.83997							ENSG00000145242	EPHA5
ENSDARG00000075916	zgc:66472
ENSDARG00000010565	aqp4	1.98346			2.17996				1.75108	2.06826		ENSG00000171885	AQP4
ENSDARG00000037373	ephb2a											ENSG00000133216	EPHB2
ENSDARG00000078688	frs3				1.71224		1.8038			1.56768	1.56272	ENSG00000137218	FRS3
ENSDARG00000101322	tfr1a									1.61161		ENSG00000072274	TFRC
ENSDARG00000063207	erbb4a	1.875					1.50658			1.76206
ENSDARG00000008976	mdn1											ENSG00000112159	MDN1
ENSDARG00000101175	mcu	1.97393			1.88081		2.00422		2.31097	2.25707		ENSG00000156026	MCU
ENSDARG00000102377	slc6a16b		1.66372							2.25877
ENSDARG00000052604	cpeb2											ENSG00000137449	CPEB2
ENSDARG00000100825	calm3a		-1.70075
ENSDARG00000061466	cpne5a	1.53146										ENSG00000124772	CPNE5
ENSDARG00000098984	pid1											ENSG00000153823	PID1
ENSDARG00000016074	cryz											ENSG00000116791	CRYZ
ENSDARG00000008765	tmed5											ENSG00000117500	TMED5
ENSDARG00000076005	piezo2a.2											ENSG00000154864	PIEZO2
ENSDARG00000078135	mrc2								1.73276	1.55135		ENSG00000011028	MRC2
ENSDARG00000100592	slc8a2b	2.06535	1.6363		1.87079		1.90032		1.74549	2.21096		ENSG00000118160	SLC8A2
ENSDARG00000105463	CR352285.2								-2.37649
ENSDARG00000058565	socs6a											ENSG00000170677	SOCS6
ENSDARG00000005560	ywhah											ENSG00000128245	YWHAH
ENSDARG00000013005	opcml						1.55504					ENSG00000182667	NTM
ENSDARG00000101361	znf644a											ENSG00000122482	ZNF644
ENSDARG00000031702	prkg1b		1.78413									ENSG00000185532	PRKG1
ENSDARG00000074548	zbtb17											ENSG00000116809	ZBTB17
ENSDARG00000102234	si:ch211-71n6.4	1.61159	1.56136		1.6678		1.89126	1.69539	2.01161	2.19067	1.61434
ENSDARG00000098880	pclob											ENSG00000186472	PCLO
ENSDARG00000077920	CSMD3 (1 of many)	2.43445		2.20821			2.50303			2.22904		ENSG00000164796	CSMD3
ENSDARG00000062465	pgap1									1.52676		ENSG00000197121	PGAP1
ENSDARG00000031095	veph1	1.80185					1.76561		1.60603	1.92811		ENSG00000197415	VEPH1
ENSDARG00000012982	nf1a											ENSG00000196712	NF1
ENSDARG00000099448	sh3d21											ENSG00000214193	SH3D21
ENSDARG00000104568	BX571715.1						1.56364			1.9375
ENSDARG00000075759	samd4a								1.61163	1.64177		ENSG00000020577	SAMD4A
ENSDARG00000039325	pmepa1
ENSDARG00000026908	tmed2											ENSG00000086598	TMED2
ENSDARG00000077092	elk4				1.74944		1.68205			1.56456		ENSG00000158711	ELK4
ENSDARG00000016439	slc7a1	1.67814	1.80543		1.90262		1.60743		2.32119	2.08218	1.71049	ENSG00000139514	SLC7A1
ENSDARG00000105178	erc2	1.98086					1.6074			2.07732		ENSG00000187672	ERC2
ENSDARG00000101933	CELF6	1.52099	1.70054		1.77233		1.50597				1.86763	ENSG00000140488	CELF6
ENSDARG00000103906	pcdh2ab10									1.69173
ENSDARG00000100260	ENSDARG00000100260											ENSG00000130193	THEM6
ENSDARG00000099265	slc7a5									1.74661		ENSG00000103257	SLC7A5
ENSDARG00000057352	slc25a29	2.56901	3.61293		3.08614		3.40985	2.65765	3.74774	4.00971		ENSG00000197119	SLC25A29
ENSDARG00000070108	dek											ENSG00000124795	DEK
ENSDARG00000071331	ryr3											ENSG00000198838	RYR3
ENSDARG00000077915	lmx1al	1.95852	1.68923		1.55928		1.63139			1.90907
ENSDARG00000088842	KCNB2	2.34911	2.24183		2.74394		2.86474	2.47282	2.58722	2.8909	2.15077	ENSG00000182674	KCNB2
ENSDARG00000079850	dchs1b											ENSG00000166341	DCHS1
ENSDARG00000012005	mob2b											ENSG00000182208	MOB2
ENSDARG00000078902	rims1b											ENSG00000079841	RIMS1
ENSDARG00000054458	slmapa											ENSG00000163681	SLMAP
ENSDARG00000089640	si:dkey-117n7.5		-1.62509						-1.61081
ENSDARG00000108082	AL954144.2	1.93325	2.06073		1.90435		2.07252		1.83809	1.82049
ENSDARG00000033327	unc5b											ENSG00000107731	UNC5B
ENSDARG00000079484	kcnt1
ENSDARG00000012019	glra1											ENSG00000145888	GLRA1
ENSDARG00000102315	RAI2
ENSDARG00000100115	dnah1											ENSG00000114841	DNAH1
ENSDARG00000101644	ARHGEF17											ENSG00000110237	ARHGEF17
ENSDARG00000043687	ENSDARG00000043687											ENSG00000112167	SAYSD1
ENSDARG00000028393	daam2	1.63542			1.60405		1.84309		2.18832	1.96154		ENSG00000146122	DAAM2
ENSDARG00000039577	ptk2bb											ENSG00000120899	PTK2B
ENSDARG00000060106	crb2a											ENSG00000148204	CRB2
ENSDARG00000071904	pcdh2ab1											ENSG00000081842	PCDHA1
ENSDARG00000012816	dia1a											ENSG00000181744	C3orf58
ENSDARG00000062854	sdk1b											ENSG00000146555	SDK1
ENSDARG00000075793	prex1											ENSG00000124126	PREX1
ENSDARG00000077994	b4galt2	1.57473								1.50268		ENSG00000117411	B4GALT2
ENSDARG00000056535	pla2g4f.1											ENSG00000168907	PLA2G4F
ENSDARG00000071629	BX511034.1				1.61133			1.86028	1.50359	1.98069
ENSDARG00000019963	sfxn1	1.67457			1.81719		1.49711	1.84099		2.02161		ENSG00000164466	SFXN1
ENSDARG00000079491	kcna3a	1.57865			1.57925		1.70916			1.53449
ENSDARG00000079811	micall1a
ENSDARG00000098509	BX005286.1	2.44969	2.13482				2.35263			2.57177
ENSDARG00000104375	sec24a											ENSG00000113615	SEC24A
ENSDARG00000103739	bahcc1a											ENSG00000266074	BAHCC1
ENSDARG00000101670	kntc1											ENSG00000184445	KNTC1
ENSDARG00000090387	onecut2	3.91027	3.35206		3.82267		3.86133		3.50648	4.0116		ENSG00000119547	ONECUT2
ENSDARG00000011373	mknk2a											ENSG00000099875	MKNK2
ENSDARG00000071594	TIMM21											ENSG00000075336	TIMM21
ENSDARG00000102435	plekhf1			2.26358								ENSG00000166289	PLEKHF1
ENSDARG00000014098	pkd2											ENSG00000118762	PKD2
ENSDARG00000087762	rab27b											ENSG00000041353	RAB27B
ENSDARG00000024492	col9a2											ENSG00000049089	COL9A2
ENSDARG00000002131	celf2											ENSG00000048740	CELF2
ENSDARG00000007461	srgap1a											ENSG00000196935	SRGAP1
ENSDARG00000018065	ntm				1.52928
ENSDARG00000028469	rps6ka2	1.57552			1.61084							ENSG00000071242	RPS6KA2
ENSDARG00000058801	rev3l											ENSG00000009413	REV3L
ENSDARG00000075111	als2a											ENSG00000003393	ALS2
ENSDARG00000104254	cpne4b	2.38754			2.53699		2.68438	2.55925		1.89602	2.26723	ENSG00000196353	CPNE4
ENSDARG00000106777	CABZ01078706.1	1.81806	1.55621		1.86345		1.97314		1.97618	2.23685
ENSDARG00000074558	cntnap2b											ENSG00000174469	CNTNAP2
ENSDARG00000069954	kcnq5a											ENSG00000185760	KCNQ5
ENSDARG00000102761	zbtb42	2.31732	2.43711		2.67154		2.39287		2.25665	2.65466
ENSDARG00000076768	reps2											ENSG00000169891	REPS2
ENSDARG00000099487	si:ch73-233f7.7	1.53765			1.64736		1.55691			1.58782		ENSG00000240184	PCDHGC3
ENSDARG00000013777	ppp1r13l											ENSG00000104881	PPP1R13L
ENSDARG00000062812	glsa											ENSG00000115419	GLS
ENSDARG00000107931	BX324003.5
ENSDARG00000036445	serpinh2
ENSDARG00000004931	slc8a3	1.59238							1.70453	1.75989		ENSG00000100678	SLC8A3
ENSDARG00000051920	nsmaf											ENSG00000035681	NSMAF
ENSDARG00000057903	si:ch211-266g18.10	1.56285	1.63444		1.78359		1.49314		2.43776	2.36335
ENSDARG00000058644	dnajb2											ENSG00000135924	DNAJB2
ENSDARG00000059557	xylt2											ENSG00000015532	XYLT2
ENSDARG00000070227	nhsa						1.56622					ENSG00000188158	NHS
ENSDARG00000076484	stab1											ENSG00000010327	STAB1
ENSDARG00000093136	BX936323.1	2.48912	2.12002		3.09409		2.61082		2.1235	2.58686	2.70368
ENSDARG00000094704	bcl2a									1.49832		ENSG00000171791	BCL2
ENSDARG00000094752	rpe65b											ENSG00000116745	RPE65
ENSDARG00000100108	cul3b											ENSG00000036257	CUL3
ENSDARG00000016396	fam219aa				1.70983		1.94264		1.70568	1.98535
ENSDARG00000063555	ENSDARG00000063555	1.49356			1.61634		1.70027			1.82166
ENSDARG00000101203	znf513b								1.49347			ENSG00000163795	ZNF513
ENSDARG00000010042	dnm1a											ENSG00000106976	DNM1
ENSDARG00000070919	cpne5b	1.77547					1.96964			1.67416		ENSG00000124772	CPNE5
ENSDARG00000075456	pik3ca											ENSG00000121879	PIK3CA
ENSDARG00000044622	polq											ENSG00000051341	POLQ
ENSDARG00000007869	ehd3											ENSG00000013016	EHD3
ENSDARG00000061541	unc5db						1.53927					ENSG00000156687	UNC5D
ENSDARG00000103535	SORCS3	2.55781						2.73095		2.26544		ENSG00000156395	SORCS3
ENSDARG00000034211	ENSDARG00000034211											ENSG00000162909	CAPN2
ENSDARG00000011422	ryr1a											ENSG00000196218	RYR1
ENSDARG00000042544	degs2											ENSG00000168350	DEGS2
ENSDARG00000052030	akr1a1b											ENSG00000117448	AKR1A1
ENSDARG00000012504	rlbp1a		-2.0945	-1.77081					-2.04158	-2.70837		ENSG00000140522	RLBP1
ENSDARG00000061549	foxo1b	1.55589			1.58964		1.54038			1.61429		ENSG00000150907	FOXO1
ENSDARG00000106706	CABZ01064069.1	1.72907			1.80766		2.28216			1.67056
ENSDARG00000077559	CABZ01052290.1											ENSG00000111912	NCOA7
ENSDARG00000041381	arntl2											ENSG00000029153	ARNTL2
ENSDARG00000063253	hecw2b											ENSG00000138411	HECW2
ENSDARG00000068104	CABZ01041002.1
ENSDARG00000059712	slc19a2				1.71048		1.81878		1.69291	1.98087		ENSG00000117479	SLC19A2
ENSDARG00000094281	si:ch73-196i15.3
ENSDARG00000045094	si:dkey-222b8.1		1.75794							2.43928
ENSDARG00000036863	MYO1D											ENSG00000176658	MYO1D
ENSDARG00000039726	ENSDARG00000039726											ENSG00000177752	YIPF7
ENSDARG00000018109	mafga	3.27709			3.40271		3.66474			4.15319		ENSG00000197063	MAFG
ENSDARG00000069970	lingo2b											ENSG00000174482	LINGO2
ENSDARG00000099031	scn4ba	1.69172	1.7499		1.75948		2.04652	1.83936	1.65735	2.42554	1.72557	ENSG00000177098	SCN4B
ENSDARG00000005356	tyro3								1.60752			ENSG00000092445	TYRO3
ENSDARG00000015472	gpc4											ENSG00000076716	GPC4
ENSDARG00000021895	disc1											ENSG00000162946	DISC1
ENSDARG00000052766	EVI5L	1.94253			1.85054		1.68553			2.32		ENSG00000142459	EVI5L
ENSDARG00000075580	lrch2	1.82739					1.64614			1.56234		ENSG00000130224	LRCH2
ENSDARG00000100280	znfx1		1.62353						1.75583			ENSG00000124201	ZNFX1
ENSDARG00000012341	capn9											ENSG00000135773	CAPN9
ENSDARG00000054978	kifc3											ENSG00000140859	KIFC3
ENSDARG00000104550	clcn2b									1.49832		ENSG00000114859	CLCN2
ENSDARG00000079161	bsnb											ENSG00000164061	BSN
ENSDARG00000069775	fbxo40.1											ENSG00000163833	FBXO40
ENSDARG00000023914	mark4a											ENSG00000007047	MARK4
ENSDARG00000087657	fasn		1.82338							2.2348		ENSG00000169710	FASN
ENSDARG00000012534	slc6a6a											ENSG00000131389	SLC6A6
ENSDARG00000071469	znf618											ENSG00000157657	ZNF618
ENSDARG00000075505	PTGFRN											ENSG00000134247	PTGFRN
ENSDARG00000078261	nphp3											ENSG00000113971	NPHP3
ENSDARG00000038121	si:ch211-13k12.2											ENSG00000128886	ELL3
ENSDARG00000030263	mfsd2b											ENSG00000205639	MFSD2B
ENSDARG00000051762	ENSDARG00000051762											ENSG00000140403	DNAJA4
ENSDARG00000098801	sbno2a	3.12898	2.96719	2.77379	3.20685		3.29932		3.27412	3.48666		ENSG00000064932	SBNO2
ENSDARG00000107321	CU929120.1	2.61966					3.31526			2.4632
ENSDARG00000009194	col16a1											ENSG00000084636	COL16A1
ENSDARG00000038308	ykt6											ENSG00000106636	YKT6
ENSDARG00000104793	dgke											ENSG00000153933	DGKE
ENSDARG00000060610	pcdh7b											ENSG00000169851	PCDH7
ENSDARG00000087558	si:ch73-105b23.1	2.22622	1.92869		2.01518		1.94768			1.99292
ENSDARG00000062550	rc3h1a									1.7783		ENSG00000135870	RC3H1
ENSDARG00000017316	bag5											ENSG00000166170	BAG5
ENSDARG00000031683	fosab		1.99189	1.93916					1.49748			ENSG00000170345	FOS
ENSDARG00000060246	slc16a6b											ENSG00000108932	SLC16A6
ENSDARG00000025703	dmgdh											ENSG00000132837	DMGDH
ENSDARG00000042807	slc16a4											ENSG00000168679	SLC16A4
ENSDARG00000004782	fgfr3											ENSG00000068078	FGFR3
ENSDARG00000070228	cdk6											ENSG00000105810	CDK6
ENSDARG00000045528	fgd6											ENSG00000180263	FGD6
ENSDARG00000007727	rgl2
ENSDARG00000016875	gys1											ENSG00000104812	GYS1
ENSDARG00000071233	zgc:158254
ENSDARG00000077275	crispld1a											ENSG00000121005	CRISPLD1
ENSDARG00000012196	fer	1.4958			1.62898		1.61818		1.61906	1.71307		ENSG00000151422	FER
ENSDARG00000040190	qdpra
ENSDARG00000068370	ralgps1						1.71778					ENSG00000136828	RALGPS1
ENSDARG00000017525	ccnt1											ENSG00000129315	CCNT1
ENSDARG00000062942	kcna1a											ENSG00000111262	KCNA1
ENSDARG00000008727	ranbp3a						1.69533		1.52258	2.02255		ENSG00000031823	RANBP3
ENSDARG00000099465	rnf213a											ENSG00000173821	RNF213
ENSDARG00000105212	cfhl1								-1.5311	-1.81396
ENSDARG00000102153	nrp1a											ENSG00000099250	NRP1
ENSDARG00000079326	cabin1											ENSG00000099991	CABIN1
ENSDARG00000005095	glcea								-1.49392			ENSG00000138604	GLCE
ENSDARG00000002644	rgs5a											ENSG00000143248	RGS5
ENSDARG00000043323	lnx1											ENSG00000072201	LNX1
ENSDARG00000043527	plpp6											ENSG00000205808	PLPP6
ENSDARG00000076787	angpt4											ENSG00000101280	ANGPT4
ENSDARG00000098821	sec14l1											ENSG00000129657	SEC14L1
ENSDARG00000099814	FBXO46											ENSG00000177051	FBXO46
ENSDARG00000019945	ptprdb
ENSDARG00000060165	dnah7								1.68918			ENSG00000118997	DNAH7
ENSDARG00000102311	BX572103.2
ENSDARG00000002084	lamb2											ENSG00000172037	LAMB2
ENSDARG00000014727	acox1											ENSG00000161533	ACOX1
ENSDARG00000032116	cnot7											ENSG00000198791	CNOT7
ENSDARG00000067912	MAN1C1				1.74922		1.69379					ENSG00000117643	MAN1C1
ENSDARG00000004282	zgc:77375
ENSDARG00000092609	aup1											ENSG00000115307	AUP1
ENSDARG00000104791	CABZ01077956.1	-1.97253		-1.91106
ENSDARG00000106600	CABZ01028775.1	6.45725	6.01577				6.74701		6.89697	6.30417
ENSDARG00000060482	mid1	1.72928			1.50875							ENSG00000101871	MID1
ENSDARG00000105344	pkd1l2a
ENSDARG00000016460	fut9a											ENSG00000172461	FUT9
ENSDARG00000020611	si:ch211-160d20.3											ENSG00000160392	C19orf47
ENSDARG00000055292	atg9b											ENSG00000181652	ATG9B
ENSDARG00000058693	cast											ENSG00000153113	CAST
ENSDARG00000070603	hspa12a											ENSG00000165868	HSPA12A
ENSDARG00000006220	ugt1ab		2.27933	2.08266						1.79624	2.01265	ENSG00000167165	UGT1A1
ENSDARG00000027495	elovl4b		-2.75275	-1.91577					-1.66282	-2.44578		ENSG00000118402	ELOVL4
ENSDARG00000053561	ms4a17a.11		1.49096	1.78505
ENSDARG00000061081	arpp21		2.70056	1.95476					2.57919
ENSDARG00000062374	leng9		1.50377							1.88685		ENSG00000275183	LENG9
ENSDARG00000097613	igfn1.3		-3.79104	-2.27615					-1.76774	-2.65631		ENSG00000163395	IGFN1
ENSDARG00000007823	atf3		3.41756						2.17988	3.24549		ENSG00000162772	ATF3
ENSDARG00000099351	igfbp1a		3.48007	2.30269					2.5132	3.12646		ENSG00000146678	IGFBP1
ENSDARG00000059824	soat2		-3.41542	-2.39762					-2.2945	-4.25828	-1.63425	ENSG00000167780	SOAT2
ENSDARG00000030215	matn1		-4.24985	-3.4054	-1.8619				-2.66109	-3.3937		ENSG00000162510	MATN1
ENSDARG00000025903	lgals9l1		2.7803	1.69365						2.57082	2.2228	ENSG00000168961	LGALS9
ENSDARG00000103347	cyp2aa3		-1.83693
ENSDARG00000038296	tmem86b		4.47412	1.68682						5.303	1.82331	ENSG00000180089	TMEM86B
ENSDARG00000007344	tcap		6.19526	4.89009					4.55756	3.67978	4.34506	ENSG00000173991	TCAP
ENSDARG00000030844	klf11a		-1.94253							-1.60934		ENSG00000172059	KLF11
ENSDARG00000056795	serpine1		2.71511	1.76569					2.01552			ENSG00000106366	SERPINE1
ENSDARG00000026611	socs3b		2.2535	1.97201					2.38653			ENSG00000184557	SOCS3
ENSDARG00000089697	nfe2l2b		2.88976	1.53575						3.0742
ENSDARG00000010658	insig1		1.55142							1.94321		ENSG00000186480	INSIG1
ENSDARG00000069093	col2a1a											ENSG00000139219	COL2A1
ENSDARG00000033666	pi4k2a											ENSG00000155252	PI4K2A
ENSDARG00000104693	il6st		1.8985						1.887			ENSG00000134352	IL6ST
ENSDARG00000090352	CR855311.1		2.7373	4.30149					2.57196
ENSDARG00000026513	hoxb6b		-2.38108
ENSDARG00000042641	cyp51		1.61832							2.45084		ENSG00000001630	CYP51A1
ENSDARG00000074904	si:ch211-253b8.5		2.17359						1.90898			ENSG00000244274	DBNDD2
ENSDARG00000001953	pfkfb3		1.54037									ENSG00000170525	PFKFB3
ENSDARG00000045661	irf7		3.66911	1.97251						4.28411		ENSG00000185507	IRF7
ENSDARG00000017444	hal		2.62441							3.22217		ENSG00000084110	HAL
ENSDARG00000076624	ptprb		-1.56986									ENSG00000127329	PTPRB
ENSDARG00000010434	clu		2.06067	1.87236					3.44009			ENSG00000120885	CLU
ENSDARG00000037921	gng13b		-2.01842	-1.82782					-1.8434	-2.25472		ENSG00000127588	GNG13
ENSDARG00000025428	socs3a		3.7264	3.39229					3.68592	1.56253		ENSG00000184557	SOCS3
ENSDARG00000054196	slc38a8b		2.1767									ENSG00000166558	SLC38A8
ENSDARG00000016188	ENSDARG00000016188		1.8596						1.86336			ENSG00000064932	SBNO2
ENSDARG00000038025	cbx7a		3.91463	3.57014					4.65091	1.85155		ENSG00000100307	CBX7
ENSDARG00000056950	epyc											ENSG00000083782	EPYC
ENSDARG00000104472	si:ch211-39i2.2		3.1477						2.3741	3.06464
ENSDARG00000039486	bag3		1.78543						1.57782			ENSG00000151929	BAG3
ENSDARG00000060927	si:ch211-136a13.1		1.83474
ENSDARG00000030108	sec22ba		1.74476							1.89648		ENSG00000265808	SEC22B
ENSDARG00000054030	hoxb5b		-2.05303
ENSDARG00000016200	trib3		1.66596							1.69526		ENSG00000101255	TRIB3
ENSDARG00000077785	atf5b		2.42471							2.4785		ENSG00000169136	ATF5
ENSDARG00000104370	esm1		2.16745	1.67941						2.20592		ENSG00000164283	ESM1
ENSDARG00000016375	asns								1.64385	1.71841		ENSG00000070669	ASNS
ENSDARG00000103457	spg20b		1.62896							2.24053		ENSG00000133104	SPART
ENSDARG00000016733	psat1		1.6858						1.50821	2.01501		ENSG00000135069	PSAT1
ENSDARG00000025338	hagh		1.55292							1.78386		ENSG00000063854	HAGH
ENSDARG00000004358	gnb3a		-3.64647	-3.87924					-3.13723	-4.17033		ENSG00000111664	GNB3
ENSDARG00000105208	ENSDARG00000105208									1.9302		ENSG00000213996	TM6SF2
ENSDARG00000087956	she											ENSG00000169291	SHE
ENSDARG00000094946	si:ch211-132b12.2		-2.25578
ENSDARG00000069375	zgc:162608		3.26225	1.84255						2.90405
ENSDARG00000015355	fosl1a		5.50372	3.43147					4.78986	2.92545		ENSG00000175592	FOSL1
ENSDARG00000029476	ldlra		1.5944									ENSG00000130164	LDLR
ENSDARG00000039269	arg2		2.12203							2.28486		ENSG00000081181	ARG2
ENSDARG00000040284	si:dkey-79d12.5		3.02708						1.82832	2.07649
ENSDARG00000063223	arl14		2.69191	1.66207					2.64226			ENSG00000179674	ARL14
ENSDARG00000075261	timp2b		3.06792	2.35301					3.96168			ENSG00000035862	TIMP2
ENSDARG00000038424	si:dkey-8k3.2		1.797	1.60794
ENSDARG00000038378	sagb		-2.81722						-2.25223	-2.19713		ENSG00000130561	SAG
ENSDARG00000040623	fosl2		2.04906	1.68789					2.35788			ENSG00000075426	FOSL2
ENSDARG00000056292	vsx1		-1.67662	-1.56203					-2.29862	-2.12614		ENSG00000100987	VSX1
ENSDARG00000037121	mat2ab		2.885	1.88994					2.72166	3.60614		ENSG00000168906	MAT2A
ENSDARG00000075014	sqstm1		1.94291						1.66361			ENSG00000161011	SQSTM1
ENSDARG00000053544	hspa4l											ENSG00000164070	HSPA4L
ENSDARG00000070669	cxcr3.3		1.90643							1.78152
ENSDARG00000029761	mpp6b											ENSG00000105926	MPP6
ENSDARG00000057113	c6		1.54289	1.68116					1.85045			ENSG00000039537	C6
ENSDARG00000069817	crygm2d8		-2.20181							-2.20305
ENSDARG00000004402	elovl6		1.65446							1.69377		ENSG00000170522	ELOVL6
ENSDARG00000053364	pax10		-2.10282	-1.68887					-2.31508	-2.49265
ENSDARG00000098392	si:ch73-28h20.1		-1.86894	-1.86691					-1.65324	-2.13373
ENSDARG00000099819	sb:cb1058		1.78092							2.13172
ENSDARG00000035852	cart3		3.61534	3.70593					2.72297
ENSDARG00000057633	cxcr4a		1.87703							1.62625		ENSG00000121966	CXCR4
ENSDARG00000007671	ghrb											ENSG00000112964	GHR
ENSDARG00000036073	cebpg											ENSG00000153879	CEBPG
ENSDARG00000099299	si:ch1073-83n3.2		-2.30795						-1.83378	-1.89173
ENSDARG00000033760	pmelb											ENSG00000185664	PMEL
ENSDARG00000100339	arf4b		6.28512	3.50195					5.41175	5.01413
ENSDARG00000018566	flnca		2.11447						1.69459			ENSG00000128591	FLNC
ENSDARG00000060977	zgc:153018
ENSDARG00000090914	si:ch211-117k10.3
ENSDARG00000056680	stc2a		2.02274							2.53456		ENSG00000113739	STC2
ENSDARG00000060893	col8a2		-2.04143	-1.86742					-1.86046	-1.51288		ENSG00000171812	COL8A2
ENSDARG00000056985	tpte											ENSG00000132958	TPTE
ENSDARG00000012694	c3a.1											ENSG00000125730	C3
ENSDARG00000074210	zgc:110286		4.99614	3.13623					4.3174	4.22146
ENSDARG00000042332	plin2		2.24603							3.03924		ENSG00000147872	PLIN2
ENSDARG00000053483	zgc:113054
ENSDARG00000001910	rorab								-1.50374
ENSDARG00000057687	sbk3		-2.38279
ENSDARG00000022303	higd1a		2.0056						2.2821	2.40703		ENSG00000181061	HIGD1A
ENSDARG00000038894	tmx3		-2.40515	-1.60516					-1.97033	-2.46473		ENSG00000166479	TMX3
ENSDARG00000055192	zgc:136930		-2.12541
ENSDARG00000105562	si:dkey-23i12.7		5.01766	3.96487					3.88478	3.44183		ENSG00000168062	BATF2
ENSDARG00000044982	dhrs3a		-1.62462									ENSG00000162496	DHRS3
ENSDARG00000045089	si:ch211-270n8.1		-3.37373							-2.61141	-1.6381	ENSG00000132693	APCS
ENSDARG00000074378	junba		2.17071	1.81705					1.81669			ENSG00000171223	JUNB
ENSDARG00000010946	cbsb									1.54499		ENSG00000160200	CBS
ENSDARG00000042816	mmp9		3.52004	4.38481					3.53957			ENSG00000100985	MMP9
ENSDARG00000055876	msmo1		1.7536							2.9346		ENSG00000052802	MSMO1
ENSDARG00000091234	si:ch73-335l21.4		4.22812	2.40693					2.17464	2.30804
ENSDARG00000069415	col17a1a											ENSG00000065618	COL17A1
ENSDARG00000102393	arl3l1		-2.18483	-1.73881					-2.3384	-2.48645
ENSDARG00000068096	atf5a		1.95617							1.98602		ENSG00000169136	ATF5
ENSDARG00000040890	fdps									1.56716		ENSG00000160752	FDPS
ENSDARG00000086374	isg15		3.91328	2.37167					5.50555	4.49325		ENSG00000187608	ISG15
ENSDARG00000000551	slc1a4		1.58514							1.76822		ENSG00000115902	SLC1A4
ENSDARG00000006526	fn1b		1.86608	2.0801					2.23661			ENSG00000115414	FN1
ENSDARG00000019532	fads2		2.64512							2.92598		ENSG00000134824	FADS1
ENSDARG00000037285	mipa											ENSG00000135517	MIP
ENSDARG00000021287	zgc:91909
ENSDARG00000051956	isca1		1.50477							1.68799		ENSG00000135070	ISCA1
ENSDARG00000053853	slc13a2											ENSG00000007216	SLC13A2
ENSDARG00000056196	slc2a2									-1.80346		ENSG00000163581	SLC2A2
ENSDARG00000103775	ENSDARG00000103775											ENSG00000137801	THBS1
ENSDARG00000014059	cldn5b											ENSG00000184113	CLDN5
ENSDARG00000031616	g6pca.1									2.1974		ENSG00000131482	G6PC
ENSDARG00000055278	cfb											ENSG00000243649	CFB
ENSDARG00000099491	tmem176l.1
ENSDARG00000013057	hoxb5a
ENSDARG00000088181	mpped1		-1.67435						-1.92075			ENSG00000186732	MPPED1
ENSDARG00000061977	ppfibp2a											ENSG00000166387	PPFIBP2
ENSDARG00000002405	si:ch211-225b11.1
ENSDARG00000075045	cxcl18b		3.63653	3.21783					3.04328
ENSDARG00000053467	gtpbp1		1.55654									ENSG00000100226	GTPBP1
ENSDARG00000090557	MFAP4 (1 of many)		2.30757							1.79684		ENSG00000166482	MFAP4
ENSDARG00000039232	dusp8b
ENSDARG00000062487	si:dkey-6n6.1		-1.84834
ENSDARG00000094316	si:rp71-80o10.4		3.73871	1.98642						4.21858
ENSDARG00000070012	sesn2		2.2351	1.50587					1.60746	2.54352		ENSG00000130766	SESN2
ENSDARG00000004539	ptgs2a											ENSG00000073756	PTGS2
ENSDARG00000099411	zgc:158343
ENSDARG00000069548	zgc:162780		-1.57585
ENSDARG00000076192	ankrd1b		-1.69825	-1.53901								ENSG00000148677	ANKRD1
ENSDARG00000031044	lipg											ENSG00000101670	LIPG
ENSDARG00000067607	srebf1		2.33176							2.7066		ENSG00000072310	SREBF1
ENSDARG00000040985	itgbl1											ENSG00000198542	ITGBL1
ENSDARG00000061061	dpagt1		1.58644									ENSG00000172269	DPAGT1
ENSDARG00000030463	tppp3		1.7218									ENSG00000159713	TPPP3
ENSDARG00000010958	glmnb		-2.73099	-2.69345					-2.38081	-2.74239		ENSG00000174842	GLMN
ENSDARG00000070822	cnp											ENSG00000173786	CNP
ENSDARG00000002295	si:dkey-21p1.3		3.21162	2.2313					2.281		1.50952
ENSDARG00000058365	hspb8											ENSG00000152137	HSPB8
ENSDARG00000059836	ddit3		1.98223							1.98586		ENSG00000175197	DDIT3
ENSDARG00000079784	si:ch211-235o23.1									1.57735		ENSG00000165071	TMEM71
ENSDARG00000097208	ENSDARG00000097208		2.1135									ENSG00000187479	C11orf96
ENSDARG00000090873	ccl34a.4		4.68163	4.8876	2.26193				4.70948	4.90363	3.33127
ENSDARG00000011989	crx		-1.49484						-1.8254	-2.10366
ENSDARG00000011640	syt5b		-1.67065	-1.76196					-2.4422	-2.48642		ENSG00000129990	SYT5
ENSDARG00000007788	atp2b1b		-1.52393							-2.03528		ENSG00000070961	ATP2B1
ENSDARG00000102176	pla1a									1.9586		ENSG00000144837	PLA1A
ENSDARG00000026165	col11a1a											ENSG00000060718	COL11A1
ENSDARG00000035422	cyr61l1		2.13977
ENSDARG00000040528	lgals3bpb		-1.97645	-1.66455					-1.60202	-2.14815		ENSG00000108679	LGALS3BP
ENSDARG00000079651	si:ch1073-174d20.2
ENSDARG00000074745	zmp:0000000760
ENSDARG00000077069	srgn
ENSDARG00000070047	rgs4											ENSG00000117152	RGS4
ENSDARG00000059035	porb											ENSG00000127948	POR
ENSDARG00000086647	chrng		2.10986	1.81081					2.34987			ENSG00000196811	CHRNG
ENSDARG00000104773	junbb		2.13048	2.09532					2.51441			ENSG00000171223	JUNB
ENSDARG00000023861	dnase1l1l		-1.54067							-1.73237
ENSDARG00000062350	synm		2.04764						1.65355			ENSG00000182253	SYNM
ENSDARG00000102585	fam160a1b		-1.98541	-1.70981					-1.61163	-2.22964		ENSG00000164142	FAM160A1
ENSDARG00000019902	rcvrn2		-2.08774						-2.12343	-2.038
ENSDARG00000073905	ENSDARG00000073905									1.60513		ENSG00000110002	VWA5A
ENSDARG00000074791	aldh3a1									1.53897		ENSG00000072210	ALDH3A1
ENSDARG00000035891	acana											ENSG00000157766	ACAN
ENSDARG00000074850	il12rb2l
ENSDARG00000018569	tnfrsf1a		1.53706						1.50797			ENSG00000067182	TNFRSF1A
ENSDARG00000037178	zic2b											ENSG00000043355	ZIC2
ENSDARG00000107353	BX957322.3		-1.78714						-1.86193	-2.23048
ENSDARG00000100255	si:ch73-29l19.1		-2.23585	-3.21029					-2.74656	-2.53309
ENSDARG00000079946	sqlea									2.13831		ENSG00000104549	SQLE
ENSDARG00000102430	opn6a		-2.43705	-2.91748					-2.29904	-2.95245
ENSDARG00000093381	tgm2l		1.69126
ENSDARG00000090401	CABZ01020840.1		2.57113						3.09272	1.76355		ENSG00000121380	BCL2L14
ENSDARG00000089086	mustn1b		2.35971	2.13023					2.57235			ENSG00000243696	MUSTN1
ENSDARG00000060354	samd7		-1.74576						-2.13233	-2.14405		ENSG00000187033	SAMD7
ENSDARG00000013295	slc2a3a
ENSDARG00000004078	acsl4a											ENSG00000068366	ACSL4
ENSDARG00000021987	plecb											ENSG00000178209	PLEC
ENSDARG00000028618	ENSDARG00000028618											ENSG00000111057	KRT18
ENSDARG00000091111	ENSDARG00000091111		1.77877							1.71414		ENSG00000145365	TIFA
ENSDARG00000023536	nnt											ENSG00000112992	NNT
ENSDARG00000005139	hhatlb											ENSG00000010282	HHATL
ENSDARG00000037861	slc2a3b		1.98358
ENSDARG00000097855	ENSDARG00000097855											ENSG00000187699	C2orf88
ENSDARG00000018797	crygmxl1		-1.82429									ENSG00000118231	CRYGA
ENSDARG00000032242	tnnt2c								1.8797
ENSDARG00000035458	atp2a1l
ENSDARG00000018179	acvrl1											ENSG00000139567	ACVRL1
ENSDARG00000076055	rpgrip1		-2.07769	-2.42499					-1.92115	-2.0796		ENSG00000092200	RPGRIP1
ENSDARG00000031952	mb		-1.57231							-1.59062		ENSG00000198125	MB
ENSDARG00000070961	lepr											ENSG00000116678	LEPR
ENSDARG00000069282	bbc3								2.02363
ENSDARG00000069615	ckmt2a		-3.39246	-2.42142					-2.97047	-3.43549		ENSG00000131730	CKMT2
ENSDARG00000052223	rcvrna		-2.76898	-2.19688					-2.42752	-2.97748		ENSG00000109047	RCVRN
ENSDARG00000012126	zgc:109965		-2.23555	-1.93134					-2.2136	-2.8025
ENSDARG00000100564	ENSDARG00000100564									1.59267		ENSG00000120725	SIL1
ENSDARG00000045893	kctd15a											ENSG00000153885	KCTD15
ENSDARG00000002204	hspb11		2.96421	2.70596					1.61019
ENSDARG00000056938	kera											ENSG00000139330	KERA
ENSDARG00000089586	ncam3		-2.45418							-2.0735
ENSDARG00000041414	bmf2		1.92766							1.60983
ENSDARG00000043719	c3a.6											ENSG00000125730	C3
ENSDARG00000058656	desma		1.61004	1.57004								ENSG00000175084	DES
ENSDARG00000059363	tgfbr2a		1.49647									ENSG00000163513	TGFBR2
ENSDARG00000035544	etnppl											ENSG00000164089	ETNPPL
ENSDARG00000099793	cspg5b											ENSG00000114646	CSPG5
ENSDARG00000007709	adamts8a		2.03515							2.56963		ENSG00000134917	ADAMTS8
ENSDARG00000033999	cyp26a1		-1.72431									ENSG00000095596	CYP26A1
ENSDARG00000054942	lgals2a		1.77789						1.82619		1.74663	ENSG00000100097	LGALS1
ENSDARG00000070601	RASSF5											ENSG00000266094	RASSF5
ENSDARG00000021383	naalad2											ENSG00000077616	FOLH1
ENSDARG00000077341	ppp1r14c								-1.69034			ENSG00000198729	PPP1R14C
ENSDARG00000070995	inpp4ab											ENSG00000040933	INPP4A
ENSDARG00000076904	loxl5b		1.82498
ENSDARG00000012395	mmp13a		4.23145	3.46989					1.63738
ENSDARG00000052615	tnmd			-2.26995					-1.78052			ENSG00000000005	TNMD
ENSDARG00000015164	mknk2b		1.75545									ENSG00000099875	MKNK2
ENSDARG00000056027	hoxb8a											ENSG00000120068	HOXB8
ENSDARG00000015546	alpl											ENSG00000162551	ALPL
ENSDARG00000100482	pmt		1.96388	1.84448					1.61871	2.72617
ENSDARG00000073870	gdpd2											ENSG00000130055	GDPD2
ENSDARG00000095698	si:dkey-228a15.1		2.53384	2.91389					3.43586
ENSDARG00000042732	tmem189											ENSG00000124208	TMEM189
ENSDARG00000055365	si:dkey-25e12.3		2.59656	2.23011					2.25273
ENSDARG00000086173	relb											ENSG00000104856	RELB
ENSDARG00000097181	defbl3		2.73425	1.77338						2.67276
ENSDARG00000102048	slc25a43									1.50807		ENSG00000077713	SLC25A43
ENSDARG00000101669	elmod2											ENSG00000179387	ELMOD2
ENSDARG00000106550	CABZ01064941.1
ENSDARG00000006598	sgk2b								1.49403
ENSDARG00000028335	hmga1a											ENSG00000137309	HMGA1
ENSDARG00000097738	AL929222.2
ENSDARG00000004979	elovl5		1.88998							2.68955		ENSG00000012660	ELOVL5
ENSDARG00000020811	efemp2b											ENSG00000172638	EFEMP2
ENSDARG00000040627	grik1b		-2.63947	-2.09793					-2.28327	-2.42683		ENSG00000171189	GRIK1
ENSDARG00000062788	irg1l		2.21663	2.89311					2.59875
ENSDARG00000103648	znf536											ENSG00000198597	ZNF536
ENSDARG00000069335	bcl6b											ENSG00000161940	BCL6B
ENSDARG00000081534	dre-mir-181b-2		-2.64848	-2.09118					-2.73046	-2.99499
ENSDARG00000089205	si:dkey-73n8.3		1.6845
ENSDARG00000058606	sik1											ENSG00000142178	SIK1
ENSDARG00000043483	otx5									-1.72326
ENSDARG00000078674	hspb9		3.561	2.78359					1.75401		3.10718
ENSDARG00000088411	notum2
ENSDARG00000102207	CABZ01102578.1
ENSDARG00000089885	slc16a12b											ENSG00000152779	SLC16A12
ENSDARG00000093198	C3 (1 of many)		2.70738	1.6546					1.95126			ENSG00000125730	C3
ENSDARG00000052700	SLC9B2		-1.60416	-1.62672					-1.6406	-1.83255		ENSG00000164037	SLC9B1
ENSDARG00000011510	rcc2											ENSG00000179051	RCC2
ENSDARG00000042172	c7a											ENSG00000112936	C7
ENSDARG00000057504	si:dkey-202g17.3		-2.74568
ENSDARG00000058557	il11b		6.66438	5.46706					7.00989
ENSDARG00000034424	atp1b2b											ENSG00000129244	ATP1B2
ENSDARG00000036457	cacng6a											ENSG00000130433	CACNG6
ENSDARG00000092269	si:dkeyp-41f9.4		-1.88924	-2.33656					-2.57177	-2.48067
ENSDARG00000070107	six7								-1.65645
ENSDARG00000045708	adm2a		1.67763							1.79978		ENSG00000128165	ADM2
ENSDARG00000075282	irs2b											ENSG00000185950	IRS2
ENSDARG00000042188	ttc38											ENSG00000075234	TTC38
ENSDARG00000068128	ppp1r15b		2.10082							1.62231		ENSG00000158615	PPP1R15B
ENSDARG00000074331	eif4g3b											ENSG00000075151	EIF4G3
ENSDARG00000020645	slc7a3a		1.73961							1.86916		ENSG00000165349	SLC7A3
ENSDARG00000086998	ENSDARG00000086998											ENSG00000166741	INMT
ENSDARG00000100781	ENSDARG00000100781		-2.79371
ENSDARG00000039987	hivep2a											ENSG00000010818	HIVEP2
ENSDARG00000095651	hmx1								-1.77083	-1.84019		ENSG00000215612	HMX1
ENSDARG00000058695	ddr2b								-1.64521			ENSG00000162733	DDR2
ENSDARG00000099186	slc1a5											ENSG00000105281	SLC1A5
ENSDARG00000056084	igsf21b		-1.86317	-2.40546					-1.85538			ENSG00000117154	IGSF21
ENSDARG00000054288	zgc:63972
ENSDARG00000016457	irf9		1.55804						1.88303			ENSG00000213928	IRF9
ENSDARG00000107761	CABZ01070746.1		-1.51432
ENSDARG00000043796	ms4a17a.7											ENSG00000071203	MS4A12
ENSDARG00000027236	rs1a		-2.79221	-2.97221					-2.79073	-2.75877		ENSG00000102104	RS1
ENSDARG00000052271	slc22a18											ENSG00000110628	SLC22A18
ENSDARG00000056453	afap1l1b											ENSG00000157510	AFAP1L1
ENSDARG00000078527	lingo4b			-1.50518								ENSG00000213171	LINGO4
ENSDARG00000062821	slc6a15									1.82414		ENSG00000072041	SLC6A15
ENSDARG00000054616	cldni
ENSDARG00000061049	rnf182		-3.97417		-1.53296		-1.53465			-2.19091		ENSG00000180537	RNF182
ENSDARG00000053323	zgc:112285
ENSDARG00000076020	pappa2											ENSG00000116183	PAPPA2
ENSDARG00000069934	parp4								1.63436			ENSG00000102699	PARP4
ENSDARG00000040321	rx2											ENSG00000173976	RAX2
ENSDARG00000034007	prom1b			-2.16198					-1.51909	-1.54492		ENSG00000007062	PROM1
ENSDARG00000041060	lgals9l3											ENSG00000168961	LGALS9
ENSDARG00000037747	fscn1b											ENSG00000075618	FSCN1
ENSDARG00000102565	vasnb											ENSG00000168140	VASN
ENSDARG00000059404	rab43		1.90266									ENSG00000172780	RAB43
ENSDARG00000060711	sv2bb											ENSG00000185518	SV2B
ENSDARG00000029072	klf6a											ENSG00000067082	KLF6
ENSDARG00000007382	ubtd1a		-1.50297									ENSG00000165886	UBTD1
ENSDARG00000013050	abcc12		1.55729							1.87738		ENSG00000121270	ABCC11
ENSDARG00000068493	si:zfos-411a11.2		3.25685	2.51322							2.83095
ENSDARG00000017354	epha2a
ENSDARG00000031434	rcor1											ENSG00000089902	RCOR1
ENSDARG00000059279	tfap2a											ENSG00000137203	TFAP2A
ENSDARG00000077176	zgc:174888
ENSDARG00000030547	rnd1a								-1.92211			ENSG00000172602	RND1
ENSDARG00000062632	duox											ENSG00000137857	DUOX1
ENSDARG00000062661	abca4b		-1.95478	-2.40472					-2.11803	-2.52755		ENSG00000198691	ABCA4
ENSDARG00000044090	zmpste24											ENSG00000084073	ZMPSTE24
ENSDARG00000090890	cmklr1		1.8198									ENSG00000174600	CMKLR1
ENSDARG00000102501	hoxa5a											ENSG00000106004	HOXA5
ENSDARG00000010752	acsl4b
ENSDARG00000042667	klf2a											ENSG00000105610	KLF1
ENSDARG00000079302	and2			-2.27573
ENSDARG00000090635	kcnj1a.4		1.78043							1.83318		ENSG00000151704	KCNJ1
ENSDARG00000104225	ndel1b											ENSG00000166579	NDEL1
ENSDARG00000055751	fosb		3.16305						2.35647	1.97278		ENSG00000125740	FOSB
ENSDARG00000014031	abcc2									1.63464		ENSG00000023839	ABCC2
ENSDARG00000056742	crmp1											ENSG00000072832	CRMP1
ENSDARG00000068551	elovl8a		2.21146							1.89368
ENSDARG00000011683	prtfdc1											ENSG00000099256	PRTFDC1
ENSDARG00000014024	ms4a17a.4		3.83052	5.31328					5.1858	1.96306		ENSG00000071203	MS4A12
ENSDARG00000051816	aass											ENSG00000008311	AASS
ENSDARG00000086775	top1		-1.51409						-1.61636	-1.58617		ENSG00000198900	TOP1
ENSDARG00000074533	slc25a38b											ENSG00000144659	SLC25A38
ENSDARG00000102308	ttc39c											ENSG00000168234	TTC39C
ENSDARG00000023181	pcp4l1		-2.14944	-1.51958					-2.21975	-1.75258		ENSG00000248485	PCP4L1
ENSDARG00000102175	hamp		2.61827	2.69625						1.86805
ENSDARG00000098700	il1b		3.56891	4.09158								ENSG00000125538	IL1B
ENSDARG00000057706	si:ch211-137i24.10		1.70954							2.80417
ENSDARG00000070597	prelp		-1.60937	-1.56411					-2.17198			ENSG00000188783	PRELP
ENSDARG00000103519	adamts1											ENSG00000154734	ADAMTS1
ENSDARG00000074169	gpam											ENSG00000119927	GPAM
ENSDARG00000069909	HTRA2 (1 of many)											ENSG00000115317	HTRA2
ENSDARG00000070951	hmga1b											ENSG00000137309	HMGA1
ENSDARG00000104148	crebbpb
ENSDARG00000088687	crygm2d17		-1.60827							-1.63715
ENSDARG00000032705	foxg1b
ENSDARG00000043079	MMP23B											ENSG00000189409	MMP23B
ENSDARG00000071636	BX511034.2		7.22846	6.8576					7.05835	6.46114
ENSDARG00000011141	dpysl5a
ENSDARG00000093052	c6		2.94866	2.54341					2.86754	1.5346		ENSG00000039537	C6
ENSDARG00000055527	cmn
ENSDARG00000101423	cyp2y3											ENSG00000108242	CYP2A13
ENSDARG00000040118	zgc:113232
ENSDARG00000077231	vwf		-2.52299		-1.59875					-1.91389		ENSG00000110799	VWF
ENSDARG00000087663	si:ch211-248l17.3		-2.71134	-2.58979					-2.53074	-3.2274		ENSG00000161992	PRR35
ENSDARG00000078701	prdm13											ENSG00000112238	PRDM13
ENSDARG00000058160	tnfaip2b		1.52044	2.00506								ENSG00000185215	TNFAIP2
ENSDARG00000098345	mamdc2a								-1.6373			ENSG00000165072	MAMDC2
ENSDARG00000024829	tnw											ENSG00000120332	TNN
ENSDARG00000021046	rhbdd1		1.73346									ENSG00000144468	RHBDD1
ENSDARG00000044894	zgc:113307			-1.68935					-1.93283
ENSDARG00000061120	slc43a2b											ENSG00000167703	SLC43A2
ENSDARG00000073707	cnksr2b								-2.15095			ENSG00000149970	CNKSR2
ENSDARG00000101919	foxj1a											ENSG00000129654	FOXJ1
ENSDARG00000032496	pon1											ENSG00000005421	PON1
ENSDARG00000078770	ENSDARG00000078770		2.11079							2.71034		ENSG00000116906	GNPAT
ENSDARG00000101135	si:dkey-85k7.7		1.54143
ENSDARG00000009160	kmo								-2.24784			ENSG00000117009	KMO
ENSDARG00000017741	g3bp1											ENSG00000145907	G3BP1
ENSDARG00000038270	ENSDARG00000038270											ENSG00000174227	PIGG
ENSDARG00000087832	bcl3		2.80128	3.18417					3.62436	1.77214		ENSG00000069399	BCL3
ENSDARG00000069135	ppp1r15a											ENSG00000087074	PPP1R15A
ENSDARG00000105039	phka1b		-1.831							-1.50208
ENSDARG00000069295	bcl6ab											ENSG00000113916	BCL6
ENSDARG00000060668	tm4sf18											ENSG00000163762	TM4SF1
ENSDARG00000003380	ENSDARG00000003380											ENSG00000148832	PAOX
ENSDARG00000005593	rxrga
ENSDARG00000093318	si:dkey-57a22.15		-2.65246	-1.74714	-1.74836				-1.92463	-2.90787		ENSG00000118231	CRYGA
ENSDARG00000061149	nrn1lb		-5.07489	-2.77315					-3.0558	-3.20947		ENSG00000188038	NRN1L
ENSDARG00000059391	gyg1b											ENSG00000163754	GYG1
ENSDARG00000096242	si:ch211-76l23.4		-1.8597
ENSDARG00000024204	mcm3											ENSG00000112118	MCM3
ENSDARG00000040194	BX545917.1		6.11281	5.14339			4.0677		5.75986	7.15857	5.7578
ENSDARG00000077882	wisp2		1.92431									ENSG00000064205	WISP2
ENSDARG00000105693	CR354588.1
ENSDARG00000069142	aars											ENSG00000090861	AARS
ENSDARG00000052942	aspg								1.69464			ENSG00000166183	ASPG
ENSDARG00000018266	mthfd1a									-2.13524		ENSG00000100714	MTHFD1
ENSDARG00000010948	kif11											ENSG00000138160	KIF11
ENSDARG00000036809	ENSDARG00000036809											ENSG00000166825	ANPEP
ENSDARG00000002193	rho		-3.57203	-4.75801	-1.86944				-3.19831	-3.42533	-1.77215	ENSG00000163914	RHO
ENSDARG00000024631	nlrc5		2.296									ENSG00000140853	NLRC5
ENSDARG00000037514	hdac3											ENSG00000171720	HDAC3
ENSDARG00000070454	pla2g12a											ENSG00000123739	PLA2G12A
ENSDARG00000001733	gulp1a											ENSG00000144366	GULP1
ENSDARG00000096398	si:ch211-276a17.5		-2.57579						-1.59857	-1.80699		ENSG00000284638
ENSDARG00000001760	tnxba		-1.85457	-2.53174					-1.57541			ENSG00000168477	TNXB
ENSDARG00000037588	bhlhe23		-1.70921	-1.9141					-2.36693	-2.30314		ENSG00000125533	BHLHE23
ENSDARG00000086248	kcnj1a.3		2.14622							2.11834		ENSG00000151704	KCNJ1
ENSDARG00000103295	cyp3a65		2.12904	1.88515							1.71373	ENSG00000021461	CYP3A4
ENSDARG00000067701	myoz3a		2.22231							-1.74673	2.15595	ENSG00000164591	MYOZ3
ENSDARG00000078425	oat									1.6271		ENSG00000065154	OAT
ENSDARG00000062077	acsbg1		2.01129							2.6907		ENSG00000103740	ACSBG1
ENSDARG00000070426	chac1								1.54074	1.60159		ENSG00000128965	CHAC1
ENSDARG00000105411	si:ch211-113d11.5
ENSDARG00000093549	sepp1a									-2.05947		ENSG00000250722	SELENOP
ENSDARG00000099564	atoh1b
ENSDARG00000019709	rhoua		1.61215							2.09479		ENSG00000116574	RHOU
ENSDARG00000042751	riok3											ENSG00000101782	RIOK3
ENSDARG00000001994	stxbp1a											ENSG00000136854	STXBP1
ENSDARG00000045930	rbpms2a
ENSDARG00000104538	tmem184a											ENSG00000164855	TMEM184A
ENSDARG00000056248	si:dkey-183i3.5		-1.63284
ENSDARG00000099461	asb10		-1.64806									ENSG00000146926	ASB10
ENSDARG00000069826	crygm2d15		-2.11265							-2.30785
ENSDARG00000055897	zgc:154093
ENSDARG00000045904	nr2e3								-1.5124			ENSG00000278570	NR2E3
ENSDARG00000036164	cars											ENSG00000110619	CARS
ENSDARG00000015064	esrrd
ENSDARG00000028957	maff											ENSG00000185022	MAFF
ENSDARG00000039534	rrh		-2.20668	-1.89585						-1.92282		ENSG00000180245	RRH
ENSDARG00000054218	si:ch73-269m23.5		1.53128							2.3292		ENSG00000182327	GLTPD2
ENSDARG00000057738	hells											ENSG00000119969	HELLS
ENSDARG00000100056	scaf8
ENSDARG00000044754	gnrh2		3.95739							4.23502
ENSDARG00000053315	tmprss3a		2.11754	2.38844	-1.5182							ENSG00000160183	TMPRSS3
ENSDARG00000053973	fetub									-1.49393		ENSG00000090512	FETUB
ENSDARG00000012060	thbs3b											ENSG00000169231	THBS3
ENSDARG00000018259	atp1a3a											ENSG00000105409	ATP1A3
ENSDARG00000042484	tle2
ENSDARG00000098746	dhrs13l1			1.97781								ENSG00000167536	DHRS13
ENSDARG00000061481	wu:fj05g07
ENSDARG00000021154	ENSDARG00000021154											ENSG00000250799	PRODH2
ENSDARG00000078557	si:ch211-57n23.4		2.37379		1.71932				2.81652	2.70089
ENSDARG00000041645	ENSDARG00000041645											ENSG00000166535	A2ML1
ENSDARG00000061187	cbx5											ENSG00000094916	CBX5
ENSDARG00000020944	ezra											ENSG00000092820	EZR
ENSDARG00000039356	zgc:194209
ENSDARG00000099195	ier2a											ENSG00000160888	IER2
ENSDARG00000016480	slc17a7a		-2.01439						-1.78236			ENSG00000104888	SLC17A7
ENSDARG00000045257	decr2											ENSG00000242612	DECR2
ENSDARG00000038141	atf4b											ENSG00000128272	ATF4
ENSDARG00000042409	ENSDARG00000042409											ENSG00000159496	RALGDS
ENSDARG00000044251	rasgef1bb											ENSG00000138670	RASGEF1B
ENSDARG00000054804	anp32e											ENSG00000143401	ANP32E
ENSDARG00000069961	il21r.1		1.71328						1.53685			ENSG00000103522	IL21R
ENSDARG00000076144	si:ch211-74m13.3
ENSDARG00000058815	ihhb		1.57278									ENSG00000163501	IHH
ENSDARG00000077084	col28a1a											ENSG00000215018	COL28A1
ENSDARG00000002445	prdm1a											ENSG00000057657	PRDM1
ENSDARG00000040309	pxdc1b											ENSG00000168994	PXDC1
ENSDARG00000086288	scg3											ENSG00000104112	SCG3
ENSDARG00000106383	FO904959.1		1.65776
ENSDARG00000039863	lifrb											ENSG00000113594	LIFR
ENSDARG00000097795	si:ch73-195i19.3
ENSDARG00000062132	cyp4v8		-2.26941						-1.7836	-3.5227		ENSG00000145476	CYP4V2
ENSDARG00000058990	slc35a2											ENSG00000102100	SLC35A2
ENSDARG00000062686	megf11											ENSG00000157890	MEGF11
ENSDARG00000105429	AL929185.2
ENSDARG00000053995	gpank1											ENSG00000204438	GPANK1
ENSDARG00000104470	syngr2b											ENSG00000108639	SYNGR2
ENSDARG00000012506	rnpep											ENSG00000176393	RNPEP
ENSDARG00000055388	vtna											ENSG00000109072	VTN
ENSDARG00000089936	sepw2b											ENSG00000141741	MIEN1
ENSDARG00000023082	krt1-19d		-2.40633							-1.90528		ENSG00000128422	KRT10
ENSDARG00000042370	ptafr		2.15793							2.31696		ENSG00000169403	PTAFR
ENSDARG00000051981	STX3			-1.7534						-1.54164		ENSG00000166900	STX3
ENSDARG00000099972	nup153											ENSG00000124789	NUP153
ENSDARG00000102967	CT573282.1		-2.15585						-1.98769	-2.11951
ENSDARG00000010445	trabd											ENSG00000170638	TRABD
ENSDARG00000062297	soat1		1.50894							1.73994		ENSG00000057252	SOAT1
ENSDARG00000099555	foxo1a											ENSG00000150907	FOXO1
ENSDARG00000107894	CABZ01099752.1		-2.05715						-1.50338
ENSDARG00000053864	elmsan1b											ENSG00000156030	ELMSAN1
ENSDARG00000030440	rsrp1
ENSDARG00000053868	etv2											ENSG00000105672	ETV2
ENSDARG00000069715	foxi2		-1.75723									ENSG00000186766	FOXI2
ENSDARG00000106544	CABZ01102038.1
ENSDARG00000031971	kdelc1											ENSG00000134901	KDELC1
ENSDARG00000055132	lrfn4a											ENSG00000173621	LRFN4
ENSDARG00000075121	hbegfa											ENSG00000113070	HBEGF
ENSDARG00000101814	lpar3											ENSG00000171517	LPAR3
ENSDARG00000090903	creb3l3b		1.81666							1.59078		ENSG00000060566	CREB3L3
ENSDARG00000052764	chrnb3a								-1.54458			ENSG00000147432	CHRNB3
ENSDARG00000037488	canx											ENSG00000127022	CANX
ENSDARG00000053087	mthfr											ENSG00000177000	MTHFR
ENSDARG00000028098	fut9d											ENSG00000172461	FUT9
ENSDARG00000018441	heg1											ENSG00000173706	HEG1
ENSDARG00000034895	tgfb1b		1.5755									ENSG00000105329	TGFB1
ENSDARG00000104541	msh6											ENSG00000116062	MSH6
ENSDARG00000018529	lipf											ENSG00000107798	LIPA
ENSDARG00000016687	acadvl											ENSG00000072778	ACADVL
ENSDARG00000069844	irg1		3.02495	4.52199					2.55256			ENSG00000102794	ACOD1
ENSDARG00000006603	csrp1a											ENSG00000159176	CSRP1
ENSDARG00000010602	zgc:112294		-1.74108	-2.23551					-2.52337	-2.06981
ENSDARG00000019596	nrd1a											ENSG00000078618	NRDC
ENSDARG00000037859	il11a		5.01511	4.67577					5.5809
ENSDARG00000059805	slc25a38a		3.48422	2.79283					2.36495	3.53764		ENSG00000144659	SLC25A38
ENSDARG00000019307	dusp5											ENSG00000138166	DUSP5
ENSDARG00000044809	fpgs											ENSG00000136877	FPGS
ENSDARG00000104593	cyp2k18		2.00909									ENSG00000073067	CYP2W1
ENSDARG00000071048	wisp3		-1.92936	-2.00079								ENSG00000112761	WISP3
ENSDARG00000019293	tfdp1a											ENSG00000183434	TFDP1
ENSDARG00000008032	sart3											ENSG00000075856	SART3
ENSDARG00000013711	ENSDARG00000013711		1.87187							2.09611
ENSDARG00000059923	slc25a47a		1.80692						1.65107	2.81763		ENSG00000140107	SLC25A47
ENSDARG00000089717	qpct											ENSG00000115828	QPCT
ENSDARG00000036422	ntn5											ENSG00000142233	NTN5
ENSDARG00000074776	tmem154
ENSDARG00000011519	myl4											ENSG00000198336	MYL4
ENSDARG00000021242	mvp			1.52588					1.7153			ENSG00000013364	MVP
ENSDARG00000057128	hadhaa											ENSG00000084754	HADHA
ENSDARG00000045685	cntn1b											ENSG00000018236	CNTN1
ENSDARG00000058538	alcamb											ENSG00000170017	ALCAM
ENSDARG00000102755	ENSDARG00000102755											ENSG00000214595	EML6
ENSDARG00000099674	dicp3.1		1.69308							2.40587
ENSDARG00000034321	palmdb											ENSG00000099260	PALMD
ENSDARG00000054025	hoxb8b
ENSDARG00000101385	f8											ENSG00000185010	F8
ENSDARG00000012468	aacs		1.77401							2.61245		ENSG00000081760	AACS
ENSDARG00000069451	gja8a											ENSG00000121634	GJA8
ENSDARG00000058818	rbm38											ENSG00000132819	RBM38
ENSDARG00000098121	FP101882.1		1.7092						1.94807
ENSDARG00000010276	ptgs2b		2.03853									ENSG00000073756	PTGS2
ENSDARG00000056036	stxbp1b			-2.03568					-1.8819	-1.52075		ENSG00000136854	STXBP1
ENSDARG00000035602	dao.1									-2.25452		ENSG00000110887	DAO
ENSDARG00000070545	top1l											ENSG00000198900	TOP1
ENSDARG00000037894	ezh1
ENSDARG00000099802	pnp5b											ENSG00000198805	PNP
ENSDARG00000045695	myca											ENSG00000136997	MYC
ENSDARG00000074253	olig3
ENSDARG00000022904	skilb											ENSG00000136603	SKIL
ENSDARG00000002031	tox4a											ENSG00000092203	TOX4
ENSDARG00000017835	brf1a									1.91892		ENSG00000185024	BRF1
ENSDARG00000011879	foxn1		-1.65603									ENSG00000109101	FOXN1
ENSDARG00000045792	si:dkey-106n21.1
ENSDARG00000068562	rbm33a											ENSG00000184863	RBM33
ENSDARG00000030616	nfe2l1a									1.7433		ENSG00000082641	NFE2L1
ENSDARG00000052739	egf											ENSG00000138798	EGF
ENSDARG00000041078	chka											ENSG00000110721	CHKA
ENSDARG00000075931	acsl5											ENSG00000197142	ACSL5
ENSDARG00000077955	rnf6											ENSG00000127870	RNF6
ENSDARG00000074306	ctslb											ENSG00000135047	CTSL
ENSDARG00000019098	cd82a											ENSG00000085117	CD82
ENSDARG00000075564	fam13a											ENSG00000138640	FAM13A
ENSDARG00000075593	trim71											ENSG00000206557	TRIM71
ENSDARG00000058039	bhlhe22								-1.62044			ENSG00000180828	BHLHE22
ENSDARG00000016999	lin28a		1.5697						2.33736
ENSDARG00000100436	ENSDARG00000100436		2.02527						1.77674	1.50736		ENSG00000183862	CNGA2
ENSDARG00000061948	amotl2b											ENSG00000114019	AMOTL2
ENSDARG00000104672	CABZ01074397.1		1.59147						1.49908
ENSDARG00000077722	ppp2r3a											ENSG00000073711	PPP2R3A
ENSDARG00000044861	opn1lw2		-2.25431									ENSG00000102076	LOC107984055
ENSDARG00000106649	AL929493.2		1.94636						2.3193
ENSDARG00000092233	vtg1		5.72196	4.31892					5.44644
ENSDARG00000040492	mthfd1b											ENSG00000100714	MTHFD1
ENSDARG00000000796	nr4a1											ENSG00000123358	NR4A1
ENSDARG00000091006	cobl											ENSG00000106078	COBL
ENSDARG00000042539	ywhaqa											ENSG00000134308	SFN
ENSDARG00000007923	ptpn1											ENSG00000196396	PTPN1
ENSDARG00000074721	rassf9		1.69085							1.61317		ENSG00000198774	RASSF9
ENSDARG00000011370	fyna											ENSG00000010810	FYN
ENSDARG00000086332	bri3											ENSG00000164713	BRI3
ENSDARG00000012369	rdh10b											ENSG00000121039	RDH10
ENSDARG00000057099	papss1											ENSG00000138801	PAPSS1
ENSDARG00000043531	jun											ENSG00000177606	JUN
ENSDARG00000079779	radil								-1.61877			ENSG00000157927	RADIL
ENSDARG00000069478	slc13a3											ENSG00000158296	SLC13A3
ENSDARG00000028118	dscamb											ENSG00000171587	DSCAM
ENSDARG00000005359	sucla2											ENSG00000136143	SUCLA2
ENSDARG00000108852	CR381619.1		-2.4226		-2.23661	-2.59706	-1.61282		-1.88736	-2.59641	-1.82399
ENSDARG00000087741	asb14b											ENSG00000239388	ASB14
ENSDARG00000005576	mphosph8											ENSG00000196199	MPHOSPH8
ENSDARG00000076306	loxl3a		-3.29534	-1.9932					-2.85285		-2.08408
ENSDARG00000099431	med24											ENSG00000008838	MED24
ENSDARG00000036293	gnb1l											ENSG00000185838	GNB1L
ENSDARG00000052215	btr02
ENSDARG00000093193	chia.6		1.85804	1.51324						2.88734		ENSG00000085465	OVGP1
ENSDARG00000054304	homeza											ENSG00000215271	HOMEZ
ENSDARG00000101826	zwi
ENSDARG00000102058	si:dkeyp-11e3.1
ENSDARG00000054797	ENSDARG00000054797		-2.28714	-2.91279					-2.16223	-3.30317		ENSG00000160439	RDH13
ENSDARG00000077367	ntng2a											ENSG00000196358	NTNG2
ENSDARG00000021241	zgc:165604		-1.88595	-1.67702						-2.60954
ENSDARG00000045548	lepb		4.56155	4.89578					3.45853
ENSDARG00000005526	igfn1.1											ENSG00000163395	IGFN1
ENSDARG00000034801	mylka									-1.51943		ENSG00000065534	MYLK
ENSDARG00000011515	orai1a											ENSG00000276045
ENSDARG00000031483	col9a1b											ENSG00000112280	COL9A1
ENSDARG00000098528	rtn4rl1b								-1.56573			ENSG00000185924	RTN4RL1
ENSDARG00000019235	sema3aa											ENSG00000075213	SEMA3A
ENSDARG00000019195	vps9d1											ENSG00000075399	VPS9D1
ENSDARG00000007086	aqp10a		2.80453							3.97506		ENSG00000143595	AQP10
ENSDARG00000019236	gsr											ENSG00000104687	GSR
ENSDARG00000002745	tdh
ENSDARG00000042033	mettl11b											ENSG00000203740	METTL11B
ENSDARG00000052713	lrrtm1											ENSG00000162951	LRRTM1
ENSDARG00000071005	ppp1r3ca											ENSG00000119938	PPP1R3C
ENSDARG00000016573	mroh1											ENSG00000179832	MROH1
ENSDARG00000016623	si:ch211-195b13.1
ENSDARG00000040466	vil1			-2.15307								ENSG00000127831	VIL1
ENSDARG00000033144	psme2			1.85934					1.6416			ENSG00000100911	PSME2
ENSDARG00000101144	zdhhc13											ENSG00000177054	ZDHHC13
ENSDARG00000056805	plch2b		-1.52863									ENSG00000149527	PLCH2
ENSDARG00000020084	tg								2.10492	1.80848		ENSG00000042832	TG
ENSDARG00000062003	myo5b											ENSG00000167306	MYO5B
ENSDARG00000069245	matn3a											ENSG00000132031	MATN3
ENSDARG00000091902	b3gnt2b											ENSG00000170340	B3GNT2
ENSDARG00000027676	si:ch211-133l5.8
ENSDARG00000074807	tbrg4											ENSG00000136270	TBRG4
ENSDARG00000020926	creb3l3l											ENSG00000107175	CREB3
ENSDARG00000022730	aasdh											ENSG00000157426	AASDH
ENSDARG00000069420	trim23											ENSG00000113595	TRIM23
ENSDARG00000043448	itm2ca											ENSG00000135916	ITM2C
ENSDARG00000056175	scrt2								-1.59423			ENSG00000215397	SCRT2
ENSDARG00000028740	msnb		-1.50031									ENSG00000147065	MSN
ENSDARG00000090297	ldlrad2								1.61202			ENSG00000187942	LDLRAD2
ENSDARG00000096454	ap1m2											ENSG00000129354	AP1M2
ENSDARG00000104572	si:dkey-35h6.1		1.85752						1.73102	2.65346
ENSDARG00000033566	cyp17a1											ENSG00000148795	CYP17A1
ENSDARG00000020759	ef1											ENSG00000102034	ELF4
ENSDARG00000104409	tnk2b											ENSG00000061938	TNK2
ENSDARG00000091592	peli1a		1.66304
ENSDARG00000045304	mtfr1											ENSG00000066855	MTFR1
ENSDARG00000045947	si:ch211-173d10.1											ENSG00000130528	HRC
ENSDARG00000103498	epd		-1.9563	-2.3072						-2.5282
ENSDARG00000074319	sall1a											ENSG00000103449	SALL1
ENSDARG00000012942	itgb5											ENSG00000082781	ITGB5
ENSDARG00000088900	si:dkey-21o19.2								-1.64944
ENSDARG00000096319	si:ch211-239j9.1
ENSDARG00000016854	neurod2			-1.73386					-2.78673	-2.26051		ENSG00000171532	NEUROD2
ENSDARG00000023771	gabrb3
ENSDARG00000004187	zgc:122979		-1.60892	-1.8688
ENSDARG00000104173	tufm											ENSG00000178952	TUFM
ENSDARG00000070343	hoxc6a											ENSG00000197757	HOXC6
ENSDARG00000105648	si:cabz01102082.1
ENSDARG00000016718	mmp11b											ENSG00000099953	MMP11
ENSDARG00000024537	emilin1a											ENSG00000138080	EMILIN1
ENSDARG00000013134	zmp:0000000545
ENSDARG00000104919	si:ch211-153b23.3		2.16858	2.8406					2.88731
ENSDARG00000057498	habp2		-1.80847						-2.42334	-2.83775		ENSG00000148702	HABP2
ENSDARG00000004581	sel1l											ENSG00000071537	SEL1L
ENSDARG00000038489	b3gnt7											ENSG00000156966	B3GNT7
ENSDARG00000098422	FO704917.1		1.82827
ENSDARG00000020114	slc20a1a											ENSG00000144136	SLC20A1
ENSDARG00000006568	kcnmb2											ENSG00000145936	KCNMB1
ENSDARG00000076923	kazna											ENSG00000189337	KAZN
ENSDARG00000077308	gpr84		3.46898	4.15876								ENSG00000139572	GPR84
ENSDARG00000007955	iars											ENSG00000196305	IARS
ENSDARG00000104400	socs3a		2.70228						3.03995
ENSDARG00000006963	cse1l											ENSG00000124207	CSE1L
ENSDARG00000059202	tspan2b											ENSG00000134198	TSPAN2
ENSDARG00000008306	rdh5											ENSG00000135437	RDH5
ENSDARG00000025147	cd63											ENSG00000135404	CD63
ENSDARG00000070452	saraf											ENSG00000133872	SARAF
ENSDARG00000079994	AKAP13											ENSG00000170776	AKAP13
ENSDARG00000016918	ace2		2.97539		-4.52416					3.21898		ENSG00000130234	ACE2
ENSDARG00000035552	agtr2											ENSG00000180772	AGTR2
ENSDARG00000061764	ahnak											ENSG00000124942	AHNAK
ENSDARG00000043713	asf1bb											ENSG00000105011	ASF1B
ENSDARG00000102375	si:ch211-204c21.1		2.72627						2.28188	3.91968		ENSG00000145734	BDP1
ENSDARG00000077007	abcc8b		-3.20412							-1.75017		ENSG00000006071	ABCC8
ENSDARG00000100560	zfpm2b								-1.61101
ENSDARG00000071065	g6pd											ENSG00000160211	G6PD
ENSDARG00000101762	fah											ENSG00000103876	FAH
ENSDARG00000013963	mipb											ENSG00000135517	MIP
ENSDARG00000042824	nfe2l2a											ENSG00000116044	NFE2L2
ENSDARG00000103600	st8sia4											ENSG00000113532	ST8SIA4
ENSDARG00000057427	sv2ba			-1.94329								ENSG00000185518	SV2B
ENSDARG00000088048	fgf18a											ENSG00000156427	FGF18
ENSDARG00000004094	acsbg2											ENSG00000130377	ACSBG2
ENSDARG00000045936	pax6b
ENSDARG00000092204	ms4a17a.5		1.52098	1.686					2.15453			ENSG00000071203	MS4A12
ENSDARG00000103190	CABZ01067681.1
ENSDARG00000103413	zgc:109949
ENSDARG00000108195	AL928725.3		2.10404						1.74518	1.99236
ENSDARG00000098787	si:dkey-10p5.7
ENSDARG00000002507	itga10											ENSG00000143127	ITGA10
ENSDARG00000013926	slc16a9a		2.29308	1.89771					1.91114			ENSG00000165449	SLC16A9
ENSDARG00000044781	bace2											ENSG00000182240	BACE2
ENSDARG00000067673	snapc4											ENSG00000165684	SNAPC4
ENSDARG00000099435	CABZ01071639.1		-4.02168
ENSDARG00000099653	PSMD2											ENSG00000175166	PSMD2
ENSDARG00000033567	fkbp1ab
ENSDARG00000105630	alpk3b		1.63372						1.62817
ENSDARG00000097504	CR626907.3
ENSDARG00000045568	bcat1									1.70044		ENSG00000060982	BCAT1
ENSDARG00000103822	CABZ01081565.1
ENSDARG00000043581	gadd45aa								2.43983			ENSG00000116717	GADD45A
ENSDARG00000095312	si:ch211-74m13.1		3.02114				2.05548		2.58346	3.2651
ENSDARG00000018423	sulf2a
ENSDARG00000014946	angpt2a		2.46623							2.27733		ENSG00000091879	ANGPT2
ENSDARG00000044125	txn								1.59994			ENSG00000136810	TXN
ENSDARG00000056218	tnika											ENSG00000154310	TNIK
ENSDARG00000104022	gcgra											ENSG00000215644	GCGR
ENSDARG00000091119	fbxo40.2											ENSG00000163833	FBXO40
ENSDARG00000094422	si:dkey-12l12.1
ENSDARG00000058003	wfdc1											ENSG00000103175	WFDC1
ENSDARG00000015053	grip1											ENSG00000155974	GRIP1
ENSDARG00000019692	colq											ENSG00000206561	COLQ
ENSDARG00000005943	htra4		-1.56181									ENSG00000169495	HTRA4
ENSDARG00000014041	smarcad1a											ENSG00000163104	SMARCAD1
ENSDARG00000025220	sppl3											ENSG00000157837	SPPL3
ENSDARG00000059911	bbs7											ENSG00000138686	BBS7
ENSDARG00000069118	ppp2r5eb											ENSG00000154001	PPP2R5E
ENSDARG00000096762	si:dkey-61p9.11		2.317	1.89805					2.27171
ENSDARG00000035253	npr3											ENSG00000113389	NPR3
ENSDARG00000052690	arrdc3a											ENSG00000113369	ARRDC3
ENSDARG00000103503	dgat1a											ENSG00000185000	DGAT1
ENSDARG00000086490	ENSDARG00000086490											ENSG00000061656	SPAG4
ENSDARG00000074287	sptlc2b											ENSG00000100596	SPTLC2
ENSDARG00000061909	si:ch73-233f7.1								-1.64862
ENSDARG00000015915	slc25a36b											ENSG00000114120	SLC25A36
ENSDARG00000055705	f5									1.55812		ENSG00000198734	F5
ENSDARG00000079307	ENSDARG00000079307											ENSG00000274386	TMEM269
ENSDARG00000052816	shmt1											ENSG00000176974	SHMT1
ENSDARG00000012192	cant1a											ENSG00000171302	CANT1
ENSDARG00000096045	si:ch73-263o4.4											ENSG00000167720	SRR
ENSDARG00000104359	anxa1c		-1.93827		-1.59927					-1.66181	-1.62438	ENSG00000135046	ANXA1
ENSDARG00000024546	pla2g4aa											ENSG00000116711	PLA2G4A
ENSDARG00000090552	si:dkey-7j14.6			1.85664
ENSDARG00000018459	msrb2											ENSG00000148450	MSRB2
ENSDARG00000057751	zbtb47a											ENSG00000114853	ZBTB47
ENSDARG00000018397	hpca
ENSDARG00000006301	raph1a											ENSG00000173166	RAPH1
ENSDARG00000013415	lmna											ENSG00000160789	LMNA
ENSDARG00000067850	jund											ENSG00000130522	JUND
ENSDARG00000076362	tmem260											ENSG00000070269	TMEM260
ENSDARG00000007824	camta1b											ENSG00000171735	CAMTA1
ENSDARG00000027153	gabrr3a		-2.8079	-2.80317					-2.11625	-3.36057		ENSG00000183185	GABRR3
ENSDARG00000056209	myoz1a											ENSG00000177791	MYOZ1
ENSDARG00000056530	cpamd8											ENSG00000160111	CPAMD8
ENSDARG00000063578	ENSDARG00000063578											ENSG00000157680	DGKI
ENSDARG00000100969	tmprss13a											ENSG00000137747	TMPRSS13
ENSDARG00000063917	mt-nd4											ENSG00000198886	ND4
ENSDARG00000059461	mepce											ENSG00000146834	MEPCE
ENSDARG00000020133	jdp2b		2.21839	2.2914
ENSDARG00000075165	zc3h6
ENSDARG00000091009	si:ch211-28p3.4
ENSDARG00000077166	CCDC69
ENSDARG00000060113	znf395a											ENSG00000186918	ZNF395
ENSDARG00000059832	adgrb3											ENSG00000135298	ADGRB3
ENSDARG00000100133	lect1											ENSG00000136110	CNMD
ENSDARG00000056757	slc39a8									2.09293		ENSG00000138821	SLC39A8
ENSDARG00000105287	mpp1											ENSG00000130830	MPP1
ENSDARG00000040747	tm4sf4		1.95465						1.69391	2.64575		ENSG00000169903	TM4SF4
ENSDARG00000089326	arhgap20											ENSG00000137727	ARHGAP20
ENSDARG00000075985	FP243385.1		4.56547	3.16022					5.5687	3.54564
ENSDARG00000070546	msgn1		2.65252	2.55216			1.89972		3.2929	2.27388		ENSG00000151379	MSGN1
ENSDARG00000079637	alpk2											ENSG00000198796	ALPK2
ENSDARG00000103720	zgc:162730											ENSG00000128016	ZFP36
ENSDARG00000029039	zdhhc23a											ENSG00000184307	ZDHHC23
ENSDARG00000057272	slc30a9											ENSG00000014824	SLC30A9
ENSDARG00000021720	col7a1											ENSG00000114270	COL7A1
ENSDARG00000024276	pcbp4											ENSG00000090097	PCBP4
ENSDARG00000078989	alpk3a											ENSG00000136383	ALPK3
ENSDARG00000044142	acss1											ENSG00000154930	ACSS1
ENSDARG00000062831	si:ch73-22o12.1											ENSG00000073008	NECTIN2
ENSDARG00000069827	crygm2d11		-3.66032							-5.44737		ENSG00000118231	CRYGA
ENSDARG00000079457	si:dkey-57h18.1											ENSG00000185504	FAAP100
ENSDARG00000057927	rps6ka3b
ENSDARG00000101996	cxxc1a											ENSG00000154832	CXXC1
ENSDARG00000015554	zic2a											ENSG00000043355	ZIC2
ENSDARG00000019752	rom1a		-3.4612	-3.33358					-3.45261	-3.26857		ENSG00000149489	ROM1
ENSDARG00000035835	eef2k											ENSG00000103319	EEF2K
ENSDARG00000087100	ntng2b			-1.52527						-1.53313		ENSG00000196358	NTNG2
ENSDARG00000101886	pdxdc1											ENSG00000179889	LOC102724985
ENSDARG00000091131	cry1bb
ENSDARG00000002794	ENSDARG00000002794		1.75458						2.73554	2.42646
ENSDARG00000019339	uxt											ENSG00000126756	UXT
ENSDARG00000012366	fbp2											ENSG00000130957	FBP2
ENSDARG00000092166	si:dkey-147f3.8								1.55056			ENSG00000116663	FBXO44
ENSDARG00000098228	thrap3b											ENSG00000054118	THRAP3
ENSDARG00000009825	mmp23bb
ENSDARG00000028546	ndufs1											ENSG00000023228	NDUFS1
ENSDARG00000042737	slc52a3		1.5556									ENSG00000101276	SLC52A3
ENSDARG00000007743	il15l
ENSDARG00000073900	fam212b											ENSG00000197852	INKA2
ENSDARG00000074183	si:dkey-172j4.3
ENSDARG00000098809	snap91											ENSG00000065609	SNAP91
ENSDARG00000040184	syncrip											ENSG00000135316	SYNCRIP
ENSDARG00000012261	eftud2											ENSG00000108883	EFTUD2
ENSDARG00000020028	cps1											ENSG00000021826	CPS1
ENSDARG00000002758	dedd1											ENSG00000160570	DEDD2
ENSDARG00000003991	fhl2b									-1.75666		ENSG00000115641	FHL2
ENSDARG00000089399	tmem176l.2		2.12927	2.03699					2.3531
ENSDARG00000091624	zgc:172315									2.09341		ENSG00000109181	UGT2A1
ENSDARG00000078962	duox2		-1.52678									ENSG00000140254	DUOXA1
ENSDARG00000079119	si:ch211-229d2.5								-1.75708
ENSDARG00000020509	srd5a1		1.94045						1.58929	2.48518		ENSG00000145545	SRD5A1
ENSDARG00000032704	qrsl1											ENSG00000130348	QRSL1
ENSDARG00000018698	carm1											ENSG00000142453	CARM1
ENSDARG00000087697	lpl											ENSG00000175445	LPL
ENSDARG00000102335	ano1											ENSG00000131620	ANO1
ENSDARG00000037397	ssrp1a											ENSG00000149136	SSRP1
ENSDARG00000096951	CR848812.1
ENSDARG00000019541	gpt2l											ENSG00000167701	GPT
ENSDARG00000101959	etv1
ENSDARG00000043249	txndc15		1.61136	2.07158								ENSG00000125347	IRF1
ENSDARG00000038398	ENSDARG00000038398		2.43044	1.97641			1.75891		1.68199	2.76404		ENSG00000100417	PMM1
ENSDARG00000019861	fgl2a		-1.66858						-1.61297	-1.65834		ENSG00000127951	FGL2
ENSDARG00000051975	cd99											ENSG00000102181	CD99L2
ENSDARG00000023152	wdr73											ENSG00000177082	WDR73
ENSDARG00000031776	FTL (1 of many)
ENSDARG00000038834	etfdh											ENSG00000171503	ETFDH
ENSDARG00000052304	uqcrc1											ENSG00000010256	UQCRC1
ENSDARG00000102583	il4r.1
ENSDARG00000061168	dhx34											ENSG00000134815	DHX34
ENSDARG00000062517	si:ch211-107n13.1		1.62074						1.66394	1.68097		ENSG00000197245	FAM110D
ENSDARG00000070157	tgm2a											ENSG00000198959	TGM2
ENSDARG00000003877	pbrm1											ENSG00000163939	PBRM1
ENSDARG00000020956	pck2
ENSDARG00000038770	zgc:103625		-2.97437	-1.76143					-2.81328	-2.60708
ENSDARG00000017799	tgm1											ENSG00000092295	TGM1
ENSDARG00000002666	kcnj1b											ENSG00000151704	KCNJ1
ENSDARG00000055339	ENSDARG00000055339											ENSG00000027001	MIPEP
ENSDARG00000070434	rhov											ENSG00000104140	RHOV
ENSDARG00000054033	hoxb1b
ENSDARG00000105288	si:ch211-79l17.1											ENSG00000166398	KIAA0355
ENSDARG00000006901	ENSDARG00000006901											ENSG00000106624	AEBP1
ENSDARG00000012199	gpt2											ENSG00000166123	GPT2
ENSDARG00000031150	gba3		2.9153	2.37723	2.71951		2.13823	2.68015	3.18417	3.30851	2.2525	ENSG00000249948	GBA3
ENSDARG00000092488	khnyn											ENSG00000100441	KHNYN
ENSDARG00000097527	si:ch73-56d11.3		2.60393	2.65555					3.31594			ENSG00000071203	MS4A12
ENSDARG00000058944	ENSDARG00000058944		-2.29392									ENSG00000187550	SBK2
ENSDARG00000100968	si:ch211-1a19.3
ENSDARG00000020298	btg2											ENSG00000159388	BTG2
ENSDARG00000082187	dre-mir-21-1		2.11935						1.81422
ENSDARG00000090035	rtn4r											ENSG00000040608	RTN4R
ENSDARG00000031046	nr1h5		1.58789
ENSDARG00000054136	ccdc105		-1.55208									ENSG00000160994	CCDC105
ENSDARG00000054744	si:ch211-244e12.7		-3.01223	-2.20497						-5.4111
ENSDARG00000014248	pdlim3b											ENSG00000154553	PDLIM3
ENSDARG00000093019	si:dkey-83k24.5		1.61459
ENSDARG00000020761	arrdc2											ENSG00000105643	ARRDC2
ENSDARG00000073820	zgc:174917		3.76453	4.31233					2.48991
ENSDARG00000087921	plce1											ENSG00000138193	PLCE1
ENSDARG00000026634	ehmt1b											ENSG00000181090	EHMT1
ENSDARG00000040041	mcm4											ENSG00000104738	MCM4
ENSDARG00000030753	prrg4											ENSG00000135378	PRRG4
ENSDARG00000067832	zgc:136336
ENSDARG00000077407	si:dkey-184p18.2											ENSG00000141428	C18orf21
ENSDARG00000088984	cep131											ENSG00000141577	CEP131
ENSDARG00000058292	sephs1											ENSG00000086475	SEPHS1
ENSDARG00000016139	mkks											ENSG00000125863	MKKS
ENSDARG00000015349	mfge8a
ENSDARG00000056200	abcb9		1.58715									ENSG00000150967	ABCB9
ENSDARG00000061890	atp13a2											ENSG00000159363	ATP13A2
ENSDARG00000042725	cebpb			1.52012								ENSG00000172216	CEBPB
ENSDARG00000069159	rab38b
ENSDARG00000020326	tyk2								1.61921			ENSG00000105397	TYK2
ENSDARG00000044253	paqr3b											ENSG00000163291	PAQR3
ENSDARG00000043798	ms4a17a.1		2.03397	2.07369					2.54476			ENSG00000071203	MS4A12
ENSDARG00000073799	zgc:194210		1.65856
ENSDARG00000075265	plaua		2.56138									ENSG00000122861	PLAU
ENSDARG00000021975	ginm1											ENSG00000055211	GINM1
ENSDARG00000016750	abcc6a		1.63734
ENSDARG00000093048	si:ch211-158d24.4
ENSDARG00000058631	CABZ01030107.1		2.05123							2.08204
ENSDARG00000030349	cryba2a											ENSG00000163499	CRYBA2
ENSDARG00000036840	krt15											ENSG00000128422	KRT10
ENSDARG00000054753	col10a1a								-3.09948			ENSG00000123500	COL10A1
ENSDARG00000088484	kcnj1a.6											ENSG00000151704	KCNJ1
ENSDARG00000003144	pxmp2											ENSG00000176894	PXMP2
ENSDARG00000045506	gramd4b											ENSG00000075240	GRAMD4
ENSDARG00000005574	vsx2
ENSDARG00000014545	golim4b											ENSG00000173905	GOLIM4
ENSDARG00000062058	slc12a7b											ENSG00000113504	SLC12A7
ENSDARG00000013434	hira											ENSG00000100084	HIRA
ENSDARG00000036058	gnao1b											ENSG00000087258	GNAO1
ENSDARG00000061101	snx19a		-1.92682	-2.41655					-2.09149	-2.78016		ENSG00000120451	SNX19
ENSDARG00000105293	srsf4											ENSG00000116350	SRSF4
ENSDARG00000053131	irak3		2.10908	3.06449					2.0273			ENSG00000090376	IRAK3
ENSDARG00000033029	pkd1b
ENSDARG00000043309	obscna
ENSDARG00000079166	ace											ENSG00000159640	ACE
ENSDARG00000012789	plek2		1.78837						1.79977			ENSG00000100558	PLEK2
ENSDARG00000054451	loxl1											ENSG00000129038	LOXL1
ENSDARG00000097731	CR936482.1		-1.54296
ENSDARG00000041382	si:dkey-283b15.2									-1.79665
ENSDARG00000055837	arhgef1b											ENSG00000076928	ARHGEF1
ENSDARG00000075024	si:ch73-375g18.1											ENSG00000129250	KIF1C
ENSDARG00000040306	otomp
ENSDARG00000041252	gemin4											ENSG00000179409	GEMIN4
ENSDARG00000012422	col11a2											ENSG00000204248	COL11A2
ENSDARG00000056762	zgc:172079		1.54307							1.65371
ENSDARG00000020212	slc1a1											ENSG00000106688	SLC1A1
ENSDARG00000054609	slco2b1											ENSG00000137491	SLCO2B1
ENSDARG00000071288	samhd1											ENSG00000101347	SAMHD1
ENSDARG00000054848	pdk4											ENSG00000004799	PDK4
ENSDARG00000034940	slc1a7a		-1.53551	-1.76409					-1.89437			ENSG00000162383	SLC1A7
ENSDARG00000063912	mt-co3											ENSG00000198938	COX3
ENSDARG00000012945	tnfsf13b		1.52023						1.68457			ENSG00000102524	TNFSF13B
ENSDARG00000015002	cdh4											ENSG00000179242	CDH4
ENSDARG00000038618	cpt2											ENSG00000157184	CPT2
ENSDARG00000099111	zgc:175280
ENSDARG00000004199	spam1											ENSG00000106304	SPAM1
ENSDARG00000096990	si:ch1073-340i21.2
ENSDARG00000102555	si:dkey-33i11.9
ENSDARG00000023053	fam129ab											ENSG00000135842	FAM129A
ENSDARG00000036371	acta1a
ENSDARG00000059177	tax1bp3											ENSG00000213977	TAX1BP3
ENSDARG00000032238	dnm3a
ENSDARG00000031890	tcp11l1											ENSG00000176148	TCP11L1
ENSDARG00000038969	zgc:113142								2.14055
ENSDARG00000098957	BX908782.1
ENSDARG00000074506	tmem94											ENSG00000177728	TMEM94
ENSDARG00000058285	cpt1b											ENSG00000169169	CPT1B
ENSDARG00000093058	si:dkey-13i19.8											ENSG00000243317	STMP1
ENSDARG00000008237	sars											ENSG00000031698	SARS
ENSDARG00000088073	fam110b											ENSG00000169122	FAM110B
ENSDARG00000014091	osr1											ENSG00000143867	OSR1
ENSDARG00000101657	CABZ01089974.1		1.5838						1.55253	2.51476
ENSDARG00000004023	isl1											ENSG00000016082	ISL1
ENSDARG00000022712	stat3											ENSG00000168610	STAT3
ENSDARG00000095533	si:ch211-198c19.3		2.29012	2.69138					4.03718
ENSDARG00000069196	ebf1b								-1.87853			ENSG00000164330	EBF1
ENSDARG00000103858	arf4a											ENSG00000004059	ARF5
ENSDARG00000054794	plcxd3											ENSG00000182836	PLCXD3
ENSDARG00000074715	stk17a											ENSG00000164543	STK17A
ENSDARG00000060594	hadhab											ENSG00000084754	HADHA
ENSDARG00000092142	BX663503.1			-1.67861					-1.5757	-1.50365
ENSDARG00000055539	epdl2		-2.3769							-2.13712
ENSDARG00000021345	prph2l		-2.34989	-2.81821					-2.93384	-3.63051
ENSDARG00000056277	or132-5									-1.62284
ENSDARG00000070830	zgc:136858
ENSDARG00000051876	ush1c		1.78274									ENSG00000006611	USH1C
ENSDARG00000006427	fabp2											ENSG00000145384	FABP2
ENSDARG00000009822	her4.4		1.94569								1.84576
ENSDARG00000087457	ecscr											ENSG00000249751	ECSCR
ENSDARG00000032780	pigf											ENSG00000151665	PIGF
ENSDARG00000008030	myl9b
ENSDARG00000075720	il2rb		2.03938							2.39296		ENSG00000100385	IL2RB
ENSDARG00000102241	zgc:136410									-2.82011
ENSDARG00000020676	dpp3											ENSG00000254986	DPP3
ENSDARG00000036577	atp6v0cb								-1.49869			ENSG00000185883	ATP6V0C
ENSDARG00000006019	tktb											ENSG00000007350	TKTL1
ENSDARG00000004748	zgc:100868											ENSG00000005001	PRSS21
ENSDARG00000017696	diexf											ENSG00000117597	UTP25
ENSDARG00000025285	panx1a											ENSG00000110218	PANX1
ENSDARG00000075158	igdcc3											ENSG00000174498	IGDCC3
ENSDARG00000007207	cnpy2											ENSG00000144785	CNPY2
ENSDARG00000103067	adgrd2											ENSG00000180264	ADGRD2
ENSDARG00000104439	cldnd1a											ENSG00000080822	CLDND1
ENSDARG00000075446	naa25											ENSG00000111300	NAA25
ENSDARG00000100498	CABZ01079251.1									1.65953
ENSDARG00000071374	lrrtm2											ENSG00000146006	LRRTM2
ENSDARG00000061850	si:dkey-19b23.13
ENSDARG00000021372	tob1b											ENSG00000141232	TOB1
ENSDARG00000037099	irs2a											ENSG00000185950	IRS2
ENSDARG00000079564	vmhc											ENSG00000092054	MYH6
ENSDARG00000011983	zgc:136908
ENSDARG00000062040	atp8b5a
ENSDARG00000105341	si:dkey-9l20.3											ENSG00000169344	GP2
ENSDARG00000061180	vps45											ENSG00000136631	VPS45
ENSDARG00000086654	cbln11		1.88353							2.14476
ENSDARG00000018476	pak2b											ENSG00000180370	PAK2
ENSDARG00000045014	tuba2											ENSG00000123416	TUBA1B
ENSDARG00000101431	gas8											ENSG00000141013	GAS8
ENSDARG00000052470	igfbp2a											ENSG00000115457	IGFBP2
ENSDARG00000026166	emilin1b											ENSG00000138080	EMILIN1
ENSDARG00000093460	gpr52		-1.8607		-1.81803							ENSG00000203737	GPR52
ENSDARG00000099476	zgc:174863
ENSDARG00000075963	mhc1uba		2.40491							2.62685		ENSG00000010704	AZGP1
ENSDARG00000056511	arr3a		-1.60095									ENSG00000120500	ARR3
ENSDARG00000069832	sfxn4											ENSG00000183605	SFXN4
ENSDARG00000040535	ENSDARG00000040535			-1.52215								ENSG00000147408	CSGALNACT1
ENSDARG00000102294	fbxo11a
ENSDARG00000003165	nr2f6b											ENSG00000160113	NR2F6
ENSDARG00000042322	si:dkey-177p2.6
ENSDARG00000063684	ppm1h											ENSG00000111110	PPM1H
ENSDARG00000099921	tbce											ENSG00000284770	TBCE
ENSDARG00000102366	micall2a											ENSG00000164877	MICALL2
ENSDARG00000016903	wdr5											ENSG00000196363	WDR5
ENSDARG00000033443	mdm2								2.80554			ENSG00000135679	MDM2
ENSDARG00000020085	slc33a1											ENSG00000169359	SLC33A1
ENSDARG00000035556	rps6ka3a
ENSDARG00000080018	kif16bb											ENSG00000089177	KIF16B
ENSDARG00000006983	celf3b											ENSG00000159409	CELF3
ENSDARG00000016085	mbnl3											ENSG00000076770	MBNL3
ENSDARG00000079352	sap130b											ENSG00000136715	SAP130
ENSDARG00000095831	si:ch211-175f12.2		-2.01885	-2.33091					-2.33425	-1.98719
ENSDARG00000032639	cd36											ENSG00000135218	CD36
ENSDARG00000087784	si:dkeyp-110a12.4
ENSDARG00000099184	map2k6											ENSG00000108984	MAP2K6
ENSDARG00000001873	phgdh											ENSG00000092621	PHGDH
ENSDARG00000013522	pck1											ENSG00000124253	PCK1
ENSDARG00000091777	mapkap1											ENSG00000119487	MAPKAP1
ENSDARG00000101980	bmper											ENSG00000164619	BMPER
ENSDARG00000002764	miox											ENSG00000100253	MIOX
ENSDARG00000010940	BX957278.1
ENSDARG00000033234	stmn2a											ENSG00000104435	STMN2
ENSDARG00000019566	neurod1								-1.84446			ENSG00000162992	NEUROD1
ENSDARG00000041394	dnajb1b											ENSG00000132002	DNAJB1
ENSDARG00000079201	tshz2											ENSG00000182463	TSHZ2
ENSDARG00000104441	hspb7											ENSG00000173641	HSPB7
ENSDARG00000023062	cyr61											ENSG00000142871	CYR61
ENSDARG00000009629	unc119.1											ENSG00000175970	UNC119B
ENSDARG00000042489	prkrira											ENSG00000137492	THAP12
ENSDARG00000092448	CR762431.1
ENSDARG00000098738	scn4aa		-2.15151									ENSG00000007314	SCN4A
ENSDARG00000075147	lrrc38a		-1.81394						-2.02552	-1.70023		ENSG00000162494	LRRC38
ENSDARG00000014179	pfkma											ENSG00000152556	PFKM
ENSDARG00000044062	ctbp2a											ENSG00000175029	CTBP2
ENSDARG00000102624	kif22											ENSG00000079616	KIF22
ENSDARG00000028389	rab44									1.7869		ENSG00000255587	RAB44
ENSDARG00000059070	gars											ENSG00000106105	GARS
ENSDARG00000026726	anxa1a											ENSG00000135046	ANXA1
ENSDARG00000104210	ENSDARG00000104210											ENSG00000115380	EFEMP1
ENSDARG00000019856	atp1a1b											ENSG00000163399	ATP1A1
ENSDARG00000030588	slc10a1									-1.52231		ENSG00000100652	SLC10A1
ENSDARG00000076483	zgc:198241		2.23925	2.60076					1.71662
ENSDARG00000010408	igsf9b											ENSG00000085552	IGSF9
ENSDARG00000079388	agrn											ENSG00000188157	AGRN
ENSDARG00000004851	hinfp											ENSG00000172273	HINFP
ENSDARG00000043475	tagapb		-1.97909									ENSG00000164691	TAGAP
ENSDARG00000075072	rpap1											ENSG00000103932	RPAP1
ENSDARG00000015278	plxnc1											ENSG00000136040	PLXNC1
ENSDARG00000044304	prrc1											ENSG00000164244	PRRC1
ENSDARG00000075936	sugp1				-1.83955							ENSG00000105705	SUGP1
ENSDARG00000045560	mybpc1											ENSG00000196091	MYBPC1
ENSDARG00000061397	trip12											ENSG00000153827	TRIP12
ENSDARG00000051823	hyal4			-1.49729								ENSG00000106302	HYAL4
ENSDARG00000078440	ccdc88aa		-1.60722	-1.68991						-1.70349		ENSG00000115355	CCDC88A
ENSDARG00000055523	slc22a6l									-1.75965		ENSG00000149452	SLC22A10
ENSDARG00000059369	si:ch1073-15f12.3		3.14827	3.52552
ENSDARG00000070078	abcb11b											ENSG00000073734	ABCB11
ENSDARG00000021896	asap3											ENSG00000088280	ASAP3
ENSDARG00000054683	prdm8b								-1.83542
ENSDARG00000077239	si:ch211-165i18.2		2.4491						3.41522
ENSDARG00000014239	esyt1b											ENSG00000139641	ESYT1
ENSDARG00000041864	capn3a											ENSG00000092529	CAPN3
ENSDARG00000042974	sypa
ENSDARG00000036966	hsd3b7											ENSG00000099377	HSD3B7
ENSDARG00000088277	susd5											ENSG00000173705	SUSD5
ENSDARG00000042041	tal2								-1.62577			ENSG00000186051	TAL2
ENSDARG00000093764	si:dkey-145c18.5		1.60394							1.94881
ENSDARG00000055190	slc17a5											ENSG00000119899	SLC17A5
ENSDARG00000109171	CU683826.1
ENSDARG00000069388	tmem88b											ENSG00000167874	TMEM88
ENSDARG00000070769	foxg1a											ENSG00000176165	FOXG1
ENSDARG00000101246	mtmr4
ENSDARG00000037845	col9a3											ENSG00000092758	COL9A3
ENSDARG00000078093	zgc:172065		1.94107						2.194
ENSDARG00000025728	grin1b											ENSG00000176884	GRIN1
ENSDARG00000060380	coq6											ENSG00000119723	COQ6
ENSDARG00000078882	slc22a31											ENSG00000259803	SLC22A31
ENSDARG00000026482	arhgap12b											ENSG00000165322	ARHGAP12
ENSDARG00000067741	itpkcb											ENSG00000086544	ITPKC
ENSDARG00000093269	si:ch73-62b13.1
ENSDARG00000086057	CABZ01112317.1											ENSG00000004399	PLXND1
ENSDARG00000053563	ms4a17a.12		2.81184	2.61318					3.28736			ENSG00000071203	MS4A12
ENSDARG00000098753	elmo1											ENSG00000155849	ELMO1
ENSDARG00000012674	rpusd4											ENSG00000156990	RPUSD3
ENSDARG00000003970	trim35-13											ENSG00000104228	TRIM35
ENSDARG00000012314	usp25											ENSG00000155313	USP25
ENSDARG00000014324	sh2d5											ENSG00000189410	SH2D5
ENSDARG00000024540	tspan36
ENSDARG00000052011	rrad		1.62622									ENSG00000166592	RRAD
ENSDARG00000078311	dcaf6											ENSG00000143164	DCAF6
ENSDARG00000100776	syt8
ENSDARG00000068397	tns2b											ENSG00000111077	TNS2
ENSDARG00000042379	ENSDARG00000042379									-1.58362		ENSG00000189077	TMEM120A
ENSDARG00000105035	anapc2											ENSG00000176248	ANAPC2
ENSDARG00000004697	rxrgb											ENSG00000143171	RXRG
ENSDARG00000055798	heyl											ENSG00000163909	HEYL
ENSDARG00000005776	guk1b			-1.57823								ENSG00000143774	GUK1
ENSDARG00000075803	slc41a2a									1.50144		ENSG00000136052	SLC41A2
ENSDARG00000019130	plk2b											ENSG00000145632	PLK2
ENSDARG00000036344	calb2b											ENSG00000172137	CALB2
ENSDARG00000105422	si:dkey-1k23.3		6.72586	8.02308						5.21937	6.44447
ENSDARG00000098241	CABZ01081622.1											ENSG00000187741	FANCA
ENSDARG00000006640	eomesa											ENSG00000163508	EOMES
ENSDARG00000030665	ENSDARG00000030665											ENSG00000113649	TCERG1
ENSDARG00000068874	si:ch211-250m6.7		2.27785	1.74152					2.04365			ENSG00000182077	PTCHD3
ENSDARG00000074425	si:busm1-57f23.1
ENSDARG00000090654	gak											ENSG00000178950	GAK
ENSDARG00000098904	pex1											ENSG00000127980	PEX1
ENSDARG00000054543	samsn1a								-1.855			ENSG00000155307	SAMSN1
ENSDARG00000077863	mettl22											ENSG00000067365	METTL22
ENSDARG00000088711	lgals1l1		1.73087	1.76851					2.52641	2.21386	1.90621	ENSG00000100097	LGALS1
ENSDARG00000056473	chaf1b											ENSG00000159259	CHAF1B
ENSDARG00000038881	acaa2											ENSG00000167315	ACAA2
ENSDARG00000007576	crybb1l1
ENSDARG00000099002	creb5a		1.82696							1.72051
ENSDARG00000021124	cfl1											ENSG00000172757	CFL1
ENSDARG00000062915	polr3b											ENSG00000013503	POLR3B
ENSDARG00000055912	nipa2											ENSG00000140157	NIPA2
ENSDARG00000076251	irf3		2.01712						1.89867	2.59777		ENSG00000126456	IRF3
ENSDARG00000098647	ankdd1a											ENSG00000166839	ANKDD1A
ENSDARG00000079857	si:ch211-189k9.2											ENSG00000162929	KIAA1841
ENSDARG00000043806	postna											ENSG00000133110	POSTN
ENSDARG00000099128	bcl2l16
ENSDARG00000020008	vcp											ENSG00000165280	VCP
ENSDARG00000020544	rem1											ENSG00000088320	REM1
ENSDARG00000013079	tubgcp2											ENSG00000130640	TUBGCP2
ENSDARG00000101967	sult4a1											ENSG00000130540	SULT4A1
ENSDARG00000008808	eml2											ENSG00000125746	EML2
ENSDARG00000077999	si:ch1073-59l16.1
ENSDARG00000039064	st3gal7
ENSDARG00000026736	il11ra		1.71449		1.53116		1.6435		2.08506	1.72955		ENSG00000137070	IL11RA
ENSDARG00000041428	yrdc											ENSG00000196449	YRDC
ENSDARG00000055158	prox1a											ENSG00000117707	PROX1
ENSDARG00000027822	tmtops2b		2.82601	2.79994					2.62567	3.61957
ENSDARG00000102325	ehmt2											ENSG00000204371	EHMT2
ENSDARG00000019360	sec23b											ENSG00000101310	SEC23B
ENSDARG00000044815	serinc4											ENSG00000184716	SERINC4
ENSDARG00000061848	col15a1b											ENSG00000204291	COL15A1
ENSDARG00000035163	tmem136b		-2.67843						-2.13966	-3.23311		ENSG00000181264	TMEM136
ENSDARG00000005774	ddx3b											ENSG00000067048	DDX3X
ENSDARG00000012194	scp2a											ENSG00000116171	SCP2
ENSDARG00000092987	zmat4a								-1.73178			ENSG00000165061	ZMAT4
ENSDARG00000102185	PCDH8											ENSG00000136099	PCDH8
ENSDARG00000030078	glipr1b											ENSG00000173401	GLIPR1L1
ENSDARG00000061631	fbxo11a											ENSG00000138081	FBXO11
ENSDARG00000098646	mthfd2											ENSG00000065911	MTHFD2
ENSDARG00000015964	zgc:153311		-2.54713							-2.40799
ENSDARG00000020741	fga											ENSG00000171560	FGA
ENSDARG00000025218	myo5ab											ENSG00000197535	MYO5A
ENSDARG00000035565	atp6v0a2b											ENSG00000185344	ATP6V0A2
ENSDARG00000057683	mcm6											ENSG00000076003	MCM6
ENSDARG00000076594	pcdh12											ENSG00000113555	PCDH12
ENSDARG00000104396	trim25											ENSG00000121060	TRIM25
ENSDARG00000103589	gata6											ENSG00000141448	GATA6
ENSDARG00000079374	tjp1b											ENSG00000104067	TJP1
ENSDARG00000010078	nup133											ENSG00000069248	NUP133
ENSDARG00000017315	larp7											ENSG00000174720	LARP7
ENSDARG00000029057	tm6sf2											ENSG00000213996	TM6SF2
ENSDARG00000055618	acta1b
ENSDARG00000034420	irx6a								-1.95298	-1.90645		ENSG00000159387	IRX6
ENSDARG00000101485	si:ch1073-469d17.2		-1.88754						-1.86193	-1.95285
ENSDARG00000096306	si:ch1073-342h5.2											ENSG00000132128	LRRC41
ENSDARG00000107500	CABZ01102500.1
ENSDARG00000022466	clcn5b											ENSG00000171365	CLCN5
ENSDARG00000011797	fam46bb											ENSG00000158246	TENT5B
ENSDARG00000070399	alg2											ENSG00000119523	ALG2
ENSDARG00000094433	caspbl		-1.67255					-1.67286	-2.06144	-1.97328		ENSG00000137752	CASP1
ENSDARG00000069589	tmem222a											ENSG00000186501	TMEM222
ENSDARG00000069473	frem1a											ENSG00000164946	FREM1
ENSDARG00000077400	rbm10											ENSG00000182872	RBM10
ENSDARG00000098674	ppfia1											ENSG00000131626	PPFIA1
ENSDARG00000045843	apex1											ENSG00000100823	APEX1
ENSDARG00000044803	dhrs3b											ENSG00000162496	DHRS3
ENSDARG00000079839	arrdc1b											ENSG00000197070	ARRDC1
ENSDARG00000078512	acaca											ENSG00000278540	ACACA
ENSDARG00000052377	psmd12											ENSG00000197170	PSMD12
ENSDARG00000015905	lztr1											ENSG00000099949	LZTR1
ENSDARG00000052895	htra3a		3.57523	4.34194					3.2668			ENSG00000170801	HTRA3
ENSDARG00000005942	v2rl1		-1.56563
ENSDARG00000034086	zgc:65895
ENSDARG00000061723	tmem64		2.21244		1.59073				2.29916	2.97281		ENSG00000180694	TMEM64
ENSDARG00000055955	lcp2a		1.55661							1.51803		ENSG00000043462	LCP2
ENSDARG00000100352	aglb											ENSG00000162688	AGL
ENSDARG00000104953	stt3a											ENSG00000134910	STT3A
ENSDARG00000105592	CR936442.1		1.92534							2.43093
ENSDARG00000036152	gas2b											ENSG00000148935	GAS2
ENSDARG00000104177	cpne3											ENSG00000085719	CPNE3
ENSDARG00000086665	si:dkey-175g6.2
ENSDARG00000075557	apcdd1l											ENSG00000198768	APCDD1L
ENSDARG00000037455	ugt8											ENSG00000174607	UGT8
ENSDARG00000103483	litaf											ENSG00000189067	LITAF
ENSDARG00000069117	kcnh5b		-1.66663							-1.49236
ENSDARG00000104114	setd8b											ENSG00000183955	KMT5A
ENSDARG00000018025	tbx2a											ENSG00000121068	TBX2
ENSDARG00000037946	prl											ENSG00000172179	PRL
ENSDARG00000004308	fam8a1b											ENSG00000137414	FAM8A1
ENSDARG00000101613	si:dkey-238i5.2
ENSDARG00000009823	pou3f1											ENSG00000185668	POU3F1
ENSDARG00000036227	npvf		-1.85573	-1.56924						-1.8792
ENSDARG00000057678	sfrp1b									-1.56122		ENSG00000104332	SFRP1
ENSDARG00000077590	arsj											ENSG00000180801	ARSJ
ENSDARG00000077762	si:rp71-79p20.2		1.66445						1.55604	1.81255	1.52325	ENSG00000125520	SLC2A4RG
ENSDARG00000061486	DNAH10
ENSDARG00000070069	pitx3
ENSDARG00000011583	cry1ab											ENSG00000008405	CRY1
ENSDARG00000044375	zgc:158291
ENSDARG00000054420	rpe65c											ENSG00000116745	RPE65
ENSDARG00000004724	tcea3											ENSG00000204219	TCEA3
ENSDARG00000014017	rrm1											ENSG00000167325	RRM1
ENSDARG00000034700	vegfab											ENSG00000112715	VEGFA
ENSDARG00000103810	cacna2d4a		-2.04901	-1.90124					-1.98316	-2.093
ENSDARG00000076765	ddhd2									1.71279		ENSG00000085788	DDHD2
ENSDARG00000076386	epdl1
ENSDARG00000013928	plekhb2											ENSG00000115762	PLEKHB2
ENSDARG00000014803	cryba1l2
ENSDARG00000099546	kynu											ENSG00000115919	KYNU
ENSDARG00000104193	CABZ01019905.2		-5.33258				-2.90957		-3.75242	-7.61128		ENSG00000111339	ART1
ENSDARG00000090600	si:ch211-213a13.1
ENSDARG00000091471	ENSDARG00000091471											ENSG00000203734	ECT2L
ENSDARG00000056165	si:ch211-215a10.4											ENSG00000204564	C6orf136
ENSDARG00000008434	bcl2l1											ENSG00000171552	BCL2L1
ENSDARG00000039832	gsta.2			1.55856								ENSG00000170899	GSTA1
ENSDARG00000053358	basp1
ENSDARG00000076092	slc31a2											ENSG00000136867	SLC31A2
ENSDARG00000098129	si:dkeyp-97a10.2
ENSDARG00000100555	aqp11											ENSG00000178301	AQP11
ENSDARG00000054058	h1fx											ENSG00000184897	H1FX
ENSDARG00000027887	zfyve21											ENSG00000100711	ZFYVE21
ENSDARG00000055632	smtnl											ENSG00000188176	SMTNL2
ENSDARG00000038754	plk3											ENSG00000173846	PLK3
ENSDARG00000102651	ENSDARG00000102651									1.9513
ENSDARG00000056750	si:ch211-254p10.2
ENSDARG00000101927	FQ377605.1		-1.63187								-1.5228
ENSDARG00000007655	crybb1l3
ENSDARG00000098124	egfl6
ENSDARG00000103826	gpib											ENSG00000105220	GPI
ENSDARG00000103398	fabp1b.2		2.99807	2.98596					2.17723	3.18642		ENSG00000163586	FABP1
ENSDARG00000005841	tnni2a.2		-1.51108	-2.60111					-1.60327	-2.83221		ENSG00000130598	TNNI2
ENSDARG00000101982	spryd3											ENSG00000167778	SPRYD3
ENSDARG00000007682	ppdpfa											ENSG00000125534	PPDPF
ENSDARG00000012137	cyp46a1.1											ENSG00000036530	CYP46A1
ENSDARG00000092517	gpsm1a											ENSG00000160360	GPSM1
ENSDARG00000013687	cilp2											ENSG00000160161	CILP2
ENSDARG00000038557	anks3											ENSG00000168096	ANKS3
ENSDARG00000098766	pcxa											ENSG00000173599	PC
ENSDARG00000106068	CABZ01044023.1		1.84679	1.91265					2.58127	1.96167
ENSDARG00000017740	sec63											ENSG00000025796	SEC63
ENSDARG00000011602	si:dkeyp-117h8.2											ENSG00000109265	KIAA1211
ENSDARG00000015156	fbln2											ENSG00000163520	FBLN2
ENSDARG00000069261	metap2a											ENSG00000111142	METAP2
ENSDARG00000102295	dnaja3b											ENSG00000103423	DNAJA3
ENSDARG00000071173	slc12a10.2
ENSDARG00000010255	bin2b											ENSG00000110934	BIN2
ENSDARG00000027915	zc2hc1a											ENSG00000104427	ZC2HC1A
ENSDARG00000103311	ENSDARG00000103311											ENSG00000077942	FBLN1
ENSDARG00000057772	2021-03-07											ENSG00000136536	2021-03-07
ENSDARG00000026247	si:dkey-105e17.1											ENSG00000205363	C15orf59
ENSDARG00000062020	gse1											ENSG00000131149	GSE1
ENSDARG00000030289	jag1a											ENSG00000101384	JAG1
ENSDARG00000037144	cpb2									-1.53233		ENSG00000080618	CPB2
ENSDARG00000053939	tgfa			-1.49563								ENSG00000163235	TGFA
ENSDARG00000056729	her4.2
ENSDARG00000075487	si:ch211-267e7.3
ENSDARG00000077009	wdfy4											ENSG00000128815	WDFY4
ENSDARG00000097205	ulk2											ENSG00000083290	ULK2
ENSDARG00000100828	CU929150.2			1.51843					2.3106
ENSDARG00000015829	mov10a											ENSG00000155363	MOV10
ENSDARG00000045190	ch25h		2.48991	2.75175					2.01573
ENSDARG00000003098	kdm5bb											ENSG00000117139	KDM5B
ENSDARG00000076972	plvap		-1.75752
ENSDARG00000103464	pggt1b											ENSG00000164219	PGGT1B
ENSDARG00000069297	upf3a											ENSG00000169062	UPF3A
ENSDARG00000057644	adam8b								2.29325			ENSG00000151651	ADAM8
ENSDARG00000031647	stat2											ENSG00000170581	STAT2
ENSDARG00000074060	map3k14a											ENSG00000006062	MAP3K14
ENSDARG00000059690	slc29a4											ENSG00000164638	SLC29A4
ENSDARG00000036194	pitx2											ENSG00000164093	PITX2
ENSDARG00000108475	otos			-2.92967					-1.80374	-1.63393		ENSG00000178602	OTOS
ENSDARG00000102364	si:dkey-202l22.6
ENSDARG00000040503	sb:cb81
ENSDARG00000021177	cept1b											ENSG00000134255	CEPT1
ENSDARG00000044318	itgb7											ENSG00000139626	ITGB7
ENSDARG00000060846	cabp7b		-1.6426						-1.62725			ENSG00000100314	CABP7
ENSDARG00000020820	srp68											ENSG00000167881	SRP68
ENSDARG00000099900	peo1											ENSG00000107815	TWNK
ENSDARG00000055852	mtnr1ab
ENSDARG00000019128	tpm4b											ENSG00000167460	TPM4
ENSDARG00000039701	emx2											ENSG00000170370	EMX2
ENSDARG00000100406	ENSDARG00000100406											ENSG00000055955	ITIH4
ENSDARG00000074223	MDFIC											ENSG00000135272	MDFIC
ENSDARG00000078078	lrfn4b											ENSG00000173621	LRFN4
ENSDARG00000044615	zak											ENSG00000091436	MAP3K20
ENSDARG00000087092	CABZ01057488.1
ENSDARG00000015998	wdhd1											ENSG00000198554	WDHD1
ENSDARG00000058367	abhd14a											ENSG00000248487	ABHD14A
ENSDARG00000094792	twf2a											ENSG00000247596	TWF2
ENSDARG00000025348	igfbp5b											ENSG00000115461	IGFBP5
ENSDARG00000045979	zgc:153704		-2.3094						-1.67232			ENSG00000107317	PTGDS
ENSDARG00000054723	ENSDARG00000054723											ENSG00000178104	LOC653513
ENSDARG00000097962	BX571762.2
ENSDARG00000019420	etnk1											ENSG00000139163	ETNK1
ENSDARG00000061647	nrxn1a
ENSDARG00000059871	shrprbck1r											ENSG00000179526	SHARPIN
ENSDARG00000037409	tmem144a											ENSG00000164124	TMEM144
ENSDARG00000069595	si:ch211-214c7.4
ENSDARG00000097560	BX511311.5		-1.81858	-2.15195					-2.50982	-2.33089
ENSDARG00000077775	BAALC											ENSG00000164929	BAALC
ENSDARG00000092044	si:dkey-22f5.9		-4.65297	-6.9335					-2.49954
ENSDARG00000032263	zgc:110224											ENSG00000254469
ENSDARG00000062370	bcl2l13											ENSG00000099968	BCL2L13
ENSDARG00000001803	kcnh6a											ENSG00000173826	KCNH6
ENSDARG00000041736	hsdl1											ENSG00000103160	HSDL1
ENSDARG00000003022	limk1b											ENSG00000106683	LIMK1
ENSDARG00000074860	slc5a7a											ENSG00000115665	SLC5A7
ENSDARG00000091368	AL954327.1		1.51661	1.77911
ENSDARG00000103359	SLITRK5 (1 of many)								-1.57462			ENSG00000165300	SLITRK5
ENSDARG00000008637	mtp											ENSG00000138823	MTTP
ENSDARG00000003487	nup93											ENSG00000102900	NUP93
ENSDARG00000040008	neurod6a								-2.11873	-1.62708		ENSG00000164600	NEUROD6
ENSDARG00000024488	top2a											ENSG00000131747	TOP2A
ENSDARG00000023703	kctd6b											ENSG00000168301	KCTD6
ENSDARG00000078222	aatka									1.49929		ENSG00000181409	AATK
ENSDARG00000030155	ssbp3b											ENSG00000157216	SSBP3
ENSDARG00000103542	vegfaa											ENSG00000112715	VEGFA
[truncated: 8,923 more rows]

## Sheet: Table S1.3- miR exp
Gene	BDE47	IPP	TBBPA	TBBPA_DBPE	TBPH	TCEP	TCPP	TDBPP	TiBP	TPP
dre-miR-143	0.785926	0.797965		1.01214		0.834796			0.932138	0.873677
dre-miR-92a-3p	-0.663335	-0.630417		-0.805107		-0.927899		-0.929952		-0.943091
dre-miR-430c-3p	0.623381	1.03544		0.529144		0.594063		1.21712	0.861857	0.524724
dre-miR-196c	-0.497497			-0.741183		-0.620647		-0.757541	-0.505552	-0.51217
dre-miR-196a-5p	-0.475429			-0.686477		-0.602648		-0.631003	-0.442276	-0.460254
dre-miR-196d	-0.490601			-0.733621		-0.612322		-0.734693	-0.485445	-0.501939
dre-miR-196b	-0.446174			-0.605403		-0.549837		-0.54646	-0.388804	-0.38881
dre-miR-216a	1.02068	1.2993	-0.948729	1.45708		1.363		0.908598	0.918176	0.960676
dre-miR-146b	1.18269	2.21928	1.8663	1.66061				2.20255	1.73323	1.37138
dre-miR-460-3p	0.648567	0.843853	-0.726198	0.906694		0.789635		0.488567	0.657051	0.529072
dre-miR-16c-5p	-0.318467		0.370603	-0.392787		-0.433251			-0.258338	-0.362281
dre-miR-737-5p	1.20006	1.61442		1.81432		1.46046		0.918758	1.48834	1.48976
dre-miR-125c-5p	-0.600331	-0.775081		-0.619107		-0.564459		-1.19641	-0.539313	-0.809211
dre-miR-10d-3p	-0.476741	-0.387989		-0.608281		-0.588489		-0.967958	-0.471139	-0.497717
dre-miR-125b-5p	-0.597321	-0.777048		-0.619198		-0.559977		-1.18237	-0.538384	-0.806367
dre-miR-146a	1.17752	4.18771	3.34195	1.99306		1.37516		5.08033	2.17394	1.97036
dre-miR-125a	-0.7852	-1.17184		-0.727316		-0.668625		-1.67008	-0.786164	-0.956964
dre-miR-15b-5p	0.588361	0.735399		0.656562		0.607623			0.616406	0.59321
dre-miR-21		1.76498	1.72123					2.38699	0.645526	0.520626
dre-miR-181a-5-3p		-1.05789	-0.732898	-0.456703				-1.09164	-0.980406
dre-miR-182-5p		-1.54963		-0.534666				-1.07416	-0.993641
dre-miR-181a-2-3p		-0.797369	-0.628582					-0.948553	-0.801044
dre-miR-181a-3p		-0.7972	-0.631795					-0.943927	-0.800232
dre-miR-301a		1.87106		1.28243		1.32999		0.733407	1.33608	0.774771
dre-miR-125b-2-3p		-1.34333							-0.748148
dre-miR-301c-3p		2.00644		1.32434		1.41374		0.786522	1.43913
dre-miR-101a		2.49082		1.28338		1.23202			1.67412
dre-miR-101b		2.48447		1.30969		1.2345			1.65782
dre-miR-31		1.55154	1.26884					1.43319
dre-miR-152		1.46261		1.11923		0.911154		0.82622	1.3002	0.902714
dre-miR-301b-3p		1.94904		1.27328		1.33084		0.784493	1.40455
dre-miR-137-5p		-1.21247		-0.844693		-0.633843		-1.52386	-0.900169	-0.598648
dre-miR-126a-5p		1.40794		1.21839		1.06757		1.08114	1.28087
dre-miR-126b-5p		1.40794		1.21839		1.06757		1.08114	1.28087
dre-miR-148		1.39509		1.1245		0.903014		0.793324	1.2765	0.846282
dre-miR-203a-3p		0.859219	0.827399	0.4557				1.97014	0.72038	0.501411
dre-miR-203b-3p		0.869155	0.846955	0.465197				1.98701	0.743171	0.529809
dre-miR-153a-3p		2.35651		1.94857		1.64792			2.02889	1.39668
dre-miR-489		-0.699183		-0.565893				-0.687733	-0.652659
dre-let-7c-3p		-0.937939				-0.557962		-0.640249	-0.780695	-0.51835
dre-let-7d-3p		-0.937939				-0.557962		-0.640249	-0.780695	-0.51835
dre-let-7g		-0.710643		-0.563154				-1.29738	-0.812819
dre-let-7f		-0.695098		-0.550808				-1.25661	-0.810793
dre-miR-200a-3p		0.926215		0.668247		0.593653		0.735514	0.750465
dre-miR-142b-5p		2.94806		2.25306		1.96942			2.03914
dre-miR-92a-5p		-0.858373		-0.652337		-0.549723				-0.563044
dre-miR-142a-5p		2.90572		2.21579		1.93201			1.99802
dre-miR-92a-2-5p		-0.896863
dre-miR-181c-3p		-0.740657						-1.22822	-0.572678
dre-miR-153c-3p		1.8959		1.49952					1.57886
dre-let-7a		-0.674466		-0.595179				-1.24531	-0.810206
dre-miR-138-5p		1.45642	-1.11421			0.903392			0.89666
dre-miR-19b-3p		1.12375		0.659507					0.81701
dre-miR-29a		1.31681						1.05609
dre-miR-30e-5p		0.779288		0.943301		0.765914		0.818179	0.750626	0.621644
dre-miR-19d-3p		1.05511							0.778306
dre-miR-212-5p		-0.632201		-0.65465					-1.1174	-0.400556
dre-miR-722		1.42176		0.996996					1.14252
dre-miR-30c-3p		-0.943048	0.582948
dre-let-7c-5p		-0.68732		-0.64792				-1.35027	-0.85159
dre-miR-125c-3p		-0.657535		-0.685777		-0.60302		-0.597172	-0.596641	-0.579795
dre-miR-34c-5p		-0.607944		-0.462403		-0.551083				-0.434196
dre-miR-193b-5p		-0.879616		-0.578269					-0.565492
dre-miR-736		2.37448							1.43898
dre-miR-19a-3p		1.53493							1.13219
dre-miR-183-5p		-1.03842							-0.67206
dre-miR-499-5p		1.04782							0.891595
dre-miR-141-3p		0.691021	0.473037	0.439952				0.595392	0.513365
dre-miR-216b		0.764999		0.84762		0.641133			0.511503
dre-miR-153b-3p		1.25281		1.0265					1.18547
dre-miR-18a		0.878352		0.851048		0.760158			0.742216
dre-miR-144-3p		2.83483		2.36403		2.06001
dre-miR-18b-5p		0.871571		0.843608		0.751511			0.738393
dre-miR-193b-3p		-0.730618							-0.519266
dre-miR-142a-3p		2.27947		1.62268
dre-miR-203a-5p		0.825225	0.638201	0.622829		0.585545		1.27567	0.793713	0.645931
dre-miR-214		-0.69365		-0.626047				-0.579789	-0.54611
dre-miR-19c-3p		1.14519							0.80276
dre-miR-203b-5p		0.82526	0.636895	0.615949		0.583243		1.27306	0.796821	0.650319
dre-miR-1788-3p		1.59076	-1.38881	1.29964		1.19289
dre-miR-125b-1-3p		-0.735722
dre-miR-30a-5p		1.02551		1.29685					1.14641	0.791864
dre-miR-124-3p		0.943205	-0.67716	0.816294		0.799825
dre-miR-145-5p		-0.763538						-0.695213		-0.622492
dre-miR-2184		1.61067				1.1926		1.23541	1.30869
dre-let-7d-5p		-0.652604		-0.706584				-1.24873	-0.868884	-0.487669
dre-miR-132-5p		-0.67475		-0.734214					-1.04055
dre-miR-430a-3p		0.485445	0.776781					0.675366	0.472757
dre-let-7b		-0.641295		-0.679967				-1.2009	-0.83707
dre-miR-30c-5p		-0.604658								-0.506971
dre-miR-726		-1.2795							-1.15355
dre-miR-430i-3p		0.473975	0.77708					0.654658	0.430193
dre-miR-338-5p		-0.84569	-0.661155					-0.750806
dre-miR-2187-5p		1.45874		1.27905					1.14999
dre-miR-734		-0.548718	-0.493676	-0.433524		-0.525406		-0.701703
dre-miR-183-3p		-0.786438							-0.608254
dre-miR-727-5p		-0.879027						-0.831077
dre-miR-738		1.90014	2.23616					4.43378
dre-miR-10c-5p		-0.537523
dre-miR-2191		-0.650622	-0.628155					-0.590369	-0.523487	-0.68014
dre-miR-135b-5p		0.897521						1.1018
dre-miR-430c-5p		1.12144							1.3758
dre-miR-15b-3p		-0.548688
dre-miR-219-5p		1.78028		2.06249		2.26097			2.00063
dre-miR-217		0.528979
dre-miR-30a-3p		0.881526							0.961677
dre-miR-92b-3p		-0.628304						-1.02498		-0.653877
dre-miR-727-3p		-0.512823		-0.423683				-0.867664
dre-miR-731		1.48684
dre-let-7j		-0.529793	-0.664278					-0.664536	-0.557982
dre-miR-20a-3p		0.39337		0.418215		0.517062			0.477309
dre-miR-99		-0.700406
dre-miR-100-5p		-0.698615
dre-miR-190a		1.30795
dre-miR-135a		0.778446						0.846208
dre-miR-128-5p		-0.700846						-0.988298	-0.864783
dre-miR-2189		1.22511						0.998335
dre-miR-19d-5p		-0.957834
dre-miR-25-3p		0.222824	0.259723
dre-miR-430b-5p		0.859955
dre-miR-2188-5p		1.08819
dre-miR-10b-2-3p		0.649821							0.744541
dre-miR-20a-5p		0.461839
dre-miR-34b		0.884832
dre-miR-137-3p		0.70036
dre-let-7h		-0.475047	-0.491201					-0.451835	-0.814829
dre-miR-107a-3p		0.284636						-0.557775
dre-miR-19c-5p		1.23216		1.47977
dre-miR-27e		0.396303		0.396555				0.746186
dre-miR-462		1.16719						1.09152
dre-miR-725-3p		0.906279		1.13692				1.67618	0.843915
dre-miR-499-3p		0.877265		1.07072		0.930137		0.975747
dre-miR-103		0.283371						-0.596407
dre-miR-301b-5p		-0.505519
dre-miR-128-3p		-0.393281				-0.572625		-0.813664		-0.467788
dre-miR-301c-5p		-0.502499
dre-miR-454a		0.314596	0.533656
dre-miR-10a-5p		-0.4872
dre-miR-199-3p		0.42011						-0.418014
dre-miR-25-5p		-0.495689
dre-miR-140-5p		0.564247
dre-miR-10b-5p		-0.52193
dre-miR-181b-5p		-0.2947	-0.33931					-0.862483	-0.390632
dre-miR-181c-5p		-0.294021	-0.338467					-0.86434	-0.388073
dre-miR-181a-3-3p		-0.414281				-0.482414		-1.04347		-0.56265
dre-miR-205-5p		0.354753	0.609991
dre-miR-140-3p		0.267587				0.30757		0.356111		0.3371
dre-miR-7a				0.901969		0.751607				0.706736
dre-miR-7b				0.895971		0.741852				0.708064
dre-miR-18b-3p				-0.632738		-0.483659		-0.482194
dre-miR-187				-0.572343					-0.427638
dre-miR-16b			0.412058	-0.321337		-0.36174				-0.317272
dre-miR-1388-5p				1.20214				1.87444	1.31369	1.11588
dre-miR-375				-0.446004		-0.366752		-0.494182
dre-miR-24b-5p				1.16004		0.976276		0.996342
dre-miR-15c				-0.962913				-1.04059		-0.835532
dre-miR-15a-5p				0.472971		0.705465				0.498103
dre-miR-10b-3p			0.494027	0.470176		0.502705			0.536206
dre-miR-16a			0.554511	-0.29883		-0.382528		-0.280703		-0.350959
dre-miR-96-5p			-1.19345	1.15594		1.64043
dre-miR-184				0.651883				1.06622
dre-miR-365				-0.523667				0.471416
dre-miR-200c-3p			0.690722
dre-miR-181a-4-3p			-1.71334
dre-miR-200b-3p			0.620854			-0.3927
dre-let-7i			-0.969774
dre-miR-454b			0.529618					0.279405
dre-miR-150			0.934671
dre-miR-190b			-1.48098					-1.30791	-0.936696
dre-miR-10c-3p			0.53692						0.374851
dre-miR-430b-3p			0.66986					0.636701
dre-miR-139-5p			0.556237
dre-miR-210-3p			-1.06003
dre-miR-133a-3p			-0.456084
dre-miR-199-5p			-0.727795
dre-miR-133c-5p			-0.851052
dre-miR-133b-5p			-0.871578					0.596095
dre-miR-429b			0.600387
dre-miR-182-3p			-1.46529
dre-miR-30e-3p			0.337757
dre-miR-126b-3p			0.355303						0.278695
dre-miR-126a-3p			0.354606						0.278406
dre-miR-133b-3p			-0.482409					0.374031
dre-miR-10a-3p			0.512643							-0.552436
dre-miR-219-3p			0.380566					-0.537907
dre-miR-124-6-5p			-0.491365					-0.923533	-0.474464
dre-miR-124-5p			-0.493763					-0.907134	-0.458452
dre-miR-735-3p			0.927663					3.97439
dre-miR-430a-11-5p			0.476631						0.438777
dre-miR-430a-12-5p			0.476631						0.438777
dre-miR-430a-13-5p			0.476631						0.438777
dre-miR-430a-14-5p			0.476631						0.438777
dre-miR-430a-15-5p			0.476631						0.438777
dre-miR-430a-16-5p			0.476631						0.438777
dre-miR-430a-17-5p			0.476631						0.438777
dre-miR-430a-4-5p			0.476631						0.438777
dre-miR-430i-5p			0.476631						0.438777
dre-miR-460-5p			-1.10825
dre-miR-96-3p			-0.762984					-0.963523
dre-miR-430a-5p			0.437453						0.429234
dre-miR-129-5p			-0.395555					-0.508098	-0.423008
dre-miR-133a-5p			-0.48438
dre-miR-133a-2-5p			-0.48438
dre-miR-455-3p			0.598936
dre-miR-7148-5p						-0.522587
dre-miR-34a								2.63075
dre-miR-222a-5p								0.78152
dre-miR-9-7-3p								-1.407
dre-miR-9-3p								-1.49681
dre-miR-9-4-3p								-1.33995
dre-miR-128-3-5p								-1.25404
dre-miR-9-5p								-1.28289
dre-miR-221-5p								1.30091
dre-miR-181a-5p								-0.822241
dre-miR-130c-3p								0.464513
dre-miR-222a-3p								0.568005
dre-miR-7145								1.77311
dre-miR-22a-5p								1.21872
dre-miR-206-5p								0.785283
dre-miR-130b								0.48773
dre-miR-210-5p								-1.05516
dre-miR-459-3p								-1.82897
dre-miR-732								1.00442
dre-miR-2188-3p								-0.857114
dre-miR-221-3p								0.604697
dre-miR-18c								-0.494706
dre-miR-456								0.534045
dre-miR-138-2-3p								-1.78511
dre-miR-735-5p								1.40815
dre-miR-130a								0.283652
dre-miR-27a-3p								0.538513
dre-miR-125b-3-3p								-0.571537
dre-miR-26a-3p								0.625895
dre-miR-122								-0.889953
dre-miR-27c-3p								0.522018
dre-miR-22a-3p								0.512087
dre-miR-133c-3p								0.835755
dre-miR-93								-0.38018
dre-miR-27d								0.497514
dre-miR-27b-3p								0.505893
dre-miR-181b-3p								-0.746675	-0.932631
dre-miR-196a-3p								-0.62293
dre-miR-17a-5p								-0.306269
dre-miR-200a-5p								0.424699		0.474694
dre-miR-2192								1.37715
dre-miR-199-3-3p								-0.445215
dre-miR-724								-0.272343
dre-miR-204-5p								0.513774
dre-miR-144-5p								-0.772754
dre-miR-141-5p								0.407616		0.461306
dre-miR-206-3p								0.572594
dre-miR-24b-3p								0.431754
dre-miR-192									0.677332	0.412105
dre-miR-132-3p									-0.90992
dre-miR-212									-0.794015
dre-miR-212-3p									-0.794015
dre-miR-129-1-3p									-1.25433
dre-miR-129-3-3p									-1.25433
dre-miR-129-3p									-1.12975
dre-miR-92b-5p									-1.07621
dre-miR-181b-3-3p									-0.71351
dre-miR-1										0.55478
