# Supplementary material for: Phenotypically Anchored mRNA and miRNA Expression Profiling in Zebrafish Reveals Flame Retardant Chemical Toxicity Networks
Source: Front Cell Dev Biol. 2021 Apr 9;9:663032. doi: 10.3389/fcell.2021.663032 (PMC8063052; doi:10.3389/fcell.2021.663032)
Supplement: Supplementary file 2 [file Table_2.XLSX]

## Sheet: Table S2.1- all FR-experimental
regulator	target	category	evidence	source	regulator.association.disease	target.association.disease	is_regulator_in_disease	is_target_in_disease	target.reg	regulator.reg	Chemical	anticorr?
RARG	RARG	tf-gene	Experimental	Transfac	Cleft Palate, Musculoskeletal Abnormalities	Cleft Palate, Musculoskeletal Abnormalities	FALSE	FALSE	1	1	BDE-47
RXRA	RARG	tf-gene	Experimental	Transfac	Prostatic Neoplasms, Amyotrophic lateral sclerosis 1, Sciatic Neuropathy	Cleft Palate, Musculoskeletal Abnormalities	FALSE	FALSE	1	1	BDE-47
RXRA	SEMA6B	tf-gene	Experimental	PMID20584335	Prostatic Neoplasms, Amyotrophic lateral sclerosis 1, Sciatic Neuropathy		FALSE	FALSE	1	1	BDE-47
hsa-mir-125b-5p	KLF13	mirna-gene	Experimental	mirtarbase		Endometriosis	FALSE	FALSE	1	-1	BDE-47	anticorr
hsa-mir-125b-5p	VDR	mirna-gene	Experimental	mirtarbase		Vitamin D-Dependent Rickets, Type 2A, Osteoporosis, Rickets, Prostatic Neoplasms, Hypertension, Vitamin D Deficiency, Neoplasms, Alopecia, Uremia, Carcinoma, Transitional Cell, Epilepsy, Temporal Lobe, Genetic Diseases, Inborn, Leukemia, Lymphocytic, Chronic, B-Cell	FALSE	FALSE	1	-1	BDE-47	anticorr
hsa-mir-125b-5p	TNFAIP3	mirna-gene	Experimental	mirtarbase		Lupus Erythematosus, Systemic, Arthritis, Rheumatoid, Psoriasis	FALSE	FALSE	1	-1	BDE-47	anticorr
hsa-mir-143	DNMT3A	mirna-gene	Experimental	mirtarbase.adstudy	Breast Neoplasms, Colonic Neoplasms, Colonic Neoplasms, Colonic Neoplasms, Colonic Neoplasms, Colonic Neoplasms, Colorectal Neoplasms, Hepatitis, Chronic, Hepatitis, Chronic, Lung Neoplasms, Muscular Disorders, Atrophic, Obesity, ACTH-Secreting Pituitary Adenoma, Barrett Esophagus, Urinary Bladder Neoplasms, Uterine Cervical Neoplasms, Colorectal Neoplasms, Colorectal Neoplasms, Endometriosis, Ob…	Crohn Disease, Lung Neoplasms, Leukemia, Monocytic, Acute	FALSE	FALSE	1	1	BDE-47
hsa-mir-146a	NFIX	mirna-gene	Experimental	mirrecords.adstudy	Breast Neoplasms, Leukemia, Lymphocytic, Chronic, B-Cell, Lung Neoplasms, Muscular Disorders, Atrophic, Pancreatic Neoplasms, Prostatic Neoplasms, Psoriasis, Psoriasis, Thyroid Neoplasms, Thyroid Neoplasms, Thyroid Neoplasms, Thyroid Neoplasms, Thyroid Neoplasms, Lymphoma, B-Cell, Burkitt Lymphoma, Eczema, Alzheimer Disease, Autistic Disorder, Breast Neoplasms, Breast Neoplasms, Breast Neoplasms,…		FALSE	FALSE	1	1	BDE-47
hsa-mir-92a-3p	ARID4B	mirna-gene	Experimental	mirtarbase		Carcinoma, Adenoid Cystic	FALSE	FALSE	1	-1	BDE-47	anticorr
hsa-mir-92a-3p	BMPR2	mirna-gene	Experimental	mirtarbase		Pulmonary arterial hypertension, Hypertension, Pulmonary, Pulmonary Veno-Occlusive Disease, Hyperandrogenism	FALSE	FALSE	1	-1	BDE-47	anticorr
hsa-mir-92a-3p	OSBPL2	mirna-gene	Experimental	mirtarbase			FALSE	FALSE	1	-1	BDE-47	anticorr
hsa-mir-92a-3p	HIPK3	mirna-gene	Experimental	mirtarbase			FALSE	FALSE	1	-1	BDE-47	anticorr
RARG	RARG	tf-gene	Experimental	Transfac	Cleft Palate, Musculoskeletal Abnormalities	Cleft Palate, Musculoskeletal Abnormalities	FALSE	FALSE	1	1	TPP
RXRA	CYP3A4	tf-gene	Experimental	PMID20584335	Prostatic Neoplasms, Amyotrophic lateral sclerosis 1, Sciatic Neuropathy	Breast Neoplasms, Prostatic Neoplasms, Osteosarcoma, Hepatitis C, Torsades de Pointes	FALSE	FALSE	1	1	TPP
RXRA	RARG	tf-gene	Experimental	Transfac	Prostatic Neoplasms, Amyotrophic lateral sclerosis 1, Sciatic Neuropathy	Cleft Palate, Musculoskeletal Abnormalities	FALSE	FALSE	1	1	TPP
RXRA	SEMA6B	tf-gene	Experimental	PMID20584335	Prostatic Neoplasms, Amyotrophic lateral sclerosis 1, Sciatic Neuropathy		FALSE	FALSE	1	1	TPP
VDR	CYP3A4	tf-gene	Experimental	Transfac	Vitamin D-Dependent Rickets, Type 2A, Osteoporosis, Rickets, Prostatic Neoplasms, Hypertension, Vitamin D Deficiency, Neoplasms, Alopecia, Uremia, Carcinoma, Transitional Cell, Epilepsy, Temporal Lobe, Genetic Diseases, Inborn, Leukemia, Lymphocytic, Chronic, B-Cell	Breast Neoplasms, Prostatic Neoplasms, Osteosarcoma, Hepatitis C, Torsades de Pointes	FALSE	FALSE	1	1	TPP
hsa-mir-125b-5p	TNFAIP3	mirna-gene	Experimental	mirtarbase		Lupus Erythematosus, Systemic, Arthritis, Rheumatoid, Psoriasis	FALSE	FALSE	1	-1	TPP	anticorr
hsa-mir-125b-5p	VDR	mirna-gene	Experimental	mirtarbase		Vitamin D-Dependent Rickets, Type 2A, Osteoporosis, Rickets, Prostatic Neoplasms, Hypertension, Vitamin D Deficiency, Neoplasms, Alopecia, Uremia, Carcinoma, Transitional Cell, Epilepsy, Temporal Lobe, Genetic Diseases, Inborn, Leukemia, Lymphocytic, Chronic, B-Cell	FALSE	FALSE	1	-1	TPP	anticorr
hsa-mir-143	DNMT3A	mirna-gene	Experimental	mirtarbase.adstudy	Breast Neoplasms, Colonic Neoplasms, Colonic Neoplasms, Colonic Neoplasms, Colonic Neoplasms, Colonic Neoplasms, Colorectal Neoplasms, Hepatitis, Chronic, Hepatitis, Chronic, Lung Neoplasms, Muscular Disorders, Atrophic, Obesity, ACTH-Secreting Pituitary Adenoma, Barrett Esophagus, Urinary Bladder Neoplasms, Uterine Cervical Neoplasms, Colorectal Neoplasms, Colorectal Neoplasms, Endometriosis, Ob…	Crohn Disease, Lung Neoplasms, Leukemia, Monocytic, Acute	FALSE	FALSE	1	1	TPP
hsa-mir-145-5p	KREMEN1	mirna-gene	Experimental	mirtarbase			FALSE	FALSE	1	-1	TPP	anticorr
hsa-mir-145-5p	MYO5A	mirna-gene	Experimental	mirtarbase		Griscelli syndrome type 1, Peripheral Nervous System Diseases	FALSE	FALSE	1	-1	TPP	anticorr
hsa-mir-192	PDE2A	mirna-gene	Experimental	mirtarbase.adstudy	Heart Failure, Lung Neoplasms, Lung Neoplasms, Colonic Neoplasms, Adrenocortical Carcinoma, Nephrosclerosis, Adenocarcinoma, Fibrosis, Reperfusion Injury, Carcinoma, Multiple Myeloma, Lupus Erythematosus, Systemic, Retinoblastoma, Carcinoma, Hepatocellular, Pancreatic Neoplasms, Muscular Dystrophies, Drug-Induced Liver Injury, Barrett Esophagus, Carcinoma, Hepatocellular, Stomach Neoplasms, Diabe…	Breast Neoplasms	FALSE	FALSE	1	1	TPP
hsa-mir-196a-5p	ANXA1	mirna-gene	Experimental	mirtarbase		Neoplasm Metastasis, Mammary Neoplasms, Experimental, Carcinoma, Squamous Cell, Prostatic Neoplasms, Carcinoma, Adenocarcinoma of lung, Esophageal Squamous Cell Carcinoma, Lymphatic Metastasis, Craniofacial Abnormalities, Kidney Diseases, Mammary Neoplasms, Animal, Mouth Neoplasms, Neoplasm Invasiveness, Stomach Diseases	FALSE	FALSE	-1	-1	TPP
hsa-mir-21	BMPR2	mirna-gene	Experimental	mirtarbase.adstudy	Brain Neoplasms, Brain Neoplasms, Breast Neoplasms, Breast Neoplasms, Breast Neoplasms, Breast Neoplasms, Breast Neoplasms, Cholangiocarcinoma, Colonic Neoplasms, Dermatitis, Atopic, Focal Epithelial Hyperplasia, Glioblastoma, Glioblastoma, Glioblastoma, Glioblastoma, Glioblastoma, Glioblastoma, Heart Diseases, Heart Failure, Lung Neoplasms, Lung Neoplasms, Lymphoma, Large B-Cell, Diffuse, Muscul…	Pulmonary arterial hypertension, Hypertension, Pulmonary, Pulmonary Veno-Occlusive Disease, Hyperandrogenism	FALSE	FALSE	1	1	TPP
hsa-mir-21	TNFAIP3	mirna-gene	Experimental	mirtarbase.adstudy	Brain Neoplasms, Brain Neoplasms, Breast Neoplasms, Breast Neoplasms, Breast Neoplasms, Breast Neoplasms, Breast Neoplasms, Cholangiocarcinoma, Colonic Neoplasms, Dermatitis, Atopic, Focal Epithelial Hyperplasia, Glioblastoma, Glioblastoma, Glioblastoma, Glioblastoma, Glioblastoma, Glioblastoma, Heart Diseases, Heart Failure, Lung Neoplasms, Lung Neoplasms, Lymphoma, Large B-Cell, Diffuse, Muscul…	Lupus Erythematosus, Systemic, Arthritis, Rheumatoid, Psoriasis	FALSE	FALSE	1	1	TPP
hsa-mir-21	HIPK3	mirna-gene	Experimental	mirrecords.adstudy	Brain Neoplasms, Brain Neoplasms, Breast Neoplasms, Breast Neoplasms, Breast Neoplasms, Breast Neoplasms, Breast Neoplasms, Cholangiocarcinoma, Colonic Neoplasms, Dermatitis, Atopic, Focal Epithelial Hyperplasia, Glioblastoma, Glioblastoma, Glioblastoma, Glioblastoma, Glioblastoma, Glioblastoma, Heart Diseases, Heart Failure, Lung Neoplasms, Lung Neoplasms, Lymphoma, Large B-Cell, Diffuse, Muscul…		FALSE	FALSE	1	1	TPP
hsa-mir-92a-3p	ARID4B	mirna-gene	Experimental	mirtarbase		Carcinoma, Adenoid Cystic	FALSE	FALSE	1	-1	TPP	anticorr
hsa-mir-92a-3p	BMPR2	mirna-gene	Experimental	mirtarbase		Pulmonary arterial hypertension, Hypertension, Pulmonary, Pulmonary Veno-Occlusive Disease, Hyperandrogenism	FALSE	FALSE	1	-1	TPP	anticorr
hsa-mir-92a-3p	HIPK3	mirna-gene	Experimental	mirtarbase			FALSE	FALSE	1	-1	TPP	anticorr
hsa-mir-92a-3p	OSBPL2	mirna-gene	Experimental	mirtarbase			FALSE	FALSE	1	-1	TPP	anticorr
ATF3	ATF3	tf-gene	Experimental	Transfac	Hypospadias, Prostatic Neoplasms, Carcinoma, Non-Small-Cell Lung, Diabetes Mellitus, Type 2, Influenza, Human, Liver Neoplasms, Diabetes Mellitus, Experimental, Infarction, Middle Cerebral Artery, Nervous System Diseases, Ovarian Neoplasms, Peripheral Nervous System Diseases	Hypospadias, Prostatic Neoplasms, Carcinoma, Non-Small-Cell Lung, Diabetes Mellitus, Type 2, Influenza, Human, Liver Neoplasms, Diabetes Mellitus, Experimental, Infarction, Middle Cerebral Artery, Nervous System Diseases, Ovarian Neoplasms, Peripheral Nervous System Diseases	FALSE	FALSE	1	1	IPP
FOS	FOSL1	tf-gene	Experimental	Transfac	Hypertension, Reperfusion Injury, Carcinoma, Hepatocellular, Breast Neoplasms, Endometriosis, Seizures, Amphetamine-Related Disorders, Amyotrophic lateral sclerosis 1, Anxiety Disorders, Brain Injuries, Cocaine-Related Disorders, Epilepsy, Fibrous Dysplasia of Bone, Hemorrhage, Hyperkinesis, Infarction, Middle Cerebral Artery, Lung Neoplasms, Nervous System Diseases, Neurotoxicity Syndromes, Stat…		FALSE	FALSE	1	1	IPP
FOS	FOS	tf-gene	Experimental	Transfac	Hypertension, Reperfusion Injury, Carcinoma, Hepatocellular, Breast Neoplasms, Endometriosis, Seizures, Amphetamine-Related Disorders, Amyotrophic lateral sclerosis 1, Anxiety Disorders, Brain Injuries, Cocaine-Related Disorders, Epilepsy, Fibrous Dysplasia of Bone, Hemorrhage, Hyperkinesis, Infarction, Middle Cerebral Artery, Lung Neoplasms, Nervous System Diseases, Neurotoxicity Syndromes, Stat…	Hypertension, Reperfusion Injury, Carcinoma, Hepatocellular, Breast Neoplasms, Endometriosis, Seizures, Amphetamine-Related Disorders, Amyotrophic lateral sclerosis 1, Anxiety Disorders, Brain Injuries, Cocaine-Related Disorders, Epilepsy, Fibrous Dysplasia of Bone, Hemorrhage, Hyperkinesis, Infarction, Middle Cerebral Artery, Lung Neoplasms, Nervous System Diseases, Neurotoxicity Syndromes, Stat…	FALSE	FALSE	1	1	IPP
FOS	PLAU	tf-gene	Experimental	Transfac	Hypertension, Reperfusion Injury, Carcinoma, Hepatocellular, Breast Neoplasms, Endometriosis, Seizures, Amphetamine-Related Disorders, Amyotrophic lateral sclerosis 1, Anxiety Disorders, Brain Injuries, Cocaine-Related Disorders, Epilepsy, Fibrous Dysplasia of Bone, Hemorrhage, Hyperkinesis, Infarction, Middle Cerebral Artery, Lung Neoplasms, Nervous System Diseases, Neurotoxicity Syndromes, Stat…	Alzheimer Disease, Myocardial Infarction, Asthenozoospermia, Brain Edema, Intracranial Hemorrhages, Reperfusion Injury, Thrombosis, Neoplasm Metastasis, Prostatic Neoplasms, Asthma, Adenocarcinoma, Pancreatic Neoplasms, Carcinoma, Transitional Cell, Idiopathic Pulmonary Fibrosis, Stomach Neoplasms, Liver Cirrhosis, Bone Neoplasms, Angina Pectoris, Angina, Unstable, Anuria, Arterial Occlusive Dise…	FALSE	FALSE	1	1	IPP
FOSL1	FOSL1	tf-gene	Experimental	Transfac			FALSE	FALSE	1	1	IPP
FOSL1	PLAU	tf-gene	Experimental	Transfac		Alzheimer Disease, Myocardial Infarction, Asthenozoospermia, Brain Edema, Intracranial Hemorrhages, Reperfusion Injury, Thrombosis, Neoplasm Metastasis, Prostatic Neoplasms, Asthma, Adenocarcinoma, Pancreatic Neoplasms, Carcinoma, Transitional Cell, Idiopathic Pulmonary Fibrosis, Stomach Neoplasms, Liver Cirrhosis, Bone Neoplasms, Angina Pectoris, Angina, Unstable, Anuria, Arterial Occlusive Dise…	FALSE	FALSE	1	1	IPP
FOSL2	FOSL1	tf-gene	Experimental	Transfac			FALSE	FALSE	1	1	IPP
IL1B	hsa-mir-146a	tf-mirna	Experimental	Transmir	Alzheimer Disease, Inflammation, Pneumonia, Pulmonary Fibrosis, Myocardial Infarction, Seizures, Stomach Neoplasms, Brain Injuries, Arthritis, Experimental, Diabetes Mellitus, Experimental, Drug-Induced Liver Injury, Fever, Hyperalgesia, Mucositis, Pleurisy, Arthritis, Rheumatoid, Multiple Sclerosis, Schizophrenia, Gastritis, Atrophic, Colitis, Ulcerative, Adenocarcinoma, Dermatomyositis, Stroke,…	Breast Neoplasms, Leukemia, Lymphocytic, Chronic, B-Cell, Lung Neoplasms, Muscular Disorders, Atrophic, Pancreatic Neoplasms, Prostatic Neoplasms, Psoriasis, Psoriasis, Thyroid Neoplasms, Thyroid Neoplasms, Thyroid Neoplasms, Thyroid Neoplasms, Thyroid Neoplasms, Lymphoma, B-Cell, Burkitt Lymphoma, Eczema, Alzheimer Disease, Autistic Disorder, Breast Neoplasms, Breast Neoplasms, Breast Neoplasms,…	FALSE	FALSE	1	1	IPP
IRF1	ISG15	tf-gene	Experimental	Transfac	Brain Injuries, STOMACH CARCINOMA, 5q- syndrome, Stomach Neoplasms, Lung Neoplasms, Myocardial Ischemia, Stroke	Influenza, Human	FALSE	FALSE	1	1	IPP
IRF1	TAP1	tf-gene	Experimental	PMID20584335	Brain Injuries, STOMACH CARCINOMA, 5q- syndrome, Stomach Neoplasms, Lung Neoplasms, Myocardial Ischemia, Stroke	Bare Lymphocyte Syndrome, Type I, Myocardial Ischemia	FALSE	FALSE	1	1	IPP
IRF3	ISG15	tf-gene	Experimental	Transfac		Influenza, Human	FALSE	FALSE	1	1	IPP
IRF3	IRF7	tf-gene	Experimental	Transfac		Influenza, Human, Inflammation	FALSE	FALSE	1	1	IPP
IRF7	ISG15	tf-gene	Experimental	Transfac	Influenza, Human, Inflammation	Influenza, Human	FALSE	FALSE	1	1	IPP
IRF7	IRF7	tf-gene	Experimental	Transfac	Influenza, Human, Inflammation	Influenza, Human, Inflammation	FALSE	FALSE	1	1	IPP
IRF9	ISG15	tf-gene	Experimental	Transfac		Influenza, Human	FALSE	FALSE	1	1	IPP
JUNB	PLAU	tf-gene	Experimental	Transfac	Myocardial Ischemia, Infarction, Middle Cerebral Artery, Lung Neoplasms, Status Epilepticus	Alzheimer Disease, Myocardial Infarction, Asthenozoospermia, Brain Edema, Intracranial Hemorrhages, Reperfusion Injury, Thrombosis, Neoplasm Metastasis, Prostatic Neoplasms, Asthma, Adenocarcinoma, Pancreatic Neoplasms, Carcinoma, Transitional Cell, Idiopathic Pulmonary Fibrosis, Stomach Neoplasms, Liver Cirrhosis, Bone Neoplasms, Angina Pectoris, Angina, Unstable, Anuria, Arterial Occlusive Dise…	FALSE	FALSE	1	1	IPP
JUNB	FOSL1	tf-gene	Experimental	Transfac	Myocardial Ischemia, Infarction, Middle Cerebral Artery, Lung Neoplasms, Status Epilepticus		FALSE	FALSE	1	1	IPP
JUNB	TGM1	tf-gene	Experimental	Transfac	Myocardial Ischemia, Infarction, Middle Cerebral Artery, Lung Neoplasms, Status Epilepticus	Lamellar ichthyosis, type 1, Ichthyosiform erythroderma, Brocq congenital, nonbullous form, Chloracne, Dry Eye Syndromes, Liver Diseases, Neurotoxicity Syndromes, Vitamin A Deficiency	FALSE	FALSE	-1	1	IPP	anticorr
PBX1	PLAU	tf-gene	Experimental	Transfac	Burkitt Lymphoma, Substance-Related Disorders	Alzheimer Disease, Myocardial Infarction, Asthenozoospermia, Brain Edema, Intracranial Hemorrhages, Reperfusion Injury, Thrombosis, Neoplasm Metastasis, Prostatic Neoplasms, Asthma, Adenocarcinoma, Pancreatic Neoplasms, Carcinoma, Transitional Cell, Idiopathic Pulmonary Fibrosis, Stomach Neoplasms, Liver Cirrhosis, Bone Neoplasms, Angina Pectoris, Angina, Unstable, Anuria, Arterial Occlusive Dise…	FALSE	FALSE	1	1	IPP
PLAU	FOS	tf-gene	Experimental	PMID20584335	Alzheimer Disease, Myocardial Infarction, Asthenozoospermia, Brain Edema, Intracranial Hemorrhages, Reperfusion Injury, Thrombosis, Neoplasm Metastasis, Prostatic Neoplasms, Asthma, Adenocarcinoma, Pancreatic Neoplasms, Carcinoma, Transitional Cell, Idiopathic Pulmonary Fibrosis, Stomach Neoplasms, Liver Cirrhosis, Bone Neoplasms, Angina Pectoris, Angina, Unstable, Anuria, Arterial Occlusive Dise…	Hypertension, Reperfusion Injury, Carcinoma, Hepatocellular, Breast Neoplasms, Endometriosis, Seizures, Amphetamine-Related Disorders, Amyotrophic lateral sclerosis 1, Anxiety Disorders, Brain Injuries, Cocaine-Related Disorders, Epilepsy, Fibrous Dysplasia of Bone, Hemorrhage, Hyperkinesis, Infarction, Middle Cerebral Artery, Lung Neoplasms, Nervous System Diseases, Neurotoxicity Syndromes, Stat…	FALSE	FALSE	1	1	IPP
RARG	RARG	tf-gene	Experimental	Transfac	Cleft Palate, Musculoskeletal Abnormalities	Cleft Palate, Musculoskeletal Abnormalities	FALSE	FALSE	1	1	IPP
RXRA	IGFBP1	tf-gene	Experimental	PMID20584335	Prostatic Neoplasms, Amyotrophic lateral sclerosis 1, Sciatic Neuropathy	Endometriosis, Abortion, Spontaneous, Colonic Neoplasms, Drug Toxicity, Liver Cirrhosis, Biliary, Liver Cirrhosis, Experimental, Precancerous Conditions	FALSE	FALSE	1	1	IPP
RXRA	CYP3A4	tf-gene	Experimental	PMID20584335	Prostatic Neoplasms, Amyotrophic lateral sclerosis 1, Sciatic Neuropathy	Breast Neoplasms, Prostatic Neoplasms, Osteosarcoma, Hepatitis C, Torsades de Pointes	FALSE	FALSE	1	1	IPP
RXRA	INSIG1	tf-gene	Experimental	PMID20584335	Prostatic Neoplasms, Amyotrophic lateral sclerosis 1, Sciatic Neuropathy	Carcinoma, Mammary Neoplasms, Animal, Mammary Neoplasms, Experimental	FALSE	FALSE	1	1	IPP
RXRA	RARG	tf-gene	Experimental	Transfac	Prostatic Neoplasms, Amyotrophic lateral sclerosis 1, Sciatic Neuropathy	Cleft Palate, Musculoskeletal Abnormalities	FALSE	FALSE	1	1	IPP
RXRA	SEMA6B	tf-gene	Experimental	PMID20584335	Prostatic Neoplasms, Amyotrophic lateral sclerosis 1, Sciatic Neuropathy		FALSE	FALSE	1	1	IPP
SREBF1	LDLR	tf-gene	Experimental	Transfac	Diabetes Mellitus, Experimental, Obesity, Kidney Failure, Chronic, Carcinoma, Hepatocellular	HYPERCHOLESTEROLEMIA, FAMILIAL, Hypercholesterolemia, Hyperlipoproteinemia Type II, Atherosclerosis, Coronary Disease, Coronary Artery Disease, Hyperlipidemias, Dyslipidemias, Non-alcoholic Fatty Liver Disease, Amyotrophic lateral sclerosis 1, Hyperplasia	FALSE	FALSE	1	1	IPP
STAT5A	IRF1	tf-gene	Experimental	Transfac	Mammary Neoplasms, Experimental, Breast Neoplasms, Adenocarcinoma, Carcinoma, Carcinoma, Ductal, Carcinoma, Intraductal, Noninfiltrating, Carcinoma, Lobular, Lung Neoplasms, Mammary Neoplasms, Animal, Myocardial Ischemia, Precancerous Conditions	Brain Injuries, STOMACH CARCINOMA, 5q- syndrome, Stomach Neoplasms, Lung Neoplasms, Myocardial Ischemia, Stroke	FALSE	FALSE	1	1	IPP
TFE3	SERPINE1	tf-gene	Experimental	Transfac	Carcinoma, Renal Cell	Diabetic Nephropathies, Pre-Eclampsia, Thrombosis, Atherosclerosis, Kidney Failure, Chronic, Stomach Neoplasms, Fatty Liver, Prostatic Neoplasms, Liver Neoplasms, Autistic Disorder, Behcet Syndrome, Glomerulosclerosis, Focal Segmental, Nephrotic Syndrome, Cholestasis, Diabetes Mellitus, Experimental, Nervous System Diseases, Plasminogen Activator Inhibitor-1 Deficiency	FALSE	FALSE	1	1	IPP
TGFB1	hsa-mir-143	tf-mirna	Experimental	Transmir	Camurati-Engelmann Syndrome, Asthma, Pulmonary Disease, Chronic Obstructive, Hypertension, Pulmonary Fibrosis, Lung Diseases, Diabetes Mellitus, Experimental, Diabetic Neuropathies, Hernia, Diaphragmatic, Liver Cirrhosis, Experimental, Fibrosis, Osteoporosis, Carcinoma, Kidney Diseases, Carcinoma, Hepatocellular, Prostatic Neoplasms, Diabetic Nephropathies, Carcinoma, Squamous Cell, Inflammation,…	Breast Neoplasms, Colonic Neoplasms, Colonic Neoplasms, Colonic Neoplasms, Colonic Neoplasms, Colonic Neoplasms, Colorectal Neoplasms, Hepatitis, Chronic, Hepatitis, Chronic, Lung Neoplasms, Muscular Disorders, Atrophic, Obesity, ACTH-Secreting Pituitary Adenoma, Barrett Esophagus, Urinary Bladder Neoplasms, Uterine Cervical Neoplasms, Colorectal Neoplasms, Colorectal Neoplasms, Endometriosis, Ob…	FALSE	FALSE	1	1	IPP
TGFB1	hsa-mir-146a	tf-mirna	Experimental	Transmir	Camurati-Engelmann Syndrome, Asthma, Pulmonary Disease, Chronic Obstructive, Hypertension, Pulmonary Fibrosis, Lung Diseases, Diabetes Mellitus, Experimental, Diabetic Neuropathies, Hernia, Diaphragmatic, Liver Cirrhosis, Experimental, Fibrosis, Osteoporosis, Carcinoma, Kidney Diseases, Carcinoma, Hepatocellular, Prostatic Neoplasms, Diabetic Nephropathies, Carcinoma, Squamous Cell, Inflammation,…	Breast Neoplasms, Leukemia, Lymphocytic, Chronic, B-Cell, Lung Neoplasms, Muscular Disorders, Atrophic, Pancreatic Neoplasms, Prostatic Neoplasms, Psoriasis, Psoriasis, Thyroid Neoplasms, Thyroid Neoplasms, Thyroid Neoplasms, Thyroid Neoplasms, Thyroid Neoplasms, Lymphoma, B-Cell, Burkitt Lymphoma, Eczema, Alzheimer Disease, Autistic Disorder, Breast Neoplasms, Breast Neoplasms, Breast Neoplasms,…	FALSE	FALSE	1	1	IPP
TGFB1	hsa-mir-29a	tf-mirna	Experimental	Transmir	Camurati-Engelmann Syndrome, Asthma, Pulmonary Disease, Chronic Obstructive, Hypertension, Pulmonary Fibrosis, Lung Diseases, Diabetes Mellitus, Experimental, Diabetic Neuropathies, Hernia, Diaphragmatic, Liver Cirrhosis, Experimental, Fibrosis, Osteoporosis, Carcinoma, Kidney Diseases, Carcinoma, Hepatocellular, Prostatic Neoplasms, Diabetic Nephropathies, Carcinoma, Squamous Cell, Inflammation,…	Acquired Immunodeficiency Syndrome, Heart Failure, Leukemia, Lymphocytic, Chronic, B-Cell, Lung Neoplasms, Lung Neoplasms, Neoplasms, Schizophrenia, Lymphoma, B-Cell, Alzheimer Disease, Precursor Cell Lymphoblastic Leukemia-Lymphoma, Acquired Immunodeficiency Syndrome, Breast Neoplasms, Ovarian Neoplasms, Rhabdomyosarcoma, Neoplasms, Alzheimer Disease, Endomyocardial Fibrosis, Breast Neoplasms, M…	FALSE	FALSE	1	1	IPP
VDR	IGFBP1	tf-gene	Experimental	PMID20584335	Vitamin D-Dependent Rickets, Type 2A, Osteoporosis, Rickets, Prostatic Neoplasms, Hypertension, Vitamin D Deficiency, Neoplasms, Alopecia, Uremia, Carcinoma, Transitional Cell, Epilepsy, Temporal Lobe, Genetic Diseases, Inborn, Leukemia, Lymphocytic, Chronic, B-Cell	Endometriosis, Abortion, Spontaneous, Colonic Neoplasms, Drug Toxicity, Liver Cirrhosis, Biliary, Liver Cirrhosis, Experimental, Precancerous Conditions	FALSE	FALSE	1	1	IPP
VDR	CYP3A4	tf-gene	Experimental	Transfac	Vitamin D-Dependent Rickets, Type 2A, Osteoporosis, Rickets, Prostatic Neoplasms, Hypertension, Vitamin D Deficiency, Neoplasms, Alopecia, Uremia, Carcinoma, Transitional Cell, Epilepsy, Temporal Lobe, Genetic Diseases, Inborn, Leukemia, Lymphocytic, Chronic, B-Cell	Breast Neoplasms, Prostatic Neoplasms, Osteosarcoma, Hepatitis C, Torsades de Pointes	FALSE	FALSE	1	1	IPP
ZEB1	hsa-mir-34b	tf-mirna	Experimental	Transmir	Corneal Dystrophy, Fuchs Endothelial, 6, Corneal Dystrophy, Posterior Polymorphous, 3, Breast Neoplasms, Cell Transformation, Neoplastic, Disease Progression, Myocardial Ischemia, Neoplasm Invasiveness	Breast Neoplasms, Heart Failure, Lung Neoplasms, Leukemia, Myeloid, Acute, Leukemia, Promyelocytic, Acute, Stomach Neoplasms, Stomach Neoplasms, Neoplasms, Pancreatic Neoplasms, Neoplasms, Leukemia, Lymphocytic, Chronic, B-Cell, Stomach Neoplasms, Colorectal Neoplasms, Pancreatic Neoplasms, Breast Neoplasms, Urinary Bladder Neoplasms, Carcinoma, Renal Cell, Ovarian Neoplasms, Sarcoma, Colorectal …	FALSE	FALSE	1	1	IPP
hsa-let-7b	SNAP23	mirna-gene	Experimental	mirtarbase.adstudy	Colonic Neoplasms, Heart Failure, Lung Neoplasms, Lung Neoplasms, Lung Neoplasms, Lung Neoplasms, Lung Neoplasms, Lung Neoplasms, Lung Neoplasms, Neoplasms, Neoplasms, Neoplasms, Ovarian Neoplasms, Neoplasms, Digestive System Neoplasms, Head and Neck Neoplasms, Neoplasms, Sarcoma, Kaposi, Lung Neoplasms, Melanoma, Pancreatic Neoplasms, Pituitary Neoplasms, Lymphoma, Primary Effusion, Adrenocortic…	Myocardial Ischemia	FALSE	FALSE	1	-1	IPP	anticorr
hsa-let-7b	MAP7D1	mirna-gene	Experimental	mirtarbase.adstudy	Colonic Neoplasms, Heart Failure, Lung Neoplasms, Lung Neoplasms, Lung Neoplasms, Lung Neoplasms, Lung Neoplasms, Lung Neoplasms, Lung Neoplasms, Neoplasms, Neoplasms, Neoplasms, Ovarian Neoplasms, Neoplasms, Digestive System Neoplasms, Head and Neck Neoplasms, Neoplasms, Sarcoma, Kaposi, Lung Neoplasms, Melanoma, Pancreatic Neoplasms, Pituitary Neoplasms, Lymphoma, Primary Effusion, Adrenocortic…		FALSE	FALSE	-1	-1	IPP
hsa-let-7b	PTGS2	mirna-gene	Experimental	mirtarbase.adstudy	Colonic Neoplasms, Heart Failure, Lung Neoplasms, Lung Neoplasms, Lung Neoplasms, Lung Neoplasms, Lung Neoplasms, Lung Neoplasms, Lung Neoplasms, Neoplasms, Neoplasms, Neoplasms, Ovarian Neoplasms, Neoplasms, Digestive System Neoplasms, Head and Neck Neoplasms, Neoplasms, Sarcoma, Kaposi, Lung Neoplasms, Melanoma, Pancreatic Neoplasms, Pituitary Neoplasms, Lymphoma, Primary Effusion, Adrenocortic…	Adenocarcinoma, Neoplasm Metastasis, Lung Neoplasms, Colonic Neoplasms, Carcinoma, Hepatocellular, Inflammation, Barrett Esophagus, Esophageal Neoplasms, Carcinoma, Renal Cell, Stomach Ulcer, Hypertension, Mouth Neoplasms, Fibrosis, Hyperalgesia, Seizures, Brain Injuries, Brain Ischemia, Diabetes Mellitus, Experimental, Reperfusion Injury, Status Epilepticus, Carcinoma, Carcinoma, Squamous Cell, …	FALSE	FALSE	1	-1	IPP	anticorr
hsa-let-7b	DOCK5	mirna-gene	Experimental	mirtarbase.adstudy	Colonic Neoplasms, Heart Failure, Lung Neoplasms, Lung Neoplasms, Lung Neoplasms, Lung Neoplasms, Lung Neoplasms, Lung Neoplasms, Lung Neoplasms, Neoplasms, Neoplasms, Neoplasms, Ovarian Neoplasms, Neoplasms, Digestive System Neoplasms, Head and Neck Neoplasms, Neoplasms, Sarcoma, Kaposi, Lung Neoplasms, Melanoma, Pancreatic Neoplasms, Pituitary Neoplasms, Lymphoma, Primary Effusion, Adrenocortic…		FALSE	FALSE	1	-1	IPP	anticorr
hsa-let-7b	SLC1A4	mirna-gene	Experimental	mirtarbase.adstudy	Colonic Neoplasms, Heart Failure, Lung Neoplasms, Lung Neoplasms, Lung Neoplasms, Lung Neoplasms, Lung Neoplasms, Lung Neoplasms, Lung Neoplasms, Neoplasms, Neoplasms, Neoplasms, Ovarian Neoplasms, Neoplasms, Digestive System Neoplasms, Head and Neck Neoplasms, Neoplasms, Sarcoma, Kaposi, Lung Neoplasms, Melanoma, Pancreatic Neoplasms, Pituitary Neoplasms, Lymphoma, Primary Effusion, Adrenocortic…		FALSE	FALSE	1	-1	IPP	anticorr
hsa-let-7c-5p	TGFBR1	mirna-gene	Experimental	mirtarbase		LOEYS-DIETZ SYNDROME, TYPE 1A, Loeys-Dietz Syndrome, Type 2A, Keratoacanthoma familial, Colorectal Neoplasms, Loeys-Dietz Syndrome, Skin Neoplasms, Aneurysm, Dissecting, Abortion, Spontaneous, Auditory Neuropathy, Autosomal Dominant, 1, Uremia	FALSE	FALSE	1	-1	IPP	anticorr
hsa-let-7f	ESM1	mirna-gene	Experimental	mirrecords.adstudy			FALSE	FALSE	1	-1	IPP	anticorr
hsa-mir-100-5p	BMPR2	mirna-gene	Experimental	mirtarbase		Pulmonary arterial hypertension, Hypertension, Pulmonary, Pulmonary Veno-Occlusive Disease, Hyperandrogenism	FALSE	FALSE	1	-1	IPP	anticorr
hsa-mir-125b-5p	TNFAIP3	mirna-gene	Experimental	mirtarbase		Lupus Erythematosus, Systemic, Arthritis, Rheumatoid, Psoriasis	FALSE	FALSE	1	-1	IPP	anticorr
hsa-mir-125b-5p	VDR	mirna-gene	Experimental	mirtarbase		Vitamin D-Dependent Rickets, Type 2A, Osteoporosis, Rickets, Prostatic Neoplasms, Hypertension, Vitamin D Deficiency, Neoplasms, Alopecia, Uremia, Carcinoma, Transitional Cell, Epilepsy, Temporal Lobe, Genetic Diseases, Inborn, Leukemia, Lymphocytic, Chronic, B-Cell	FALSE	FALSE	1	-1	IPP	anticorr
hsa-mir-125b-5p	BCL3	mirna-gene	Experimental	mirtarbase			FALSE	FALSE	1	-1	IPP	anticorr
hsa-mir-128-3p	TGFBR1	mirna-gene	Experimental	mirtarbase		LOEYS-DIETZ SYNDROME, TYPE 1A, Loeys-Dietz Syndrome, Type 2A, Keratoacanthoma familial, Colorectal Neoplasms, Loeys-Dietz Syndrome, Skin Neoplasms, Aneurysm, Dissecting, Abortion, Spontaneous, Auditory Neuropathy, Autosomal Dominant, 1, Uremia	FALSE	FALSE	1	-1	IPP	anticorr
hsa-mir-138-5p	MXD1	mirna-gene	Experimental	mirtarbase		Dermatitis, Allergic Contact	FALSE	FALSE	1	1	IPP
hsa-mir-140-5p	TGFBR1	mirna-gene	Experimental	mirtarbase		LOEYS-DIETZ SYNDROME, TYPE 1A, Loeys-Dietz Syndrome, Type 2A, Keratoacanthoma familial, Colorectal Neoplasms, Loeys-Dietz Syndrome, Skin Neoplasms, Aneurysm, Dissecting, Abortion, Spontaneous, Auditory Neuropathy, Autosomal Dominant, 1, Uremia	FALSE	FALSE	1	1	IPP
hsa-mir-141-3p	ZEB1	mirna-gene	Experimental	mirtarbase		Corneal Dystrophy, Fuchs Endothelial, 6, Corneal Dystrophy, Posterior Polymorphous, 3, Breast Neoplasms, Cell Transformation, Neoplastic, Disease Progression, Myocardial Ischemia, Neoplasm Invasiveness	FALSE	FALSE	1	1	IPP
hsa-mir-141-3p	KLF11	mirna-gene	Experimental	mirtarbase		Maturity-Onset Diabetes of the Young, Type 7	FALSE	FALSE	-1	1	IPP	anticorr
hsa-mir-143	DNMT3A	mirna-gene	Experimental	mirtarbase.adstudy	Breast Neoplasms, Colonic Neoplasms, Colonic Neoplasms, Colonic Neoplasms, Colonic Neoplasms, Colonic Neoplasms, Colorectal Neoplasms, Hepatitis, Chronic, Hepatitis, Chronic, Lung Neoplasms, Muscular Disorders, Atrophic, Obesity, ACTH-Secreting Pituitary Adenoma, Barrett Esophagus, Urinary Bladder Neoplasms, Uterine Cervical Neoplasms, Colorectal Neoplasms, Colorectal Neoplasms, Endometriosis, Ob…	Crohn Disease, Lung Neoplasms, Leukemia, Monocytic, Acute	FALSE	FALSE	1	1	IPP
hsa-mir-145-5p	SERPINE1	mirna-gene	Experimental	mirtarbase		Diabetic Nephropathies, Pre-Eclampsia, Thrombosis, Atherosclerosis, Kidney Failure, Chronic, Stomach Neoplasms, Fatty Liver, Prostatic Neoplasms, Liver Neoplasms, Autistic Disorder, Behcet Syndrome, Glomerulosclerosis, Focal Segmental, Nephrotic Syndrome, Cholestasis, Diabetes Mellitus, Experimental, Nervous System Diseases, Plasminogen Activator Inhibitor-1 Deficiency	FALSE	FALSE	1	-1	IPP	anticorr
hsa-mir-145-5p	MYO5A	mirna-gene	Experimental	mirtarbase		Griscelli syndrome type 1, Peripheral Nervous System Diseases	FALSE	FALSE	1	-1	IPP	anticorr
hsa-mir-145-5p	KREMEN1	mirna-gene	Experimental	mirtarbase			FALSE	FALSE	1	-1	IPP	anticorr
hsa-mir-146a	CXCR4	mirna-gene	Experimental	mirtarbase.adstudy	Breast Neoplasms, Leukemia, Lymphocytic, Chronic, B-Cell, Lung Neoplasms, Muscular Disorders, Atrophic, Pancreatic Neoplasms, Prostatic Neoplasms, Psoriasis, Psoriasis, Thyroid Neoplasms, Thyroid Neoplasms, Thyroid Neoplasms, Thyroid Neoplasms, Thyroid Neoplasms, Lymphoma, B-Cell, Burkitt Lymphoma, Eczema, Alzheimer Disease, Autistic Disorder, Breast Neoplasms, Breast Neoplasms, Breast Neoplasms,…	WHIM syndrome, Neoplasm Metastasis, Neuralgia	FALSE	FALSE	1	1	IPP
hsa-mir-181b-5p	CBX7	mirna-gene	Experimental	mirtarbase			FALSE	FALSE	1	-1	IPP	anticorr
hsa-mir-181b-5p	MAP3K10	mirna-gene	Experimental	mirtarbase			FALSE	FALSE	1	-1	IPP	anticorr
hsa-mir-181c-5p	BMPR2	mirna-gene	Experimental	mirtarbase		Pulmonary arterial hypertension, Hypertension, Pulmonary, Pulmonary Veno-Occlusive Disease, Hyperandrogenism	FALSE	FALSE	1	-1	IPP	anticorr
hsa-mir-182-5p	RARG	mirna-gene	Experimental	mirtarbase		Cleft Palate, Musculoskeletal Abnormalities	FALSE	FALSE	1	-1	IPP	anticorr
hsa-mir-18a	CSRNP3	mirna-gene	Experimental	mirtarbase.adstudy	Carcinoma, Hepatocellular, Carcinoma, Hepatocellular, Colonic Neoplasms, Hematologic Neoplasms, Leukemia, B-Cell, Leukemia, B-Cell, Leukemia, B-Cell, Leukemia, B-Cell, Lung Neoplasms, Lung Neoplasms, Lung Neoplasms, Lymphoma, Lymphoma, Lymphoma, B-Cell, Neoplasms, Ovarian Neoplasms, Melanoma, Breast Neoplasms, Ovarian Neoplasms, Lymphoma, B-Cell, Colorectal Neoplasms, Stomach Neoplasms, Head and …	Abortion, Spontaneous, Substance-Related Disorders	FALSE	FALSE	1	1	IPP
hsa-mir-18a	TGFBR2	mirna-gene	Experimental	mirtarbase.adstudy	Carcinoma, Hepatocellular, Carcinoma, Hepatocellular, Colonic Neoplasms, Hematologic Neoplasms, Leukemia, B-Cell, Leukemia, B-Cell, Leukemia, B-Cell, Leukemia, B-Cell, Lung Neoplasms, Lung Neoplasms, Lung Neoplasms, Lymphoma, Lymphoma, Lymphoma, B-Cell, Neoplasms, Ovarian Neoplasms, Melanoma, Breast Neoplasms, Ovarian Neoplasms, Lymphoma, B-Cell, Colorectal Neoplasms, Stomach Neoplasms, Head and …	Loeys-Dietz Syndrome, Type 1b, Aortic aneurysm, familial thoracic 3, Liver Cirrhosis, Experimental, Marfan Syndrome, Loeys-Dietz Syndrome, Carcinoma, Aortic Aneurysm, Colonic Neoplasms, Colorectal Neoplasms, Hereditary Nonpolyposis, Prostatic Neoplasms, Aortic Aneurysm, Thoracic, Neoplasm Metastasis, Diabetic Nephropathies, ESOPHAGEAL CARCINOMA, Aneurysm, Dissecting, Colorectal Cancer, Hereditary…	FALSE	FALSE	1	1	IPP
hsa-mir-193b-3p	PLAU	mirna-gene	Experimental	mirtarbase		Alzheimer Disease, Myocardial Infarction, Asthenozoospermia, Brain Edema, Intracranial Hemorrhages, Reperfusion Injury, Thrombosis, Neoplasm Metastasis, Prostatic Neoplasms, Asthma, Adenocarcinoma, Pancreatic Neoplasms, Carcinoma, Transitional Cell, Idiopathic Pulmonary Fibrosis, Stomach Neoplasms, Liver Cirrhosis, Bone Neoplasms, Angina Pectoris, Angina, Unstable, Anuria, Arterial Occlusive Dise…	FALSE	FALSE	1	-1	IPP	anticorr
hsa-mir-19a-3p	BMPR2	mirna-gene	Experimental	mirtarbase		Pulmonary arterial hypertension, Hypertension, Pulmonary, Pulmonary Veno-Occlusive Disease, Hyperandrogenism	FALSE	FALSE	1	1	IPP
hsa-mir-19a-3p	MSMO1	mirna-gene	Experimental	mirtarbase			FALSE	FALSE	1	1	IPP
hsa-mir-19a-3p	ATXN1	mirna-gene	Experimental	mirtarbase		Spinocerebellar Ataxias	FALSE	FALSE	1	1	IPP
hsa-mir-19a-3p	TGFBR2	mirna-gene	Experimental	mirtarbase		Loeys-Dietz Syndrome, Type 1b, Aortic aneurysm, familial thoracic 3, Liver Cirrhosis, Experimental, Marfan Syndrome, Loeys-Dietz Syndrome, Carcinoma, Aortic Aneurysm, Colonic Neoplasms, Colorectal Neoplasms, Hereditary Nonpolyposis, Prostatic Neoplasms, Aortic Aneurysm, Thoracic, Neoplasm Metastasis, Diabetic Nephropathies, ESOPHAGEAL CARCINOMA, Aneurysm, Dissecting, Colorectal Cancer, Hereditary…	FALSE	FALSE	1	1	IPP
hsa-mir-19b-3p	ATXN1	mirna-gene	Experimental	mirtarbase		Spinocerebellar Ataxias	FALSE	FALSE	1	1	IPP
hsa-mir-19b-3p	BMPR2	mirna-gene	Experimental	mirtarbase		Pulmonary arterial hypertension, Hypertension, Pulmonary, Pulmonary Veno-Occlusive Disease, Hyperandrogenism	FALSE	FALSE	1	1	IPP
hsa-mir-19b-3p	ARID4B	mirna-gene	Experimental	mirtarbase		Carcinoma, Adenoid Cystic	FALSE	FALSE	1	1	IPP
hsa-mir-19b-3p	HIPK3	mirna-gene	Experimental	mirtarbase			FALSE	FALSE	1	1	IPP
hsa-mir-200a-3p	ZEB1	mirna-gene	Experimental	mirtarbase		Corneal Dystrophy, Fuchs Endothelial, 6, Corneal Dystrophy, Posterior Polymorphous, 3, Breast Neoplasms, Cell Transformation, Neoplastic, Disease Progression, Myocardial Ischemia, Neoplasm Invasiveness	FALSE	FALSE	1	1	IPP
hsa-mir-200a-3p	KLF11	mirna-gene	Experimental	mirtarbase		Maturity-Onset Diabetes of the Young, Type 7	FALSE	FALSE	-1	1	IPP	anticorr
hsa-mir-200a-3p	WASF3	mirna-gene	Experimental	mirtarbase			FALSE	FALSE	-1	1	IPP	anticorr
hsa-mir-205-5p	ZEB1	mirna-gene	Experimental	mirtarbase		Corneal Dystrophy, Fuchs Endothelial, 6, Corneal Dystrophy, Posterior Polymorphous, 3, Breast Neoplasms, Cell Transformation, Neoplastic, Disease Progression, Myocardial Ischemia, Neoplasm Invasiveness	FALSE	FALSE	1	1	IPP
hsa-mir-20a-5p	BMPR2	mirna-gene	Experimental	mirtarbase		Pulmonary arterial hypertension, Hypertension, Pulmonary, Pulmonary Veno-Occlusive Disease, Hyperandrogenism	FALSE	FALSE	1	1	IPP
hsa-mir-20a-5p	TGFBR2	mirna-gene	Experimental	mirtarbase		Loeys-Dietz Syndrome, Type 1b, Aortic aneurysm, familial thoracic 3, Liver Cirrhosis, Experimental, Marfan Syndrome, Loeys-Dietz Syndrome, Carcinoma, Aortic Aneurysm, Colonic Neoplasms, Colorectal Neoplasms, Hereditary Nonpolyposis, Prostatic Neoplasms, Aortic Aneurysm, Thoracic, Neoplasm Metastasis, Diabetic Nephropathies, ESOPHAGEAL CARCINOMA, Aneurysm, Dissecting, Colorectal Cancer, Hereditary…	FALSE	FALSE	1	1	IPP
hsa-mir-21	IL1B	mirna-gene	Experimental	mirtarbase.adstudy	Brain Neoplasms, Brain Neoplasms, Breast Neoplasms, Breast Neoplasms, Breast Neoplasms, Breast Neoplasms, Breast Neoplasms, Cholangiocarcinoma, Colonic Neoplasms, Dermatitis, Atopic, Focal Epithelial Hyperplasia, Glioblastoma, Glioblastoma, Glioblastoma, Glioblastoma, Glioblastoma, Glioblastoma, Heart Diseases, Heart Failure, Lung Neoplasms, Lung Neoplasms, Lymphoma, Large B-Cell, Diffuse, Muscul…	Alzheimer Disease, Inflammation, Pneumonia, Pulmonary Fibrosis, Myocardial Infarction, Seizures, Stomach Neoplasms, Brain Injuries, Arthritis, Experimental, Diabetes Mellitus, Experimental, Drug-Induced Liver Injury, Fever, Hyperalgesia, Mucositis, Pleurisy, Arthritis, Rheumatoid, Multiple Sclerosis, Schizophrenia, Gastritis, Atrophic, Colitis, Ulcerative, Adenocarcinoma, Dermatomyositis, Stroke,…	FALSE	FALSE	1	1	IPP
hsa-mir-21	TGFBR2	mirna-gene	Experimental	mirtarbase.adstudy	Brain Neoplasms, Brain Neoplasms, Breast Neoplasms, Breast Neoplasms, Breast Neoplasms, Breast Neoplasms, Breast Neoplasms, Cholangiocarcinoma, Colonic Neoplasms, Dermatitis, Atopic, Focal Epithelial Hyperplasia, Glioblastoma, Glioblastoma, Glioblastoma, Glioblastoma, Glioblastoma, Glioblastoma, Heart Diseases, Heart Failure, Lung Neoplasms, Lung Neoplasms, Lymphoma, Large B-Cell, Diffuse, Muscul…	Loeys-Dietz Syndrome, Type 1b, Aortic aneurysm, familial thoracic 3, Liver Cirrhosis, Experimental, Marfan Syndrome, Loeys-Dietz Syndrome, Carcinoma, Aortic Aneurysm, Colonic Neoplasms, Colorectal Neoplasms, Hereditary Nonpolyposis, Prostatic Neoplasms, Aortic Aneurysm, Thoracic, Neoplasm Metastasis, Diabetic Nephropathies, ESOPHAGEAL CARCINOMA, Aneurysm, Dissecting, Colorectal Cancer, Hereditary…	FALSE	FALSE	1	1	IPP
hsa-mir-21	BMPR2	mirna-gene	Experimental	mirtarbase.adstudy	Brain Neoplasms, Brain Neoplasms, Breast Neoplasms, Breast Neoplasms, Breast Neoplasms, Breast Neoplasms, Breast Neoplasms, Cholangiocarcinoma, Colonic Neoplasms, Dermatitis, Atopic, Focal Epithelial Hyperplasia, Glioblastoma, Glioblastoma, Glioblastoma, Glioblastoma, Glioblastoma, Glioblastoma, Heart Diseases, Heart Failure, Lung Neoplasms, Lung Neoplasms, Lymphoma, Large B-Cell, Diffuse, Muscul…	Pulmonary arterial hypertension, Hypertension, Pulmonary, Pulmonary Veno-Occlusive Disease, Hyperandrogenism	FALSE	FALSE	1	1	IPP
hsa-mir-21	HIPK3	mirna-gene	Experimental	mirrecords.adstudy	Brain Neoplasms, Brain Neoplasms, Breast Neoplasms, Breast Neoplasms, Breast Neoplasms, Breast Neoplasms, Breast Neoplasms, Cholangiocarcinoma, Colonic Neoplasms, Dermatitis, Atopic, Focal Epithelial Hyperplasia, Glioblastoma, Glioblastoma, Glioblastoma, Glioblastoma, Glioblastoma, Glioblastoma, Heart Diseases, Heart Failure, Lung Neoplasms, Lung Neoplasms, Lymphoma, Large B-Cell, Diffuse, Muscul…		FALSE	FALSE	1	1	IPP
hsa-mir-21	TNFAIP3	mirna-gene	Experimental	mirtarbase.adstudy	Brain Neoplasms, Brain Neoplasms, Breast Neoplasms, Breast Neoplasms, Breast Neoplasms, Breast Neoplasms, Breast Neoplasms, Cholangiocarcinoma, Colonic Neoplasms, Dermatitis, Atopic, Focal Epithelial Hyperplasia, Glioblastoma, Glioblastoma, Glioblastoma, Glioblastoma, Glioblastoma, Glioblastoma, Heart Diseases, Heart Failure, Lung Neoplasms, Lung Neoplasms, Lymphoma, Large B-Cell, Diffuse, Muscul…	Lupus Erythematosus, Systemic, Arthritis, Rheumatoid, Psoriasis	FALSE	FALSE	1	1	IPP
hsa-mir-21	TGFB1	mirna-gene	Experimental	mirrecords.adstudy	Brain Neoplasms, Brain Neoplasms, Breast Neoplasms, Breast Neoplasms, Breast Neoplasms, Breast Neoplasms, Breast Neoplasms, Cholangiocarcinoma, Colonic Neoplasms, Dermatitis, Atopic, Focal Epithelial Hyperplasia, Glioblastoma, Glioblastoma, Glioblastoma, Glioblastoma, Glioblastoma, Glioblastoma, Heart Diseases, Heart Failure, Lung Neoplasms, Lung Neoplasms, Lymphoma, Large B-Cell, Diffuse, Muscul…	Camurati-Engelmann Syndrome, Asthma, Pulmonary Disease, Chronic Obstructive, Hypertension, Pulmonary Fibrosis, Lung Diseases, Diabetes Mellitus, Experimental, Diabetic Neuropathies, Hernia, Diaphragmatic, Liver Cirrhosis, Experimental, Fibrosis, Osteoporosis, Carcinoma, Kidney Diseases, Carcinoma, Hepatocellular, Prostatic Neoplasms, Diabetic Nephropathies, Carcinoma, Squamous Cell, Inflammation,…	FALSE	FALSE	1	1	IPP
hsa-mir-216a	CD44	mirna-gene	Experimental	mirtarbase.adstudy	Lung Neoplasms, Melanoma, Fatty Liver, Pancreatic Neoplasms, Carcinoma, Hepatocellular, Heart Failure, Pancreatic Neoplasms, Pancreatic Neoplasms, Carcinoma, Hepatocellular	Stomach Neoplasms, Leukemia, Promyelocytic, Acute, Pancreatic Neoplasms, Skin Diseases, Acute Kidney Injury, Arsenic Poisoning, Mammary Neoplasms, Experimental, Nerve Degeneration, Peripheral Nervous System Diseases, Vitiligo	FALSE	FALSE	1	1	IPP
hsa-mir-29a	TET1	mirna-gene	Experimental	mirtarbase.adstudy	Acquired Immunodeficiency Syndrome, Heart Failure, Leukemia, Lymphocytic, Chronic, B-Cell, Lung Neoplasms, Lung Neoplasms, Neoplasms, Schizophrenia, Lymphoma, B-Cell, Alzheimer Disease, Precursor Cell Lymphoblastic Leukemia-Lymphoma, Acquired Immunodeficiency Syndrome, Breast Neoplasms, Ovarian Neoplasms, Rhabdomyosarcoma, Neoplasms, Alzheimer Disease, Endomyocardial Fibrosis, Breast Neoplasms, M…		FALSE	FALSE	1	1	IPP
hsa-mir-29a	DNMT3A	mirna-gene	Experimental	mirtarbase.adstudy	Acquired Immunodeficiency Syndrome, Heart Failure, Leukemia, Lymphocytic, Chronic, B-Cell, Lung Neoplasms, Lung Neoplasms, Neoplasms, Schizophrenia, Lymphoma, B-Cell, Alzheimer Disease, Precursor Cell Lymphoblastic Leukemia-Lymphoma, Acquired Immunodeficiency Syndrome, Breast Neoplasms, Ovarian Neoplasms, Rhabdomyosarcoma, Neoplasms, Alzheimer Disease, Endomyocardial Fibrosis, Breast Neoplasms, M…	Crohn Disease, Lung Neoplasms, Leukemia, Monocytic, Acute	FALSE	FALSE	1	1	IPP
hsa-mir-301a	SERPINE1	mirna-gene	Experimental	mirtarbase.adstudy	Salivary Gland Neoplasms, Adrenocortical Carcinoma, Lung Neoplasms, Lung Neoplasms, Breast Neoplasms, Parkinson Disease, Periodontitis, Carcinoma, Hepatocellular, Demyelinating Diseases, Prostatic Neoplasms, Stomach Neoplasms, Colorectal Neoplasms, Diabetes Mellitus	Diabetic Nephropathies, Pre-Eclampsia, Thrombosis, Atherosclerosis, Kidney Failure, Chronic, Stomach Neoplasms, Fatty Liver, Prostatic Neoplasms, Liver Neoplasms, Autistic Disorder, Behcet Syndrome, Glomerulosclerosis, Focal Segmental, Nephrotic Syndrome, Cholestasis, Diabetes Mellitus, Experimental, Nervous System Diseases, Plasminogen Activator Inhibitor-1 Deficiency	FALSE	FALSE	1	1	IPP
hsa-mir-30c-5p	SERPINE1	mirna-gene	Experimental	mirtarbase		Diabetic Nephropathies, Pre-Eclampsia, Thrombosis, Atherosclerosis, Kidney Failure, Chronic, Stomach Neoplasms, Fatty Liver, Prostatic Neoplasms, Liver Neoplasms, Autistic Disorder, Behcet Syndrome, Glomerulosclerosis, Focal Segmental, Nephrotic Syndrome, Cholestasis, Diabetes Mellitus, Experimental, Nervous System Diseases, Plasminogen Activator Inhibitor-1 Deficiency	FALSE	FALSE	1	-1	IPP	anticorr
hsa-mir-31	RHOBTB1	mirna-gene	Experimental	mirRecord	Retinal Neovascularization, Retinal Neovascularization, Colorectal Neoplasms, Colorectal Neoplasms, Stomach Neoplasms, Medulloblastoma, Lung Neoplasms, Mouth Neoplasms, Carcinoma, Myocardial Infarction, Neoplasms, Ovarian Neoplasms, Schistosomiasis, Carcinoma, Leiomyosarcoma, Breast Neoplasms, Mouth Neoplasms, Adenocarcinoma, Mesothelioma, Neoplasms, Laryngeal Neoplasms, Muscular Dystrophy, Duche…		FALSE	FALSE	1	1	IPP
hsa-mir-31	NFAT5	mirna-gene	Experimental	mirtarbase.adstudy	Retinal Neovascularization, Retinal Neovascularization, Colorectal Neoplasms, Colorectal Neoplasms, Stomach Neoplasms, Medulloblastoma, Lung Neoplasms, Mouth Neoplasms, Carcinoma, Myocardial Infarction, Neoplasms, Ovarian Neoplasms, Schistosomiasis, Carcinoma, Leiomyosarcoma, Breast Neoplasms, Mouth Neoplasms, Adenocarcinoma, Mesothelioma, Neoplasms, Laryngeal Neoplasms, Muscular Dystrophy, Duche…		FALSE	FALSE	1	1	IPP
hsa-mir-92a-3p	ARID4B	mirna-gene	Experimental	mirtarbase		Carcinoma, Adenoid Cystic	FALSE	FALSE	1	-1	IPP	anticorr
hsa-mir-92a-3p	OSBPL2	mirna-gene	Experimental	mirtarbase			FALSE	FALSE	1	-1	IPP	anticorr
hsa-mir-92a-3p	TGFBR2	mirna-gene	Experimental	mirtarbase		Loeys-Dietz Syndrome, Type 1b, Aortic aneurysm, familial thoracic 3, Liver Cirrhosis, Experimental, Marfan Syndrome, Loeys-Dietz Syndrome, Carcinoma, Aortic Aneurysm, Colonic Neoplasms, Colorectal Neoplasms, Hereditary Nonpolyposis, Prostatic Neoplasms, Aortic Aneurysm, Thoracic, Neoplasm Metastasis, Diabetic Nephropathies, ESOPHAGEAL CARCINOMA, Aneurysm, Dissecting, Colorectal Cancer, Hereditary…	FALSE	FALSE	1	-1	IPP	anticorr
hsa-mir-92a-3p	HIPK3	mirna-gene	Experimental	mirtarbase			FALSE	FALSE	1	-1	IPP	anticorr
hsa-mir-92a-3p	BMPR2	mirna-gene	Experimental	mirtarbase		Pulmonary arterial hypertension, Hypertension, Pulmonary, Pulmonary Veno-Occlusive Disease, Hyperandrogenism	FALSE	FALSE	1	-1	IPP	anticorr
ATF3	ATF3	tf-gene	Experimental	Transfac	Hypospadias, Prostatic Neoplasms, Carcinoma, Non-Small-Cell Lung, Diabetes Mellitus, Type 2, Influenza, Human, Liver Neoplasms, Diabetes Mellitus, Experimental, Infarction, Middle Cerebral Artery, Nervous System Diseases, Ovarian Neoplasms, Peripheral Nervous System Diseases	Hypospadias, Prostatic Neoplasms, Carcinoma, Non-Small-Cell Lung, Diabetes Mellitus, Type 2, Influenza, Human, Liver Neoplasms, Diabetes Mellitus, Experimental, Infarction, Middle Cerebral Artery, Nervous System Diseases, Ovarian Neoplasms, Peripheral Nervous System Diseases	FALSE	FALSE	1	1	TIBP
ETV4	ERBB2	tf-gene	Experimental	PMID20584335	Breast Neoplasms, Prostatic Neoplasms	Breast Neoplasms, Mammary Neoplasms, Experimental, Neoplasm Metastasis, Adenocarcinoma, Ovarian Neoplasms, Prostatic Neoplasms, Lung Neoplasms, Stomach Neoplasms, Cholangiocarcinoma, Glioma, Medulloblastoma, Colonic Neoplasms, Esophageal Neoplasms, Carcinoma, Renal Cell, Lymphatic Metastasis, Papilloma, Disease Progression, Gastrointestinal Neoplasms, Mammary Neoplasms, Animal, Neoplasm Recurrenc…	FALSE	FALSE	1	-1	TIBP	anticorr
FOSL1	FOSL1	tf-gene	Experimental	Transfac			FALSE	FALSE	1	1	TIBP
FOXO1	IGFBP1	tf-gene	Experimental	Transfac	Rhabdomyosarcoma, Alveolar, Leukemia, Myeloid, Acute, Keratoconus	Endometriosis, Abortion, Spontaneous, Colonic Neoplasms, Drug Toxicity, Liver Cirrhosis, Biliary, Liver Cirrhosis, Experimental, Precancerous Conditions	FALSE	FALSE	1	1	TIBP
FOXO1	G6PC	tf-gene	Experimental	Transfac	Rhabdomyosarcoma, Alveolar, Leukemia, Myeloid, Acute, Keratoconus	Glycogen Storage Disease Type I	FALSE	FALSE	1	1	TIBP
IRF3	IRF7	tf-gene	Experimental	Transfac		Influenza, Human, Inflammation	FALSE	FALSE	1	1	TIBP
IRF3	ISG15	tf-gene	Experimental	Transfac		Influenza, Human	FALSE	FALSE	1	1	TIBP
IRF7	IRF7	tf-gene	Experimental	Transfac	Influenza, Human, Inflammation	Influenza, Human, Inflammation	FALSE	FALSE	1	1	TIBP
IRF7	ISG15	tf-gene	Experimental	Transfac	Influenza, Human, Inflammation	Influenza, Human	FALSE	FALSE	1	1	TIBP
NFIC	CBS	tf-gene	Experimental	Transfac	Prostatic Neoplasms	Hyperhomocysteinemia, CYSTATHIONINE BETA-SYNTHASE, Homocystinuria, Cardiovascular Diseases, Lymphoma, Non-Hodgkin, Hypertension, Malnutrition	FALSE	FALSE	1	1	TIBP
PPARA	SEMA6B	tf-gene	Experimental	PMID20584335	Hypertension, Reperfusion Injury, Diabetes Mellitus, Type 2, Obesity, Dyslipidemias, Fatty Liver, Hyperlipidemias, Insulin Resistance, Dermatitis, Atopic, Carcinoma, Neoplasms, Inflammation, Kidney Failure, Chronic, Liver Neoplasms, Encephalomyelitis, Autoimmune, Experimental, Hepatomegaly, Hypoglycemia, Kidney Diseases, Kidney Tubular Necrosis, Acute, Muscular Diseases, Abdominal obesity metabol…		FALSE	FALSE	1	1	TIBP
RARG	RARG	tf-gene	Experimental	Transfac	Cleft Palate, Musculoskeletal Abnormalities	Cleft Palate, Musculoskeletal Abnormalities	FALSE	FALSE	1	1	TIBP
RBPJ	BCL3	tf-gene	Experimental	Transfac	Arthritis, Rheumatoid, Endometriosis		FALSE	FALSE	1	1	TIBP
RXRA	SEMA6B	tf-gene	Experimental	PMID20584335	Prostatic Neoplasms, Amyotrophic lateral sclerosis 1, Sciatic Neuropathy		FALSE	FALSE	1	1	TIBP
RXRA	INSIG1	tf-gene	Experimental	PMID20584335	Prostatic Neoplasms, Amyotrophic lateral sclerosis 1, Sciatic Neuropathy	Carcinoma, Mammary Neoplasms, Animal, Mammary Neoplasms, Experimental	FALSE	FALSE	1	1	TIBP
RXRA	RARG	tf-gene	Experimental	Transfac	Prostatic Neoplasms, Amyotrophic lateral sclerosis 1, Sciatic Neuropathy	Cleft Palate, Musculoskeletal Abnormalities	FALSE	FALSE	1	1	TIBP
RXRA	IGFBP1	tf-gene	Experimental	PMID20584335	Prostatic Neoplasms, Amyotrophic lateral sclerosis 1, Sciatic Neuropathy	Endometriosis, Abortion, Spontaneous, Colonic Neoplasms, Drug Toxicity, Liver Cirrhosis, Biliary, Liver Cirrhosis, Experimental, Precancerous Conditions	FALSE	FALSE	1	1	TIBP
VDR	IGFBP1	tf-gene	Experimental	PMID20584335	Vitamin D-Dependent Rickets, Type 2A, Osteoporosis, Rickets, Prostatic Neoplasms, Hypertension, Vitamin D Deficiency, Neoplasms, Alopecia, Uremia, Carcinoma, Transitional Cell, Epilepsy, Temporal Lobe, Genetic Diseases, Inborn, Leukemia, Lymphocytic, Chronic, B-Cell	Endometriosis, Abortion, Spontaneous, Colonic Neoplasms, Drug Toxicity, Liver Cirrhosis, Biliary, Liver Cirrhosis, Experimental, Precancerous Conditions	FALSE	FALSE	1	1	TIBP
hsa-let-7a	BCL2	mirna-gene	Experimental	mirtarbase.adstudy	Carcinoma, Non-Small-Cell Lung, Stomach Neoplasms, Stomach Neoplasms	Colonic Neoplasms, Reperfusion Injury, Alzheimer Disease, Diabetes Mellitus, Experimental, Erectile Dysfunction, Lymphoma, Follicular, Breast Neoplasms, Carcinoma, Lymphoma, Large B-Cell, Diffuse, Prostatic Neoplasms, Colorectal Neoplasms, Lymphoma, Non-Hodgkin, Adenocarcinoma, Esophageal Neoplasms, Azoospermia, Autistic Disorder, Sarcoma, Synovial, Multiple Myeloma, Adenoma, Diabetes Mellitus, T…	FALSE	FALSE	1	-1	TIBP	anticorr
hsa-let-7b	DOCK5	mirna-gene	Experimental	mirtarbase.adstudy	Colonic Neoplasms, Heart Failure, Lung Neoplasms, Lung Neoplasms, Lung Neoplasms, Lung Neoplasms, Lung Neoplasms, Lung Neoplasms, Lung Neoplasms, Neoplasms, Neoplasms, Neoplasms, Ovarian Neoplasms, Neoplasms, Digestive System Neoplasms, Head and Neck Neoplasms, Neoplasms, Sarcoma, Kaposi, Lung Neoplasms, Melanoma, Pancreatic Neoplasms, Pituitary Neoplasms, Lymphoma, Primary Effusion, Adrenocortic…		FALSE	FALSE	1	-1	TIBP	anticorr
hsa-let-7b	SLC1A4	mirna-gene	Experimental	mirtarbase.adstudy	Colonic Neoplasms, Heart Failure, Lung Neoplasms, Lung Neoplasms, Lung Neoplasms, Lung Neoplasms, Lung Neoplasms, Lung Neoplasms, Lung Neoplasms, Neoplasms, Neoplasms, Neoplasms, Ovarian Neoplasms, Neoplasms, Digestive System Neoplasms, Head and Neck Neoplasms, Neoplasms, Sarcoma, Kaposi, Lung Neoplasms, Melanoma, Pancreatic Neoplasms, Pituitary Neoplasms, Lymphoma, Primary Effusion, Adrenocortic…		FALSE	FALSE	1	-1	TIBP	anticorr
hsa-let-7b	ERC1	mirna-gene	Experimental	mirtarbase.adstudy	Colonic Neoplasms, Heart Failure, Lung Neoplasms, Lung Neoplasms, Lung Neoplasms, Lung Neoplasms, Lung Neoplasms, Lung Neoplasms, Lung Neoplasms, Neoplasms, Neoplasms, Neoplasms, Ovarian Neoplasms, Neoplasms, Digestive System Neoplasms, Head and Neck Neoplasms, Neoplasms, Sarcoma, Kaposi, Lung Neoplasms, Melanoma, Pancreatic Neoplasms, Pituitary Neoplasms, Lymphoma, Primary Effusion, Adrenocortic…		FALSE	FALSE	1	-1	TIBP	anticorr
hsa-let-7c-5p	TGFBR1	mirna-gene	Experimental	mirtarbase		LOEYS-DIETZ SYNDROME, TYPE 1A, Loeys-Dietz Syndrome, Type 2A, Keratoacanthoma familial, Colorectal Neoplasms, Loeys-Dietz Syndrome, Skin Neoplasms, Aneurysm, Dissecting, Abortion, Spontaneous, Auditory Neuropathy, Autosomal Dominant, 1, Uremia	FALSE	FALSE	1	-1	TIBP	anticorr
hsa-let-7f	FDPS	mirna-gene	Experimental	mirrecords.adstudy			FALSE	FALSE	1	-1	TIBP	anticorr
hsa-let-7f	ESM1	mirna-gene	Experimental	mirrecords.adstudy			FALSE	FALSE	1	-1	TIBP	anticorr
hsa-mir-125a	ERBB2	mirna-gene	Experimental	tarbase.adstudy	Breast Neoplasms, Breast Neoplasms, Carcinoma, Hepatocellular, Carcinoma, Hepatocellular, Heart Failure, Lung Neoplasms, Muscular Disorders, Atrophic, Ovarian Neoplasms, Endometriosis, Leukemia, Medulloblastoma, Retinal Degeneration, Ovarian Neoplasms, Breast Neoplasms, Hepatoblastoma, Atrophy, Myelodysplastic Syndromes, Carcinoma, Non-Small-Cell Lung, Carcinoma, Non-Small-Cell Lung, Carcinoma, S…	Breast Neoplasms, Mammary Neoplasms, Experimental, Neoplasm Metastasis, Adenocarcinoma, Ovarian Neoplasms, Prostatic Neoplasms, Lung Neoplasms, Stomach Neoplasms, Cholangiocarcinoma, Glioma, Medulloblastoma, Colonic Neoplasms, Esophageal Neoplasms, Carcinoma, Renal Cell, Lymphatic Metastasis, Papilloma, Disease Progression, Gastrointestinal Neoplasms, Mammary Neoplasms, Animal, Neoplasm Recurrenc…	FALSE	FALSE	1	-1	TIBP	anticorr
hsa-mir-125b-5p	VDR	mirna-gene	Experimental	mirtarbase		Vitamin D-Dependent Rickets, Type 2A, Osteoporosis, Rickets, Prostatic Neoplasms, Hypertension, Vitamin D Deficiency, Neoplasms, Alopecia, Uremia, Carcinoma, Transitional Cell, Epilepsy, Temporal Lobe, Genetic Diseases, Inborn, Leukemia, Lymphocytic, Chronic, B-Cell	FALSE	FALSE	1	-1	TIBP	anticorr
hsa-mir-125b-5p	BCL2	mirna-gene	Experimental	mirtarbase		Colonic Neoplasms, Reperfusion Injury, Alzheimer Disease, Diabetes Mellitus, Experimental, Erectile Dysfunction, Lymphoma, Follicular, Breast Neoplasms, Carcinoma, Lymphoma, Large B-Cell, Diffuse, Prostatic Neoplasms, Colorectal Neoplasms, Lymphoma, Non-Hodgkin, Adenocarcinoma, Esophageal Neoplasms, Azoospermia, Autistic Disorder, Sarcoma, Synovial, Multiple Myeloma, Adenoma, Diabetes Mellitus, T…	FALSE	FALSE	1	-1	TIBP	anticorr
hsa-mir-125b-5p	KLF13	mirna-gene	Experimental	mirtarbase		Endometriosis	FALSE	FALSE	1	-1	TIBP	anticorr
hsa-mir-125b-5p	BCL3	mirna-gene	Experimental	mirtarbase			FALSE	FALSE	1	-1	TIBP	anticorr
hsa-mir-125b-5p	ERBB2	mirna-gene	Experimental	mirtarbase		Breast Neoplasms, Mammary Neoplasms, Experimental, Neoplasm Metastasis, Adenocarcinoma, Ovarian Neoplasms, Prostatic Neoplasms, Lung Neoplasms, Stomach Neoplasms, Cholangiocarcinoma, Glioma, Medulloblastoma, Colonic Neoplasms, Esophageal Neoplasms, Carcinoma, Renal Cell, Lymphatic Metastasis, Papilloma, Disease Progression, Gastrointestinal Neoplasms, Mammary Neoplasms, Animal, Neoplasm Recurrenc…	FALSE	FALSE	1	-1	TIBP	anticorr
hsa-mir-125b-5p	TNFAIP3	mirna-gene	Experimental	mirtarbase		Lupus Erythematosus, Systemic, Arthritis, Rheumatoid, Psoriasis	FALSE	FALSE	1	-1	TIBP	anticorr
hsa-mir-129-5p	BMPR2	mirna-gene	Experimental	mirtarbase.adstudy		Pulmonary arterial hypertension, Hypertension, Pulmonary, Pulmonary Veno-Occlusive Disease, Hyperandrogenism	FALSE	FALSE	1	-1	TIBP	anticorr
hsa-mir-138-5p	MXD1	mirna-gene	Experimental	mirtarbase		Dermatitis, Allergic Contact	FALSE	FALSE	1	1	TIBP
hsa-mir-138-5p	IGF1R	mirna-gene	Experimental	mirtarbase		Insulin-Like Growth Factor I, Resistance To, Parkinson Disease, Breast Neoplasms, Carcinoma, Hepatocellular, Alzheimer Disease, Fetal Growth Retardation, Congenital diaphragmatic hernia, Endometrial Neoplasms, Growth Disorders, Lewy Body Disease, Lung Diseases, Peripheral Nervous System Diseases, Respiratory Insufficiency, Skin Neoplasms	FALSE	FALSE	1	1	TIBP
hsa-mir-141-3p	CLOCK	mirna-gene	Experimental	mirtarbase			FALSE	FALSE	1	1	TIBP
hsa-mir-141-3p	KLF11	mirna-gene	Experimental	mirtarbase		Maturity-Onset Diabetes of the Young, Type 7	FALSE	FALSE	-1	1	TIBP	anticorr
hsa-mir-141-3p	ZEB1	mirna-gene	Experimental	mirtarbase		Corneal Dystrophy, Fuchs Endothelial, 6, Corneal Dystrophy, Posterior Polymorphous, 3, Breast Neoplasms, Cell Transformation, Neoplastic, Disease Progression, Myocardial Ischemia, Neoplasm Invasiveness	FALSE	FALSE	1	1	TIBP
hsa-mir-141-3p	PPARA	mirna-gene	Experimental	mirtarbase		Hypertension, Reperfusion Injury, Diabetes Mellitus, Type 2, Obesity, Dyslipidemias, Fatty Liver, Hyperlipidemias, Insulin Resistance, Dermatitis, Atopic, Carcinoma, Neoplasms, Inflammation, Kidney Failure, Chronic, Liver Neoplasms, Encephalomyelitis, Autoimmune, Experimental, Hepatomegaly, Hypoglycemia, Kidney Diseases, Kidney Tubular Necrosis, Acute, Muscular Diseases, Abdominal obesity metabol…	FALSE	FALSE	1	1	TIBP
hsa-mir-143	DNMT3A	mirna-gene	Experimental	mirtarbase.adstudy	Breast Neoplasms, Colonic Neoplasms, Colonic Neoplasms, Colonic Neoplasms, Colonic Neoplasms, Colonic Neoplasms, Colorectal Neoplasms, Hepatitis, Chronic, Hepatitis, Chronic, Lung Neoplasms, Muscular Disorders, Atrophic, Obesity, ACTH-Secreting Pituitary Adenoma, Barrett Esophagus, Urinary Bladder Neoplasms, Uterine Cervical Neoplasms, Colorectal Neoplasms, Colorectal Neoplasms, Endometriosis, Ob…	Crohn Disease, Lung Neoplasms, Leukemia, Monocytic, Acute	FALSE	FALSE	1	1	TIBP
hsa-mir-146a	CXCR4	mirna-gene	Experimental	mirtarbase.adstudy	Breast Neoplasms, Leukemia, Lymphocytic, Chronic, B-Cell, Lung Neoplasms, Muscular Disorders, Atrophic, Pancreatic Neoplasms, Prostatic Neoplasms, Psoriasis, Psoriasis, Thyroid Neoplasms, Thyroid Neoplasms, Thyroid Neoplasms, Thyroid Neoplasms, Thyroid Neoplasms, Lymphoma, B-Cell, Burkitt Lymphoma, Eczema, Alzheimer Disease, Autistic Disorder, Breast Neoplasms, Breast Neoplasms, Breast Neoplasms,…	WHIM syndrome, Neoplasm Metastasis, Neuralgia	FALSE	FALSE	1	1	TIBP
hsa-mir-15b-5p	BCL2	mirna-gene	Experimental	mirtarbase		Colonic Neoplasms, Reperfusion Injury, Alzheimer Disease, Diabetes Mellitus, Experimental, Erectile Dysfunction, Lymphoma, Follicular, Breast Neoplasms, Carcinoma, Lymphoma, Large B-Cell, Diffuse, Prostatic Neoplasms, Colorectal Neoplasms, Lymphoma, Non-Hodgkin, Adenocarcinoma, Esophageal Neoplasms, Azoospermia, Autistic Disorder, Sarcoma, Synovial, Multiple Myeloma, Adenoma, Diabetes Mellitus, T…	FALSE	FALSE	1	1	TIBP
hsa-mir-181b-5p	BCL2	mirna-gene	Experimental	mirtarbase		Colonic Neoplasms, Reperfusion Injury, Alzheimer Disease, Diabetes Mellitus, Experimental, Erectile Dysfunction, Lymphoma, Follicular, Breast Neoplasms, Carcinoma, Lymphoma, Large B-Cell, Diffuse, Prostatic Neoplasms, Colorectal Neoplasms, Lymphoma, Non-Hodgkin, Adenocarcinoma, Esophageal Neoplasms, Azoospermia, Autistic Disorder, Sarcoma, Synovial, Multiple Myeloma, Adenoma, Diabetes Mellitus, T…	FALSE	FALSE	1	-1	TIBP	anticorr
hsa-mir-181b-5p	IGF1R	mirna-gene	Experimental	mirtarbase		Insulin-Like Growth Factor I, Resistance To, Parkinson Disease, Breast Neoplasms, Carcinoma, Hepatocellular, Alzheimer Disease, Fetal Growth Retardation, Congenital diaphragmatic hernia, Endometrial Neoplasms, Growth Disorders, Lewy Body Disease, Lung Diseases, Peripheral Nervous System Diseases, Respiratory Insufficiency, Skin Neoplasms	FALSE	FALSE	1	-1	TIBP	anticorr
hsa-mir-181b-5p	CBX7	mirna-gene	Experimental	mirtarbase			FALSE	FALSE	1	-1	TIBP	anticorr
hsa-mir-181b-5p	MAP3K10	mirna-gene	Experimental	mirtarbase			FALSE	FALSE	1	-1	TIBP	anticorr
hsa-mir-181c-5p	BMPR2	mirna-gene	Experimental	mirtarbase		Pulmonary arterial hypertension, Hypertension, Pulmonary, Pulmonary Veno-Occlusive Disease, Hyperandrogenism	FALSE	FALSE	1	-1	TIBP	anticorr
hsa-mir-181c-5p	BCL2	mirna-gene	Experimental	mirtarbase		Colonic Neoplasms, Reperfusion Injury, Alzheimer Disease, Diabetes Mellitus, Experimental, Erectile Dysfunction, Lymphoma, Follicular, Breast Neoplasms, Carcinoma, Lymphoma, Large B-Cell, Diffuse, Prostatic Neoplasms, Colorectal Neoplasms, Lymphoma, Non-Hodgkin, Adenocarcinoma, Esophageal Neoplasms, Azoospermia, Autistic Disorder, Sarcoma, Synovial, Multiple Myeloma, Adenoma, Diabetes Mellitus, T…	FALSE	FALSE	1	-1	TIBP	anticorr
hsa-mir-182-5p	BCL2	mirna-gene	Experimental	mirtarbase		Colonic Neoplasms, Reperfusion Injury, Alzheimer Disease, Diabetes Mellitus, Experimental, Erectile Dysfunction, Lymphoma, Follicular, Breast Neoplasms, Carcinoma, Lymphoma, Large B-Cell, Diffuse, Prostatic Neoplasms, Colorectal Neoplasms, Lymphoma, Non-Hodgkin, Adenocarcinoma, Esophageal Neoplasms, Azoospermia, Autistic Disorder, Sarcoma, Synovial, Multiple Myeloma, Adenoma, Diabetes Mellitus, T…	FALSE	FALSE	1	-1	TIBP	anticorr
hsa-mir-182-5p	CLOCK	mirna-gene	Experimental	mirtarbase			FALSE	FALSE	1	-1	TIBP	anticorr
hsa-mir-182-5p	RARG	mirna-gene	Experimental	mirtarbase		Cleft Palate, Musculoskeletal Abnormalities	FALSE	FALSE	1	-1	TIBP	anticorr
hsa-mir-182-5p	FOXO1	mirna-gene	Experimental	mirtarbase		Rhabdomyosarcoma, Alveolar, Leukemia, Myeloid, Acute, Keratoconus	FALSE	FALSE	1	-1	TIBP	anticorr
hsa-mir-183-5p	FOXO1	mirna-gene	Experimental	mirtarbase		Rhabdomyosarcoma, Alveolar, Leukemia, Myeloid, Acute, Keratoconus	FALSE	FALSE	1	-1	TIBP	anticorr
hsa-mir-18a	CSRNP3	mirna-gene	Experimental	mirtarbase.adstudy	Carcinoma, Hepatocellular, Carcinoma, Hepatocellular, Colonic Neoplasms, Hematologic Neoplasms, Leukemia, B-Cell, Leukemia, B-Cell, Leukemia, B-Cell, Leukemia, B-Cell, Lung Neoplasms, Lung Neoplasms, Lung Neoplasms, Lymphoma, Lymphoma, Lymphoma, B-Cell, Neoplasms, Ovarian Neoplasms, Melanoma, Breast Neoplasms, Ovarian Neoplasms, Lymphoma, B-Cell, Colorectal Neoplasms, Stomach Neoplasms, Head and …	Abortion, Spontaneous, Substance-Related Disorders	FALSE	FALSE	1	1	TIBP
hsa-mir-192	RANBP3	mirna-gene	Experimental	mirtarbase.adstudy	Heart Failure, Lung Neoplasms, Lung Neoplasms, Colonic Neoplasms, Adrenocortical Carcinoma, Nephrosclerosis, Adenocarcinoma, Fibrosis, Reperfusion Injury, Carcinoma, Multiple Myeloma, Lupus Erythematosus, Systemic, Retinoblastoma, Carcinoma, Hepatocellular, Pancreatic Neoplasms, Muscular Dystrophies, Drug-Induced Liver Injury, Barrett Esophagus, Carcinoma, Hepatocellular, Stomach Neoplasms, Diabe…		FALSE	FALSE	1	1	TIBP
hsa-mir-192	PDE2A	mirna-gene	Experimental	mirtarbase.adstudy	Heart Failure, Lung Neoplasms, Lung Neoplasms, Colonic Neoplasms, Adrenocortical Carcinoma, Nephrosclerosis, Adenocarcinoma, Fibrosis, Reperfusion Injury, Carcinoma, Multiple Myeloma, Lupus Erythematosus, Systemic, Retinoblastoma, Carcinoma, Hepatocellular, Pancreatic Neoplasms, Muscular Dystrophies, Drug-Induced Liver Injury, Barrett Esophagus, Carcinoma, Hepatocellular, Stomach Neoplasms, Diabe…	Breast Neoplasms	FALSE	FALSE	1	1	TIBP
hsa-mir-192	BCL2	mirna-gene	Experimental	mirtarbase.adstudy	Heart Failure, Lung Neoplasms, Lung Neoplasms, Colonic Neoplasms, Adrenocortical Carcinoma, Nephrosclerosis, Adenocarcinoma, Fibrosis, Reperfusion Injury, Carcinoma, Multiple Myeloma, Lupus Erythematosus, Systemic, Retinoblastoma, Carcinoma, Hepatocellular, Pancreatic Neoplasms, Muscular Dystrophies, Drug-Induced Liver Injury, Barrett Esophagus, Carcinoma, Hepatocellular, Stomach Neoplasms, Diabe…	Colonic Neoplasms, Reperfusion Injury, Alzheimer Disease, Diabetes Mellitus, Experimental, Erectile Dysfunction, Lymphoma, Follicular, Breast Neoplasms, Carcinoma, Lymphoma, Large B-Cell, Diffuse, Prostatic Neoplasms, Colorectal Neoplasms, Lymphoma, Non-Hodgkin, Adenocarcinoma, Esophageal Neoplasms, Azoospermia, Autistic Disorder, Sarcoma, Synovial, Multiple Myeloma, Adenoma, Diabetes Mellitus, T…	FALSE	FALSE	1	1	TIBP
hsa-mir-196a-5p	ANXA1	mirna-gene	Experimental	mirtarbase		Neoplasm Metastasis, Mammary Neoplasms, Experimental, Carcinoma, Squamous Cell, Prostatic Neoplasms, Carcinoma, Adenocarcinoma of lung, Esophageal Squamous Cell Carcinoma, Lymphatic Metastasis, Craniofacial Abnormalities, Kidney Diseases, Mammary Neoplasms, Animal, Mouth Neoplasms, Neoplasm Invasiveness, Stomach Diseases	FALSE	FALSE	-1	-1	TIBP
hsa-mir-196a-5p	HMOX1	mirna-gene	Experimental	mirtarbase		Hypertension, Ischemia, Myocardial Ischemia, Reperfusion Injury, Colitis, Diabetes Mellitus, Experimental, Liver Cirrhosis, Experimental, Status Epilepticus, Alzheimer Disease, Coronary Artery Disease, Diabetes Mellitus, Type 2, Parkinson Disease, Inflammation, Asthma, Stomach Neoplasms, Pulmonary Disease, Chronic Obstructive, Breast Neoplasms, Pneumonia, Obesity, Fibrosis, Hyperplasia, Wounds an…	FALSE	FALSE	1	-1	TIBP	anticorr
hsa-mir-19a-3p	MSMO1	mirna-gene	Experimental	mirtarbase			FALSE	FALSE	1	1	TIBP
hsa-mir-19a-3p	ATXN1	mirna-gene	Experimental	mirtarbase		Spinocerebellar Ataxias	FALSE	FALSE	1	1	TIBP
hsa-mir-19a-3p	BMPR2	mirna-gene	Experimental	mirtarbase		Pulmonary arterial hypertension, Hypertension, Pulmonary, Pulmonary Veno-Occlusive Disease, Hyperandrogenism	FALSE	FALSE	1	1	TIBP
hsa-mir-19b-3p	ARID4B	mirna-gene	Experimental	mirtarbase		Carcinoma, Adenoid Cystic	FALSE	FALSE	1	1	TIBP
hsa-mir-19b-3p	ATXN1	mirna-gene	Experimental	mirtarbase		Spinocerebellar Ataxias	FALSE	FALSE	1	1	TIBP
hsa-mir-19b-3p	HIPK3	mirna-gene	Experimental	mirtarbase			FALSE	FALSE	1	1	TIBP
hsa-mir-19b-3p	BMPR2	mirna-gene	Experimental	mirtarbase		Pulmonary arterial hypertension, Hypertension, Pulmonary, Pulmonary Veno-Occlusive Disease, Hyperandrogenism	FALSE	FALSE	1	1	TIBP
hsa-mir-200a-3p	ZEB1	mirna-gene	Experimental	mirtarbase		Corneal Dystrophy, Fuchs Endothelial, 6, Corneal Dystrophy, Posterior Polymorphous, 3, Breast Neoplasms, Cell Transformation, Neoplastic, Disease Progression, Myocardial Ischemia, Neoplasm Invasiveness	FALSE	FALSE	1	1	TIBP
hsa-mir-200a-3p	KLF11	mirna-gene	Experimental	mirtarbase		Maturity-Onset Diabetes of the Young, Type 7	FALSE	FALSE	-1	1	TIBP	anticorr
hsa-mir-200a-3p	WASF3	mirna-gene	Experimental	mirtarbase			FALSE	FALSE	-1	1	TIBP	anticorr
hsa-mir-21	BCL2	mirna-gene	Experimental	mirtarbase.adstudy	Brain Neoplasms, Brain Neoplasms, Breast Neoplasms, Breast Neoplasms, Breast Neoplasms, Breast Neoplasms, Breast Neoplasms, Cholangiocarcinoma, Colonic Neoplasms, Dermatitis, Atopic, Focal Epithelial Hyperplasia, Glioblastoma, Glioblastoma, Glioblastoma, Glioblastoma, Glioblastoma, Glioblastoma, Heart Diseases, Heart Failure, Lung Neoplasms, Lung Neoplasms, Lymphoma, Large B-Cell, Diffuse, Muscul…	Colonic Neoplasms, Reperfusion Injury, Alzheimer Disease, Diabetes Mellitus, Experimental, Erectile Dysfunction, Lymphoma, Follicular, Breast Neoplasms, Carcinoma, Lymphoma, Large B-Cell, Diffuse, Prostatic Neoplasms, Colorectal Neoplasms, Lymphoma, Non-Hodgkin, Adenocarcinoma, Esophageal Neoplasms, Azoospermia, Autistic Disorder, Sarcoma, Synovial, Multiple Myeloma, Adenoma, Diabetes Mellitus, T…	FALSE	FALSE	1	1	TIBP
hsa-mir-21	HIPK3	mirna-gene	Experimental	mirrecords.adstudy	Brain Neoplasms, Brain Neoplasms, Breast Neoplasms, Breast Neoplasms, Breast Neoplasms, Breast Neoplasms, Breast Neoplasms, Cholangiocarcinoma, Colonic Neoplasms, Dermatitis, Atopic, Focal Epithelial Hyperplasia, Glioblastoma, Glioblastoma, Glioblastoma, Glioblastoma, Glioblastoma, Glioblastoma, Heart Diseases, Heart Failure, Lung Neoplasms, Lung Neoplasms, Lymphoma, Large B-Cell, Diffuse, Muscul…		FALSE	FALSE	1	1	TIBP
hsa-mir-21	BMPR2	mirna-gene	Experimental	mirtarbase.adstudy	Brain Neoplasms, Brain Neoplasms, Breast Neoplasms, Breast Neoplasms, Breast Neoplasms, Breast Neoplasms, Breast Neoplasms, Cholangiocarcinoma, Colonic Neoplasms, Dermatitis, Atopic, Focal Epithelial Hyperplasia, Glioblastoma, Glioblastoma, Glioblastoma, Glioblastoma, Glioblastoma, Glioblastoma, Heart Diseases, Heart Failure, Lung Neoplasms, Lung Neoplasms, Lymphoma, Large B-Cell, Diffuse, Muscul…	Pulmonary arterial hypertension, Hypertension, Pulmonary, Pulmonary Veno-Occlusive Disease, Hyperandrogenism	FALSE	FALSE	1	1	TIBP
hsa-mir-21	PPARA	mirna-gene	Experimental	mirRecord	Brain Neoplasms, Brain Neoplasms, Breast Neoplasms, Breast Neoplasms, Breast Neoplasms, Breast Neoplasms, Breast Neoplasms, Cholangiocarcinoma, Colonic Neoplasms, Dermatitis, Atopic, Focal Epithelial Hyperplasia, Glioblastoma, Glioblastoma, Glioblastoma, Glioblastoma, Glioblastoma, Glioblastoma, Heart Diseases, Heart Failure, Lung Neoplasms, Lung Neoplasms, Lymphoma, Large B-Cell, Diffuse, Muscul…	Hypertension, Reperfusion Injury, Diabetes Mellitus, Type 2, Obesity, Dyslipidemias, Fatty Liver, Hyperlipidemias, Insulin Resistance, Dermatitis, Atopic, Carcinoma, Neoplasms, Inflammation, Kidney Failure, Chronic, Liver Neoplasms, Encephalomyelitis, Autoimmune, Experimental, Hepatomegaly, Hypoglycemia, Kidney Diseases, Kidney Tubular Necrosis, Acute, Muscular Diseases, Abdominal obesity metabol…	FALSE	FALSE	1	1	TIBP
hsa-mir-21	SOCS5	mirna-gene	Experimental	mirrecords.adstudy	Brain Neoplasms, Brain Neoplasms, Breast Neoplasms, Breast Neoplasms, Breast Neoplasms, Breast Neoplasms, Breast Neoplasms, Cholangiocarcinoma, Colonic Neoplasms, Dermatitis, Atopic, Focal Epithelial Hyperplasia, Glioblastoma, Glioblastoma, Glioblastoma, Glioblastoma, Glioblastoma, Glioblastoma, Heart Diseases, Heart Failure, Lung Neoplasms, Lung Neoplasms, Lymphoma, Large B-Cell, Diffuse, Muscul…		FALSE	FALSE	1	1	TIBP
hsa-mir-21	TGFBR3	mirna-gene	Experimental	mirtarbase.adstudy	Brain Neoplasms, Brain Neoplasms, Breast Neoplasms, Breast Neoplasms, Breast Neoplasms, Breast Neoplasms, Breast Neoplasms, Cholangiocarcinoma, Colonic Neoplasms, Dermatitis, Atopic, Focal Epithelial Hyperplasia, Glioblastoma, Glioblastoma, Glioblastoma, Glioblastoma, Glioblastoma, Glioblastoma, Heart Diseases, Heart Failure, Lung Neoplasms, Lung Neoplasms, Lymphoma, Large B-Cell, Diffuse, Muscul…		FALSE	FALSE	1	1	TIBP
hsa-mir-21	ERBB2	mirna-gene	Experimental	mirtarbase.adstudy	Brain Neoplasms, Brain Neoplasms, Breast Neoplasms, Breast Neoplasms, Breast Neoplasms, Breast Neoplasms, Breast Neoplasms, Cholangiocarcinoma, Colonic Neoplasms, Dermatitis, Atopic, Focal Epithelial Hyperplasia, Glioblastoma, Glioblastoma, Glioblastoma, Glioblastoma, Glioblastoma, Glioblastoma, Heart Diseases, Heart Failure, Lung Neoplasms, Lung Neoplasms, Lymphoma, Large B-Cell, Diffuse, Muscul…	Breast Neoplasms, Mammary Neoplasms, Experimental, Neoplasm Metastasis, Adenocarcinoma, Ovarian Neoplasms, Prostatic Neoplasms, Lung Neoplasms, Stomach Neoplasms, Cholangiocarcinoma, Glioma, Medulloblastoma, Colonic Neoplasms, Esophageal Neoplasms, Carcinoma, Renal Cell, Lymphatic Metastasis, Papilloma, Disease Progression, Gastrointestinal Neoplasms, Mammary Neoplasms, Animal, Neoplasm Recurrenc…	FALSE	FALSE	1	1	TIBP
hsa-mir-21	TNFAIP3	mirna-gene	Experimental	mirtarbase.adstudy	Brain Neoplasms, Brain Neoplasms, Breast Neoplasms, Breast Neoplasms, Breast Neoplasms, Breast Neoplasms, Breast Neoplasms, Cholangiocarcinoma, Colonic Neoplasms, Dermatitis, Atopic, Focal Epithelial Hyperplasia, Glioblastoma, Glioblastoma, Glioblastoma, Glioblastoma, Glioblastoma, Glioblastoma, Heart Diseases, Heart Failure, Lung Neoplasms, Lung Neoplasms, Lymphoma, Large B-Cell, Diffuse, Muscul…	Lupus Erythematosus, Systemic, Arthritis, Rheumatoid, Psoriasis	FALSE	FALSE	1	1	TIBP
ATF3	ATF3	tf-gene	Experimental	Transfac	Hypospadias, Prostatic Neoplasms, Carcinoma, Non-Small-Cell Lung, Diabetes Mellitus, Type 2, Influenza, Human, Liver Neoplasms, Diabetes Mellitus, Experimental, Infarction, Middle Cerebral Artery, Nervous System Diseases, Ovarian Neoplasms, Peripheral Nervous System Diseases	Hypospadias, Prostatic Neoplasms, Carcinoma, Non-Small-Cell Lung, Diabetes Mellitus, Type 2, Influenza, Human, Liver Neoplasms, Diabetes Mellitus, Experimental, Infarction, Middle Cerebral Artery, Nervous System Diseases, Ovarian Neoplasms, Peripheral Nervous System Diseases	FALSE	FALSE	1	1	TDBPP
ATF3	TP53	tf-gene	Experimental	Transfac	Hypospadias, Prostatic Neoplasms, Carcinoma, Non-Small-Cell Lung, Diabetes Mellitus, Type 2, Influenza, Human, Liver Neoplasms, Diabetes Mellitus, Experimental, Infarction, Middle Cerebral Artery, Nervous System Diseases, Ovarian Neoplasms, Peripheral Nervous System Diseases	Adenocarcinoma, Carcinoma, Hepatocellular, Carcinoma, Squamous Cell, Small Cell Lung Carcinoma, Carcinoma, Breast Neoplasms, Ischemia, Li-Fraumeni Syndrome, Sarcoma family syndrome of Li and Fraumeni, Glioma, Neoplasm Metastasis, Melanoma, Stomach Neoplasms, Sarcoma, Lung Neoplasms, Colorectal Neoplasms, Leukemia, Lymphocytic, Chronic, B-Cell, Carcinoma, Non-Small-Cell Lung, Colonic Neoplasms, Ad…	FALSE	FALSE	1	1	TDBPP
FOS	FOSL1	tf-gene	Experimental	Transfac	Hypertension, Reperfusion Injury, Carcinoma, Hepatocellular, Breast Neoplasms, Endometriosis, Seizures, Amphetamine-Related Disorders, Amyotrophic lateral sclerosis 1, Anxiety Disorders, Brain Injuries, Cocaine-Related Disorders, Epilepsy, Fibrous Dysplasia of Bone, Hemorrhage, Hyperkinesis, Infarction, Middle Cerebral Artery, Lung Neoplasms, Nervous System Diseases, Neurotoxicity Syndromes, Stat…		FALSE	FALSE	1	1	TDBPP
FOS	TP53	tf-gene	Experimental	Transfac	Hypertension, Reperfusion Injury, Carcinoma, Hepatocellular, Breast Neoplasms, Endometriosis, Seizures, Amphetamine-Related Disorders, Amyotrophic lateral sclerosis 1, Anxiety Disorders, Brain Injuries, Cocaine-Related Disorders, Epilepsy, Fibrous Dysplasia of Bone, Hemorrhage, Hyperkinesis, Infarction, Middle Cerebral Artery, Lung Neoplasms, Nervous System Diseases, Neurotoxicity Syndromes, Stat…	Adenocarcinoma, Carcinoma, Hepatocellular, Carcinoma, Squamous Cell, Small Cell Lung Carcinoma, Carcinoma, Breast Neoplasms, Ischemia, Li-Fraumeni Syndrome, Sarcoma family syndrome of Li and Fraumeni, Glioma, Neoplasm Metastasis, Melanoma, Stomach Neoplasms, Sarcoma, Lung Neoplasms, Colorectal Neoplasms, Leukemia, Lymphocytic, Chronic, B-Cell, Carcinoma, Non-Small-Cell Lung, Colonic Neoplasms, Ad…	FALSE	FALSE	1	1	TDBPP
FOS	FOS	tf-gene	Experimental	Transfac	Hypertension, Reperfusion Injury, Carcinoma, Hepatocellular, Breast Neoplasms, Endometriosis, Seizures, Amphetamine-Related Disorders, Amyotrophic lateral sclerosis 1, Anxiety Disorders, Brain Injuries, Cocaine-Related Disorders, Epilepsy, Fibrous Dysplasia of Bone, Hemorrhage, Hyperkinesis, Infarction, Middle Cerebral Artery, Lung Neoplasms, Nervous System Diseases, Neurotoxicity Syndromes, Stat…	Hypertension, Reperfusion Injury, Carcinoma, Hepatocellular, Breast Neoplasms, Endometriosis, Seizures, Amphetamine-Related Disorders, Amyotrophic lateral sclerosis 1, Anxiety Disorders, Brain Injuries, Cocaine-Related Disorders, Epilepsy, Fibrous Dysplasia of Bone, Hemorrhage, Hyperkinesis, Infarction, Middle Cerebral Artery, Lung Neoplasms, Nervous System Diseases, Neurotoxicity Syndromes, Stat…	FALSE	FALSE	1	1	TDBPP
FOSL1	FOSL1	tf-gene	Experimental	Transfac			FALSE	FALSE	1	1	TDBPP
FOSL2	CSH1	tf-gene	Experimental	PMID20584335		Silver-Russell Syndrome	FALSE	FALSE	-1	1	TDBPP	anticorr
FOSL2	FOSL1	tf-gene	Experimental	Transfac			FALSE	FALSE	1	1	TDBPP
IRF3	ISG15	tf-gene	Experimental	Transfac		Influenza, Human	FALSE	FALSE	1	1	TDBPP
IRF9	ISG15	tf-gene	Experimental	Transfac		Influenza, Human	FALSE	FALSE	1	1	TDBPP
JUNB	FOSL1	tf-gene	Experimental	Transfac	Myocardial Ischemia, Infarction, Middle Cerebral Artery, Lung Neoplasms, Status Epilepticus		FALSE	FALSE	1	1	TDBPP
NFIC	CDKN1A	tf-gene	Experimental	PMID20584335	Prostatic Neoplasms	Colonic Neoplasms, Prostatic Neoplasms, Urinary Bladder Neoplasms, Lung Neoplasms, Papilloma, Stomach Neoplasms, Esophageal Squamous Cell Carcinoma, Carcinoma, Transitional Cell, Intestinal Neoplasms, HIV Infections, Kidney Diseases, Muscular Dystrophy, Facioscapulohumeral, Reperfusion Injury	FALSE	FALSE	1	1	TDBPP
NFIC	TP53	tf-gene	Experimental	Transfac	Prostatic Neoplasms	Adenocarcinoma, Carcinoma, Hepatocellular, Carcinoma, Squamous Cell, Small Cell Lung Carcinoma, Carcinoma, Breast Neoplasms, Ischemia, Li-Fraumeni Syndrome, Sarcoma family syndrome of Li and Fraumeni, Glioma, Neoplasm Metastasis, Melanoma, Stomach Neoplasms, Sarcoma, Lung Neoplasms, Colorectal Neoplasms, Leukemia, Lymphocytic, Chronic, B-Cell, Carcinoma, Non-Small-Cell Lung, Colonic Neoplasms, Ad…	FALSE	FALSE	1	1	TDBPP
NFIC	SERPINE1	tf-gene	Experimental	PMID20584335	Prostatic Neoplasms	Diabetic Nephropathies, Pre-Eclampsia, Thrombosis, Atherosclerosis, Kidney Failure, Chronic, Stomach Neoplasms, Fatty Liver, Prostatic Neoplasms, Liver Neoplasms, Autistic Disorder, Behcet Syndrome, Glomerulosclerosis, Focal Segmental, Nephrotic Syndrome, Cholestasis, Diabetes Mellitus, Experimental, Nervous System Diseases, Plasminogen Activator Inhibitor-1 Deficiency	FALSE	FALSE	1	1	TDBPP
NFIC	GFAP	tf-gene	Experimental	Transfac	Prostatic Neoplasms	Alexander Disease, Amyotrophic Lateral Sclerosis, Gliosis, Nervous System Diseases, Neuromyelitis Optica, Epilepsy, Parkinson Disease, Amyotrophic lateral sclerosis 1, Ceroid lipofuscinosis, neuronal 1, infantile, Lewy Body Disease, Peripheral Nervous System Diseases, Spina Bifida Cystica	FALSE	FALSE	-1	1	TDBPP	anticorr
NFIC	FN1	tf-gene	Experimental	Transfac	Prostatic Neoplasms	Glomerulopathy with fibronectin deposits, Carcinoma, Diabetes Mellitus, Crohn Disease, Glioblastoma, Hypertension, Aortic Valve Insufficiency, Glomerulosclerosis, Focal Segmental, Abortion, Spontaneous, Hypertrophy, Left Ventricular, Mammary Neoplasms, Animal, Mammary Neoplasms, Experimental	FALSE	FALSE	1	1	TDBPP
NR1H4	PPARA	tf-gene	Experimental	Transfac	Liver Diseases, Cholestasis, Liver Neoplasms, Crohn Disease, Extravasation of Diagnostic and Therapeutic Materials, Intestinal Neoplasms	Hypertension, Reperfusion Injury, Diabetes Mellitus, Type 2, Obesity, Dyslipidemias, Fatty Liver, Hyperlipidemias, Insulin Resistance, Dermatitis, Atopic, Carcinoma, Neoplasms, Inflammation, Kidney Failure, Chronic, Liver Neoplasms, Encephalomyelitis, Autoimmune, Experimental, Hepatomegaly, Hypoglycemia, Kidney Diseases, Kidney Tubular Necrosis, Acute, Muscular Diseases, Abdominal obesity metabol…	FALSE	FALSE	1	-1	TDBPP	anticorr
NR1H4	hsa-mir-34a	tf-mirna	Experimental	Transmir	Liver Diseases, Cholestasis, Liver Neoplasms, Crohn Disease, Extravasation of Diagnostic and Therapeutic Materials, Intestinal Neoplasms	Breast Neoplasms, Colonic Neoplasms, Lung Neoplasms, Muscular Disorders, Atrophic, Neuroblastoma, Lymphoma, B-Cell, Leukemia, Promyelocytic, Acute, Precursor Cell Lymphoblastic Leukemia-Lymphoma, Neoplasms, Neoplasms, Uterine Cervical Neoplasms, Stomach Neoplasms, Carcinoma, Hepatocellular, Carcinoma, Hepatocellular, Carcinoma, Hepatocellular, Melanoma, Lung Neoplasms, Leukemia, Lymphocytic, Chro…	FALSE	FALSE	1	-1	TDBPP	anticorr
PAX5	TP53	tf-gene	Experimental	Transfac		Adenocarcinoma, Carcinoma, Hepatocellular, Carcinoma, Squamous Cell, Small Cell Lung Carcinoma, Carcinoma, Breast Neoplasms, Ischemia, Li-Fraumeni Syndrome, Sarcoma family syndrome of Li and Fraumeni, Glioma, Neoplasm Metastasis, Melanoma, Stomach Neoplasms, Sarcoma, Lung Neoplasms, Colorectal Neoplasms, Leukemia, Lymphocytic, Chronic, B-Cell, Carcinoma, Non-Small-Cell Lung, Colonic Neoplasms, Ad…	FALSE	FALSE	1	1	TDBPP
PPARA	SEMA6B	tf-gene	Experimental	PMID20584335	Hypertension, Reperfusion Injury, Diabetes Mellitus, Type 2, Obesity, Dyslipidemias, Fatty Liver, Hyperlipidemias, Insulin Resistance, Dermatitis, Atopic, Carcinoma, Neoplasms, Inflammation, Kidney Failure, Chronic, Liver Neoplasms, Encephalomyelitis, Autoimmune, Experimental, Hepatomegaly, Hypoglycemia, Kidney Diseases, Kidney Tubular Necrosis, Acute, Muscular Diseases, Abdominal obesity metabol…		FALSE	FALSE	1	1	TDBPP
RARG	RARG	tf-gene	Experimental	Transfac	Cleft Palate, Musculoskeletal Abnormalities	Cleft Palate, Musculoskeletal Abnormalities	FALSE	FALSE	1	1	TDBPP
RXRA	RARG	tf-gene	Experimental	Transfac	Prostatic Neoplasms, Amyotrophic lateral sclerosis 1, Sciatic Neuropathy	Cleft Palate, Musculoskeletal Abnormalities	FALSE	FALSE	1	1	TDBPP
RXRA	SEMA6B	tf-gene	Experimental	PMID20584335	Prostatic Neoplasms, Amyotrophic lateral sclerosis 1, Sciatic Neuropathy		FALSE	FALSE	1	1	TDBPP
RXRA	CDKN1A	tf-gene	Experimental	Transfac	Prostatic Neoplasms, Amyotrophic lateral sclerosis 1, Sciatic Neuropathy	Colonic Neoplasms, Prostatic Neoplasms, Urinary Bladder Neoplasms, Lung Neoplasms, Papilloma, Stomach Neoplasms, Esophageal Squamous Cell Carcinoma, Carcinoma, Transitional Cell, Intestinal Neoplasms, HIV Infections, Kidney Diseases, Muscular Dystrophy, Facioscapulohumeral, Reperfusion Injury	FALSE	FALSE	1	1	TDBPP
RXRA	IGFBP1	tf-gene	Experimental	PMID20584335	Prostatic Neoplasms, Amyotrophic lateral sclerosis 1, Sciatic Neuropathy	Endometriosis, Abortion, Spontaneous, Colonic Neoplasms, Drug Toxicity, Liver Cirrhosis, Biliary, Liver Cirrhosis, Experimental, Precancerous Conditions	FALSE	FALSE	1	1	TDBPP
TFE3	SERPINE1	tf-gene	Experimental	Transfac	Carcinoma, Renal Cell	Diabetic Nephropathies, Pre-Eclampsia, Thrombosis, Atherosclerosis, Kidney Failure, Chronic, Stomach Neoplasms, Fatty Liver, Prostatic Neoplasms, Liver Neoplasms, Autistic Disorder, Behcet Syndrome, Glomerulosclerosis, Focal Segmental, Nephrotic Syndrome, Cholestasis, Diabetes Mellitus, Experimental, Nervous System Diseases, Plasminogen Activator Inhibitor-1 Deficiency	FALSE	FALSE	1	1	TDBPP
TP53	ADARB1	tf-gene	Experimental	Oreganno	Adenocarcinoma, Carcinoma, Hepatocellular, Carcinoma, Squamous Cell, Small Cell Lung Carcinoma, Carcinoma, Breast Neoplasms, Ischemia, Li-Fraumeni Syndrome, Sarcoma family syndrome of Li and Fraumeni, Glioma, Neoplasm Metastasis, Melanoma, Stomach Neoplasms, Sarcoma, Lung Neoplasms, Colorectal Neoplasms, Leukemia, Lymphocytic, Chronic, B-Cell, Carcinoma, Non-Small-Cell Lung, Colonic Neoplasms, Ad…	Polycystic Ovary Syndrome	FALSE	FALSE	1	1	TDBPP
TP53	hsa-mir-34a	tf-mirna	Experimental	Transmir	Adenocarcinoma, Carcinoma, Hepatocellular, Carcinoma, Squamous Cell, Small Cell Lung Carcinoma, Carcinoma, Breast Neoplasms, Ischemia, Li-Fraumeni Syndrome, Sarcoma family syndrome of Li and Fraumeni, Glioma, Neoplasm Metastasis, Melanoma, Stomach Neoplasms, Sarcoma, Lung Neoplasms, Colorectal Neoplasms, Leukemia, Lymphocytic, Chronic, B-Cell, Carcinoma, Non-Small-Cell Lung, Colonic Neoplasms, Ad…	Breast Neoplasms, Colonic Neoplasms, Lung Neoplasms, Muscular Disorders, Atrophic, Neuroblastoma, Lymphoma, B-Cell, Leukemia, Promyelocytic, Acute, Precursor Cell Lymphoblastic Leukemia-Lymphoma, Neoplasms, Neoplasms, Uterine Cervical Neoplasms, Stomach Neoplasms, Carcinoma, Hepatocellular, Carcinoma, Hepatocellular, Carcinoma, Hepatocellular, Melanoma, Lung Neoplasms, Leukemia, Lymphocytic, Chro…	FALSE	FALSE	1	1	TDBPP
TP53	BAX	tf-gene	Experimental	Transfac	Adenocarcinoma, Carcinoma, Hepatocellular, Carcinoma, Squamous Cell, Small Cell Lung Carcinoma, Carcinoma, Breast Neoplasms, Ischemia, Li-Fraumeni Syndrome, Sarcoma family syndrome of Li and Fraumeni, Glioma, Neoplasm Metastasis, Melanoma, Stomach Neoplasms, Sarcoma, Lung Neoplasms, Colorectal Neoplasms, Leukemia, Lymphocytic, Chronic, B-Cell, Carcinoma, Non-Small-Cell Lung, Colonic Neoplasms, Ad…	Alzheimer Disease, Diabetes Mellitus, Experimental, Breast Neoplasms, Colonic Neoplasms, Prostatic Neoplasms, Esophageal Neoplasms, Acute Kidney Injury, Cerebral Hemorrhage, Drug-Induced Liver Injury, HIV Infections, Intestinal Neoplasms, Ischemia, Lymphoma, T-Cell, Cutaneous, Myocardial Infarction, Myocardial Reperfusion Injury, Nerve Degeneration, Peripheral Nervous System Diseases	FALSE	FALSE	1	1	TDBPP
TP53	ATF3	tf-gene	Experimental	Transfac	Adenocarcinoma, Carcinoma, Hepatocellular, Carcinoma, Squamous Cell, Small Cell Lung Carcinoma, Carcinoma, Breast Neoplasms, Ischemia, Li-Fraumeni Syndrome, Sarcoma family syndrome of Li and Fraumeni, Glioma, Neoplasm Metastasis, Melanoma, Stomach Neoplasms, Sarcoma, Lung Neoplasms, Colorectal Neoplasms, Leukemia, Lymphocytic, Chronic, B-Cell, Carcinoma, Non-Small-Cell Lung, Colonic Neoplasms, Ad…	Hypospadias, Prostatic Neoplasms, Carcinoma, Non-Small-Cell Lung, Diabetes Mellitus, Type 2, Influenza, Human, Liver Neoplasms, Diabetes Mellitus, Experimental, Infarction, Middle Cerebral Artery, Nervous System Diseases, Ovarian Neoplasms, Peripheral Nervous System Diseases	FALSE	FALSE	1	1	TDBPP
TP53	GADD45A	tf-gene	Experimental	Transfac	Adenocarcinoma, Carcinoma, Hepatocellular, Carcinoma, Squamous Cell, Small Cell Lung Carcinoma, Carcinoma, Breast Neoplasms, Ischemia, Li-Fraumeni Syndrome, Sarcoma family syndrome of Li and Fraumeni, Glioma, Neoplasm Metastasis, Melanoma, Stomach Neoplasms, Sarcoma, Lung Neoplasms, Colorectal Neoplasms, Leukemia, Lymphocytic, Chronic, B-Cell, Carcinoma, Non-Small-Cell Lung, Colonic Neoplasms, Ad…	Pancreatic Neoplasms, Ovarian Neoplasms, Prostatic Neoplasms, Chloracne, Drug-Induced Liver Injury, HIV Infections, Stomach Neoplasms	FALSE	FALSE	1	1	TDBPP
TP53	MDM2	tf-gene	Experimental	Transfac	Adenocarcinoma, Carcinoma, Hepatocellular, Carcinoma, Squamous Cell, Small Cell Lung Carcinoma, Carcinoma, Breast Neoplasms, Ischemia, Li-Fraumeni Syndrome, Sarcoma family syndrome of Li and Fraumeni, Glioma, Neoplasm Metastasis, Melanoma, Stomach Neoplasms, Sarcoma, Lung Neoplasms, Colorectal Neoplasms, Leukemia, Lymphocytic, Chronic, B-Cell, Carcinoma, Non-Small-Cell Lung, Colonic Neoplasms, Ad…	Carcinoma, Non-Small-Cell Lung, Melanoma, Prostatic Neoplasms, Precancerous Conditions, Cell Transformation, Neoplastic, HIV Infections, Peripheral Nervous System Diseases	FALSE	FALSE	1	1	TDBPP
TP53	NDRG1	tf-gene	Experimental	Transfac	Adenocarcinoma, Carcinoma, Hepatocellular, Carcinoma, Squamous Cell, Small Cell Lung Carcinoma, Carcinoma, Breast Neoplasms, Ischemia, Li-Fraumeni Syndrome, Sarcoma family syndrome of Li and Fraumeni, Glioma, Neoplasm Metastasis, Melanoma, Stomach Neoplasms, Sarcoma, Lung Neoplasms, Colorectal Neoplasms, Leukemia, Lymphocytic, Chronic, B-Cell, Carcinoma, Non-Small-Cell Lung, Colonic Neoplasms, Ad…	Neuropathy, hereditary motor and sensory, LOM type, Neoplasm Metastasis, Breast Neoplasms, Prostatic Neoplasms, Kidney Neoplasms, Melanoma, Carcinoma, Non-Small-Cell Lung, Carcinoma, Renal Cell, Glioblastoma, Astrocytoma, Carcinoma, Pancreatic Ductal, Hemangioblastoma, Liver Neoplasms, Small Cell Lung Carcinoma, Smooth Muscle Tumor	FALSE	FALSE	-1	1	TDBPP	anticorr
TP53	CDKN1A	tf-gene	Experimental	Transfac	Adenocarcinoma, Carcinoma, Hepatocellular, Carcinoma, Squamous Cell, Small Cell Lung Carcinoma, Carcinoma, Breast Neoplasms, Ischemia, Li-Fraumeni Syndrome, Sarcoma family syndrome of Li and Fraumeni, Glioma, Neoplasm Metastasis, Melanoma, Stomach Neoplasms, Sarcoma, Lung Neoplasms, Colorectal Neoplasms, Leukemia, Lymphocytic, Chronic, B-Cell, Carcinoma, Non-Small-Cell Lung, Colonic Neoplasms, Ad…	Colonic Neoplasms, Prostatic Neoplasms, Urinary Bladder Neoplasms, Lung Neoplasms, Papilloma, Stomach Neoplasms, Esophageal Squamous Cell Carcinoma, Carcinoma, Transitional Cell, Intestinal Neoplasms, HIV Infections, Kidney Diseases, Muscular Dystrophy, Facioscapulohumeral, Reperfusion Injury	FALSE	FALSE	1	1	TDBPP
TP53	CASP1	tf-gene	Experimental	Transfac	Adenocarcinoma, Carcinoma, Hepatocellular, Carcinoma, Squamous Cell, Small Cell Lung Carcinoma, Carcinoma, Breast Neoplasms, Ischemia, Li-Fraumeni Syndrome, Sarcoma family syndrome of Li and Fraumeni, Glioma, Neoplasm Metastasis, Melanoma, Stomach Neoplasms, Sarcoma, Lung Neoplasms, Colorectal Neoplasms, Leukemia, Lymphocytic, Chronic, B-Cell, Carcinoma, Non-Small-Cell Lung, Colonic Neoplasms, Ad…	Amyotrophic lateral sclerosis 1, Pneumonia, Hypersensitivity, Myocardial Reperfusion Injury, Status Epilepticus	FALSE	FALSE	-1	1	TDBPP	anticorr
TP53	TP53	tf-gene	Experimental	Transfac	Adenocarcinoma, Carcinoma, Hepatocellular, Carcinoma, Squamous Cell, Small Cell Lung Carcinoma, Carcinoma, Breast Neoplasms, Ischemia, Li-Fraumeni Syndrome, Sarcoma family syndrome of Li and Fraumeni, Glioma, Neoplasm Metastasis, Melanoma, Stomach Neoplasms, Sarcoma, Lung Neoplasms, Colorectal Neoplasms, Leukemia, Lymphocytic, Chronic, B-Cell, Carcinoma, Non-Small-Cell Lung, Colonic Neoplasms, Ad…	Adenocarcinoma, Carcinoma, Hepatocellular, Carcinoma, Squamous Cell, Small Cell Lung Carcinoma, Carcinoma, Breast Neoplasms, Ischemia, Li-Fraumeni Syndrome, Sarcoma family syndrome of Li and Fraumeni, Glioma, Neoplasm Metastasis, Melanoma, Stomach Neoplasms, Sarcoma, Lung Neoplasms, Colorectal Neoplasms, Leukemia, Lymphocytic, Chronic, B-Cell, Carcinoma, Non-Small-Cell Lung, Colonic Neoplasms, Ad…	FALSE	FALSE	1	1	TDBPP
VDR	IGFBP1	tf-gene	Experimental	PMID20584335	Vitamin D-Dependent Rickets, Type 2A, Osteoporosis, Rickets, Prostatic Neoplasms, Hypertension, Vitamin D Deficiency, Neoplasms, Alopecia, Uremia, Carcinoma, Transitional Cell, Epilepsy, Temporal Lobe, Genetic Diseases, Inborn, Leukemia, Lymphocytic, Chronic, B-Cell	Endometriosis, Abortion, Spontaneous, Colonic Neoplasms, Drug Toxicity, Liver Cirrhosis, Biliary, Liver Cirrhosis, Experimental, Precancerous Conditions	FALSE	FALSE	1	1	TDBPP
VDR	CDKN1A	tf-gene	Experimental	Transfac	Vitamin D-Dependent Rickets, Type 2A, Osteoporosis, Rickets, Prostatic Neoplasms, Hypertension, Vitamin D Deficiency, Neoplasms, Alopecia, Uremia, Carcinoma, Transitional Cell, Epilepsy, Temporal Lobe, Genetic Diseases, Inborn, Leukemia, Lymphocytic, Chronic, B-Cell	Colonic Neoplasms, Prostatic Neoplasms, Urinary Bladder Neoplasms, Lung Neoplasms, Papilloma, Stomach Neoplasms, Esophageal Squamous Cell Carcinoma, Carcinoma, Transitional Cell, Intestinal Neoplasms, HIV Infections, Kidney Diseases, Muscular Dystrophy, Facioscapulohumeral, Reperfusion Injury	FALSE	FALSE	1	1	TDBPP
ZEB1	hsa-mir-34a	tf-mirna	Experimental	Transmir	Corneal Dystrophy, Fuchs Endothelial, 6, Corneal Dystrophy, Posterior Polymorphous, 3, Breast Neoplasms, Cell Transformation, Neoplastic, Disease Progression, Myocardial Ischemia, Neoplasm Invasiveness	Breast Neoplasms, Colonic Neoplasms, Lung Neoplasms, Muscular Disorders, Atrophic, Neuroblastoma, Lymphoma, B-Cell, Leukemia, Promyelocytic, Acute, Precursor Cell Lymphoblastic Leukemia-Lymphoma, Neoplasms, Neoplasms, Uterine Cervical Neoplasms, Stomach Neoplasms, Carcinoma, Hepatocellular, Carcinoma, Hepatocellular, Carcinoma, Hepatocellular, Melanoma, Lung Neoplasms, Leukemia, Lymphocytic, Chro…	FALSE	FALSE	1	1	TDBPP
hsa-let-7a	CASP8	mirna-gene	Experimental	mirtarbase.adstudy	Carcinoma, Non-Small-Cell Lung, Stomach Neoplasms, Stomach Neoplasms	CASPASE 8 DEFICIENCY, Status Epilepticus, Breast Neoplasms, Lung Neoplasms, Carcinoma, Hepatocellular, Melanoma, Carcinoma, Non-Small-Cell Lung, Carcinoma, squamous cell of head and neck, Autoimmune Lymphoproliferative Syndrome, Adenocarcinoma, Colorectal Neoplasms, Esophageal Neoplasms, Cerebral Hemorrhage, Dermatitis, Allergic Contact, Diabetes Mellitus, Type 2, Edema, Myocardial Reperfusion In…	FALSE	FALSE	1	-1	TDBPP	anticorr
hsa-let-7b	SNAP23	mirna-gene	Experimental	mirtarbase.adstudy	Colonic Neoplasms, Heart Failure, Lung Neoplasms, Lung Neoplasms, Lung Neoplasms, Lung Neoplasms, Lung Neoplasms, Lung Neoplasms, Lung Neoplasms, Neoplasms, Neoplasms, Neoplasms, Ovarian Neoplasms, Neoplasms, Digestive System Neoplasms, Head and Neck Neoplasms, Neoplasms, Sarcoma, Kaposi, Lung Neoplasms, Melanoma, Pancreatic Neoplasms, Pituitary Neoplasms, Lymphoma, Primary Effusion, Adrenocortic…	Myocardial Ischemia	FALSE	FALSE	1	-1	TDBPP	anticorr
hsa-let-7b	DOCK5	mirna-gene	Experimental	mirtarbase.adstudy	Colonic Neoplasms, Heart Failure, Lung Neoplasms, Lung Neoplasms, Lung Neoplasms, Lung Neoplasms, Lung Neoplasms, Lung Neoplasms, Lung Neoplasms, Neoplasms, Neoplasms, Neoplasms, Ovarian Neoplasms, Neoplasms, Digestive System Neoplasms, Head and Neck Neoplasms, Neoplasms, Sarcoma, Kaposi, Lung Neoplasms, Melanoma, Pancreatic Neoplasms, Pituitary Neoplasms, Lymphoma, Primary Effusion, Adrenocortic…		FALSE	FALSE	1	-1	TDBPP	anticorr
hsa-let-7b	MAP7D1	mirna-gene	Experimental	mirtarbase.adstudy	Colonic Neoplasms, Heart Failure, Lung Neoplasms, Lung Neoplasms, Lung Neoplasms, Lung Neoplasms, Lung Neoplasms, Lung Neoplasms, Lung Neoplasms, Neoplasms, Neoplasms, Neoplasms, Ovarian Neoplasms, Neoplasms, Digestive System Neoplasms, Head and Neck Neoplasms, Neoplasms, Sarcoma, Kaposi, Lung Neoplasms, Melanoma, Pancreatic Neoplasms, Pituitary Neoplasms, Lymphoma, Primary Effusion, Adrenocortic…		FALSE	FALSE	-1	-1	TDBPP
hsa-let-7c-5p	TGFBR1	mirna-gene	Experimental	mirtarbase		LOEYS-DIETZ SYNDROME, TYPE 1A, Loeys-Dietz Syndrome, Type 2A, Keratoacanthoma familial, Colorectal Neoplasms, Loeys-Dietz Syndrome, Skin Neoplasms, Aneurysm, Dissecting, Abortion, Spontaneous, Auditory Neuropathy, Autosomal Dominant, 1, Uremia	FALSE	FALSE	1	-1	TDBPP	anticorr
hsa-mir-122	CCNG1	mirna-gene	Experimental	mirtarbase.adstudy	Carcinoma, Hepatocellular, Hepatitis, Hepatitis C, Lipid Metabolism Disorders, Hepatitis C, Hepatitis C, Hepatitis C, Carcinoma, Hepatocellular, Carcinoma, Hepatocellular, Carcinoma, Hepatocellular, Carcinoma, Hepatocellular, Carcinoma, Hepatocellular, Carcinoma, Hepatocellular, Stroke, Hepatitis C, Liver Neoplasms, Hepatitis C, Chronic, Stroke, Carcinoma, Hepatocellular, Multiple Sclerosis, Neop…	Lung Neoplasms	FALSE	FALSE	1	-1	TDBPP	anticorr
hsa-mir-122	SLC7A1	mirna-gene	Experimental	mirtarbase.adstudy	Carcinoma, Hepatocellular, Hepatitis, Hepatitis C, Lipid Metabolism Disorders, Hepatitis C, Hepatitis C, Hepatitis C, Carcinoma, Hepatocellular, Carcinoma, Hepatocellular, Carcinoma, Hepatocellular, Carcinoma, Hepatocellular, Carcinoma, Hepatocellular, Carcinoma, Hepatocellular, Stroke, Hepatitis C, Liver Neoplasms, Hepatitis C, Chronic, Stroke, Carcinoma, Hepatocellular, Multiple Sclerosis, Neop…	Prostatic Neoplasms	FALSE	FALSE	1	-1	TDBPP	anticorr
hsa-mir-125a	ERBB2	mirna-gene	Experimental	tarbase.adstudy	Breast Neoplasms, Breast Neoplasms, Carcinoma, Hepatocellular, Carcinoma, Hepatocellular, Heart Failure, Lung Neoplasms, Muscular Disorders, Atrophic, Ovarian Neoplasms, Endometriosis, Leukemia, Medulloblastoma, Retinal Degeneration, Ovarian Neoplasms, Breast Neoplasms, Hepatoblastoma, Atrophy, Myelodysplastic Syndromes, Carcinoma, Non-Small-Cell Lung, Carcinoma, Non-Small-Cell Lung, Carcinoma, S…	Breast Neoplasms, Mammary Neoplasms, Experimental, Neoplasm Metastasis, Adenocarcinoma, Ovarian Neoplasms, Prostatic Neoplasms, Lung Neoplasms, Stomach Neoplasms, Cholangiocarcinoma, Glioma, Medulloblastoma, Colonic Neoplasms, Esophageal Neoplasms, Carcinoma, Renal Cell, Lymphatic Metastasis, Papilloma, Disease Progression, Gastrointestinal Neoplasms, Mammary Neoplasms, Animal, Neoplasm Recurrenc…	FALSE	FALSE	1	-1	TDBPP	anticorr
hsa-mir-125b-5p	ERBB2	mirna-gene	Experimental	mirtarbase		Breast Neoplasms, Mammary Neoplasms, Experimental, Neoplasm Metastasis, Adenocarcinoma, Ovarian Neoplasms, Prostatic Neoplasms, Lung Neoplasms, Stomach Neoplasms, Cholangiocarcinoma, Glioma, Medulloblastoma, Colonic Neoplasms, Esophageal Neoplasms, Carcinoma, Renal Cell, Lymphatic Metastasis, Papilloma, Disease Progression, Gastrointestinal Neoplasms, Mammary Neoplasms, Animal, Neoplasm Recurrenc…	FALSE	FALSE	1	-1	TDBPP	anticorr
hsa-mir-125b-5p	TP53	mirna-gene	Experimental	mirtarbase		Adenocarcinoma, Carcinoma, Hepatocellular, Carcinoma, Squamous Cell, Small Cell Lung Carcinoma, Carcinoma, Breast Neoplasms, Ischemia, Li-Fraumeni Syndrome, Sarcoma family syndrome of Li and Fraumeni, Glioma, Neoplasm Metastasis, Melanoma, Stomach Neoplasms, Sarcoma, Lung Neoplasms, Colorectal Neoplasms, Leukemia, Lymphocytic, Chronic, B-Cell, Carcinoma, Non-Small-Cell Lung, Colonic Neoplasms, Ad…	FALSE	FALSE	1	-1	TDBPP	anticorr
hsa-mir-125b-5p	CYP24A1	mirna-gene	Experimental	mirtarbase		Lung Neoplasms, Hypercalcemia, Idiopathic, of Infancy, Abortion, Spontaneous, Peripheral Nervous System Diseases, Renal Insufficiency	FALSE	FALSE	1	-1	TDBPP	anticorr
hsa-mir-125b-5p	MMP13	mirna-gene	Experimental	mirtarbase		Spondyloepimetaphyseal Dysplasia, Missouri Type, Liver Cirrhosis, Experimental, Craniofacial Abnormalities, Prostatic Neoplasms	FALSE	FALSE	1	-1	TDBPP	anticorr
hsa-mir-125b-5p	VDR	mirna-gene	Experimental	mirtarbase		Vitamin D-Dependent Rickets, Type 2A, Osteoporosis, Rickets, Prostatic Neoplasms, Hypertension, Vitamin D Deficiency, Neoplasms, Alopecia, Uremia, Carcinoma, Transitional Cell, Epilepsy, Temporal Lobe, Genetic Diseases, Inborn, Leukemia, Lymphocytic, Chronic, B-Cell	FALSE	FALSE	1	-1	TDBPP	anticorr
hsa-mir-125b-5p	BCL3	mirna-gene	Experimental	mirtarbase			FALSE	FALSE	1	-1	TDBPP	anticorr
hsa-mir-125b-5p	TNFAIP3	mirna-gene	Experimental	mirtarbase		Lupus Erythematosus, Systemic, Arthritis, Rheumatoid, Psoriasis	FALSE	FALSE	1	-1	TDBPP	anticorr
hsa-mir-128-3p	TGFBR1	mirna-gene	Experimental	mirtarbase		LOEYS-DIETZ SYNDROME, TYPE 1A, Loeys-Dietz Syndrome, Type 2A, Keratoacanthoma familial, Colorectal Neoplasms, Loeys-Dietz Syndrome, Skin Neoplasms, Aneurysm, Dissecting, Abortion, Spontaneous, Auditory Neuropathy, Autosomal Dominant, 1, Uremia	FALSE	FALSE	1	-1	TDBPP	anticorr
hsa-mir-129-5p	SOX4	mirna-gene	Experimental	mirtarbase.adstudy		Carcinoma, Adenoid Cystic, Liver Neoplasms, Experimental, Salivary Gland Neoplasms	FALSE	FALSE	-1	-1	TDBPP
hsa-mir-129-5p	BMPR2	mirna-gene	Experimental	mirtarbase.adstudy		Pulmonary arterial hypertension, Hypertension, Pulmonary, Pulmonary Veno-Occlusive Disease, Hyperandrogenism	FALSE	FALSE	1	-1	TDBPP	anticorr
hsa-mir-130a	ATXN1	mirna-gene	Experimental	mirtarbase.adstudy	Heart Failure, Muscular Disorders, Atrophic, Thyroid Neoplasms, Ovarian Neoplasms, Adrenocortical Carcinoma, Adrenocortical Adenoma, Coronary Artery Disease, Head and Neck Neoplasms, Carcinoma, Squamous Cell, Leukemia, Myeloid, Carcinoma, Non-Small-Cell Lung, Carcinoma, Hepatocellular, Stomach Neoplasms, Periodontitis, Leukemia, Lymphocytic, Chronic, B-Cell, Prostatic Neoplasms, Ovarian Neoplasms…	Spinocerebellar Ataxias	FALSE	FALSE	1	-1	TDBPP	anticorr
hsa-mir-135a	NR3C2	mirna-gene	Experimental	mirtarbase.adstudy		Hypertension, Early-Onset, Autosomal Dominant, with Severe Exacerbation in Pregnancy, PSEUDOHYPOALDOSTERONISM, TYPE I, AUTOSOMAL DOMINANT, Pseudohypoaldosteronism, Cardiomyopathy, Dilated, Heart Failure, Myocardial Infarction, Endometriosis, Ventricular Dysfunction, Left	FALSE	FALSE	1	-1	TDBPP	anticorr
hsa-mir-141-3p	ZFPM2	mirna-gene	Experimental	mirtarbase		Tetralogy of Fallot, Hernia, Diaphragmatic, Diaphragmatic Hernia 3	FALSE	FALSE	-1	-1	TDBPP
hsa-mir-141-3p	PPARA	mirna-gene	Experimental	mirtarbase		Hypertension, Reperfusion Injury, Diabetes Mellitus, Type 2, Obesity, Dyslipidemias, Fatty Liver, Hyperlipidemias, Insulin Resistance, Dermatitis, Atopic, Carcinoma, Neoplasms, Inflammation, Kidney Failure, Chronic, Liver Neoplasms, Encephalomyelitis, Autoimmune, Experimental, Hepatomegaly, Hypoglycemia, Kidney Diseases, Kidney Tubular Necrosis, Acute, Muscular Diseases, Abdominal obesity metabol…	FALSE	FALSE	1	-1	TDBPP	anticorr
hsa-mir-141-3p	ZEB1	mirna-gene	Experimental	mirtarbase		Corneal Dystrophy, Fuchs Endothelial, 6, Corneal Dystrophy, Posterior Polymorphous, 3, Breast Neoplasms, Cell Transformation, Neoplastic, Disease Progression, Myocardial Ischemia, Neoplasm Invasiveness	FALSE	FALSE	1	-1	TDBPP	anticorr
hsa-mir-145-5p	CDKN1A	mirna-gene	Experimental	mirtarbase		Colonic Neoplasms, Prostatic Neoplasms, Urinary Bladder Neoplasms, Lung Neoplasms, Papilloma, Stomach Neoplasms, Esophageal Squamous Cell Carcinoma, Carcinoma, Transitional Cell, Intestinal Neoplasms, HIV Infections, Kidney Diseases, Muscular Dystrophy, Facioscapulohumeral, Reperfusion Injury	FALSE	FALSE	1	-1	TDBPP	anticorr
hsa-mir-145-5p	MYO5A	mirna-gene	Experimental	mirtarbase		Griscelli syndrome type 1, Peripheral Nervous System Diseases	FALSE	FALSE	1	-1	TDBPP	anticorr
hsa-mir-145-5p	SERPINE1	mirna-gene	Experimental	mirtarbase		Diabetic Nephropathies, Pre-Eclampsia, Thrombosis, Atherosclerosis, Kidney Failure, Chronic, Stomach Neoplasms, Fatty Liver, Prostatic Neoplasms, Liver Neoplasms, Autistic Disorder, Behcet Syndrome, Glomerulosclerosis, Focal Segmental, Nephrotic Syndrome, Cholestasis, Diabetes Mellitus, Experimental, Nervous System Diseases, Plasminogen Activator Inhibitor-1 Deficiency	FALSE	FALSE	1	-1	TDBPP	anticorr
hsa-mir-145-5p	KREMEN1	mirna-gene	Experimental	mirtarbase			FALSE	FALSE	1	-1	TDBPP	anticorr
hsa-mir-145-5p	MDM2	mirna-gene	Experimental	mirtarbase		Carcinoma, Non-Small-Cell Lung, Melanoma, Prostatic Neoplasms, Precancerous Conditions, Cell Transformation, Neoplastic, HIV Infections, Peripheral Nervous System Diseases	FALSE	FALSE	1	-1	TDBPP	anticorr
hsa-mir-146a	CDKN1A	mirna-gene	Experimental	mirtarbase.adstudy	Breast Neoplasms, Leukemia, Lymphocytic, Chronic, B-Cell, Lung Neoplasms, Muscular Disorders, Atrophic, Pancreatic Neoplasms, Prostatic Neoplasms, Psoriasis, Psoriasis, Thyroid Neoplasms, Thyroid Neoplasms, Thyroid Neoplasms, Thyroid Neoplasms, Thyroid Neoplasms, Lymphoma, B-Cell, Burkitt Lymphoma, Eczema, Alzheimer Disease, Autistic Disorder, Breast Neoplasms, Breast Neoplasms, Breast Neoplasms,…	Colonic Neoplasms, Prostatic Neoplasms, Urinary Bladder Neoplasms, Lung Neoplasms, Papilloma, Stomach Neoplasms, Esophageal Squamous Cell Carcinoma, Carcinoma, Transitional Cell, Intestinal Neoplasms, HIV Infections, Kidney Diseases, Muscular Dystrophy, Facioscapulohumeral, Reperfusion Injury	FALSE	FALSE	1	1	TDBPP
hsa-mir-181a-5p	FOS	mirna-gene	Experimental	mirtarbase		Hypertension, Reperfusion Injury, Carcinoma, Hepatocellular, Breast Neoplasms, Endometriosis, Seizures, Amphetamine-Related Disorders, Amyotrophic lateral sclerosis 1, Anxiety Disorders, Brain Injuries, Cocaine-Related Disorders, Epilepsy, Fibrous Dysplasia of Bone, Hemorrhage, Hyperkinesis, Infarction, Middle Cerebral Artery, Lung Neoplasms, Nervous System Diseases, Neurotoxicity Syndromes, Stat…	FALSE	FALSE	1	-1	TDBPP	anticorr
hsa-mir-181b-5p	MAP3K10	mirna-gene	Experimental	mirtarbase			FALSE	FALSE	1	-1	TDBPP	anticorr
hsa-mir-181b-5p	CBX7	mirna-gene	Experimental	mirtarbase			FALSE	FALSE	1	-1	TDBPP	anticorr
hsa-mir-181c-5p	BMPR2	mirna-gene	Experimental	mirtarbase		Pulmonary arterial hypertension, Hypertension, Pulmonary, Pulmonary Veno-Occlusive Disease, Hyperandrogenism	FALSE	FALSE	1	-1	TDBPP	anticorr
hsa-mir-182-5p	CDKN1A	mirna-gene	Experimental	mirtarbase		Colonic Neoplasms, Prostatic Neoplasms, Urinary Bladder Neoplasms, Lung Neoplasms, Papilloma, Stomach Neoplasms, Esophageal Squamous Cell Carcinoma, Carcinoma, Transitional Cell, Intestinal Neoplasms, HIV Infections, Kidney Diseases, Muscular Dystrophy, Facioscapulohumeral, Reperfusion Injury	FALSE	FALSE	1	-1	TDBPP	anticorr
hsa-mir-182-5p	RARG	mirna-gene	Experimental	mirtarbase		Cleft Palate, Musculoskeletal Abnormalities	FALSE	FALSE	1	-1	TDBPP	anticorr
hsa-mir-200a-3p	WASF3	mirna-gene	Experimental	mirtarbase			FALSE	FALSE	-1	-1	TDBPP
hsa-mir-200a-3p	ZFPM2	mirna-gene	Experimental	mirtarbase		Tetralogy of Fallot, Hernia, Diaphragmatic, Diaphragmatic Hernia 3	FALSE	FALSE	-1	-1	TDBPP
hsa-mir-200a-3p	ZEB1	mirna-gene	Experimental	mirtarbase		Corneal Dystrophy, Fuchs Endothelial, 6, Corneal Dystrophy, Posterior Polymorphous, 3, Breast Neoplasms, Cell Transformation, Neoplastic, Disease Progression, Myocardial Ischemia, Neoplasm Invasiveness	FALSE	FALSE	1	-1	TDBPP	anticorr
hsa-mir-204-5p	SOX4	mirna-gene	Experimental	mirtarbase		Carcinoma, Adenoid Cystic, Liver Neoplasms, Experimental, Salivary Gland Neoplasms	FALSE	FALSE	-1	-1	TDBPP
hsa-mir-204-5p	CREB5	mirna-gene	Experimental	mirtarbase			FALSE	FALSE	1	-1	TDBPP	anticorr
hsa-mir-204-5p	TGFBR1	mirna-gene	Experimental	mirtarbase		LOEYS-DIETZ SYNDROME, TYPE 1A, Loeys-Dietz Syndrome, Type 2A, Keratoacanthoma familial, Colorectal Neoplasms, Loeys-Dietz Syndrome, Skin Neoplasms, Aneurysm, Dissecting, Abortion, Spontaneous, Auditory Neuropathy, Autosomal Dominant, 1, Uremia	FALSE	FALSE	1	-1	TDBPP	anticorr
hsa-mir-21	TNFAIP3	mirna-gene	Experimental	mirtarbase.adstudy	Brain Neoplasms, Brain Neoplasms, Breast Neoplasms, Breast Neoplasms, Breast Neoplasms, Breast Neoplasms, Breast Neoplasms, Cholangiocarcinoma, Colonic Neoplasms, Dermatitis, Atopic, Focal Epithelial Hyperplasia, Glioblastoma, Glioblastoma, Glioblastoma, Glioblastoma, Glioblastoma, Glioblastoma, Heart Diseases, Heart Failure, Lung Neoplasms, Lung Neoplasms, Lymphoma, Large B-Cell, Diffuse, Muscul…	Lupus Erythematosus, Systemic, Arthritis, Rheumatoid, Psoriasis	FALSE	FALSE	1	1	TDBPP
hsa-mir-21	BMPR2	mirna-gene	Experimental	mirtarbase.adstudy	Brain Neoplasms, Brain Neoplasms, Breast Neoplasms, Breast Neoplasms, Breast Neoplasms, Breast Neoplasms, Breast Neoplasms, Cholangiocarcinoma, Colonic Neoplasms, Dermatitis, Atopic, Focal Epithelial Hyperplasia, Glioblastoma, Glioblastoma, Glioblastoma, Glioblastoma, Glioblastoma, Glioblastoma, Heart Diseases, Heart Failure, Lung Neoplasms, Lung Neoplasms, Lymphoma, Large B-Cell, Diffuse, Muscul…	Pulmonary arterial hypertension, Hypertension, Pulmonary, Pulmonary Veno-Occlusive Disease, Hyperandrogenism	FALSE	FALSE	1	1	TDBPP
hsa-mir-21	ERBB2	mirna-gene	Experimental	mirtarbase.adstudy	Brain Neoplasms, Brain Neoplasms, Breast Neoplasms, Breast Neoplasms, Breast Neoplasms, Breast Neoplasms, Breast Neoplasms, Cholangiocarcinoma, Colonic Neoplasms, Dermatitis, Atopic, Focal Epithelial Hyperplasia, Glioblastoma, Glioblastoma, Glioblastoma, Glioblastoma, Glioblastoma, Glioblastoma, Heart Diseases, Heart Failure, Lung Neoplasms, Lung Neoplasms, Lymphoma, Large B-Cell, Diffuse, Muscul…	Breast Neoplasms, Mammary Neoplasms, Experimental, Neoplasm Metastasis, Adenocarcinoma, Ovarian Neoplasms, Prostatic Neoplasms, Lung Neoplasms, Stomach Neoplasms, Cholangiocarcinoma, Glioma, Medulloblastoma, Colonic Neoplasms, Esophageal Neoplasms, Carcinoma, Renal Cell, Lymphatic Metastasis, Papilloma, Disease Progression, Gastrointestinal Neoplasms, Mammary Neoplasms, Animal, Neoplasm Recurrenc…	FALSE	FALSE	1	1	TDBPP
hsa-mir-21	ISCU	mirna-gene	Experimental	mirtarbase.adstudy	Brain Neoplasms, Brain Neoplasms, Breast Neoplasms, Breast Neoplasms, Breast Neoplasms, Breast Neoplasms, Breast Neoplasms, Cholangiocarcinoma, Colonic Neoplasms, Dermatitis, Atopic, Focal Epithelial Hyperplasia, Glioblastoma, Glioblastoma, Glioblastoma, Glioblastoma, Glioblastoma, Glioblastoma, Heart Diseases, Heart Failure, Lung Neoplasms, Lung Neoplasms, Lymphoma, Large B-Cell, Diffuse, Muscul…	Myopathy with Lactic Acidosis, Hereditary	FALSE	FALSE	1	1	TDBPP
hsa-mir-21	HIPK3	mirna-gene	Experimental	mirrecords.adstudy	Brain Neoplasms, Brain Neoplasms, Breast Neoplasms, Breast Neoplasms, Breast Neoplasms, Breast Neoplasms, Breast Neoplasms, Cholangiocarcinoma, Colonic Neoplasms, Dermatitis, Atopic, Focal Epithelial Hyperplasia, Glioblastoma, Glioblastoma, Glioblastoma, Glioblastoma, Glioblastoma, Glioblastoma, Heart Diseases, Heart Failure, Lung Neoplasms, Lung Neoplasms, Lymphoma, Large B-Cell, Diffuse, Muscul…		FALSE	FALSE	1	1	TDBPP
hsa-mir-21	PPARA	mirna-gene	Experimental	mirRecord	Brain Neoplasms, Brain Neoplasms, Breast Neoplasms, Breast Neoplasms, Breast Neoplasms, Breast Neoplasms, Breast Neoplasms, Cholangiocarcinoma, Colonic Neoplasms, Dermatitis, Atopic, Focal Epithelial Hyperplasia, Glioblastoma, Glioblastoma, Glioblastoma, Glioblastoma, Glioblastoma, Glioblastoma, Heart Diseases, Heart Failure, Lung Neoplasms, Lung Neoplasms, Lymphoma, Large B-Cell, Diffuse, Muscul…	Hypertension, Reperfusion Injury, Diabetes Mellitus, Type 2, Obesity, Dyslipidemias, Fatty Liver, Hyperlipidemias, Insulin Resistance, Dermatitis, Atopic, Carcinoma, Neoplasms, Inflammation, Kidney Failure, Chronic, Liver Neoplasms, Encephalomyelitis, Autoimmune, Experimental, Hepatomegaly, Hypoglycemia, Kidney Diseases, Kidney Tubular Necrosis, Acute, Muscular Diseases, Abdominal obesity metabol…	FALSE	FALSE	1	1	TDBPP
hsa-mir-21	CDKN1A	mirna-gene	Experimental	mirrecords.adstudy	Brain Neoplasms, Brain Neoplasms, Breast Neoplasms, Breast Neoplasms, Breast Neoplasms, Breast Neoplasms, Breast Neoplasms, Cholangiocarcinoma, Colonic Neoplasms, Dermatitis, Atopic, Focal Epithelial Hyperplasia, Glioblastoma, Glioblastoma, Glioblastoma, Glioblastoma, Glioblastoma, Glioblastoma, Heart Diseases, Heart Failure, Lung Neoplasms, Lung Neoplasms, Lymphoma, Large B-Cell, Diffuse, Muscul…	Colonic Neoplasms, Prostatic Neoplasms, Urinary Bladder Neoplasms, Lung Neoplasms, Papilloma, Stomach Neoplasms, Esophageal Squamous Cell Carcinoma, Carcinoma, Transitional Cell, Intestinal Neoplasms, HIV Infections, Kidney Diseases, Muscular Dystrophy, Facioscapulohumeral, Reperfusion Injury	FALSE	FALSE	1	1	TDBPP
hsa-mir-21	TGFBR3	mirna-gene	Experimental	mirtarbase.adstudy	Brain Neoplasms, Brain Neoplasms, Breast Neoplasms, Breast Neoplasms, Breast Neoplasms, Breast Neoplasms, Breast Neoplasms, Cholangiocarcinoma, Colonic Neoplasms, Dermatitis, Atopic, Focal Epithelial Hyperplasia, Glioblastoma, Glioblastoma, Glioblastoma, Glioblastoma, Glioblastoma, Glioblastoma, Heart Diseases, Heart Failure, Lung Neoplasms, Lung Neoplasms, Lymphoma, Large B-Cell, Diffuse, Muscul…		FALSE	FALSE	1	1	TDBPP
hsa-mir-216a	CD44	mirna-gene	Experimental	mirtarbase.adstudy	Lung Neoplasms, Melanoma, Fatty Liver, Pancreatic Neoplasms, Carcinoma, Hepatocellular, Heart Failure, Pancreatic Neoplasms, Pancreatic Neoplasms, Carcinoma, Hepatocellular	Stomach Neoplasms, Leukemia, Promyelocytic, Acute, Pancreatic Neoplasms, Skin Diseases, Acute Kidney Injury, Arsenic Poisoning, Mammary Neoplasms, Experimental, Nerve Degeneration, Peripheral Nervous System Diseases, Vitiligo	FALSE	FALSE	1	-1	TDBPP	anticorr
hsa-mir-221-3p	FOS	mirna-gene	Experimental	mirtarbase		Hypertension, Reperfusion Injury, Carcinoma, Hepatocellular, Breast Neoplasms, Endometriosis, Seizures, Amphetamine-Related Disorders, Amyotrophic lateral sclerosis 1, Anxiety Disorders, Brain Injuries, Cocaine-Related Disorders, Epilepsy, Fibrous Dysplasia of Bone, Hemorrhage, Hyperkinesis, Infarction, Middle Cerebral Artery, Lung Neoplasms, Nervous System Diseases, Neurotoxicity Syndromes, Stat…	FALSE	FALSE	1	-1	TDBPP	anticorr
hsa-mir-221-3p	TP53	mirna-gene	Experimental	mirtarbase		Adenocarcinoma, Carcinoma, Hepatocellular, Carcinoma, Squamous Cell, Small Cell Lung Carcinoma, Carcinoma, Breast Neoplasms, Ischemia, Li-Fraumeni Syndrome, Sarcoma family syndrome of Li and Fraumeni, Glioma, Neoplasm Metastasis, Melanoma, Stomach Neoplasms, Sarcoma, Lung Neoplasms, Colorectal Neoplasms, Leukemia, Lymphocytic, Chronic, B-Cell, Carcinoma, Non-Small-Cell Lung, Colonic Neoplasms, Ad…	FALSE	FALSE	1	-1	TDBPP	anticorr
hsa-mir-27b-3p	VDR	mirna-gene	Experimental	mirtarbase		Vitamin D-Dependent Rickets, Type 2A, Osteoporosis, Rickets, Prostatic Neoplasms, Hypertension, Vitamin D Deficiency, Neoplasms, Alopecia, Uremia, Carcinoma, Transitional Cell, Epilepsy, Temporal Lobe, Genetic Diseases, Inborn, Leukemia, Lymphocytic, Chronic, B-Cell	FALSE	FALSE	1	-1	TDBPP	anticorr
hsa-mir-27b-3p	ADORA2B	mirna-gene	Experimental	mirtarbase			FALSE	FALSE	1	-1	TDBPP	anticorr
hsa-mir-27b-3p	MMP13	mirna-gene	Experimental	mirtarbase		Spondyloepimetaphyseal Dysplasia, Missouri Type, Liver Cirrhosis, Experimental, Craniofacial Abnormalities, Prostatic Neoplasms	FALSE	FALSE	1	-1	TDBPP	anticorr
hsa-mir-29a	DNMT3A	mirna-gene	Experimental	mirtarbase.adstudy	Acquired Immunodeficiency Syndrome, Heart Failure, Leukemia, Lymphocytic, Chronic, B-Cell, Lung Neoplasms, Lung Neoplasms, Neoplasms, Schizophrenia, Lymphoma, B-Cell, Alzheimer Disease, Precursor Cell Lymphoblastic Leukemia-Lymphoma, Acquired Immunodeficiency Syndrome, Breast Neoplasms, Ovarian Neoplasms, Rhabdomyosarcoma, Neoplasms, Alzheimer Disease, Endomyocardial Fibrosis, Breast Neoplasms, M…	Crohn Disease, Lung Neoplasms, Leukemia, Monocytic, Acute	FALSE	FALSE	1	1	TDBPP
hsa-mir-29a	TET1	mirna-gene	Experimental	mirtarbase.adstudy	Acquired Immunodeficiency Syndrome, Heart Failure, Leukemia, Lymphocytic, Chronic, B-Cell, Lung Neoplasms, Lung Neoplasms, Neoplasms, Schizophrenia, Lymphoma, B-Cell, Alzheimer Disease, Precursor Cell Lymphoblastic Leukemia-Lymphoma, Acquired Immunodeficiency Syndrome, Breast Neoplasms, Ovarian Neoplasms, Rhabdomyosarcoma, Neoplasms, Alzheimer Disease, Endomyocardial Fibrosis, Breast Neoplasms, M…		FALSE	FALSE	1	1	TDBPP
hsa-mir-301a	SERPINE1	mirna-gene	Experimental	mirtarbase.adstudy	Salivary Gland Neoplasms, Adrenocortical Carcinoma, Lung Neoplasms, Lung Neoplasms, Breast Neoplasms, Parkinson Disease, Periodontitis, Carcinoma, Hepatocellular, Demyelinating Diseases, Prostatic Neoplasms, Stomach Neoplasms, Colorectal Neoplasms, Diabetes Mellitus	Diabetic Nephropathies, Pre-Eclampsia, Thrombosis, Atherosclerosis, Kidney Failure, Chronic, Stomach Neoplasms, Fatty Liver, Prostatic Neoplasms, Liver Neoplasms, Autistic Disorder, Behcet Syndrome, Glomerulosclerosis, Focal Segmental, Nephrotic Syndrome, Cholestasis, Diabetes Mellitus, Experimental, Nervous System Diseases, Plasminogen Activator Inhibitor-1 Deficiency	FALSE	FALSE	1	-1	TDBPP	anticorr
hsa-mir-31	NFAT5	mirna-gene	Experimental	mirtarbase.adstudy	Retinal Neovascularization, Retinal Neovascularization, Colorectal Neoplasms, Colorectal Neoplasms, Stomach Neoplasms, Medulloblastoma, Lung Neoplasms, Mouth Neoplasms, Carcinoma, Myocardial Infarction, Neoplasms, Ovarian Neoplasms, Schistosomiasis, Carcinoma, Leiomyosarcoma, Breast Neoplasms, Mouth Neoplasms, Adenocarcinoma, Mesothelioma, Neoplasms, Laryngeal Neoplasms, Muscular Dystrophy, Duche…		FALSE	FALSE	1	1	TDBPP
hsa-mir-34a	PEA15	mirna-gene	Experimental	mirtarbase.adstudy	Breast Neoplasms, Colonic Neoplasms, Lung Neoplasms, Muscular Disorders, Atrophic, Neuroblastoma, Lymphoma, B-Cell, Leukemia, Promyelocytic, Acute, Precursor Cell Lymphoblastic Leukemia-Lymphoma, Neoplasms, Neoplasms, Uterine Cervical Neoplasms, Stomach Neoplasms, Carcinoma, Hepatocellular, Carcinoma, Hepatocellular, Carcinoma, Hepatocellular, Melanoma, Lung Neoplasms, Leukemia, Lymphocytic, Chro…		FALSE	FALSE	1	1	TDBPP
hsa-mir-34a	CD44	mirna-gene	Experimental	mirtarbase.adstudy	Breast Neoplasms, Colonic Neoplasms, Lung Neoplasms, Muscular Disorders, Atrophic, Neuroblastoma, Lymphoma, B-Cell, Leukemia, Promyelocytic, Acute, Precursor Cell Lymphoblastic Leukemia-Lymphoma, Neoplasms, Neoplasms, Uterine Cervical Neoplasms, Stomach Neoplasms, Carcinoma, Hepatocellular, Carcinoma, Hepatocellular, Carcinoma, Hepatocellular, Melanoma, Lung Neoplasms, Leukemia, Lymphocytic, Chro…	Stomach Neoplasms, Leukemia, Promyelocytic, Acute, Pancreatic Neoplasms, Skin Diseases, Acute Kidney Injury, Arsenic Poisoning, Mammary Neoplasms, Experimental, Nerve Degeneration, Peripheral Nervous System Diseases, Vitiligo	FALSE	FALSE	1	1	TDBPP
hsa-mir-375	KCNQ2	mirna-gene	Experimental	mirtarbase	Diabetes Mellitus, Diabetes Mellitus, Salivary Gland Neoplasms, Adrenocortical Carcinoma, Liver Neoplasms, Carcinoma, Carcinoma, Carcinoma, Squamous Cell, Stomach Neoplasms, Laryngeal Neoplasms, Gastrointestinal Neoplasms, Stomach Neoplasms, Endometriosis, Adrenocortical Carcinoma, Esophageal Neoplasms, Esophageal Neoplasms, Prostatic Neoplasms, Carcinoma, Squamous Cell, Melanoma, Carcinoma, Squa…	SEIZURES, BENIGN FAMILIAL NEONATAL, 1, EPILEPTIC ENCEPHALOPATHY, EARLY INFANTILE, 7, Epilepsy, Epilepsy, Benign Neonatal, Developmental Disabilities, Nervous System Diseases	FALSE	FALSE	1	-1	TDBPP	anticorr
hsa-mir-9-5p	ONECUT2	mirna-gene	Experimental	mirtarbase			FALSE	FALSE	1	-1	TDBPP	anticorr
hsa-mir-9-5p	MMP13	mirna-gene	Experimental	mirtarbase		Spondyloepimetaphyseal Dysplasia, Missouri Type, Liver Cirrhosis, Experimental, Craniofacial Abnormalities, Prostatic Neoplasms	FALSE	FALSE	1	-1	TDBPP	anticorr
hsa-mir-92a-3p	HIPK3	mirna-gene	Experimental	mirtarbase			FALSE	FALSE	1	-1	TDBPP	anticorr
hsa-mir-92a-3p	ARID4B	mirna-gene	Experimental	mirtarbase		Carcinoma, Adenoid Cystic	FALSE	FALSE	1	-1	TDBPP	anticorr
hsa-mir-92a-3p	BMPR2	mirna-gene	Experimental	mirtarbase		Pulmonary arterial hypertension, Hypertension, Pulmonary, Pulmonary Veno-Occlusive Disease, Hyperandrogenism	FALSE	FALSE	1	-1	TDBPP	anticorr
hsa-mir-92a-3p	OSBPL2	mirna-gene	Experimental	mirtarbase			FALSE	FALSE	1	-1	TDBPP	anticorr
hsa-mir-93	CDKN1A	mirna-gene	Experimental	mirtarbase.adstudy	Ovarian Neoplasms, Ovarian Neoplasms, Breast Neoplasms, Melanoma, Autistic Disorder, Stomach Neoplasms, Ovarian Neoplasms, Prostatic Neoplasms, Neoplasms, Glioma, Prostatic Neoplasms, Carcinoma, Hepatocellular, Urinary Bladder Neoplasms, Lung Neoplasms, Trophoblasts, Neoplasms, Adenocarcinoma, Toxoplasmosis, Laryngeal Neoplasms, Mycosis Fungoides, Colorectal Neoplasms, Colorectal Neoplasms, Burki…	Colonic Neoplasms, Prostatic Neoplasms, Urinary Bladder Neoplasms, Lung Neoplasms, Papilloma, Stomach Neoplasms, Esophageal Squamous Cell Carcinoma, Carcinoma, Transitional Cell, Intestinal Neoplasms, HIV Infections, Kidney Diseases, Muscular Dystrophy, Facioscapulohumeral, Reperfusion Injury	FALSE	FALSE	1	-1	TDBPP	anticorr
CEBPB	SERPINE1	tf-gene	Experimental	Transfac	Carcinoma, Hepatocellular, Pulmonary Fibrosis, Brain Injuries, Brain Ischemia	Diabetic Nephropathies, Pre-Eclampsia, Thrombosis, Atherosclerosis, Kidney Failure, Chronic, Stomach Neoplasms, Fatty Liver, Prostatic Neoplasms, Liver Neoplasms, Autistic Disorder, Behcet Syndrome, Glomerulosclerosis, Focal Segmental, Nephrotic Syndrome, Cholestasis, Diabetes Mellitus, Experimental, Nervous System Diseases, Plasminogen Activator Inhibitor-1 Deficiency	FALSE	FALSE	1	1	TBBPA
CEBPB	IL1B	tf-gene	Experimental	Transfac	Carcinoma, Hepatocellular, Pulmonary Fibrosis, Brain Injuries, Brain Ischemia	Alzheimer Disease, Inflammation, Pneumonia, Pulmonary Fibrosis, Myocardial Infarction, Seizures, Stomach Neoplasms, Brain Injuries, Arthritis, Experimental, Diabetes Mellitus, Experimental, Drug-Induced Liver Injury, Fever, Hyperalgesia, Mucositis, Pleurisy, Arthritis, Rheumatoid, Multiple Sclerosis, Schizophrenia, Gastritis, Atrophic, Colitis, Ulcerative, Adenocarcinoma, Dermatomyositis, Stroke,…	FALSE	FALSE	1	1	TBBPA
FOS	FOS	tf-gene	Experimental	Transfac	Hypertension, Reperfusion Injury, Carcinoma, Hepatocellular, Breast Neoplasms, Endometriosis, Seizures, Amphetamine-Related Disorders, Amyotrophic lateral sclerosis 1, Anxiety Disorders, Brain Injuries, Cocaine-Related Disorders, Epilepsy, Fibrous Dysplasia of Bone, Hemorrhage, Hyperkinesis, Infarction, Middle Cerebral Artery, Lung Neoplasms, Nervous System Diseases, Neurotoxicity Syndromes, Stat…	Hypertension, Reperfusion Injury, Carcinoma, Hepatocellular, Breast Neoplasms, Endometriosis, Seizures, Amphetamine-Related Disorders, Amyotrophic lateral sclerosis 1, Anxiety Disorders, Brain Injuries, Cocaine-Related Disorders, Epilepsy, Fibrous Dysplasia of Bone, Hemorrhage, Hyperkinesis, Infarction, Middle Cerebral Artery, Lung Neoplasms, Nervous System Diseases, Neurotoxicity Syndromes, Stat…	FALSE	FALSE	1	1	TBBPA
FOS	HBB	tf-gene	Experimental	Transfac	Hypertension, Reperfusion Injury, Carcinoma, Hepatocellular, Breast Neoplasms, Endometriosis, Seizures, Amphetamine-Related Disorders, Amyotrophic lateral sclerosis 1, Anxiety Disorders, Brain Injuries, Cocaine-Related Disorders, Epilepsy, Fibrous Dysplasia of Bone, Hemorrhage, Hyperkinesis, Infarction, Middle Cerebral Artery, Lung Neoplasms, Nervous System Diseases, Neurotoxicity Syndromes, Stat…	beta-Thalassemia, Anemia, Sickle Cell, Hemoglobinopathies, Malaria, Falciparum, alpha-Thalassemia, Polycythemia Vera, Beta Thalassemia, Dominant Inclusion Body Type, Chloracne, Cyanosis, Heinz Body Anemias, Methemoglobinemia, Polycythemia	FALSE	FALSE	1	1	TBBPA
FOS	FOSL1	tf-gene	Experimental	Transfac	Hypertension, Reperfusion Injury, Carcinoma, Hepatocellular, Breast Neoplasms, Endometriosis, Seizures, Amphetamine-Related Disorders, Amyotrophic lateral sclerosis 1, Anxiety Disorders, Brain Injuries, Cocaine-Related Disorders, Epilepsy, Fibrous Dysplasia of Bone, Hemorrhage, Hyperkinesis, Infarction, Middle Cerebral Artery, Lung Neoplasms, Nervous System Diseases, Neurotoxicity Syndromes, Stat…		FALSE	FALSE	1	1	TBBPA
FOSL1	FOSL1	tf-gene	Experimental	Transfac			FALSE	FALSE	1	1	TBBPA
FOSL1	GSTP1	tf-gene	Experimental	Transfac		Lung Neoplasms, Asthma, Liver Neoplasms, Experimental, Parkinson Disease, Prostatic Neoplasms, Carcinoma, Stomach Neoplasms, Carcinoma, Hepatocellular, Hodgkin Disease, Peripheral Nervous System Diseases, Urinary Bladder Neoplasms, Prostatic Intraepithelial Neoplasia, Leukemia, Myelogenous, Chronic, BCR-ABL Positive, Osteosarcoma, Amphetamine-Related Disorders, Chromosome Aberrations, Carcinoma, …	FALSE	FALSE	1	1	TBBPA
FOSL2	CSH1	tf-gene	Experimental	PMID20584335		Silver-Russell Syndrome	FALSE	FALSE	-1	1	TBBPA	anticorr
FOSL2	FOSL1	tf-gene	Experimental	Transfac			FALSE	FALSE	1	1	TBBPA
IL1B	hsa-mir-146a	tf-mirna	Experimental	Transmir	Alzheimer Disease, Inflammation, Pneumonia, Pulmonary Fibrosis, Myocardial Infarction, Seizures, Stomach Neoplasms, Brain Injuries, Arthritis, Experimental, Diabetes Mellitus, Experimental, Drug-Induced Liver Injury, Fever, Hyperalgesia, Mucositis, Pleurisy, Arthritis, Rheumatoid, Multiple Sclerosis, Schizophrenia, Gastritis, Atrophic, Colitis, Ulcerative, Adenocarcinoma, Dermatomyositis, Stroke,…	Breast Neoplasms, Leukemia, Lymphocytic, Chronic, B-Cell, Lung Neoplasms, Muscular Disorders, Atrophic, Pancreatic Neoplasms, Prostatic Neoplasms, Psoriasis, Psoriasis, Thyroid Neoplasms, Thyroid Neoplasms, Thyroid Neoplasms, Thyroid Neoplasms, Thyroid Neoplasms, Lymphoma, B-Cell, Burkitt Lymphoma, Eczema, Alzheimer Disease, Autistic Disorder, Breast Neoplasms, Breast Neoplasms, Breast Neoplasms,…	FALSE	FALSE	1	1	TBBPA
IRF1	CTSS	tf-gene	Experimental	PMID20584335	Brain Injuries, STOMACH CARCINOMA, 5q- syndrome, Stomach Neoplasms, Lung Neoplasms, Myocardial Ischemia, Stroke	Obesity, Neoplasm Invasiveness	FALSE	FALSE	1	1	TBBPA
IRF1	ISG15	tf-gene	Experimental	Transfac	Brain Injuries, STOMACH CARCINOMA, 5q- syndrome, Stomach Neoplasms, Lung Neoplasms, Myocardial Ischemia, Stroke	Influenza, Human	FALSE	FALSE	1	1	TBBPA
IRF1	TAP1	tf-gene	Experimental	PMID20584335	Brain Injuries, STOMACH CARCINOMA, 5q- syndrome, Stomach Neoplasms, Lung Neoplasms, Myocardial Ischemia, Stroke	Bare Lymphocyte Syndrome, Type I, Myocardial Ischemia	FALSE	FALSE	1	1	TBBPA
IRF7	ISG15	tf-gene	Experimental	Transfac	Influenza, Human, Inflammation	Influenza, Human	FALSE	FALSE	1	1	TBBPA
IRF7	IRF7	tf-gene	Experimental	Transfac	Influenza, Human, Inflammation	Influenza, Human, Inflammation	FALSE	FALSE	1	1	TBBPA
JUNB	FOSL1	tf-gene	Experimental	Transfac	Myocardial Ischemia, Infarction, Middle Cerebral Artery, Lung Neoplasms, Status Epilepticus		FALSE	FALSE	1	1	TBBPA
TFE3	SERPINE1	tf-gene	Experimental	Transfac	Carcinoma, Renal Cell	Diabetic Nephropathies, Pre-Eclampsia, Thrombosis, Atherosclerosis, Kidney Failure, Chronic, Stomach Neoplasms, Fatty Liver, Prostatic Neoplasms, Liver Neoplasms, Autistic Disorder, Behcet Syndrome, Glomerulosclerosis, Focal Segmental, Nephrotic Syndrome, Cholestasis, Diabetes Mellitus, Experimental, Nervous System Diseases, Plasminogen Activator Inhibitor-1 Deficiency	FALSE	FALSE	1	1	TBBPA
VDR	CYP3A4	tf-gene	Experimental	Transfac	Vitamin D-Dependent Rickets, Type 2A, Osteoporosis, Rickets, Prostatic Neoplasms, Hypertension, Vitamin D Deficiency, Neoplasms, Alopecia, Uremia, Carcinoma, Transitional Cell, Epilepsy, Temporal Lobe, Genetic Diseases, Inborn, Leukemia, Lymphocytic, Chronic, B-Cell	Breast Neoplasms, Prostatic Neoplasms, Osteosarcoma, Hepatitis C, Torsades de Pointes	FALSE	FALSE	1	1	TBBPA
VDR	IGFBP1	tf-gene	Experimental	PMID20584335	Vitamin D-Dependent Rickets, Type 2A, Osteoporosis, Rickets, Prostatic Neoplasms, Hypertension, Vitamin D Deficiency, Neoplasms, Alopecia, Uremia, Carcinoma, Transitional Cell, Epilepsy, Temporal Lobe, Genetic Diseases, Inborn, Leukemia, Lymphocytic, Chronic, B-Cell	Endometriosis, Abortion, Spontaneous, Colonic Neoplasms, Drug Toxicity, Liver Cirrhosis, Biliary, Liver Cirrhosis, Experimental, Precancerous Conditions	FALSE	FALSE	1	1	TBBPA
hsa-mir-133a-3p	GSTP1	mirna-gene	Experimental	mirtarbase		Lung Neoplasms, Asthma, Liver Neoplasms, Experimental, Parkinson Disease, Prostatic Neoplasms, Carcinoma, Stomach Neoplasms, Carcinoma, Hepatocellular, Hodgkin Disease, Peripheral Nervous System Diseases, Urinary Bladder Neoplasms, Prostatic Intraepithelial Neoplasia, Leukemia, Myelogenous, Chronic, BCR-ABL Positive, Osteosarcoma, Amphetamine-Related Disorders, Chromosome Aberrations, Carcinoma, …	FALSE	FALSE	1	-1	TBBPA	anticorr
hsa-mir-133a-3p	MCL1	mirna-gene	Experimental	mirtarbase		Multiple Myeloma, Lung Neoplasms, Barrett Esophagus, Lymphoma, T-Cell, Cutaneous, Sarcoma	FALSE	FALSE	1	-1	TBBPA	anticorr
hsa-mir-138-5p	H2AFX	mirna-gene	Experimental	mirtarbase		Breast Neoplasms	FALSE	FALSE	1	-1	TBBPA	anticorr
hsa-mir-139-5p	FOS	mirna-gene	Experimental	mirtarbase		Hypertension, Reperfusion Injury, Carcinoma, Hepatocellular, Breast Neoplasms, Endometriosis, Seizures, Amphetamine-Related Disorders, Amyotrophic lateral sclerosis 1, Anxiety Disorders, Brain Injuries, Cocaine-Related Disorders, Epilepsy, Fibrous Dysplasia of Bone, Hemorrhage, Hyperkinesis, Infarction, Middle Cerebral Artery, Lung Neoplasms, Nervous System Diseases, Neurotoxicity Syndromes, Stat…	FALSE	FALSE	1	-1	TBBPA	anticorr
hsa-mir-146a	TMSB15A	mirna-gene	Experimental	mirrecords.adstudy	Breast Neoplasms, Leukemia, Lymphocytic, Chronic, B-Cell, Lung Neoplasms, Muscular Disorders, Atrophic, Pancreatic Neoplasms, Prostatic Neoplasms, Psoriasis, Psoriasis, Thyroid Neoplasms, Thyroid Neoplasms, Thyroid Neoplasms, Thyroid Neoplasms, Thyroid Neoplasms, Lymphoma, B-Cell, Burkitt Lymphoma, Eczema, Alzheimer Disease, Autistic Disorder, Breast Neoplasms, Breast Neoplasms, Breast Neoplasms,…		FALSE	FALSE	1	1	TBBPA
hsa-mir-150	IGF2	mirna-gene	Experimental	mirtarbase.adstudy	Cardiomyopathy, Hypertrophic, Cardiomyopathy, Hypertrophic, Heart Failure, Lung Neoplasms, Polycythemia Vera, Lymphoma, B-Cell, Retinal Neovascularization, Retinal Neovascularization, Polycythemia Vera, ACTH-Secreting Pituitary Adenoma, Endometriosis, Stomach Neoplasms, Lupus Vulgaris, Marek Disease, Stomach Neoplasms, Myocardial Infarction, Hepatoblastoma, Carcinoma, Hepatocellular, Adenoviridae…	Carcinoma, Hepatocellular, Alzheimer Disease, Beckwith-Wiedemann Syndrome, Wilms Tumor, Colorectal Neoplasms, Obesity, Rhabdomyosarcoma, Atherosclerosis, Silver-Russell Syndrome, Parkinson Disease, Hypoglycemia, Fetal Growth Retardation, Autistic Disorder, Abortion, Spontaneous, Liver Neoplasms, Colonic Neoplasms, Precancerous Conditions, Anemia, Bone Diseases, Developmental, Cognition Disorders,…	FALSE	FALSE	1	-1	TBBPA	anticorr
hsa-mir-181b-5p	CBX7	mirna-gene	Experimental	mirtarbase			FALSE	FALSE	1	-1	TBBPA	anticorr
hsa-mir-181b-5p	MCL1	mirna-gene	Experimental	mirtarbase		Multiple Myeloma, Lung Neoplasms, Barrett Esophagus, Lymphoma, T-Cell, Cutaneous, Sarcoma	FALSE	FALSE	1	-1	TBBPA	anticorr
hsa-mir-200c-3p	KLF9	mirna-gene	Experimental	mirtarbase		Body Weight, Endometriosis	FALSE	FALSE	1	-1	TBBPA	anticorr
hsa-mir-200c-3p	UBE2I	mirna-gene	Experimental	mirtarbase		Carcinoma, Mammary Neoplasms, Animal, Mammary Neoplasms, Experimental	FALSE	FALSE	1	-1	TBBPA	anticorr
hsa-mir-200c-3p	FN1	mirna-gene	Experimental	mirtarbase		Glomerulopathy with fibronectin deposits, Carcinoma, Diabetes Mellitus, Crohn Disease, Glioblastoma, Hypertension, Aortic Valve Insufficiency, Glomerulosclerosis, Focal Segmental, Abortion, Spontaneous, Hypertrophy, Left Ventricular, Mammary Neoplasms, Animal, Mammary Neoplasms, Experimental	FALSE	FALSE	1	-1	TBBPA	anticorr
hsa-mir-21	IL1B	mirna-gene	Experimental	mirtarbase.adstudy	Brain Neoplasms, Brain Neoplasms, Breast Neoplasms, Breast Neoplasms, Breast Neoplasms, Breast Neoplasms, Breast Neoplasms, Cholangiocarcinoma, Colonic Neoplasms, Dermatitis, Atopic, Focal Epithelial Hyperplasia, Glioblastoma, Glioblastoma, Glioblastoma, Glioblastoma, Glioblastoma, Glioblastoma, Heart Diseases, Heart Failure, Lung Neoplasms, Lung Neoplasms, Lymphoma, Large B-Cell, Diffuse, Muscul…	Alzheimer Disease, Inflammation, Pneumonia, Pulmonary Fibrosis, Myocardial Infarction, Seizures, Stomach Neoplasms, Brain Injuries, Arthritis, Experimental, Diabetes Mellitus, Experimental, Drug-Induced Liver Injury, Fever, Hyperalgesia, Mucositis, Pleurisy, Arthritis, Rheumatoid, Multiple Sclerosis, Schizophrenia, Gastritis, Atrophic, Colitis, Ulcerative, Adenocarcinoma, Dermatomyositis, Stroke,…	FALSE	FALSE	1	1	TBBPA
hsa-mir-21	RPS7	mirna-gene	Experimental	mirtarbase.adstudy	Brain Neoplasms, Brain Neoplasms, Breast Neoplasms, Breast Neoplasms, Breast Neoplasms, Breast Neoplasms, Breast Neoplasms, Cholangiocarcinoma, Colonic Neoplasms, Dermatitis, Atopic, Focal Epithelial Hyperplasia, Glioblastoma, Glioblastoma, Glioblastoma, Glioblastoma, Glioblastoma, Glioblastoma, Heart Diseases, Heart Failure, Lung Neoplasms, Lung Neoplasms, Lymphoma, Large B-Cell, Diffuse, Muscul…	Breast Neoplasms, Diamond-Blackfan Anemia 8	FALSE	FALSE	1	1	TBBPA
hsa-mir-216a	CD44	mirna-gene	Experimental	mirtarbase.adstudy	Lung Neoplasms, Melanoma, Fatty Liver, Pancreatic Neoplasms, Carcinoma, Hepatocellular, Heart Failure, Pancreatic Neoplasms, Pancreatic Neoplasms, Carcinoma, Hepatocellular	Stomach Neoplasms, Leukemia, Promyelocytic, Acute, Pancreatic Neoplasms, Skin Diseases, Acute Kidney Injury, Arsenic Poisoning, Mammary Neoplasms, Experimental, Nerve Degeneration, Peripheral Nervous System Diseases, Vitiligo	FALSE	FALSE	1	-1	TBBPA	anticorr
RARG	RARG	tf-gene	Experimental	Transfac	Cleft Palate, Musculoskeletal Abnormalities	Cleft Palate, Musculoskeletal Abnormalities	FALSE	FALSE	1	1	TBBPA-DBPE
RXRA	SEMA6B	tf-gene	Experimental	PMID20584335	Prostatic Neoplasms, Amyotrophic lateral sclerosis 1, Sciatic Neuropathy		FALSE	FALSE	1	1	TBBPA-DBPE
RXRA	RARG	tf-gene	Experimental	Transfac	Prostatic Neoplasms, Amyotrophic lateral sclerosis 1, Sciatic Neuropathy	Cleft Palate, Musculoskeletal Abnormalities	FALSE	FALSE	1	1	TBBPA-DBPE
hsa-let-7b	DOCK5	mirna-gene	Experimental	mirtarbase.adstudy	Colonic Neoplasms, Heart Failure, Lung Neoplasms, Lung Neoplasms, Lung Neoplasms, Lung Neoplasms, Lung Neoplasms, Lung Neoplasms, Lung Neoplasms, Neoplasms, Neoplasms, Neoplasms, Ovarian Neoplasms, Neoplasms, Digestive System Neoplasms, Head and Neck Neoplasms, Neoplasms, Sarcoma, Kaposi, Lung Neoplasms, Melanoma, Pancreatic Neoplasms, Pituitary Neoplasms, Lymphoma, Primary Effusion, Adrenocortic…		FALSE	FALSE	1	-1	TBBPA-DBPE	anticorr
hsa-let-7b	MAP7D1	mirna-gene	Experimental	mirtarbase.adstudy	Colonic Neoplasms, Heart Failure, Lung Neoplasms, Lung Neoplasms, Lung Neoplasms, Lung Neoplasms, Lung Neoplasms, Lung Neoplasms, Lung Neoplasms, Neoplasms, Neoplasms, Neoplasms, Ovarian Neoplasms, Neoplasms, Digestive System Neoplasms, Head and Neck Neoplasms, Neoplasms, Sarcoma, Kaposi, Lung Neoplasms, Melanoma, Pancreatic Neoplasms, Pituitary Neoplasms, Lymphoma, Primary Effusion, Adrenocortic…		FALSE	FALSE	-1	-1	TBBPA-DBPE
hsa-let-7c-5p	TGFBR1	mirna-gene	Experimental	mirtarbase		LOEYS-DIETZ SYNDROME, TYPE 1A, Loeys-Dietz Syndrome, Type 2A, Keratoacanthoma familial, Colorectal Neoplasms, Loeys-Dietz Syndrome, Skin Neoplasms, Aneurysm, Dissecting, Abortion, Spontaneous, Auditory Neuropathy, Autosomal Dominant, 1, Uremia	FALSE	FALSE	1	-1	TBBPA-DBPE	anticorr
hsa-mir-124-3p	NR3C2	mirna-gene	Experimental	mirtarbase		Hypertension, Early-Onset, Autosomal Dominant, with Severe Exacerbation in Pregnancy, PSEUDOHYPOALDOSTERONISM, TYPE I, AUTOSOMAL DOMINANT, Pseudohypoaldosteronism, Cardiomyopathy, Dilated, Heart Failure, Myocardial Infarction, Endometriosis, Ventricular Dysfunction, Left	FALSE	FALSE	1	-1	TBBPA-DBPE	anticorr
hsa-mir-125b-5p	TNFAIP3	mirna-gene	Experimental	mirtarbase		Lupus Erythematosus, Systemic, Arthritis, Rheumatoid, Psoriasis	FALSE	FALSE	1	-1	TBBPA-DBPE	anticorr
hsa-mir-125b-5p	VDR	mirna-gene	Experimental	mirtarbase		Vitamin D-Dependent Rickets, Type 2A, Osteoporosis, Rickets, Prostatic Neoplasms, Hypertension, Vitamin D Deficiency, Neoplasms, Alopecia, Uremia, Carcinoma, Transitional Cell, Epilepsy, Temporal Lobe, Genetic Diseases, Inborn, Leukemia, Lymphocytic, Chronic, B-Cell	FALSE	FALSE	1	-1	TBBPA-DBPE	anticorr
hsa-mir-125b-5p	KLF13	mirna-gene	Experimental	mirtarbase		Endometriosis	FALSE	FALSE	1	-1	TBBPA-DBPE	anticorr
hsa-mir-141-3p	CLOCK	mirna-gene	Experimental	mirtarbase			FALSE	FALSE	1	-1	TBBPA-DBPE	anticorr
hsa-mir-141-3p	ZEB1	mirna-gene	Experimental	mirtarbase		Corneal Dystrophy, Fuchs Endothelial, 6, Corneal Dystrophy, Posterior Polymorphous, 3, Breast Neoplasms, Cell Transformation, Neoplastic, Disease Progression, Myocardial Ischemia, Neoplasm Invasiveness	FALSE	FALSE	1	-1	TBBPA-DBPE	anticorr
hsa-mir-143	DNMT3A	mirna-gene	Experimental	mirtarbase.adstudy	Breast Neoplasms, Colonic Neoplasms, Colonic Neoplasms, Colonic Neoplasms, Colonic Neoplasms, Colonic Neoplasms, Colorectal Neoplasms, Hepatitis, Chronic, Hepatitis, Chronic, Lung Neoplasms, Muscular Disorders, Atrophic, Obesity, ACTH-Secreting Pituitary Adenoma, Barrett Esophagus, Urinary Bladder Neoplasms, Uterine Cervical Neoplasms, Colorectal Neoplasms, Colorectal Neoplasms, Endometriosis, Ob…	Crohn Disease, Lung Neoplasms, Leukemia, Monocytic, Acute	FALSE	FALSE	1	1	TBBPA-DBPE
hsa-mir-146a	NFIX	mirna-gene	Experimental	mirrecords.adstudy	Breast Neoplasms, Leukemia, Lymphocytic, Chronic, B-Cell, Lung Neoplasms, Muscular Disorders, Atrophic, Pancreatic Neoplasms, Prostatic Neoplasms, Psoriasis, Psoriasis, Thyroid Neoplasms, Thyroid Neoplasms, Thyroid Neoplasms, Thyroid Neoplasms, Thyroid Neoplasms, Lymphoma, B-Cell, Burkitt Lymphoma, Eczema, Alzheimer Disease, Autistic Disorder, Breast Neoplasms, Breast Neoplasms, Breast Neoplasms,…		FALSE	FALSE	1	1	TBBPA-DBPE
hsa-mir-15a-5p	WNT3A	mirna-gene	Experimental	mirtarbase			FALSE	FALSE	1	-1	TBBPA-DBPE	anticorr
hsa-mir-182-5p	CLOCK	mirna-gene	Experimental	mirtarbase			FALSE	FALSE	1	-1	TBBPA-DBPE	anticorr
hsa-mir-182-5p	FOXO1	mirna-gene	Experimental	mirtarbase		Rhabdomyosarcoma, Alveolar, Leukemia, Myeloid, Acute, Keratoconus	FALSE	FALSE	1	-1	TBBPA-DBPE	anticorr
hsa-mir-182-5p	RARG	mirna-gene	Experimental	mirtarbase		Cleft Palate, Musculoskeletal Abnormalities	FALSE	FALSE	1	-1	TBBPA-DBPE	anticorr
hsa-mir-18a	CSRNP3	mirna-gene	Experimental	mirtarbase.adstudy	Carcinoma, Hepatocellular, Carcinoma, Hepatocellular, Colonic Neoplasms, Hematologic Neoplasms, Leukemia, B-Cell, Leukemia, B-Cell, Leukemia, B-Cell, Leukemia, B-Cell, Lung Neoplasms, Lung Neoplasms, Lung Neoplasms, Lymphoma, Lymphoma, Lymphoma, B-Cell, Neoplasms, Ovarian Neoplasms, Melanoma, Breast Neoplasms, Ovarian Neoplasms, Lymphoma, B-Cell, Colorectal Neoplasms, Stomach Neoplasms, Head and …	Abortion, Spontaneous, Substance-Related Disorders	FALSE	FALSE	1	-1	TBBPA-DBPE	anticorr
hsa-mir-196a-5p	ANXA1	mirna-gene	Experimental	mirtarbase		Neoplasm Metastasis, Mammary Neoplasms, Experimental, Carcinoma, Squamous Cell, Prostatic Neoplasms, Carcinoma, Adenocarcinoma of lung, Esophageal Squamous Cell Carcinoma, Lymphatic Metastasis, Craniofacial Abnormalities, Kidney Diseases, Mammary Neoplasms, Animal, Mouth Neoplasms, Neoplasm Invasiveness, Stomach Diseases	FALSE	FALSE	-1	-1	TBBPA-DBPE
hsa-mir-19b-3p	ARID4B	mirna-gene	Experimental	mirtarbase		Carcinoma, Adenoid Cystic	FALSE	FALSE	1	-1	TBBPA-DBPE	anticorr
hsa-mir-19b-3p	ATXN1	mirna-gene	Experimental	mirtarbase		Spinocerebellar Ataxias	FALSE	FALSE	1	-1	TBBPA-DBPE	anticorr
hsa-mir-19b-3p	BMPR2	mirna-gene	Experimental	mirtarbase		Pulmonary arterial hypertension, Hypertension, Pulmonary, Pulmonary Veno-Occlusive Disease, Hyperandrogenism	FALSE	FALSE	1	-1	TBBPA-DBPE	anticorr
hsa-mir-19b-3p	HIPK3	mirna-gene	Experimental	mirtarbase			FALSE	FALSE	1	-1	TBBPA-DBPE	anticorr
hsa-mir-200a-3p	ZEB1	mirna-gene	Experimental	mirtarbase		Corneal Dystrophy, Fuchs Endothelial, 6, Corneal Dystrophy, Posterior Polymorphous, 3, Breast Neoplasms, Cell Transformation, Neoplastic, Disease Progression, Myocardial Ischemia, Neoplasm Invasiveness	FALSE	FALSE	1	-1	TBBPA-DBPE	anticorr
hsa-mir-375	KCNQ2	mirna-gene	Experimental	mirtarbase	Diabetes Mellitus, Diabetes Mellitus, Salivary Gland Neoplasms, Adrenocortical Carcinoma, Liver Neoplasms, Carcinoma, Carcinoma, Carcinoma, Squamous Cell, Stomach Neoplasms, Laryngeal Neoplasms, Gastrointestinal Neoplasms, Stomach Neoplasms, Endometriosis, Adrenocortical Carcinoma, Esophageal Neoplasms, Esophageal Neoplasms, Prostatic Neoplasms, Carcinoma, Squamous Cell, Melanoma, Carcinoma, Squa…	SEIZURES, BENIGN FAMILIAL NEONATAL, 1, EPILEPTIC ENCEPHALOPATHY, EARLY INFANTILE, 7, Epilepsy, Epilepsy, Benign Neonatal, Developmental Disabilities, Nervous System Diseases	FALSE	FALSE	1	-1	TBBPA-DBPE	anticorr
hsa-mir-92a-3p	ARID4B	mirna-gene	Experimental	mirtarbase		Carcinoma, Adenoid Cystic	FALSE	FALSE	1	-1	TBBPA-DBPE	anticorr
hsa-mir-92a-3p	BMPR2	mirna-gene	Experimental	mirtarbase		Pulmonary arterial hypertension, Hypertension, Pulmonary, Pulmonary Veno-Occlusive Disease, Hyperandrogenism	FALSE	FALSE	1	-1	TBBPA-DBPE	anticorr
hsa-mir-92a-3p	HIPK3	mirna-gene	Experimental	mirtarbase			FALSE	FALSE	1	-1	TBBPA-DBPE	anticorr
hsa-mir-92a-3p	OSBPL2	mirna-gene	Experimental	mirtarbase			FALSE	FALSE	1	-1	TBBPA-DBPE	anticorr
hsa-mir-96-5p	FOXO1	mirna-gene	Experimental	mirtarbase		Rhabdomyosarcoma, Alveolar, Leukemia, Myeloid, Acute, Keratoconus	FALSE	FALSE	1	1	TBBPA-DBPE
RARG	RARG	tf-gene	Experimental	Transfac	Cleft Palate, Musculoskeletal Abnormalities	Cleft Palate, Musculoskeletal Abnormalities	FALSE	FALSE	1	1	TCEP
RXRA	SEMA6B	tf-gene	Experimental	PMID20584335	Prostatic Neoplasms, Amyotrophic lateral sclerosis 1, Sciatic Neuropathy		FALSE	FALSE	1	1	TCEP
RXRA	RARG	tf-gene	Experimental	Transfac	Prostatic Neoplasms, Amyotrophic lateral sclerosis 1, Sciatic Neuropathy	Cleft Palate, Musculoskeletal Abnormalities	FALSE	FALSE	1	1	TCEP
hsa-mir-124-3p	NR3C2	mirna-gene	Experimental	mirtarbase		Hypertension, Early-Onset, Autosomal Dominant, with Severe Exacerbation in Pregnancy, PSEUDOHYPOALDOSTERONISM, TYPE I, AUTOSOMAL DOMINANT, Pseudohypoaldosteronism, Cardiomyopathy, Dilated, Heart Failure, Myocardial Infarction, Endometriosis, Ventricular Dysfunction, Left	FALSE	FALSE	1	-1	TCEP	anticorr
hsa-mir-125b-5p	TNFAIP3	mirna-gene	Experimental	mirtarbase		Lupus Erythematosus, Systemic, Arthritis, Rheumatoid, Psoriasis	FALSE	FALSE	1	-1	TCEP	anticorr
hsa-mir-125b-5p	VDR	mirna-gene	Experimental	mirtarbase		Vitamin D-Dependent Rickets, Type 2A, Osteoporosis, Rickets, Prostatic Neoplasms, Hypertension, Vitamin D Deficiency, Neoplasms, Alopecia, Uremia, Carcinoma, Transitional Cell, Epilepsy, Temporal Lobe, Genetic Diseases, Inborn, Leukemia, Lymphocytic, Chronic, B-Cell	FALSE	FALSE	1	-1	TCEP	anticorr
hsa-mir-125b-5p	KLF13	mirna-gene	Experimental	mirtarbase		Endometriosis	FALSE	FALSE	1	-1	TCEP	anticorr
hsa-mir-128-3p	TGFBR1	mirna-gene	Experimental	mirtarbase		LOEYS-DIETZ SYNDROME, TYPE 1A, Loeys-Dietz Syndrome, Type 2A, Keratoacanthoma familial, Colorectal Neoplasms, Loeys-Dietz Syndrome, Skin Neoplasms, Aneurysm, Dissecting, Abortion, Spontaneous, Auditory Neuropathy, Autosomal Dominant, 1, Uremia	FALSE	FALSE	1	-1	TCEP	anticorr
hsa-mir-138-5p	MXD1	mirna-gene	Experimental	mirtarbase		Dermatitis, Allergic Contact	FALSE	FALSE	1	-1	TCEP	anticorr
hsa-mir-143	DNMT3A	mirna-gene	Experimental	mirtarbase.adstudy	Breast Neoplasms, Colonic Neoplasms, Colonic Neoplasms, Colonic Neoplasms, Colonic Neoplasms, Colonic Neoplasms, Colorectal Neoplasms, Hepatitis, Chronic, Hepatitis, Chronic, Lung Neoplasms, Muscular Disorders, Atrophic, Obesity, ACTH-Secreting Pituitary Adenoma, Barrett Esophagus, Urinary Bladder Neoplasms, Uterine Cervical Neoplasms, Colorectal Neoplasms, Colorectal Neoplasms, Endometriosis, Ob…	Crohn Disease, Lung Neoplasms, Leukemia, Monocytic, Acute	FALSE	FALSE	1	-1	TCEP	anticorr
hsa-mir-146a	NFIX	mirna-gene	Experimental	mirrecords.adstudy	Breast Neoplasms, Leukemia, Lymphocytic, Chronic, B-Cell, Lung Neoplasms, Muscular Disorders, Atrophic, Pancreatic Neoplasms, Prostatic Neoplasms, Psoriasis, Psoriasis, Thyroid Neoplasms, Thyroid Neoplasms, Thyroid Neoplasms, Thyroid Neoplasms, Thyroid Neoplasms, Lymphoma, B-Cell, Burkitt Lymphoma, Eczema, Alzheimer Disease, Autistic Disorder, Breast Neoplasms, Breast Neoplasms, Breast Neoplasms,…		FALSE	FALSE	1	1	TCEP
hsa-mir-18a	CSRNP3	mirna-gene	Experimental	mirtarbase.adstudy	Carcinoma, Hepatocellular, Carcinoma, Hepatocellular, Colonic Neoplasms, Hematologic Neoplasms, Leukemia, B-Cell, Leukemia, B-Cell, Leukemia, B-Cell, Leukemia, B-Cell, Lung Neoplasms, Lung Neoplasms, Lung Neoplasms, Lymphoma, Lymphoma, Lymphoma, B-Cell, Neoplasms, Ovarian Neoplasms, Melanoma, Breast Neoplasms, Ovarian Neoplasms, Lymphoma, B-Cell, Colorectal Neoplasms, Stomach Neoplasms, Head and …	Abortion, Spontaneous, Substance-Related Disorders	FALSE	FALSE	1	-1	TCEP	anticorr
hsa-mir-200a-3p	ZEB1	mirna-gene	Experimental	mirtarbase		Corneal Dystrophy, Fuchs Endothelial, 6, Corneal Dystrophy, Posterior Polymorphous, 3, Breast Neoplasms, Cell Transformation, Neoplastic, Disease Progression, Myocardial Ischemia, Neoplasm Invasiveness	FALSE	FALSE	1	-1	TCEP	anticorr
hsa-mir-200b-3p	ZEB1	mirna-gene	Experimental	mirtarbase		Corneal Dystrophy, Fuchs Endothelial, 6, Corneal Dystrophy, Posterior Polymorphous, 3, Breast Neoplasms, Cell Transformation, Neoplastic, Disease Progression, Myocardial Ischemia, Neoplasm Invasiveness	FALSE	FALSE	1	-1	TCEP	anticorr
hsa-mir-375	KCNQ2	mirna-gene	Experimental	mirtarbase	Diabetes Mellitus, Diabetes Mellitus, Salivary Gland Neoplasms, Adrenocortical Carcinoma, Liver Neoplasms, Carcinoma, Carcinoma, Carcinoma, Squamous Cell, Stomach Neoplasms, Laryngeal Neoplasms, Gastrointestinal Neoplasms, Stomach Neoplasms, Endometriosis, Adrenocortical Carcinoma, Esophageal Neoplasms, Esophageal Neoplasms, Prostatic Neoplasms, Carcinoma, Squamous Cell, Melanoma, Carcinoma, Squa…	SEIZURES, BENIGN FAMILIAL NEONATAL, 1, EPILEPTIC ENCEPHALOPATHY, EARLY INFANTILE, 7, Epilepsy, Epilepsy, Benign Neonatal, Developmental Disabilities, Nervous System Diseases	FALSE	FALSE	1	-1	TCEP	anticorr
hsa-mir-92a-3p	ARID4B	mirna-gene	Experimental	mirtarbase		Carcinoma, Adenoid Cystic	FALSE	FALSE	1	-1	TCEP	anticorr
hsa-mir-92a-3p	BMPR2	mirna-gene	Experimental	mirtarbase		Pulmonary arterial hypertension, Hypertension, Pulmonary, Pulmonary Veno-Occlusive Disease, Hyperandrogenism	FALSE	FALSE	1	-1	TCEP	anticorr
hsa-mir-92a-3p	OSBPL2	mirna-gene	Experimental	mirtarbase			FALSE	FALSE	1	-1	TCEP	anticorr
hsa-mir-92a-3p	HIPK3	mirna-gene	Experimental	mirtarbase			FALSE	FALSE	1	-1	TCEP	anticorr
hsa-mir-96-5p	FOXO1	mirna-gene	Experimental	mirtarbase		Rhabdomyosarcoma, Alveolar, Leukemia, Myeloid, Acute, Keratoconus	FALSE	FALSE	1	1	TCEP

## Sheet: Table S2.2-BDE-47-exp+predic
regulator	target	category	evidence	source	regulator.association.disease	target.association.disease	is_regulator_in_disease	is_target_in_disease	target.reg	regulator.reg
RARG	RARG	tf-gene	Experimental	Transfac	Cleft Palate, Musculoskeletal Abnormalities	Cleft Palate, Musculoskeletal Abnormalities	FALSE	FALSE	1	1
RXRA	SEMA6B	tf-gene	Experimental	PMID20584335	Prostatic Neoplasms, Amyotrophic lateral sclerosis 1, Sciatic Neuropathy		FALSE	FALSE	1	1
RXRA	RARG	tf-gene	Experimental	Transfac	Prostatic Neoplasms, Amyotrophic lateral sclerosis 1, Sciatic Neuropathy	Cleft Palate, Musculoskeletal Abnormalities	FALSE	FALSE	1	1
RXRA	hsa-mir-146a	tf-mirna	Predicted	Chipbase	Prostatic Neoplasms, Amyotrophic lateral sclerosis 1, Sciatic Neuropathy	Breast Neoplasms, Leukemia, Lymphocytic, Chronic, B-Cell, Lung Neoplasms, Muscular Disorders, Atrophic, Pancreatic Neoplasms, Prostatic Neoplasms, Psoriasis, Psoriasis, Thyroid Neoplasms, Thyroid Neoplasms, Thyroid Neoplasms, Thyroid Neoplasms, Thyroid Neoplasms, Lymphoma, B-Cell, Burkitt Lymphoma, Eczema, Alzheimer Disease, Autistic Disorder, Breast Neoplasms, Breast Neoplasms, Breast Neoplasms,…	FALSE	FALSE	1	1
RXRA	hsa-mir-146b	tf-mirna	Predicted	Chipbase	Prostatic Neoplasms, Amyotrophic lateral sclerosis 1, Sciatic Neuropathy	Breast Neoplasms, Leukemia, Lymphocytic, Chronic, B-Cell, Lung Neoplasms, Muscular Disorders, Atrophic, Muscular Disorders, Atrophic, Pancreatic Neoplasms, Prostatic Neoplasms, Psoriasis, Thyroid Neoplasms, Thyroid Neoplasms, Thyroid Neoplasms, Thyroid Neoplasms, Thyroid Neoplasms, Autistic Disorder, Autistic Disorder, Breast Neoplasms, Breast Neoplasms, Glioma, Head and Neck Neoplasms, Thyroid N…	FALSE	FALSE	1	1
RXRA	hsa-mir-196b	tf-mirna	Predicted	Chipbase	Prostatic Neoplasms, Amyotrophic lateral sclerosis 1, Sciatic Neuropathy	Neoplasms, Endometriosis, Hepatitis C, Leukemia, Neutropenia, Leukemia, Myeloid, Acute, Leukemia, Myeloid, Acute, Leukemia, Lymphocytic, Chronic, B-Cell, Adenoviridae Infections, Prostatic Neoplasms, Crohn Disease, Urinary Bladder Neoplasms, Hepatitis C, Leukemia, Myeloid, Acute, Glioblastoma, Precursor Cell Lymphoblastic Leukemia-Lymphoma, Pancreatic Neoplasms, Stomach Neoplasms, Leukemia, Gliob…	FALSE	FALSE	-1	1
STAT5A	PAX5	tf-gene	Predicted	TRED	Mammary Neoplasms, Experimental, Breast Neoplasms, Adenocarcinoma, Carcinoma, Carcinoma, Ductal, Carcinoma, Intraductal, Noninfiltrating, Carcinoma, Lobular, Lung Neoplasms, Mammary Neoplasms, Animal, Myocardial Ischemia, Precancerous Conditions		FALSE	FALSE	1	1
hsa-mir-125b-5p	GRB10	mirna-gene	Predicted	Starbase			FALSE	FALSE	1	-1
hsa-mir-125b-5p	ATXN1	mirna-gene	Predicted	Starbase		Spinocerebellar Ataxias	FALSE	FALSE	1	-1
hsa-mir-125b-5p	LIFR	mirna-gene	Predicted	Starbase		Stuve-Wiedemann syndrome, Polycystic Ovary Syndrome, Prostatic Neoplasms	FALSE	FALSE	1	-1
hsa-mir-125b-5p	VDR	mirna-gene	Experimental	mirtarbase		Vitamin D-Dependent Rickets, Type 2A, Osteoporosis, Rickets, Prostatic Neoplasms, Hypertension, Vitamin D Deficiency, Neoplasms, Alopecia, Uremia, Carcinoma, Transitional Cell, Epilepsy, Temporal Lobe, Genetic Diseases, Inborn, Leukemia, Lymphocytic, Chronic, B-Cell	FALSE	FALSE	1	-1
hsa-mir-125b-5p	MAP3K10	mirna-gene	Predicted	Starbase			FALSE	FALSE	1	-1
hsa-mir-125b-5p	SLC7A1	mirna-gene	Predicted	Starbase		Prostatic Neoplasms	FALSE	FALSE	1	-1
hsa-mir-125b-5p	ATP13A3	mirna-gene	Predicted	Starbase			FALSE	FALSE	1	-1
hsa-mir-125b-5p	TNFAIP3	mirna-gene	Experimental	mirtarbase		Lupus Erythematosus, Systemic, Arthritis, Rheumatoid, Psoriasis	FALSE	FALSE	1	-1
hsa-mir-125b-5p	KLF13	mirna-gene	Experimental	mirtarbase		Endometriosis	FALSE	FALSE	1	-1
hsa-mir-143	DNMT3A	mirna-gene	Experimental	mirtarbase.adstudy	Breast Neoplasms, Colonic Neoplasms, Colonic Neoplasms, Colonic Neoplasms, Colonic Neoplasms, Colonic Neoplasms, Colorectal Neoplasms, Hepatitis, Chronic, Hepatitis, Chronic, Lung Neoplasms, Muscular Disorders, Atrophic, Obesity, ACTH-Secreting Pituitary Adenoma, Barrett Esophagus, Urinary Bladder Neoplasms, Uterine Cervical Neoplasms, Colorectal Neoplasms, Colorectal Neoplasms, Endometriosis, Ob…	Crohn Disease, Lung Neoplasms, Leukemia, Monocytic, Acute	FALSE	FALSE	1	1
hsa-mir-146a	NFIX	mirna-gene	Experimental	mirrecords.adstudy	Breast Neoplasms, Leukemia, Lymphocytic, Chronic, B-Cell, Lung Neoplasms, Muscular Disorders, Atrophic, Pancreatic Neoplasms, Prostatic Neoplasms, Psoriasis, Psoriasis, Thyroid Neoplasms, Thyroid Neoplasms, Thyroid Neoplasms, Thyroid Neoplasms, Thyroid Neoplasms, Lymphoma, B-Cell, Burkitt Lymphoma, Eczema, Alzheimer Disease, Autistic Disorder, Breast Neoplasms, Breast Neoplasms, Breast Neoplasms,…		FALSE	FALSE	1	1
hsa-mir-15b-5p	AGAP3	mirna-gene	Predicted	Starbase			FALSE	FALSE	1	1
hsa-mir-15b-5p	ATP13A3	mirna-gene	Predicted	Starbase			FALSE	FALSE	1	1
hsa-mir-15b-5p	CRIM1	mirna-gene	Predicted	Starbase			FALSE	FALSE	1	1
hsa-mir-15b-5p	MAFK	mirna-gene	Predicted	Starbase			FALSE	FALSE	1	1
hsa-mir-15b-5p	FOXO1	mirna-gene	Predicted	Starbase		Rhabdomyosarcoma, Alveolar, Leukemia, Myeloid, Acute, Keratoconus	FALSE	FALSE	1	1
hsa-mir-15b-5p	NAV1	mirna-gene	Predicted	Starbase			FALSE	FALSE	1	1
hsa-mir-15b-5p	PLXNA2	mirna-gene	Predicted	Starbase		Schizophrenia	FALSE	FALSE	1	1
hsa-mir-15b-5p	MAP4	mirna-gene	Predicted	Starbase		Weight Gain	FALSE	FALSE	1	1
hsa-mir-15b-5p	TGFBR3	mirna-gene	Predicted	Starbase			FALSE	FALSE	1	1
hsa-mir-15b-5p	ONECUT2	mirna-gene	Predicted	Starbase			FALSE	FALSE	1	1
hsa-mir-15b-5p	SCN8A	mirna-gene	Predicted	Starbase		Epilepsy, Nervous System Diseases, Ataxia, Intellectual Disability, Tremor, EPILEPTIC ENCEPHALOPATHY, EARLY INFANTILE, 13, Cerebellar Ataxia, Herpesviridae Infections, Neuralgia, Postherpetic, Status Epilepticus	FALSE	FALSE	1	1
hsa-mir-15b-5p	TLL1	mirna-gene	Predicted	Starbase		Atrial Septal Defect 6	FALSE	FALSE	1	1
hsa-mir-15b-5p	FAT3	mirna-gene	Predicted	Starbase			FALSE	FALSE	1	1
hsa-mir-15b-5p	FERMT2	mirna-gene	Predicted	Starbase		Urinary Bladder Neoplasms	FALSE	FALSE	1	1
hsa-mir-15b-5p	SLC25A22	mirna-gene	Predicted	Starbase		Epileptic Encephalopathy, Early Infantile, 3	FALSE	FALSE	1	1
hsa-mir-15b-5p	MYO5A	mirna-gene	Predicted	Starbase		Griscelli syndrome type 1, Peripheral Nervous System Diseases	FALSE	FALSE	1	1
hsa-mir-15b-5p	DOCK4	mirna-gene	Predicted	Starbase		Autistic Disorder	FALSE	FALSE	1	1
hsa-mir-15b-5p	WWC1	mirna-gene	Predicted	Starbase			FALSE	FALSE	1	1
hsa-mir-15b-5p	IGF2R	mirna-gene	Predicted	Starbase		Carcinoma, Hepatocellular, Alzheimer Disease, Congenital diaphragmatic hernia, Lewy Body Disease, Lung Diseases, Parkinson Disease	FALSE	FALSE	1	1
hsa-mir-196a-5p	PBX1	mirna-gene	Predicted	Starbase		Burkitt Lymphoma, Substance-Related Disorders	FALSE	FALSE	1	-1
hsa-mir-196a-5p	PUM2	mirna-gene	Predicted	Starbase			FALSE	FALSE	1	-1
hsa-mir-92a-3p	ADAMTSL3	mirna-gene	Predicted	Starbase			FALSE	FALSE	1	-1
hsa-mir-92a-3p	DUSP10	mirna-gene	Predicted	Starbase		Inflammation	FALSE	FALSE	1	-1
hsa-mir-92a-3p	ANO8	mirna-gene	Predicted	Starbase			FALSE	FALSE	1	-1
hsa-mir-92a-3p	ARID4B	mirna-gene	Experimental	mirtarbase		Carcinoma, Adenoid Cystic	FALSE	FALSE	1	-1
hsa-mir-92a-3p	BMPR2	mirna-gene	Experimental	mirtarbase		Pulmonary arterial hypertension, Hypertension, Pulmonary, Pulmonary Veno-Occlusive Disease, Hyperandrogenism	FALSE	FALSE	1	-1
hsa-mir-92a-3p	NFAT5	mirna-gene	Predicted	Starbase			FALSE	FALSE	1	-1
hsa-mir-92a-3p	HIPK3	mirna-gene	Experimental	mirtarbase			FALSE	FALSE	1	-1
hsa-mir-92a-3p	ATXN1	mirna-gene	Predicted	Starbase		Spinocerebellar Ataxias	FALSE	FALSE	1	-1
hsa-mir-92a-3p	MAN2A1	mirna-gene	Predicted	Starbase			FALSE	FALSE	1	-1
hsa-mir-92a-3p	OSBPL2	mirna-gene	Experimental	mirtarbase			FALSE	FALSE	1	-1
hsa-mir-92a-3p	DAB2IP	mirna-gene	Predicted	Starbase		Prostatic Neoplasms, Aortic Aneurysm, Abdominal, Lung Neoplasms, Myocardial Infarction, Peripheral Vascular Diseases, Pulmonary Embolism	FALSE	FALSE	1	-1
hsa-mir-92a-3p	WDFY3	mirna-gene	Predicted	Starbase			FALSE	FALSE	1	-1
hsa-mir-92a-3p	MYO5A	mirna-gene	Predicted	Starbase		Griscelli syndrome type 1, Peripheral Nervous System Diseases	FALSE	FALSE	1	-1
hsa-mir-92a-3p	DOCK5	mirna-gene	Predicted	Starbase			FALSE	FALSE	1	-1
hsa-mir-92a-3p	SH3PXD2A	mirna-gene	Predicted	Starbase			FALSE	FALSE	1	-1
hsa-mir-92a-3p	NFIX	mirna-gene	Predicted	Starbase			FALSE	FALSE	1	-1
hsa-mir-92a-3p	PDE10A	mirna-gene	Predicted	Starbase			FALSE	FALSE	1	-1
hsa-mir-92a-3p	LYST	mirna-gene	Predicted	Starbase		Chediak-Higashi Syndrome	FALSE	FALSE	1	-1
hsa-mir-92a-3p	SNX13	mirna-gene	Predicted	Starbase			FALSE	FALSE	1	-1
hsa-mir-92a-3p	SLC12A5	mirna-gene	Predicted	Starbase		Epilepsy, Seizures, Epilepsy, Temporal Lobe, Status Epilepticus, Hyperalgesia	FALSE	FALSE	1	-1

## Sheet: Table S2.3-TDBPP-exp+predic
regulator	target	category	evidence	source	regulator.association.disease	target.association.disease	is_regulator_in_disease	is_target_in_disease	target.reg	regulator.reg
ATF3	ASNS	tf-gene	Predicted	TRED	Hypospadias, Prostatic Neoplasms, Carcinoma, Non-Small-Cell Lung, Diabetes Mellitus, Type 2, Influenza, Human, Liver Neoplasms, Diabetes Mellitus, Experimental, Infarction, Middle Cerebral Artery, Nervous System Diseases, Ovarian Neoplasms, Peripheral Nervous System Diseases	Lipidoses	FALSE	FALSE	1	1
ATF3	hsa-mir-93	tf-mirna	Predicted	Chipbase	Hypospadias, Prostatic Neoplasms, Carcinoma, Non-Small-Cell Lung, Diabetes Mellitus, Type 2, Influenza, Human, Liver Neoplasms, Diabetes Mellitus, Experimental, Infarction, Middle Cerebral Artery, Nervous System Diseases, Ovarian Neoplasms, Peripheral Nervous System Diseases	Ovarian Neoplasms, Ovarian Neoplasms, Breast Neoplasms, Melanoma, Autistic Disorder, Stomach Neoplasms, Ovarian Neoplasms, Prostatic Neoplasms, Neoplasms, Glioma, Prostatic Neoplasms, Carcinoma, Hepatocellular, Urinary Bladder Neoplasms, Lung Neoplasms, Trophoblasts, Neoplasms, Adenocarcinoma, Toxoplasmosis, Laryngeal Neoplasms, Mycosis Fungoides, Colorectal Neoplasms, Colorectal Neoplasms, Burki…	FALSE	FALSE	-1	1
ATF3	ATF3	tf-gene	Experimental	Transfac	Hypospadias, Prostatic Neoplasms, Carcinoma, Non-Small-Cell Lung, Diabetes Mellitus, Type 2, Influenza, Human, Liver Neoplasms, Diabetes Mellitus, Experimental, Infarction, Middle Cerebral Artery, Nervous System Diseases, Ovarian Neoplasms, Peripheral Nervous System Diseases	Hypospadias, Prostatic Neoplasms, Carcinoma, Non-Small-Cell Lung, Diabetes Mellitus, Type 2, Influenza, Human, Liver Neoplasms, Diabetes Mellitus, Experimental, Infarction, Middle Cerebral Artery, Nervous System Diseases, Ovarian Neoplasms, Peripheral Nervous System Diseases	FALSE	FALSE	1	1
ATF3	TP53	tf-gene	Experimental	Transfac	Hypospadias, Prostatic Neoplasms, Carcinoma, Non-Small-Cell Lung, Diabetes Mellitus, Type 2, Influenza, Human, Liver Neoplasms, Diabetes Mellitus, Experimental, Infarction, Middle Cerebral Artery, Nervous System Diseases, Ovarian Neoplasms, Peripheral Nervous System Diseases	Adenocarcinoma, Carcinoma, Hepatocellular, Carcinoma, Squamous Cell, Small Cell Lung Carcinoma, Carcinoma, Breast Neoplasms, Ischemia, Li-Fraumeni Syndrome, Sarcoma family syndrome of Li and Fraumeni, Glioma, Neoplasm Metastasis, Melanoma, Stomach Neoplasms, Sarcoma, Lung Neoplasms, Colorectal Neoplasms, Leukemia, Lymphocytic, Chronic, B-Cell, Carcinoma, Non-Small-Cell Lung, Colonic Neoplasms, Ad…	FALSE	FALSE	1	1
BCL3	hsa-mir-34a	tf-mirna	Predicted	Chipbase		Breast Neoplasms, Colonic Neoplasms, Lung Neoplasms, Muscular Disorders, Atrophic, Neuroblastoma, Lymphoma, B-Cell, Leukemia, Promyelocytic, Acute, Precursor Cell Lymphoblastic Leukemia-Lymphoma, Neoplasms, Neoplasms, Uterine Cervical Neoplasms, Stomach Neoplasms, Carcinoma, Hepatocellular, Carcinoma, Hepatocellular, Carcinoma, Hepatocellular, Melanoma, Lung Neoplasms, Leukemia, Lymphocytic, Chro…	FALSE	FALSE	1	1
BCL3	hsa-mir-146a	tf-mirna	Predicted	Chipbase		Breast Neoplasms, Leukemia, Lymphocytic, Chronic, B-Cell, Lung Neoplasms, Muscular Disorders, Atrophic, Pancreatic Neoplasms, Prostatic Neoplasms, Psoriasis, Psoriasis, Thyroid Neoplasms, Thyroid Neoplasms, Thyroid Neoplasms, Thyroid Neoplasms, Thyroid Neoplasms, Lymphoma, B-Cell, Burkitt Lymphoma, Eczema, Alzheimer Disease, Autistic Disorder, Breast Neoplasms, Breast Neoplasms, Breast Neoplasms,…	FALSE	FALSE	1	1
BCL3	hsa-mir-21	tf-mirna	Predicted	Chipbase		Brain Neoplasms, Brain Neoplasms, Breast Neoplasms, Breast Neoplasms, Breast Neoplasms, Breast Neoplasms, Breast Neoplasms, Cholangiocarcinoma, Colonic Neoplasms, Dermatitis, Atopic, Focal Epithelial Hyperplasia, Glioblastoma, Glioblastoma, Glioblastoma, Glioblastoma, Glioblastoma, Glioblastoma, Heart Diseases, Heart Failure, Lung Neoplasms, Lung Neoplasms, Lymphoma, Large B-Cell, Diffuse, Muscul…	FALSE	FALSE	1	1
BCL3	hsa-mir-93	tf-mirna	Predicted	Chipbase		Ovarian Neoplasms, Ovarian Neoplasms, Breast Neoplasms, Melanoma, Autistic Disorder, Stomach Neoplasms, Ovarian Neoplasms, Prostatic Neoplasms, Neoplasms, Glioma, Prostatic Neoplasms, Carcinoma, Hepatocellular, Urinary Bladder Neoplasms, Lung Neoplasms, Trophoblasts, Neoplasms, Adenocarcinoma, Toxoplasmosis, Laryngeal Neoplasms, Mycosis Fungoides, Colorectal Neoplasms, Colorectal Neoplasms, Burki…	FALSE	FALSE	-1	1
BDP1	hsa-mir-301a	tf-mirna	Predicted	Chipbase		Salivary Gland Neoplasms, Adrenocortical Carcinoma, Lung Neoplasms, Lung Neoplasms, Breast Neoplasms, Parkinson Disease, Periodontitis, Carcinoma, Hepatocellular, Demyelinating Diseases, Prostatic Neoplasms, Stomach Neoplasms, Colorectal Neoplasms, Diabetes Mellitus	FALSE	FALSE	1	1
BDP1	hsa-mir-21	tf-mirna	Predicted	Chipbase		Brain Neoplasms, Brain Neoplasms, Breast Neoplasms, Breast Neoplasms, Breast Neoplasms, Breast Neoplasms, Breast Neoplasms, Cholangiocarcinoma, Colonic Neoplasms, Dermatitis, Atopic, Focal Epithelial Hyperplasia, Glioblastoma, Glioblastoma, Glioblastoma, Glioblastoma, Glioblastoma, Glioblastoma, Heart Diseases, Heart Failure, Lung Neoplasms, Lung Neoplasms, Lymphoma, Large B-Cell, Diffuse, Muscul…	FALSE	FALSE	1	1
FOS	CDKN1A	tf-gene	Predicted	TRED	Hypertension, Reperfusion Injury, Carcinoma, Hepatocellular, Breast Neoplasms, Endometriosis, Seizures, Amphetamine-Related Disorders, Amyotrophic lateral sclerosis 1, Anxiety Disorders, Brain Injuries, Cocaine-Related Disorders, Epilepsy, Fibrous Dysplasia of Bone, Hemorrhage, Hyperkinesis, Infarction, Middle Cerebral Artery, Lung Neoplasms, Nervous System Diseases, Neurotoxicity Syndromes, Stat…	Colonic Neoplasms, Prostatic Neoplasms, Urinary Bladder Neoplasms, Lung Neoplasms, Papilloma, Stomach Neoplasms, Esophageal Squamous Cell Carcinoma, Carcinoma, Transitional Cell, Intestinal Neoplasms, HIV Infections, Kidney Diseases, Muscular Dystrophy, Facioscapulohumeral, Reperfusion Injury	FALSE	FALSE	1	1
FOS	FOSL1	tf-gene	Experimental	Transfac	Hypertension, Reperfusion Injury, Carcinoma, Hepatocellular, Breast Neoplasms, Endometriosis, Seizures, Amphetamine-Related Disorders, Amyotrophic lateral sclerosis 1, Anxiety Disorders, Brain Injuries, Cocaine-Related Disorders, Epilepsy, Fibrous Dysplasia of Bone, Hemorrhage, Hyperkinesis, Infarction, Middle Cerebral Artery, Lung Neoplasms, Nervous System Diseases, Neurotoxicity Syndromes, Stat…		FALSE	FALSE	1	1
FOS	FOS	tf-gene	Experimental	Transfac	Hypertension, Reperfusion Injury, Carcinoma, Hepatocellular, Breast Neoplasms, Endometriosis, Seizures, Amphetamine-Related Disorders, Amyotrophic lateral sclerosis 1, Anxiety Disorders, Brain Injuries, Cocaine-Related Disorders, Epilepsy, Fibrous Dysplasia of Bone, Hemorrhage, Hyperkinesis, Infarction, Middle Cerebral Artery, Lung Neoplasms, Nervous System Diseases, Neurotoxicity Syndromes, Stat…	Hypertension, Reperfusion Injury, Carcinoma, Hepatocellular, Breast Neoplasms, Endometriosis, Seizures, Amphetamine-Related Disorders, Amyotrophic lateral sclerosis 1, Anxiety Disorders, Brain Injuries, Cocaine-Related Disorders, Epilepsy, Fibrous Dysplasia of Bone, Hemorrhage, Hyperkinesis, Infarction, Middle Cerebral Artery, Lung Neoplasms, Nervous System Diseases, Neurotoxicity Syndromes, Stat…	FALSE	FALSE	1	1
FOS	TP53	tf-gene	Experimental	Transfac	Hypertension, Reperfusion Injury, Carcinoma, Hepatocellular, Breast Neoplasms, Endometriosis, Seizures, Amphetamine-Related Disorders, Amyotrophic lateral sclerosis 1, Anxiety Disorders, Brain Injuries, Cocaine-Related Disorders, Epilepsy, Fibrous Dysplasia of Bone, Hemorrhage, Hyperkinesis, Infarction, Middle Cerebral Artery, Lung Neoplasms, Nervous System Diseases, Neurotoxicity Syndromes, Stat…	Adenocarcinoma, Carcinoma, Hepatocellular, Carcinoma, Squamous Cell, Small Cell Lung Carcinoma, Carcinoma, Breast Neoplasms, Ischemia, Li-Fraumeni Syndrome, Sarcoma family syndrome of Li and Fraumeni, Glioma, Neoplasm Metastasis, Melanoma, Stomach Neoplasms, Sarcoma, Lung Neoplasms, Colorectal Neoplasms, Leukemia, Lymphocytic, Chronic, B-Cell, Carcinoma, Non-Small-Cell Lung, Colonic Neoplasms, Ad…	FALSE	FALSE	1	1
FOS	MMP13	tf-gene	Predicted	TRED	Hypertension, Reperfusion Injury, Carcinoma, Hepatocellular, Breast Neoplasms, Endometriosis, Seizures, Amphetamine-Related Disorders, Amyotrophic lateral sclerosis 1, Anxiety Disorders, Brain Injuries, Cocaine-Related Disorders, Epilepsy, Fibrous Dysplasia of Bone, Hemorrhage, Hyperkinesis, Infarction, Middle Cerebral Artery, Lung Neoplasms, Nervous System Diseases, Neurotoxicity Syndromes, Stat…	Spondyloepimetaphyseal Dysplasia, Missouri Type, Liver Cirrhosis, Experimental, Craniofacial Abnormalities, Prostatic Neoplasms	FALSE	FALSE	1	1
FOS	PTGDS	tf-gene	Predicted	TRED	Hypertension, Reperfusion Injury, Carcinoma, Hepatocellular, Breast Neoplasms, Endometriosis, Seizures, Amphetamine-Related Disorders, Amyotrophic lateral sclerosis 1, Anxiety Disorders, Brain Injuries, Cocaine-Related Disorders, Epilepsy, Fibrous Dysplasia of Bone, Hemorrhage, Hyperkinesis, Infarction, Middle Cerebral Artery, Lung Neoplasms, Nervous System Diseases, Neurotoxicity Syndromes, Stat…		FALSE	FALSE	-1	1
FOSL1	FOSL1	tf-gene	Experimental	Transfac			FALSE	FALSE	1	1
FOSL2	hsa-mir-125a	tf-mirna	Predicted	Chipbase		Breast Neoplasms, Breast Neoplasms, Carcinoma, Hepatocellular, Carcinoma, Hepatocellular, Heart Failure, Lung Neoplasms, Muscular Disorders, Atrophic, Ovarian Neoplasms, Endometriosis, Leukemia, Medulloblastoma, Retinal Degeneration, Ovarian Neoplasms, Breast Neoplasms, Hepatoblastoma, Atrophy, Myelodysplastic Syndromes, Carcinoma, Non-Small-Cell Lung, Carcinoma, Non-Small-Cell Lung, Carcinoma, S…	FALSE	FALSE	-1	1
FOSL2	hsa-mir-489	tf-mirna	Predicted	Chipbase		Carcinoma, Squamous Cell, Neoplasms, Squamous Cell, Muscular Dystrophies, Carcinoma, Hepatocellular	FALSE	FALSE	-1	1
FOSL2	hsa-let-7g	tf-mirna	Predicted	Chipbase		Colonic Neoplasms, Lung Neoplasms, Lung Neoplasms, Lung Neoplasms, Lung Neoplasms, Lung Neoplasms, Lung Neoplasms, Lung Neoplasms, Neoplasms, Neoplasms, Neoplasms, Schizophrenia, Neoplasms, Digestive System Neoplasms, Head and Neck Neoplasms, Neoplasms, Sarcoma, Kaposi, Lung Neoplasms, Melanoma, Pancreatic Neoplasms, Pituitary Neoplasms, Lymphoma, Primary Effusion, Neoplasms, Lung Neoplasms, Carc…	FALSE	FALSE	-1	1
FOSL2	hsa-mir-93	tf-mirna	Predicted	Chipbase		Ovarian Neoplasms, Ovarian Neoplasms, Breast Neoplasms, Melanoma, Autistic Disorder, Stomach Neoplasms, Ovarian Neoplasms, Prostatic Neoplasms, Neoplasms, Glioma, Prostatic Neoplasms, Carcinoma, Hepatocellular, Urinary Bladder Neoplasms, Lung Neoplasms, Trophoblasts, Neoplasms, Adenocarcinoma, Toxoplasmosis, Laryngeal Neoplasms, Mycosis Fungoides, Colorectal Neoplasms, Colorectal Neoplasms, Burki…	FALSE	FALSE	-1	1
FOSL2	hsa-mir-146b	tf-mirna	Predicted	Chipbase		Breast Neoplasms, Leukemia, Lymphocytic, Chronic, B-Cell, Lung Neoplasms, Muscular Disorders, Atrophic, Muscular Disorders, Atrophic, Pancreatic Neoplasms, Prostatic Neoplasms, Psoriasis, Thyroid Neoplasms, Thyroid Neoplasms, Thyroid Neoplasms, Thyroid Neoplasms, Thyroid Neoplasms, Autistic Disorder, Autistic Disorder, Breast Neoplasms, Breast Neoplasms, Glioma, Head and Neck Neoplasms, Thyroid N…	FALSE	FALSE	1	1
FOSL2	hsa-mir-130b	tf-mirna	Predicted	Chipbase		Heart Failure, Head and Neck Neoplasms, Lupus Vulgaris, Prostatic Neoplasms, Stomach Neoplasms, Leukemia, Myeloid, Multiple Myeloma, Tuberculosis, Pulmonary, Pre-Eclampsia, Carcinoma, Hepatocellular, Head and Neck Neoplasms, Carcinoma, Renal Cell, Endometrial Neoplasms, Esophageal Neoplasms	FALSE	FALSE	1	1
FOSL2	hsa-mir-375	tf-mirna	Predicted	Chipbase		Diabetes Mellitus, Diabetes Mellitus, Salivary Gland Neoplasms, Adrenocortical Carcinoma, Liver Neoplasms, Carcinoma, Carcinoma, Carcinoma, Squamous Cell, Stomach Neoplasms, Laryngeal Neoplasms, Gastrointestinal Neoplasms, Stomach Neoplasms, Endometriosis, Adrenocortical Carcinoma, Esophageal Neoplasms, Esophageal Neoplasms, Prostatic Neoplasms, Carcinoma, Squamous Cell, Melanoma, Carcinoma, Squa…	FALSE	FALSE	-1	1
FOSL2	FOSL1	tf-gene	Experimental	Transfac			FALSE	FALSE	1	1
FOSL2	CSH1	tf-gene	Experimental	PMID20584335		Silver-Russell Syndrome	FALSE	FALSE	-1	1
FOSL2	hsa-mir-21	tf-mirna	Predicted	Chipbase		Brain Neoplasms, Brain Neoplasms, Breast Neoplasms, Breast Neoplasms, Breast Neoplasms, Breast Neoplasms, Breast Neoplasms, Cholangiocarcinoma, Colonic Neoplasms, Dermatitis, Atopic, Focal Epithelial Hyperplasia, Glioblastoma, Glioblastoma, Glioblastoma, Glioblastoma, Glioblastoma, Glioblastoma, Heart Diseases, Heart Failure, Lung Neoplasms, Lung Neoplasms, Lymphoma, Large B-Cell, Diffuse, Muscul…	FALSE	FALSE	1	1
HLF	ANXA2	tf-gene	Predicted	TRED		Leukemia, Myeloid, Acute, Carcinoma, Squamous Cell, Osteoporosis, Liver Neoplasms, Mammary Neoplasms, Animal, Mouth Neoplasms, Neoplasm Invasiveness, Weight Gain	FALSE	FALSE	1	1
IRF3	ISG15	tf-gene	Experimental	Transfac		Influenza, Human	FALSE	FALSE	1	1
IRF9	ISG15	tf-gene	Experimental	Transfac		Influenza, Human	FALSE	FALSE	1	1
JUNB	CDKN1A	tf-gene	Predicted	TRED	Myocardial Ischemia, Infarction, Middle Cerebral Artery, Lung Neoplasms, Status Epilepticus	Colonic Neoplasms, Prostatic Neoplasms, Urinary Bladder Neoplasms, Lung Neoplasms, Papilloma, Stomach Neoplasms, Esophageal Squamous Cell Carcinoma, Carcinoma, Transitional Cell, Intestinal Neoplasms, HIV Infections, Kidney Diseases, Muscular Dystrophy, Facioscapulohumeral, Reperfusion Injury	FALSE	FALSE	1	1
JUNB	FOSL1	tf-gene	Experimental	Transfac	Myocardial Ischemia, Infarction, Middle Cerebral Artery, Lung Neoplasms, Status Epilepticus		FALSE	FALSE	1	1
NFIC	TP53	tf-gene	Experimental	Transfac	Prostatic Neoplasms	Adenocarcinoma, Carcinoma, Hepatocellular, Carcinoma, Squamous Cell, Small Cell Lung Carcinoma, Carcinoma, Breast Neoplasms, Ischemia, Li-Fraumeni Syndrome, Sarcoma family syndrome of Li and Fraumeni, Glioma, Neoplasm Metastasis, Melanoma, Stomach Neoplasms, Sarcoma, Lung Neoplasms, Colorectal Neoplasms, Leukemia, Lymphocytic, Chronic, B-Cell, Carcinoma, Non-Small-Cell Lung, Colonic Neoplasms, Ad…	FALSE	FALSE	1	1
NFIC	FN1	tf-gene	Experimental	Transfac	Prostatic Neoplasms	Glomerulopathy with fibronectin deposits, Carcinoma, Diabetes Mellitus, Crohn Disease, Glioblastoma, Hypertension, Aortic Valve Insufficiency, Glomerulosclerosis, Focal Segmental, Abortion, Spontaneous, Hypertrophy, Left Ventricular, Mammary Neoplasms, Animal, Mammary Neoplasms, Experimental	FALSE	FALSE	1	1
NFIC	IRF3	tf-gene	Predicted	TRED	Prostatic Neoplasms		FALSE	FALSE	1	1
NFIC	GFAP	tf-gene	Experimental	Transfac	Prostatic Neoplasms	Alexander Disease, Amyotrophic Lateral Sclerosis, Gliosis, Nervous System Diseases, Neuromyelitis Optica, Epilepsy, Parkinson Disease, Amyotrophic lateral sclerosis 1, Ceroid lipofuscinosis, neuronal 1, infantile, Lewy Body Disease, Peripheral Nervous System Diseases, Spina Bifida Cystica	FALSE	FALSE	-1	1
NFIC	CDKN1A	tf-gene	Experimental	PMID20584335	Prostatic Neoplasms	Colonic Neoplasms, Prostatic Neoplasms, Urinary Bladder Neoplasms, Lung Neoplasms, Papilloma, Stomach Neoplasms, Esophageal Squamous Cell Carcinoma, Carcinoma, Transitional Cell, Intestinal Neoplasms, HIV Infections, Kidney Diseases, Muscular Dystrophy, Facioscapulohumeral, Reperfusion Injury	FALSE	FALSE	1	1
NFIC	FN1	tf-gene	Predicted	TRED	Prostatic Neoplasms	Glomerulopathy with fibronectin deposits, Carcinoma, Diabetes Mellitus, Crohn Disease, Glioblastoma, Hypertension, Aortic Valve Insufficiency, Glomerulosclerosis, Focal Segmental, Abortion, Spontaneous, Hypertrophy, Left Ventricular, Mammary Neoplasms, Animal, Mammary Neoplasms, Experimental	FALSE	FALSE	1	1
NFIC	AGXT	tf-gene	Predicted	TRED	Prostatic Neoplasms	Primary hyperoxaluria type 1	FALSE	FALSE	-1	1
NFIC	MATN1	tf-gene	Predicted	TRED	Prostatic Neoplasms		FALSE	FALSE	-1	1
NFIC	FOS	tf-gene	Predicted	TRED	Prostatic Neoplasms	Hypertension, Reperfusion Injury, Carcinoma, Hepatocellular, Breast Neoplasms, Endometriosis, Seizures, Amphetamine-Related Disorders, Amyotrophic lateral sclerosis 1, Anxiety Disorders, Brain Injuries, Cocaine-Related Disorders, Epilepsy, Fibrous Dysplasia of Bone, Hemorrhage, Hyperkinesis, Infarction, Middle Cerebral Artery, Lung Neoplasms, Nervous System Diseases, Neurotoxicity Syndromes, Stat…	FALSE	FALSE	1	1
NFIC	GFAP	tf-gene	Predicted	TRED	Prostatic Neoplasms	Alexander Disease, Amyotrophic Lateral Sclerosis, Gliosis, Nervous System Diseases, Neuromyelitis Optica, Epilepsy, Parkinson Disease, Amyotrophic lateral sclerosis 1, Ceroid lipofuscinosis, neuronal 1, infantile, Lewy Body Disease, Peripheral Nervous System Diseases, Spina Bifida Cystica	FALSE	FALSE	-1	1
NFIC	SERPINE1	tf-gene	Experimental	PMID20584335	Prostatic Neoplasms	Diabetic Nephropathies, Pre-Eclampsia, Thrombosis, Atherosclerosis, Kidney Failure, Chronic, Stomach Neoplasms, Fatty Liver, Prostatic Neoplasms, Liver Neoplasms, Autistic Disorder, Behcet Syndrome, Glomerulosclerosis, Focal Segmental, Nephrotic Syndrome, Cholestasis, Diabetes Mellitus, Experimental, Nervous System Diseases, Plasminogen Activator Inhibitor-1 Deficiency	FALSE	FALSE	1	1
NFIC	AGT	tf-gene	Predicted	TRED	Prostatic Neoplasms	Allanson Pantzar McLeod syndrome, Hypertension, Myocardial Infarction, Glomerulosclerosis, Focal Segmental, Fibrosis, Cardiomegaly, Hypertension, Essential, Pre-Eclampsia, Atherosclerosis, Cardiovascular Diseases, Kidney Diseases, Hypertrophy, Left Ventricular, Heart Failure, Glomerulonephritis, IGA, Diabetic Nephropathies, Myocardial Ischemia, Aortic Aneurysm, Abdominal, Cardiomyopathies, Diabet…	FALSE	FALSE	-1	1
NFIC	TP53	tf-gene	Predicted	TRED	Prostatic Neoplasms	Adenocarcinoma, Carcinoma, Hepatocellular, Carcinoma, Squamous Cell, Small Cell Lung Carcinoma, Carcinoma, Breast Neoplasms, Ischemia, Li-Fraumeni Syndrome, Sarcoma family syndrome of Li and Fraumeni, Glioma, Neoplasm Metastasis, Melanoma, Stomach Neoplasms, Sarcoma, Lung Neoplasms, Colorectal Neoplasms, Leukemia, Lymphocytic, Chronic, B-Cell, Carcinoma, Non-Small-Cell Lung, Colonic Neoplasms, Ad…	FALSE	FALSE	1	1
NR1H4	hsa-mir-34a	tf-mirna	Experimental	Transmir	Liver Diseases, Cholestasis, Liver Neoplasms, Crohn Disease, Extravasation of Diagnostic and Therapeutic Materials, Intestinal Neoplasms	Breast Neoplasms, Colonic Neoplasms, Lung Neoplasms, Muscular Disorders, Atrophic, Neuroblastoma, Lymphoma, B-Cell, Leukemia, Promyelocytic, Acute, Precursor Cell Lymphoblastic Leukemia-Lymphoma, Neoplasms, Neoplasms, Uterine Cervical Neoplasms, Stomach Neoplasms, Carcinoma, Hepatocellular, Carcinoma, Hepatocellular, Carcinoma, Hepatocellular, Melanoma, Lung Neoplasms, Leukemia, Lymphocytic, Chro…	FALSE	FALSE	1	-1
NR1H4	PPARA	tf-gene	Experimental	Transfac	Liver Diseases, Cholestasis, Liver Neoplasms, Crohn Disease, Extravasation of Diagnostic and Therapeutic Materials, Intestinal Neoplasms	Hypertension, Reperfusion Injury, Diabetes Mellitus, Type 2, Obesity, Dyslipidemias, Fatty Liver, Hyperlipidemias, Insulin Resistance, Dermatitis, Atopic, Carcinoma, Neoplasms, Inflammation, Kidney Failure, Chronic, Liver Neoplasms, Encephalomyelitis, Autoimmune, Experimental, Hepatomegaly, Hypoglycemia, Kidney Diseases, Kidney Tubular Necrosis, Acute, Muscular Diseases, Abdominal obesity metabol…	FALSE	FALSE	1	-1
PAX5	TP53	tf-gene	Experimental	Transfac		Adenocarcinoma, Carcinoma, Hepatocellular, Carcinoma, Squamous Cell, Small Cell Lung Carcinoma, Carcinoma, Breast Neoplasms, Ischemia, Li-Fraumeni Syndrome, Sarcoma family syndrome of Li and Fraumeni, Glioma, Neoplasm Metastasis, Melanoma, Stomach Neoplasms, Sarcoma, Lung Neoplasms, Colorectal Neoplasms, Leukemia, Lymphocytic, Chronic, B-Cell, Carcinoma, Non-Small-Cell Lung, Colonic Neoplasms, Ad…	FALSE	FALSE	1	1
PAX5	KCNH8	tf-gene	Predicted	TRED			FALSE	FALSE	-1	1
PPARA	GADD45A	tf-gene	Predicted	TRED	Hypertension, Reperfusion Injury, Diabetes Mellitus, Type 2, Obesity, Dyslipidemias, Fatty Liver, Hyperlipidemias, Insulin Resistance, Dermatitis, Atopic, Carcinoma, Neoplasms, Inflammation, Kidney Failure, Chronic, Liver Neoplasms, Encephalomyelitis, Autoimmune, Experimental, Hepatomegaly, Hypoglycemia, Kidney Diseases, Kidney Tubular Necrosis, Acute, Muscular Diseases, Abdominal obesity metabol…	Pancreatic Neoplasms, Ovarian Neoplasms, Prostatic Neoplasms, Chloracne, Drug-Induced Liver Injury, HIV Infections, Stomach Neoplasms	FALSE	FALSE	1	1
PPARA	FABP1	tf-gene	Predicted	TRED	Hypertension, Reperfusion Injury, Diabetes Mellitus, Type 2, Obesity, Dyslipidemias, Fatty Liver, Hyperlipidemias, Insulin Resistance, Dermatitis, Atopic, Carcinoma, Neoplasms, Inflammation, Kidney Failure, Chronic, Liver Neoplasms, Encephalomyelitis, Autoimmune, Experimental, Hepatomegaly, Hypoglycemia, Kidney Diseases, Kidney Tubular Necrosis, Acute, Muscular Diseases, Abdominal obesity metabol…	Kidney Failure, Chronic, Kidney Tubular Necrosis, Acute, Lipidoses	FALSE	FALSE	1	1
PPARA	SEMA6B	tf-gene	Experimental	PMID20584335	Hypertension, Reperfusion Injury, Diabetes Mellitus, Type 2, Obesity, Dyslipidemias, Fatty Liver, Hyperlipidemias, Insulin Resistance, Dermatitis, Atopic, Carcinoma, Neoplasms, Inflammation, Kidney Failure, Chronic, Liver Neoplasms, Encephalomyelitis, Autoimmune, Experimental, Hepatomegaly, Hypoglycemia, Kidney Diseases, Kidney Tubular Necrosis, Acute, Muscular Diseases, Abdominal obesity metabol…		FALSE	FALSE	1	1
PPARA	MMP9	tf-gene	Predicted	TRED	Hypertension, Reperfusion Injury, Diabetes Mellitus, Type 2, Obesity, Dyslipidemias, Fatty Liver, Hyperlipidemias, Insulin Resistance, Dermatitis, Atopic, Carcinoma, Neoplasms, Inflammation, Kidney Failure, Chronic, Liver Neoplasms, Encephalomyelitis, Autoimmune, Experimental, Hepatomegaly, Hypoglycemia, Kidney Diseases, Kidney Tubular Necrosis, Acute, Muscular Diseases, Abdominal obesity metabol…	Asthma, Myocardial Infarction, Colonic Neoplasms, Carcinoma, Non-Small-Cell Lung, Neoplasm Metastasis, Brain Ischemia, Stomach Ulcer, Brain Injuries, Pulmonary Fibrosis, Aortic Aneurysm, Thoracic, Brain Edema, Diabetes Mellitus, Experimental, Mammary Neoplasms, Experimental, Breast Neoplasms, Aortic Aneurysm, Abdominal, Pulmonary Disease, Chronic Obstructive, Carcinoma, Squamous Cell, Carcinoma, …	FALSE	FALSE	1	1
PPARA	LIPE	tf-gene	Predicted	TRED	Hypertension, Reperfusion Injury, Diabetes Mellitus, Type 2, Obesity, Dyslipidemias, Fatty Liver, Hyperlipidemias, Insulin Resistance, Dermatitis, Atopic, Carcinoma, Neoplasms, Inflammation, Kidney Failure, Chronic, Liver Neoplasms, Encephalomyelitis, Autoimmune, Experimental, Hepatomegaly, Hypoglycemia, Kidney Diseases, Kidney Tubular Necrosis, Acute, Muscular Diseases, Abdominal obesity metabol…		FALSE	FALSE	1	1
RARG	RARG	tf-gene	Experimental	Transfac	Cleft Palate, Musculoskeletal Abnormalities	Cleft Palate, Musculoskeletal Abnormalities	FALSE	FALSE	1	1
RARG	SLC5A5	tf-gene	Predicted	TRED	Cleft Palate, Musculoskeletal Abnormalities	Thyroid Dyshormonogenesis 1, Thyroid Neoplasms, Neoplasms, Breast Neoplasms, Carcinoma, Hepatocellular, Cholangiocarcinoma, Glioma, Prostatic Neoplasms, Melanoma, Ovarian Neoplasms, Kidney Neoplasms	FALSE	FALSE	1	1
RARG	TG	tf-gene	Predicted	TRED	Cleft Palate, Musculoskeletal Abnormalities	Thyroid Dyshormonogenesis 3, Goiter, Thyroiditis, Autoimmune	FALSE	FALSE	1	1
RXRA	SEMA6B	tf-gene	Experimental	PMID20584335	Prostatic Neoplasms, Amyotrophic lateral sclerosis 1, Sciatic Neuropathy		FALSE	FALSE	1	1
RXRA	hsa-mir-375	tf-mirna	Predicted	Chipbase	Prostatic Neoplasms, Amyotrophic lateral sclerosis 1, Sciatic Neuropathy	Diabetes Mellitus, Diabetes Mellitus, Salivary Gland Neoplasms, Adrenocortical Carcinoma, Liver Neoplasms, Carcinoma, Carcinoma, Carcinoma, Squamous Cell, Stomach Neoplasms, Laryngeal Neoplasms, Gastrointestinal Neoplasms, Stomach Neoplasms, Endometriosis, Adrenocortical Carcinoma, Esophageal Neoplasms, Esophageal Neoplasms, Prostatic Neoplasms, Carcinoma, Squamous Cell, Melanoma, Carcinoma, Squa…	FALSE	FALSE	-1	1
RXRA	CDKN1A	tf-gene	Experimental	Transfac	Prostatic Neoplasms, Amyotrophic lateral sclerosis 1, Sciatic Neuropathy	Colonic Neoplasms, Prostatic Neoplasms, Urinary Bladder Neoplasms, Lung Neoplasms, Papilloma, Stomach Neoplasms, Esophageal Squamous Cell Carcinoma, Carcinoma, Transitional Cell, Intestinal Neoplasms, HIV Infections, Kidney Diseases, Muscular Dystrophy, Facioscapulohumeral, Reperfusion Injury	FALSE	FALSE	1	1
RXRA	IGFBP1	tf-gene	Experimental	PMID20584335	Prostatic Neoplasms, Amyotrophic lateral sclerosis 1, Sciatic Neuropathy	Endometriosis, Abortion, Spontaneous, Colonic Neoplasms, Drug Toxicity, Liver Cirrhosis, Biliary, Liver Cirrhosis, Experimental, Precancerous Conditions	FALSE	FALSE	1	1
RXRA	RARG	tf-gene	Experimental	Transfac	Prostatic Neoplasms, Amyotrophic lateral sclerosis 1, Sciatic Neuropathy	Cleft Palate, Musculoskeletal Abnormalities	FALSE	FALSE	1	1
RXRA	hsa-mir-21	tf-mirna	Predicted	Chipbase	Prostatic Neoplasms, Amyotrophic lateral sclerosis 1, Sciatic Neuropathy	Brain Neoplasms, Brain Neoplasms, Breast Neoplasms, Breast Neoplasms, Breast Neoplasms, Breast Neoplasms, Breast Neoplasms, Cholangiocarcinoma, Colonic Neoplasms, Dermatitis, Atopic, Focal Epithelial Hyperplasia, Glioblastoma, Glioblastoma, Glioblastoma, Glioblastoma, Glioblastoma, Glioblastoma, Heart Diseases, Heart Failure, Lung Neoplasms, Lung Neoplasms, Lymphoma, Large B-Cell, Diffuse, Muscul…	FALSE	FALSE	1	1
RXRA	hsa-mir-93	tf-mirna	Predicted	Chipbase	Prostatic Neoplasms, Amyotrophic lateral sclerosis 1, Sciatic Neuropathy	Ovarian Neoplasms, Ovarian Neoplasms, Breast Neoplasms, Melanoma, Autistic Disorder, Stomach Neoplasms, Ovarian Neoplasms, Prostatic Neoplasms, Neoplasms, Glioma, Prostatic Neoplasms, Carcinoma, Hepatocellular, Urinary Bladder Neoplasms, Lung Neoplasms, Trophoblasts, Neoplasms, Adenocarcinoma, Toxoplasmosis, Laryngeal Neoplasms, Mycosis Fungoides, Colorectal Neoplasms, Colorectal Neoplasms, Burki…	FALSE	FALSE	-1	1
RXRA	hsa-mir-146a	tf-mirna	Predicted	Chipbase	Prostatic Neoplasms, Amyotrophic lateral sclerosis 1, Sciatic Neuropathy	Breast Neoplasms, Leukemia, Lymphocytic, Chronic, B-Cell, Lung Neoplasms, Muscular Disorders, Atrophic, Pancreatic Neoplasms, Prostatic Neoplasms, Psoriasis, Psoriasis, Thyroid Neoplasms, Thyroid Neoplasms, Thyroid Neoplasms, Thyroid Neoplasms, Thyroid Neoplasms, Lymphoma, B-Cell, Burkitt Lymphoma, Eczema, Alzheimer Disease, Autistic Disorder, Breast Neoplasms, Breast Neoplasms, Breast Neoplasms,…	FALSE	FALSE	1	1
RXRA	hsa-mir-146b	tf-mirna	Predicted	Chipbase	Prostatic Neoplasms, Amyotrophic lateral sclerosis 1, Sciatic Neuropathy	Breast Neoplasms, Leukemia, Lymphocytic, Chronic, B-Cell, Lung Neoplasms, Muscular Disorders, Atrophic, Muscular Disorders, Atrophic, Pancreatic Neoplasms, Prostatic Neoplasms, Psoriasis, Thyroid Neoplasms, Thyroid Neoplasms, Thyroid Neoplasms, Thyroid Neoplasms, Thyroid Neoplasms, Autistic Disorder, Autistic Disorder, Breast Neoplasms, Breast Neoplasms, Glioma, Head and Neck Neoplasms, Thyroid N…	FALSE	FALSE	1	1
RXRA	hsa-mir-196b	tf-mirna	Predicted	Chipbase	Prostatic Neoplasms, Amyotrophic lateral sclerosis 1, Sciatic Neuropathy	Neoplasms, Endometriosis, Hepatitis C, Leukemia, Neutropenia, Leukemia, Myeloid, Acute, Leukemia, Myeloid, Acute, Leukemia, Lymphocytic, Chronic, B-Cell, Adenoviridae Infections, Prostatic Neoplasms, Crohn Disease, Urinary Bladder Neoplasms, Hepatitis C, Leukemia, Myeloid, Acute, Glioblastoma, Precursor Cell Lymphoblastic Leukemia-Lymphoma, Pancreatic Neoplasms, Stomach Neoplasms, Leukemia, Gliob…	FALSE	FALSE	-1	1
STAT5A	PAX5	tf-gene	Predicted	TRED	Mammary Neoplasms, Experimental, Breast Neoplasms, Adenocarcinoma, Carcinoma, Carcinoma, Ductal, Carcinoma, Intraductal, Noninfiltrating, Carcinoma, Lobular, Lung Neoplasms, Mammary Neoplasms, Animal, Myocardial Ischemia, Precancerous Conditions		FALSE	FALSE	1	1
STAT5A	IL6ST	tf-gene	Predicted	TRED	Mammary Neoplasms, Experimental, Breast Neoplasms, Adenocarcinoma, Carcinoma, Carcinoma, Ductal, Carcinoma, Intraductal, Noninfiltrating, Carcinoma, Lobular, Lung Neoplasms, Mammary Neoplasms, Animal, Myocardial Ischemia, Precancerous Conditions	Arthritis, Rheumatoid, Pneumonia, Carcinoma, Colorectal Neoplasms, Hypersensitivity, Mammary Neoplasms, Animal, Mammary Neoplasms, Experimental, Myocardial Ischemia, Ovarian Neoplasms	FALSE	FALSE	1	1
TFE3	SERPINE1	tf-gene	Experimental	Transfac	Carcinoma, Renal Cell	Diabetic Nephropathies, Pre-Eclampsia, Thrombosis, Atherosclerosis, Kidney Failure, Chronic, Stomach Neoplasms, Fatty Liver, Prostatic Neoplasms, Liver Neoplasms, Autistic Disorder, Behcet Syndrome, Glomerulosclerosis, Focal Segmental, Nephrotic Syndrome, Cholestasis, Diabetes Mellitus, Experimental, Nervous System Diseases, Plasminogen Activator Inhibitor-1 Deficiency	FALSE	FALSE	1	1
TP53	DGKG	tf-gene	Predicted	TRED	Adenocarcinoma, Carcinoma, Hepatocellular, Carcinoma, Squamous Cell, Small Cell Lung Carcinoma, Carcinoma, Breast Neoplasms, Ischemia, Li-Fraumeni Syndrome, Sarcoma family syndrome of Li and Fraumeni, Glioma, Neoplasm Metastasis, Melanoma, Stomach Neoplasms, Sarcoma, Lung Neoplasms, Colorectal Neoplasms, Leukemia, Lymphocytic, Chronic, B-Cell, Carcinoma, Non-Small-Cell Lung, Colonic Neoplasms, Ad…		FALSE	FALSE	1	1
TP53	GADD45A	tf-gene	Experimental	Transfac	Adenocarcinoma, Carcinoma, Hepatocellular, Carcinoma, Squamous Cell, Small Cell Lung Carcinoma, Carcinoma, Breast Neoplasms, Ischemia, Li-Fraumeni Syndrome, Sarcoma family syndrome of Li and Fraumeni, Glioma, Neoplasm Metastasis, Melanoma, Stomach Neoplasms, Sarcoma, Lung Neoplasms, Colorectal Neoplasms, Leukemia, Lymphocytic, Chronic, B-Cell, Carcinoma, Non-Small-Cell Lung, Colonic Neoplasms, Ad…	Pancreatic Neoplasms, Ovarian Neoplasms, Prostatic Neoplasms, Chloracne, Drug-Induced Liver Injury, HIV Infections, Stomach Neoplasms	FALSE	FALSE	1	1
TP53	NFIC	tf-gene	Predicted	TRED	Adenocarcinoma, Carcinoma, Hepatocellular, Carcinoma, Squamous Cell, Small Cell Lung Carcinoma, Carcinoma, Breast Neoplasms, Ischemia, Li-Fraumeni Syndrome, Sarcoma family syndrome of Li and Fraumeni, Glioma, Neoplasm Metastasis, Melanoma, Stomach Neoplasms, Sarcoma, Lung Neoplasms, Colorectal Neoplasms, Leukemia, Lymphocytic, Chronic, B-Cell, Carcinoma, Non-Small-Cell Lung, Colonic Neoplasms, Ad…	Prostatic Neoplasms	FALSE	FALSE	1	1
TP53	BDKRB1	tf-gene	Predicted	TRED	Adenocarcinoma, Carcinoma, Hepatocellular, Carcinoma, Squamous Cell, Small Cell Lung Carcinoma, Carcinoma, Breast Neoplasms, Ischemia, Li-Fraumeni Syndrome, Sarcoma family syndrome of Li and Fraumeni, Glioma, Neoplasm Metastasis, Melanoma, Stomach Neoplasms, Sarcoma, Lung Neoplasms, Colorectal Neoplasms, Leukemia, Lymphocytic, Chronic, B-Cell, Carcinoma, Non-Small-Cell Lung, Colonic Neoplasms, Ad…	Diabetes Mellitus, Experimental, Hyperalgesia, Pain, Inflammation, Epilepsy, Temporal Lobe, Splenomegaly, Vascular System Injuries	FALSE	FALSE	-1	1
TP53	MDM2	tf-gene	Experimental	Transfac	Adenocarcinoma, Carcinoma, Hepatocellular, Carcinoma, Squamous Cell, Small Cell Lung Carcinoma, Carcinoma, Breast Neoplasms, Ischemia, Li-Fraumeni Syndrome, Sarcoma family syndrome of Li and Fraumeni, Glioma, Neoplasm Metastasis, Melanoma, Stomach Neoplasms, Sarcoma, Lung Neoplasms, Colorectal Neoplasms, Leukemia, Lymphocytic, Chronic, B-Cell, Carcinoma, Non-Small-Cell Lung, Colonic Neoplasms, Ad…	Carcinoma, Non-Small-Cell Lung, Melanoma, Prostatic Neoplasms, Precancerous Conditions, Cell Transformation, Neoplastic, HIV Infections, Peripheral Nervous System Diseases	FALSE	FALSE	1	1
TP53	CCNG1	tf-gene	Predicted	TRED	Adenocarcinoma, Carcinoma, Hepatocellular, Carcinoma, Squamous Cell, Small Cell Lung Carcinoma, Carcinoma, Breast Neoplasms, Ischemia, Li-Fraumeni Syndrome, Sarcoma family syndrome of Li and Fraumeni, Glioma, Neoplasm Metastasis, Melanoma, Stomach Neoplasms, Sarcoma, Lung Neoplasms, Colorectal Neoplasms, Leukemia, Lymphocytic, Chronic, B-Cell, Carcinoma, Non-Small-Cell Lung, Colonic Neoplasms, Ad…	Lung Neoplasms	FALSE	FALSE	1	1
TP53	CDKN1A	tf-gene	Experimental	Transfac	Adenocarcinoma, Carcinoma, Hepatocellular, Carcinoma, Squamous Cell, Small Cell Lung Carcinoma, Carcinoma, Breast Neoplasms, Ischemia, Li-Fraumeni Syndrome, Sarcoma family syndrome of Li and Fraumeni, Glioma, Neoplasm Metastasis, Melanoma, Stomach Neoplasms, Sarcoma, Lung Neoplasms, Colorectal Neoplasms, Leukemia, Lymphocytic, Chronic, B-Cell, Carcinoma, Non-Small-Cell Lung, Colonic Neoplasms, Ad…	Colonic Neoplasms, Prostatic Neoplasms, Urinary Bladder Neoplasms, Lung Neoplasms, Papilloma, Stomach Neoplasms, Esophageal Squamous Cell Carcinoma, Carcinoma, Transitional Cell, Intestinal Neoplasms, HIV Infections, Kidney Diseases, Muscular Dystrophy, Facioscapulohumeral, Reperfusion Injury	FALSE	FALSE	1	1
TP53	ATF3	tf-gene	Experimental	Transfac	Adenocarcinoma, Carcinoma, Hepatocellular, Carcinoma, Squamous Cell, Small Cell Lung Carcinoma, Carcinoma, Breast Neoplasms, Ischemia, Li-Fraumeni Syndrome, Sarcoma family syndrome of Li and Fraumeni, Glioma, Neoplasm Metastasis, Melanoma, Stomach Neoplasms, Sarcoma, Lung Neoplasms, Colorectal Neoplasms, Leukemia, Lymphocytic, Chronic, B-Cell, Carcinoma, Non-Small-Cell Lung, Colonic Neoplasms, Ad…	Hypospadias, Prostatic Neoplasms, Carcinoma, Non-Small-Cell Lung, Diabetes Mellitus, Type 2, Influenza, Human, Liver Neoplasms, Diabetes Mellitus, Experimental, Infarction, Middle Cerebral Artery, Nervous System Diseases, Ovarian Neoplasms, Peripheral Nervous System Diseases	FALSE	FALSE	1	1
TP53	MAP4	tf-gene	Predicted	TRED	Adenocarcinoma, Carcinoma, Hepatocellular, Carcinoma, Squamous Cell, Small Cell Lung Carcinoma, Carcinoma, Breast Neoplasms, Ischemia, Li-Fraumeni Syndrome, Sarcoma family syndrome of Li and Fraumeni, Glioma, Neoplasm Metastasis, Melanoma, Stomach Neoplasms, Sarcoma, Lung Neoplasms, Colorectal Neoplasms, Leukemia, Lymphocytic, Chronic, B-Cell, Carcinoma, Non-Small-Cell Lung, Colonic Neoplasms, Ad…	Weight Gain	FALSE	FALSE	1	1
TP53	MMP13	tf-gene	Predicted	TRED	Adenocarcinoma, Carcinoma, Hepatocellular, Carcinoma, Squamous Cell, Small Cell Lung Carcinoma, Carcinoma, Breast Neoplasms, Ischemia, Li-Fraumeni Syndrome, Sarcoma family syndrome of Li and Fraumeni, Glioma, Neoplasm Metastasis, Melanoma, Stomach Neoplasms, Sarcoma, Lung Neoplasms, Colorectal Neoplasms, Leukemia, Lymphocytic, Chronic, B-Cell, Carcinoma, Non-Small-Cell Lung, Colonic Neoplasms, Ad…	Spondyloepimetaphyseal Dysplasia, Missouri Type, Liver Cirrhosis, Experimental, Craniofacial Abnormalities, Prostatic Neoplasms	FALSE	FALSE	1	1
TP53	NDRG1	tf-gene	Experimental	Transfac	Adenocarcinoma, Carcinoma, Hepatocellular, Carcinoma, Squamous Cell, Small Cell Lung Carcinoma, Carcinoma, Breast Neoplasms, Ischemia, Li-Fraumeni Syndrome, Sarcoma family syndrome of Li and Fraumeni, Glioma, Neoplasm Metastasis, Melanoma, Stomach Neoplasms, Sarcoma, Lung Neoplasms, Colorectal Neoplasms, Leukemia, Lymphocytic, Chronic, B-Cell, Carcinoma, Non-Small-Cell Lung, Colonic Neoplasms, Ad…	Neuropathy, hereditary motor and sensory, LOM type, Neoplasm Metastasis, Breast Neoplasms, Prostatic Neoplasms, Kidney Neoplasms, Melanoma, Carcinoma, Non-Small-Cell Lung, Carcinoma, Renal Cell, Glioblastoma, Astrocytoma, Carcinoma, Pancreatic Ductal, Hemangioblastoma, Liver Neoplasms, Small Cell Lung Carcinoma, Smooth Muscle Tumor	FALSE	FALSE	-1	1
TP53	CASP8	tf-gene	Predicted	TRED	Adenocarcinoma, Carcinoma, Hepatocellular, Carcinoma, Squamous Cell, Small Cell Lung Carcinoma, Carcinoma, Breast Neoplasms, Ischemia, Li-Fraumeni Syndrome, Sarcoma family syndrome of Li and Fraumeni, Glioma, Neoplasm Metastasis, Melanoma, Stomach Neoplasms, Sarcoma, Lung Neoplasms, Colorectal Neoplasms, Leukemia, Lymphocytic, Chronic, B-Cell, Carcinoma, Non-Small-Cell Lung, Colonic Neoplasms, Ad…	CASPASE 8 DEFICIENCY, Status Epilepticus, Breast Neoplasms, Lung Neoplasms, Carcinoma, Hepatocellular, Melanoma, Carcinoma, Non-Small-Cell Lung, Carcinoma, squamous cell of head and neck, Autoimmune Lymphoproliferative Syndrome, Adenocarcinoma, Colorectal Neoplasms, Esophageal Neoplasms, Cerebral Hemorrhage, Dermatitis, Allergic Contact, Diabetes Mellitus, Type 2, Edema, Myocardial Reperfusion In…	FALSE	FALSE	1	1
TP53	BCL3	tf-gene	Predicted	TRED	Adenocarcinoma, Carcinoma, Hepatocellular, Carcinoma, Squamous Cell, Small Cell Lung Carcinoma, Carcinoma, Breast Neoplasms, Ischemia, Li-Fraumeni Syndrome, Sarcoma family syndrome of Li and Fraumeni, Glioma, Neoplasm Metastasis, Melanoma, Stomach Neoplasms, Sarcoma, Lung Neoplasms, Colorectal Neoplasms, Leukemia, Lymphocytic, Chronic, B-Cell, Carcinoma, Non-Small-Cell Lung, Colonic Neoplasms, Ad…		FALSE	FALSE	1	1
TP53	TP53	tf-gene	Experimental	Transfac	Adenocarcinoma, Carcinoma, Hepatocellular, Carcinoma, Squamous Cell, Small Cell Lung Carcinoma, Carcinoma, Breast Neoplasms, Ischemia, Li-Fraumeni Syndrome, Sarcoma family syndrome of Li and Fraumeni, Glioma, Neoplasm Metastasis, Melanoma, Stomach Neoplasms, Sarcoma, Lung Neoplasms, Colorectal Neoplasms, Leukemia, Lymphocytic, Chronic, B-Cell, Carcinoma, Non-Small-Cell Lung, Colonic Neoplasms, Ad…	Adenocarcinoma, Carcinoma, Hepatocellular, Carcinoma, Squamous Cell, Small Cell Lung Carcinoma, Carcinoma, Breast Neoplasms, Ischemia, Li-Fraumeni Syndrome, Sarcoma family syndrome of Li and Fraumeni, Glioma, Neoplasm Metastasis, Melanoma, Stomach Neoplasms, Sarcoma, Lung Neoplasms, Colorectal Neoplasms, Leukemia, Lymphocytic, Chronic, B-Cell, Carcinoma, Non-Small-Cell Lung, Colonic Neoplasms, Ad…	FALSE	FALSE	1	1
TP53	FOS	tf-gene	Predicted	TRED	Adenocarcinoma, Carcinoma, Hepatocellular, Carcinoma, Squamous Cell, Small Cell Lung Carcinoma, Carcinoma, Breast Neoplasms, Ischemia, Li-Fraumeni Syndrome, Sarcoma family syndrome of Li and Fraumeni, Glioma, Neoplasm Metastasis, Melanoma, Stomach Neoplasms, Sarcoma, Lung Neoplasms, Colorectal Neoplasms, Leukemia, Lymphocytic, Chronic, B-Cell, Carcinoma, Non-Small-Cell Lung, Colonic Neoplasms, Ad…	Hypertension, Reperfusion Injury, Carcinoma, Hepatocellular, Breast Neoplasms, Endometriosis, Seizures, Amphetamine-Related Disorders, Amyotrophic lateral sclerosis 1, Anxiety Disorders, Brain Injuries, Cocaine-Related Disorders, Epilepsy, Fibrous Dysplasia of Bone, Hemorrhage, Hyperkinesis, Infarction, Middle Cerebral Artery, Lung Neoplasms, Nervous System Diseases, Neurotoxicity Syndromes, Stat…	FALSE	FALSE	1	1
TP53	hsa-mir-34a	tf-mirna	Experimental	Transmir	Adenocarcinoma, Carcinoma, Hepatocellular, Carcinoma, Squamous Cell, Small Cell Lung Carcinoma, Carcinoma, Breast Neoplasms, Ischemia, Li-Fraumeni Syndrome, Sarcoma family syndrome of Li and Fraumeni, Glioma, Neoplasm Metastasis, Melanoma, Stomach Neoplasms, Sarcoma, Lung Neoplasms, Colorectal Neoplasms, Leukemia, Lymphocytic, Chronic, B-Cell, Carcinoma, Non-Small-Cell Lung, Colonic Neoplasms, Ad…	Breast Neoplasms, Colonic Neoplasms, Lung Neoplasms, Muscular Disorders, Atrophic, Neuroblastoma, Lymphoma, B-Cell, Leukemia, Promyelocytic, Acute, Precursor Cell Lymphoblastic Leukemia-Lymphoma, Neoplasms, Neoplasms, Uterine Cervical Neoplasms, Stomach Neoplasms, Carcinoma, Hepatocellular, Carcinoma, Hepatocellular, Carcinoma, Hepatocellular, Melanoma, Lung Neoplasms, Leukemia, Lymphocytic, Chro…	FALSE	FALSE	1	1
TP53	BAX	tf-gene	Experimental	Transfac	Adenocarcinoma, Carcinoma, Hepatocellular, Carcinoma, Squamous Cell, Small Cell Lung Carcinoma, Carcinoma, Breast Neoplasms, Ischemia, Li-Fraumeni Syndrome, Sarcoma family syndrome of Li and Fraumeni, Glioma, Neoplasm Metastasis, Melanoma, Stomach Neoplasms, Sarcoma, Lung Neoplasms, Colorectal Neoplasms, Leukemia, Lymphocytic, Chronic, B-Cell, Carcinoma, Non-Small-Cell Lung, Colonic Neoplasms, Ad…	Alzheimer Disease, Diabetes Mellitus, Experimental, Breast Neoplasms, Colonic Neoplasms, Prostatic Neoplasms, Esophageal Neoplasms, Acute Kidney Injury, Cerebral Hemorrhage, Drug-Induced Liver Injury, HIV Infections, Intestinal Neoplasms, Ischemia, Lymphoma, T-Cell, Cutaneous, Myocardial Infarction, Myocardial Reperfusion Injury, Nerve Degeneration, Peripheral Nervous System Diseases	FALSE	FALSE	1	1
TP53	CASP1	tf-gene	Experimental	Transfac	Adenocarcinoma, Carcinoma, Hepatocellular, Carcinoma, Squamous Cell, Small Cell Lung Carcinoma, Carcinoma, Breast Neoplasms, Ischemia, Li-Fraumeni Syndrome, Sarcoma family syndrome of Li and Fraumeni, Glioma, Neoplasm Metastasis, Melanoma, Stomach Neoplasms, Sarcoma, Lung Neoplasms, Colorectal Neoplasms, Leukemia, Lymphocytic, Chronic, B-Cell, Carcinoma, Non-Small-Cell Lung, Colonic Neoplasms, Ad…	Amyotrophic lateral sclerosis 1, Pneumonia, Hypersensitivity, Myocardial Reperfusion Injury, Status Epilepticus	FALSE	FALSE	-1	1
TP53	ERBB2	tf-gene	Predicted	TRED	Adenocarcinoma, Carcinoma, Hepatocellular, Carcinoma, Squamous Cell, Small Cell Lung Carcinoma, Carcinoma, Breast Neoplasms, Ischemia, Li-Fraumeni Syndrome, Sarcoma family syndrome of Li and Fraumeni, Glioma, Neoplasm Metastasis, Melanoma, Stomach Neoplasms, Sarcoma, Lung Neoplasms, Colorectal Neoplasms, Leukemia, Lymphocytic, Chronic, B-Cell, Carcinoma, Non-Small-Cell Lung, Colonic Neoplasms, Ad…	Breast Neoplasms, Mammary Neoplasms, Experimental, Neoplasm Metastasis, Adenocarcinoma, Ovarian Neoplasms, Prostatic Neoplasms, Lung Neoplasms, Stomach Neoplasms, Cholangiocarcinoma, Glioma, Medulloblastoma, Colonic Neoplasms, Esophageal Neoplasms, Carcinoma, Renal Cell, Lymphatic Metastasis, Papilloma, Disease Progression, Gastrointestinal Neoplasms, Mammary Neoplasms, Animal, Neoplasm Recurrenc…	FALSE	FALSE	1	1
TP53	ADARB1	tf-gene	Experimental	Oreganno	Adenocarcinoma, Carcinoma, Hepatocellular, Carcinoma, Squamous Cell, Small Cell Lung Carcinoma, Carcinoma, Breast Neoplasms, Ischemia, Li-Fraumeni Syndrome, Sarcoma family syndrome of Li and Fraumeni, Glioma, Neoplasm Metastasis, Melanoma, Stomach Neoplasms, Sarcoma, Lung Neoplasms, Colorectal Neoplasms, Leukemia, Lymphocytic, Chronic, B-Cell, Carcinoma, Non-Small-Cell Lung, Colonic Neoplasms, Ad…	Polycystic Ovary Syndrome	FALSE	FALSE	1	1
TP53	SESN2	tf-gene	Predicted	TRED	Adenocarcinoma, Carcinoma, Hepatocellular, Carcinoma, Squamous Cell, Small Cell Lung Carcinoma, Carcinoma, Breast Neoplasms, Ischemia, Li-Fraumeni Syndrome, Sarcoma family syndrome of Li and Fraumeni, Glioma, Neoplasm Metastasis, Melanoma, Stomach Neoplasms, Sarcoma, Lung Neoplasms, Colorectal Neoplasms, Leukemia, Lymphocytic, Chronic, B-Cell, Carcinoma, Non-Small-Cell Lung, Colonic Neoplasms, Ad…		FALSE	FALSE	1	1
VDR	CDKN1A	tf-gene	Experimental	Transfac	Vitamin D-Dependent Rickets, Type 2A, Osteoporosis, Rickets, Prostatic Neoplasms, Hypertension, Vitamin D Deficiency, Neoplasms, Alopecia, Uremia, Carcinoma, Transitional Cell, Epilepsy, Temporal Lobe, Genetic Diseases, Inborn, Leukemia, Lymphocytic, Chronic, B-Cell	Colonic Neoplasms, Prostatic Neoplasms, Urinary Bladder Neoplasms, Lung Neoplasms, Papilloma, Stomach Neoplasms, Esophageal Squamous Cell Carcinoma, Carcinoma, Transitional Cell, Intestinal Neoplasms, HIV Infections, Kidney Diseases, Muscular Dystrophy, Facioscapulohumeral, Reperfusion Injury	FALSE	FALSE	1	1
VDR	IGFBP1	tf-gene	Experimental	PMID20584335	Vitamin D-Dependent Rickets, Type 2A, Osteoporosis, Rickets, Prostatic Neoplasms, Hypertension, Vitamin D Deficiency, Neoplasms, Alopecia, Uremia, Carcinoma, Transitional Cell, Epilepsy, Temporal Lobe, Genetic Diseases, Inborn, Leukemia, Lymphocytic, Chronic, B-Cell	Endometriosis, Abortion, Spontaneous, Colonic Neoplasms, Drug Toxicity, Liver Cirrhosis, Biliary, Liver Cirrhosis, Experimental, Precancerous Conditions	FALSE	FALSE	1	1
ZEB1	hsa-mir-34a	tf-mirna	Experimental	Transmir	Corneal Dystrophy, Fuchs Endothelial, 6, Corneal Dystrophy, Posterior Polymorphous, 3, Breast Neoplasms, Cell Transformation, Neoplastic, Disease Progression, Myocardial Ischemia, Neoplasm Invasiveness	Breast Neoplasms, Colonic Neoplasms, Lung Neoplasms, Muscular Disorders, Atrophic, Neuroblastoma, Lymphoma, B-Cell, Leukemia, Promyelocytic, Acute, Precursor Cell Lymphoblastic Leukemia-Lymphoma, Neoplasms, Neoplasms, Uterine Cervical Neoplasms, Stomach Neoplasms, Carcinoma, Hepatocellular, Carcinoma, Hepatocellular, Carcinoma, Hepatocellular, Melanoma, Lung Neoplasms, Leukemia, Lymphocytic, Chro…	FALSE	FALSE	1	1
hsa-let-7a	CASP8	mirna-gene	Experimental	mirtarbase.adstudy	Carcinoma, Non-Small-Cell Lung, Stomach Neoplasms, Stomach Neoplasms	CASPASE 8 DEFICIENCY, Status Epilepticus, Breast Neoplasms, Lung Neoplasms, Carcinoma, Hepatocellular, Melanoma, Carcinoma, Non-Small-Cell Lung, Carcinoma, squamous cell of head and neck, Autoimmune Lymphoproliferative Syndrome, Adenocarcinoma, Colorectal Neoplasms, Esophageal Neoplasms, Cerebral Hemorrhage, Dermatitis, Allergic Contact, Diabetes Mellitus, Type 2, Edema, Myocardial Reperfusion In…	FALSE	FALSE	1	-1
hsa-let-7b	DOCK5	mirna-gene	Experimental	mirtarbase.adstudy	Colonic Neoplasms, Heart Failure, Lung Neoplasms, Lung Neoplasms, Lung Neoplasms, Lung Neoplasms, Lung Neoplasms, Lung Neoplasms, Lung Neoplasms, Neoplasms, Neoplasms, Neoplasms, Ovarian Neoplasms, Neoplasms, Digestive System Neoplasms, Head and Neck Neoplasms, Neoplasms, Sarcoma, Kaposi, Lung Neoplasms, Melanoma, Pancreatic Neoplasms, Pituitary Neoplasms, Lymphoma, Primary Effusion, Adrenocortic…		FALSE	FALSE	1	-1
hsa-let-7b	SNAP23	mirna-gene	Experimental	mirtarbase.adstudy	Colonic Neoplasms, Heart Failure, Lung Neoplasms, Lung Neoplasms, Lung Neoplasms, Lung Neoplasms, Lung Neoplasms, Lung Neoplasms, Lung Neoplasms, Neoplasms, Neoplasms, Neoplasms, Ovarian Neoplasms, Neoplasms, Digestive System Neoplasms, Head and Neck Neoplasms, Neoplasms, Sarcoma, Kaposi, Lung Neoplasms, Melanoma, Pancreatic Neoplasms, Pituitary Neoplasms, Lymphoma, Primary Effusion, Adrenocortic…	Myocardial Ischemia	FALSE	FALSE	1	-1
hsa-let-7b	MAP7D1	mirna-gene	Experimental	mirtarbase.adstudy	Colonic Neoplasms, Heart Failure, Lung Neoplasms, Lung Neoplasms, Lung Neoplasms, Lung Neoplasms, Lung Neoplasms, Lung Neoplasms, Lung Neoplasms, Neoplasms, Neoplasms, Neoplasms, Ovarian Neoplasms, Neoplasms, Digestive System Neoplasms, Head and Neck Neoplasms, Neoplasms, Sarcoma, Kaposi, Lung Neoplasms, Melanoma, Pancreatic Neoplasms, Pituitary Neoplasms, Lymphoma, Primary Effusion, Adrenocortic…		FALSE	FALSE	-1	-1
hsa-let-7c-5p	TNFAIP3	mirna-gene	Predicted	Starbase		Lupus Erythematosus, Systemic, Arthritis, Rheumatoid, Psoriasis	FALSE	FALSE	1	-1
hsa-let-7c-5p	GIPC1	mirna-gene	Predicted	Starbase			FALSE	FALSE	1	-1
hsa-let-7c-5p	ZNF362	mirna-gene	Predicted	Starbase			FALSE	FALSE	-1	-1
hsa-let-7c-5p	PAPPA	mirna-gene	Predicted	Starbase		Acute Coronary Syndrome, Myocardial Infarction, Angina, Unstable, Endometriosis, Coronary Artery Disease, Infertility, Female	FALSE	FALSE	1	-1
hsa-let-7c-5p	PRTG	mirna-gene	Predicted	Starbase			FALSE	FALSE	1	-1
hsa-let-7c-5p	KLHL13	mirna-gene	Predicted	Starbase			FALSE	FALSE	-1	-1
hsa-let-7c-5p	SNAP23	mirna-gene	Predicted	Starbase		Myocardial Ischemia	FALSE	FALSE	1	-1
hsa-let-7c-5p	PBX3	mirna-gene	Predicted	Starbase			FALSE	FALSE	-1	-1
hsa-let-7c-5p	DOT1L	mirna-gene	Predicted	Starbase			FALSE	FALSE	1	-1
hsa-let-7c-5p	POLR3D	mirna-gene	Predicted	Starbase			FALSE	FALSE	1	-1
hsa-let-7c-5p	SLC16A9	mirna-gene	Predicted	Starbase			FALSE	FALSE	1	-1
hsa-let-7c-5p	ONECUT2	mirna-gene	Predicted	Starbase			FALSE	FALSE	1	-1
hsa-let-7c-5p	KREMEN1	mirna-gene	Predicted	Starbase			FALSE	FALSE	1	-1
hsa-let-7c-5p	TGFBR1	mirna-gene	Experimental	mirtarbase		LOEYS-DIETZ SYNDROME, TYPE 1A, Loeys-Dietz Syndrome, Type 2A, Keratoacanthoma familial, Colorectal Neoplasms, Loeys-Dietz Syndrome, Skin Neoplasms, Aneurysm, Dissecting, Abortion, Spontaneous, Auditory Neuropathy, Autosomal Dominant, 1, Uremia	FALSE	FALSE	1	-1
hsa-let-7c-5p	ELOVL4	mirna-gene	Predicted	Starbase		Stargardt disease 3	FALSE	FALSE	-1	-1
hsa-let-7c-5p	ACER2	mirna-gene	Predicted	Starbase			FALSE	FALSE	1	-1
hsa-let-7c-5p	TNFRSF1B	mirna-gene	Predicted	Starbase		Diabetes Mellitus, Type 2, Obesity, Pneumonia, Autistic Disorder, Brain Ischemia, Fractures, Bone, Hypersensitivity, Hypoalbuminemia, Liver Cirrhosis, Non-alcoholic Fatty Liver Disease	FALSE	FALSE	1	-1
hsa-let-7c-5p	XYLT1	mirna-gene	Predicted	Starbase		Pseudoxanthoma Elasticum, Substance-Related Disorders	FALSE	FALSE	1	-1
hsa-let-7c-5p	RBMS1	mirna-gene	Predicted	Starbase			FALSE	FALSE	1	-1
hsa-let-7c-5p	SLC5A6	mirna-gene	Predicted	Starbase			FALSE	FALSE	1	-1
hsa-let-7d-5p	ACER2	mirna-gene	Predicted	Starbase			FALSE	FALSE	1	-1
hsa-let-7d-5p	ELOVL4	mirna-gene	Predicted	Starbase		Stargardt disease 3	FALSE	FALSE	-1	-1
hsa-let-7d-5p	GIPC1	mirna-gene	Predicted	Starbase			FALSE	FALSE	1	-1
hsa-let-7d-5p	PBX3	mirna-gene	Predicted	Starbase			FALSE	FALSE	-1	-1
hsa-let-7d-5p	KLHL13	mirna-gene	Predicted	Starbase			FALSE	FALSE	-1	-1
hsa-let-7d-5p	TGFBR1	mirna-gene	Predicted	Starbase		LOEYS-DIETZ SYNDROME, TYPE 1A, Loeys-Dietz Syndrome, Type 2A, Keratoacanthoma familial, Colorectal Neoplasms, Loeys-Dietz Syndrome, Skin Neoplasms, Aneurysm, Dissecting, Abortion, Spontaneous, Auditory Neuropathy, Autosomal Dominant, 1, Uremia	FALSE	FALSE	1	-1
hsa-let-7d-5p	SLC5A6	mirna-gene	Predicted	Starbase			FALSE	FALSE	1	-1
hsa-let-7d-5p	SLC16A9	mirna-gene	Predicted	Starbase			FALSE	FALSE	1	-1
hsa-let-7d-5p	KREMEN1	mirna-gene	Predicted	Starbase			FALSE	FALSE	1	-1
hsa-let-7d-5p	ONECUT2	mirna-gene	Predicted	Starbase			FALSE	FALSE	1	-1
hsa-let-7d-5p	DOT1L	mirna-gene	Predicted	Starbase			FALSE	FALSE	1	-1
hsa-let-7d-5p	ZNF362	mirna-gene	Predicted	Starbase			FALSE	FALSE	-1	-1
hsa-let-7d-5p	PRTG	mirna-gene	Predicted	Starbase			FALSE	FALSE	1	-1
hsa-let-7d-5p	XYLT1	mirna-gene	Predicted	Starbase		Pseudoxanthoma Elasticum, Substance-Related Disorders	FALSE	FALSE	1	-1
hsa-let-7d-5p	POLR3D	mirna-gene	Predicted	Starbase			FALSE	FALSE	1	-1
hsa-let-7d-5p	SNAP23	mirna-gene	Predicted	Starbase		Myocardial Ischemia	FALSE	FALSE	1	-1
hsa-let-7d-5p	TNFAIP3	mirna-gene	Predicted	Starbase		Lupus Erythematosus, Systemic, Arthritis, Rheumatoid, Psoriasis	FALSE	FALSE	1	-1
hsa-let-7d-5p	RBMS1	mirna-gene	Predicted	Starbase			FALSE	FALSE	1	-1
hsa-let-7d-5p	PAPPA	mirna-gene	Predicted	Starbase		Acute Coronary Syndrome, Myocardial Infarction, Angina, Unstable, Endometriosis, Coronary Artery Disease, Infertility, Female	FALSE	FALSE	1	-1
hsa-let-7d-5p	TNFRSF1B	mirna-gene	Predicted	Starbase		Diabetes Mellitus, Type 2, Obesity, Pneumonia, Autistic Disorder, Brain Ischemia, Fractures, Bone, Hypersensitivity, Hypoalbuminemia, Liver Cirrhosis, Non-alcoholic Fatty Liver Disease	FALSE	FALSE	1	-1
hsa-mir-103	hsa-mir-129-5p	mirna-mirna	Predicted	Pmmr			FALSE	FALSE	-1	-1
hsa-mir-122	SLC7A1	mirna-gene	Experimental	mirtarbase.adstudy	Carcinoma, Hepatocellular, Hepatitis, Hepatitis C, Lipid Metabolism Disorders, Hepatitis C, Hepatitis C, Hepatitis C, Carcinoma, Hepatocellular, Carcinoma, Hepatocellular, Carcinoma, Hepatocellular, Carcinoma, Hepatocellular, Carcinoma, Hepatocellular, Carcinoma, Hepatocellular, Stroke, Hepatitis C, Liver Neoplasms, Hepatitis C, Chronic, Stroke, Carcinoma, Hepatocellular, Multiple Sclerosis, Neop…	Prostatic Neoplasms	FALSE	FALSE	1	-1
hsa-mir-122	CCNG1	mirna-gene	Experimental	mirtarbase.adstudy	Carcinoma, Hepatocellular, Hepatitis, Hepatitis C, Lipid Metabolism Disorders, Hepatitis C, Hepatitis C, Hepatitis C, Carcinoma, Hepatocellular, Carcinoma, Hepatocellular, Carcinoma, Hepatocellular, Carcinoma, Hepatocellular, Carcinoma, Hepatocellular, Carcinoma, Hepatocellular, Stroke, Hepatitis C, Liver Neoplasms, Hepatitis C, Chronic, Stroke, Carcinoma, Hepatocellular, Multiple Sclerosis, Neop…	Lung Neoplasms	FALSE	FALSE	1	-1
hsa-mir-125a	ERBB2	mirna-gene	Experimental	tarbase.adstudy	Breast Neoplasms, Breast Neoplasms, Carcinoma, Hepatocellular, Carcinoma, Hepatocellular, Heart Failure, Lung Neoplasms, Muscular Disorders, Atrophic, Ovarian Neoplasms, Endometriosis, Leukemia, Medulloblastoma, Retinal Degeneration, Ovarian Neoplasms, Breast Neoplasms, Hepatoblastoma, Atrophy, Myelodysplastic Syndromes, Carcinoma, Non-Small-Cell Lung, Carcinoma, Non-Small-Cell Lung, Carcinoma, S…	Breast Neoplasms, Mammary Neoplasms, Experimental, Neoplasm Metastasis, Adenocarcinoma, Ovarian Neoplasms, Prostatic Neoplasms, Lung Neoplasms, Stomach Neoplasms, Cholangiocarcinoma, Glioma, Medulloblastoma, Colonic Neoplasms, Esophageal Neoplasms, Carcinoma, Renal Cell, Lymphatic Metastasis, Papilloma, Disease Progression, Gastrointestinal Neoplasms, Mammary Neoplasms, Animal, Neoplasm Recurrenc…	FALSE	FALSE	1	-1
hsa-mir-125b-5p	BCL3	mirna-gene	Experimental	mirtarbase			FALSE	FALSE	1	-1
hsa-mir-125b-5p	MAMDC2	mirna-gene	Predicted	Starbase			FALSE	FALSE	-1	-1
hsa-mir-125b-5p	ATP13A3	mirna-gene	Predicted	Starbase			FALSE	FALSE	1	-1
hsa-mir-125b-5p	SLC7A1	mirna-gene	Predicted	Starbase		Prostatic Neoplasms	FALSE	FALSE	1	-1
hsa-mir-125b-5p	ATXN1	mirna-gene	Predicted	Starbase		Spinocerebellar Ataxias	FALSE	FALSE	1	-1
hsa-mir-125b-5p	MAP3K10	mirna-gene	Predicted	Starbase			FALSE	FALSE	1	-1
hsa-mir-125b-5p	TNFAIP3	mirna-gene	Experimental	mirtarbase		Lupus Erythematosus, Systemic, Arthritis, Rheumatoid, Psoriasis	FALSE	FALSE	1	-1
hsa-mir-125b-5p	TP53	mirna-gene	Experimental	mirtarbase		Adenocarcinoma, Carcinoma, Hepatocellular, Carcinoma, Squamous Cell, Small Cell Lung Carcinoma, Carcinoma, Breast Neoplasms, Ischemia, Li-Fraumeni Syndrome, Sarcoma family syndrome of Li and Fraumeni, Glioma, Neoplasm Metastasis, Melanoma, Stomach Neoplasms, Sarcoma, Lung Neoplasms, Colorectal Neoplasms, Leukemia, Lymphocytic, Chronic, B-Cell, Carcinoma, Non-Small-Cell Lung, Colonic Neoplasms, Ad…	FALSE	FALSE	1	-1
hsa-mir-125b-5p	MMP13	mirna-gene	Experimental	mirtarbase		Spondyloepimetaphyseal Dysplasia, Missouri Type, Liver Cirrhosis, Experimental, Craniofacial Abnormalities, Prostatic Neoplasms	FALSE	FALSE	1	-1
hsa-mir-125b-5p	GRB10	mirna-gene	Predicted	Starbase			FALSE	FALSE	1	-1
hsa-mir-125b-5p	LIFR	mirna-gene	Predicted	Starbase		Stuve-Wiedemann syndrome, Polycystic Ovary Syndrome, Prostatic Neoplasms	FALSE	FALSE	1	-1
hsa-mir-125b-5p	VDR	mirna-gene	Experimental	mirtarbase		Vitamin D-Dependent Rickets, Type 2A, Osteoporosis, Rickets, Prostatic Neoplasms, Hypertension, Vitamin D Deficiency, Neoplasms, Alopecia, Uremia, Carcinoma, Transitional Cell, Epilepsy, Temporal Lobe, Genetic Diseases, Inborn, Leukemia, Lymphocytic, Chronic, B-Cell	FALSE	FALSE	1	-1
hsa-mir-125b-5p	ERBB2	mirna-gene	Experimental	mirtarbase		Breast Neoplasms, Mammary Neoplasms, Experimental, Neoplasm Metastasis, Adenocarcinoma, Ovarian Neoplasms, Prostatic Neoplasms, Lung Neoplasms, Stomach Neoplasms, Cholangiocarcinoma, Glioma, Medulloblastoma, Colonic Neoplasms, Esophageal Neoplasms, Carcinoma, Renal Cell, Lymphatic Metastasis, Papilloma, Disease Progression, Gastrointestinal Neoplasms, Mammary Neoplasms, Animal, Neoplasm Recurrenc…	FALSE	FALSE	1	-1
hsa-mir-125b-5p	CYP24A1	mirna-gene	Experimental	mirtarbase		Lung Neoplasms, Hypercalcemia, Idiopathic, of Infancy, Abortion, Spontaneous, Peripheral Nervous System Diseases, Renal Insufficiency	FALSE	FALSE	1	-1
hsa-mir-125b-5p	TMEM136	mirna-gene	Predicted	Starbase			FALSE	FALSE	-1	-1
hsa-mir-128-3p	PDE10A	mirna-gene	Predicted	Starbase			FALSE	FALSE	1	-1
hsa-mir-128-3p	RPS6KA5	mirna-gene	Predicted	Starbase		Cocaine-Related Disorders	FALSE	FALSE	1	-1
hsa-mir-128-3p	SESN2	mirna-gene	Predicted	Starbase			FALSE	FALSE	1	-1
hsa-mir-128-3p	PDE8B	mirna-gene	Predicted	Starbase		Adrenal Hyperplasia, Congenital, Basal Ganglia Diseases, Muscle Rigidity, Striatal Degeneration, Autosomal Dominant, PIGMENTED NODULAR ADRENOCORTICAL DISEASE, PRIMARY, 3, Dysarthria, Neurodegenerative Diseases	FALSE	FALSE	1	-1
hsa-mir-128-3p	ARID4B	mirna-gene	Predicted	Starbase		Carcinoma, Adenoid Cystic	FALSE	FALSE	1	-1
hsa-mir-128-3p	TGFBR1	mirna-gene	Experimental	mirtarbase		LOEYS-DIETZ SYNDROME, TYPE 1A, Loeys-Dietz Syndrome, Type 2A, Keratoacanthoma familial, Colorectal Neoplasms, Loeys-Dietz Syndrome, Skin Neoplasms, Aneurysm, Dissecting, Abortion, Spontaneous, Auditory Neuropathy, Autosomal Dominant, 1, Uremia	FALSE	FALSE	1	-1
hsa-mir-128-3p	FOXQ1	mirna-gene	Predicted	Starbase			FALSE	FALSE	-1	-1
hsa-mir-128-3p	TMEM64	mirna-gene	Predicted	Starbase			FALSE	FALSE	1	-1
hsa-mir-128-3p	TBC1D9B	mirna-gene	Predicted	Starbase			FALSE	FALSE	1	-1
hsa-mir-128-3p	CCNG1	mirna-gene	Predicted	Starbase		Lung Neoplasms	FALSE	FALSE	1	-1
hsa-mir-128-3p	ELMO1	mirna-gene	Predicted	Starbase		Adenocarcinoma Of Esophagus	FALSE	FALSE	-1	-1
hsa-mir-128-3p	ADORA2B	mirna-gene	Predicted	Starbase			FALSE	FALSE	1	-1
hsa-mir-129-5p	CBX7	mirna-gene	Predicted	Starbase			FALSE	FALSE	1	-1
hsa-mir-129-5p	PBX3	mirna-gene	Predicted	Starbase			FALSE	FALSE	-1	-1
hsa-mir-129-5p	CAMK2N1	mirna-gene	Predicted	Starbase			FALSE	FALSE	-1	-1
hsa-mir-129-5p	BMPR2	mirna-gene	Experimental	mirtarbase.adstudy		Pulmonary arterial hypertension, Hypertension, Pulmonary, Pulmonary Veno-Occlusive Disease, Hyperandrogenism	FALSE	FALSE	1	-1
hsa-mir-129-5p	RBMS1	mirna-gene	Predicted	Starbase			FALSE	FALSE	1	-1
hsa-mir-129-5p	SOX4	mirna-gene	Experimental	mirtarbase.adstudy		Carcinoma, Adenoid Cystic, Liver Neoplasms, Experimental, Salivary Gland Neoplasms	FALSE	FALSE	-1	-1
hsa-mir-130a	hsa-mir-129-5p	mirna-mirna	Predicted	Pmmr	Heart Failure, Muscular Disorders, Atrophic, Thyroid Neoplasms, Ovarian Neoplasms, Adrenocortical Carcinoma, Adrenocortical Adenoma, Coronary Artery Disease, Head and Neck Neoplasms, Carcinoma, Squamous Cell, Leukemia, Myeloid, Carcinoma, Non-Small-Cell Lung, Carcinoma, Hepatocellular, Stomach Neoplasms, Periodontitis, Leukemia, Lymphocytic, Chronic, B-Cell, Prostatic Neoplasms, Ovarian Neoplasms…		FALSE	FALSE	-1	1
hsa-mir-130a	hsa-let-7f	mirna-mirna	Predicted	Pmmr	Heart Failure, Muscular Disorders, Atrophic, Thyroid Neoplasms, Ovarian Neoplasms, Adrenocortical Carcinoma, Adrenocortical Adenoma, Coronary Artery Disease, Head and Neck Neoplasms, Carcinoma, Squamous Cell, Leukemia, Myeloid, Carcinoma, Non-Small-Cell Lung, Carcinoma, Hepatocellular, Stomach Neoplasms, Periodontitis, Leukemia, Lymphocytic, Chronic, B-Cell, Prostatic Neoplasms, Ovarian Neoplasms…		FALSE	FALSE	-1	1
hsa-mir-130a	ATXN1	mirna-gene	Experimental	mirtarbase.adstudy	Heart Failure, Muscular Disorders, Atrophic, Thyroid Neoplasms, Ovarian Neoplasms, Adrenocortical Carcinoma, Adrenocortical Adenoma, Coronary Artery Disease, Head and Neck Neoplasms, Carcinoma, Squamous Cell, Leukemia, Myeloid, Carcinoma, Non-Small-Cell Lung, Carcinoma, Hepatocellular, Stomach Neoplasms, Periodontitis, Leukemia, Lymphocytic, Chronic, B-Cell, Prostatic Neoplasms, Ovarian Neoplasms…	Spinocerebellar Ataxias	FALSE	FALSE	1	1
hsa-mir-130a	hsa-mir-196b	mirna-mirna	Predicted	Pmmr	Heart Failure, Muscular Disorders, Atrophic, Thyroid Neoplasms, Ovarian Neoplasms, Adrenocortical Carcinoma, Adrenocortical Adenoma, Coronary Artery Disease, Head and Neck Neoplasms, Carcinoma, Squamous Cell, Leukemia, Myeloid, Carcinoma, Non-Small-Cell Lung, Carcinoma, Hepatocellular, Stomach Neoplasms, Periodontitis, Leukemia, Lymphocytic, Chronic, B-Cell, Prostatic Neoplasms, Ovarian Neoplasms…	Neoplasms, Endometriosis, Hepatitis C, Leukemia, Neutropenia, Leukemia, Myeloid, Acute, Leukemia, Myeloid, Acute, Leukemia, Lymphocytic, Chronic, B-Cell, Adenoviridae Infections, Prostatic Neoplasms, Crohn Disease, Urinary Bladder Neoplasms, Hepatitis C, Leukemia, Myeloid, Acute, Glioblastoma, Precursor Cell Lymphoblastic Leukemia-Lymphoma, Pancreatic Neoplasms, Stomach Neoplasms, Leukemia, Gliob…	FALSE	FALSE	-1	1
hsa-mir-130b	hsa-let-7f	mirna-mirna	Predicted	Pmmr	Heart Failure, Head and Neck Neoplasms, Lupus Vulgaris, Prostatic Neoplasms, Stomach Neoplasms, Leukemia, Myeloid, Multiple Myeloma, Tuberculosis, Pulmonary, Pre-Eclampsia, Carcinoma, Hepatocellular, Head and Neck Neoplasms, Carcinoma, Renal Cell, Endometrial Neoplasms, Esophageal Neoplasms		FALSE	FALSE	-1	1
hsa-mir-130b	hsa-mir-196b	mirna-mirna	Predicted	Pmmr	Heart Failure, Head and Neck Neoplasms, Lupus Vulgaris, Prostatic Neoplasms, Stomach Neoplasms, Leukemia, Myeloid, Multiple Myeloma, Tuberculosis, Pulmonary, Pre-Eclampsia, Carcinoma, Hepatocellular, Head and Neck Neoplasms, Carcinoma, Renal Cell, Endometrial Neoplasms, Esophageal Neoplasms	Neoplasms, Endometriosis, Hepatitis C, Leukemia, Neutropenia, Leukemia, Myeloid, Acute, Leukemia, Myeloid, Acute, Leukemia, Lymphocytic, Chronic, B-Cell, Adenoviridae Infections, Prostatic Neoplasms, Crohn Disease, Urinary Bladder Neoplasms, Hepatitis C, Leukemia, Myeloid, Acute, Glioblastoma, Precursor Cell Lymphoblastic Leukemia-Lymphoma, Pancreatic Neoplasms, Stomach Neoplasms, Leukemia, Gliob…	FALSE	FALSE	-1	1
hsa-mir-130b	hsa-mir-129-5p	mirna-mirna	Predicted	Pmmr	Heart Failure, Head and Neck Neoplasms, Lupus Vulgaris, Prostatic Neoplasms, Stomach Neoplasms, Leukemia, Myeloid, Multiple Myeloma, Tuberculosis, Pulmonary, Pre-Eclampsia, Carcinoma, Hepatocellular, Head and Neck Neoplasms, Carcinoma, Renal Cell, Endometrial Neoplasms, Esophageal Neoplasms		FALSE	FALSE	-1	1
hsa-mir-135a	NR3C2	mirna-gene	Experimental	mirtarbase.adstudy		Hypertension, Early-Onset, Autosomal Dominant, with Severe Exacerbation in Pregnancy, PSEUDOHYPOALDOSTERONISM, TYPE I, AUTOSOMAL DOMINANT, Pseudohypoaldosteronism, Cardiomyopathy, Dilated, Heart Failure, Myocardial Infarction, Endometriosis, Ventricular Dysfunction, Left	FALSE	FALSE	1	1
hsa-mir-135b-5p	FOXN3	mirna-gene	Predicted	Starbase			FALSE	FALSE	1	1
hsa-mir-135b-5p	MAP4	mirna-gene	Predicted	Starbase		Weight Gain	FALSE	FALSE	1	1
hsa-mir-135b-5p	HIPK3	mirna-gene	Predicted	Starbase			FALSE	FALSE	1	1
hsa-mir-135b-5p	CCNG2	mirna-gene	Predicted	Starbase			FALSE	FALSE	-1	1
hsa-mir-135b-5p	NR3C2	mirna-gene	Predicted	Starbase		Hypertension, Early-Onset, Autosomal Dominant, with Severe Exacerbation in Pregnancy, PSEUDOHYPOALDOSTERONISM, TYPE I, AUTOSOMAL DOMINANT, Pseudohypoaldosteronism, Cardiomyopathy, Dilated, Heart Failure, Myocardial Infarction, Endometriosis, Ventricular Dysfunction, Left	FALSE	FALSE	1	1
hsa-mir-135b-5p	MAN2A1	mirna-gene	Predicted	Starbase			FALSE	FALSE	1	1
hsa-mir-141-3p	TOP1	mirna-gene	Predicted	Starbase		Neoplasms, Drug Toxicity	FALSE	FALSE	-1	1
hsa-mir-141-3p	MAP7D1	mirna-gene	Predicted	Starbase			FALSE	FALSE	-1	1
hsa-mir-141-3p	ZFPM2	mirna-gene	Experimental	mirtarbase		Tetralogy of Fallot, Hernia, Diaphragmatic, Diaphragmatic Hernia 3	FALSE	FALSE	-1	1
hsa-mir-141-3p	TET1	mirna-gene	Predicted	Starbase			FALSE	FALSE	1	1
hsa-mir-141-3p	STXBP1	mirna-gene	Predicted	Starbase		Epileptic Encephalopathy, Early Infantile, 4, Epilepsies, Myoclonic	FALSE	FALSE	-1	1
hsa-mir-141-3p	SLC23A2	mirna-gene	Predicted	Starbase		Cholestasis	FALSE	FALSE	1	1
hsa-mir-141-3p	PPARA	mirna-gene	Experimental	mirtarbase		Hypertension, Reperfusion Injury, Diabetes Mellitus, Type 2, Obesity, Dyslipidemias, Fatty Liver, Hyperlipidemias, Insulin Resistance, Dermatitis, Atopic, Carcinoma, Neoplasms, Inflammation, Kidney Failure, Chronic, Liver Neoplasms, Encephalomyelitis, Autoimmune, Experimental, Hepatomegaly, Hypoglycemia, Kidney Diseases, Kidney Tubular Necrosis, Acute, Muscular Diseases, Abdominal obesity metabol…	FALSE	FALSE	1	1
hsa-mir-141-3p	LMO3	mirna-gene	Predicted	Starbase			FALSE	FALSE	-1	1
hsa-mir-141-3p	DOCK4	mirna-gene	Predicted	Starbase		Autistic Disorder	FALSE	FALSE	1	1
hsa-mir-141-3p	APOLD1	mirna-gene	Predicted	Starbase			FALSE	FALSE	1	1
hsa-mir-141-3p	ZEB1	mirna-gene	Experimental	mirtarbase		Corneal Dystrophy, Fuchs Endothelial, 6, Corneal Dystrophy, Posterior Polymorphous, 3, Breast Neoplasms, Cell Transformation, Neoplastic, Disease Progression, Myocardial Ischemia, Neoplasm Invasiveness	FALSE	FALSE	1	1
hsa-mir-141-3p	ATXN1	mirna-gene	Predicted	Starbase		Spinocerebellar Ataxias	FALSE	FALSE	1	1
hsa-mir-145-5p	PBX3	mirna-gene	Predicted	Starbase			FALSE	FALSE	-1	-1
hsa-mir-145-5p	TLL1	mirna-gene	Predicted	Starbase		Atrial Septal Defect 6	FALSE	FALSE	1	-1
hsa-mir-145-5p	GPD2	mirna-gene	Predicted	Starbase		Diabetes Mellitus, Type 2, Diabetes Mellitus, Experimental, Methylmalonic acidemia, Osteoporosis	FALSE	FALSE	1	-1
hsa-mir-145-5p	ANKRD52	mirna-gene	Predicted	Starbase			FALSE	FALSE	1	-1
hsa-mir-145-5p	KREMEN1	mirna-gene	Experimental	mirtarbase			FALSE	FALSE	1	-1
hsa-mir-145-5p	MDM2	mirna-gene	Experimental	mirtarbase		Carcinoma, Non-Small-Cell Lung, Melanoma, Prostatic Neoplasms, Precancerous Conditions, Cell Transformation, Neoplastic, HIV Infections, Peripheral Nervous System Diseases	FALSE	FALSE	1	-1
hsa-mir-145-5p	SERPINE1	mirna-gene	Experimental	mirtarbase		Diabetic Nephropathies, Pre-Eclampsia, Thrombosis, Atherosclerosis, Kidney Failure, Chronic, Stomach Neoplasms, Fatty Liver, Prostatic Neoplasms, Liver Neoplasms, Autistic Disorder, Behcet Syndrome, Glomerulosclerosis, Focal Segmental, Nephrotic Syndrome, Cholestasis, Diabetes Mellitus, Experimental, Nervous System Diseases, Plasminogen Activator Inhibitor-1 Deficiency	FALSE	FALSE	1	-1
hsa-mir-145-5p	TBC1D22B	mirna-gene	Predicted	Starbase			FALSE	FALSE	1	-1
hsa-mir-145-5p	EBF1	mirna-gene	Predicted	Starbase			FALSE	FALSE	-1	-1
hsa-mir-145-5p	FMNL2	mirna-gene	Predicted	Starbase			FALSE	FALSE	1	-1
hsa-mir-145-5p	CDKN1A	mirna-gene	Experimental	mirtarbase		Colonic Neoplasms, Prostatic Neoplasms, Urinary Bladder Neoplasms, Lung Neoplasms, Papilloma, Stomach Neoplasms, Esophageal Squamous Cell Carcinoma, Carcinoma, Transitional Cell, Intestinal Neoplasms, HIV Infections, Kidney Diseases, Muscular Dystrophy, Facioscapulohumeral, Reperfusion Injury	FALSE	FALSE	1	-1
hsa-mir-145-5p	GRB10	mirna-gene	Predicted	Starbase			FALSE	FALSE	1	-1
hsa-mir-145-5p	MYO5A	mirna-gene	Experimental	mirtarbase		Griscelli syndrome type 1, Peripheral Nervous System Diseases	FALSE	FALSE	1	-1
hsa-mir-146a	CDKN1A	mirna-gene	Experimental	mirtarbase.adstudy	Breast Neoplasms, Leukemia, Lymphocytic, Chronic, B-Cell, Lung Neoplasms, Muscular Disorders, Atrophic, Pancreatic Neoplasms, Prostatic Neoplasms, Psoriasis, Psoriasis, Thyroid Neoplasms, Thyroid Neoplasms, Thyroid Neoplasms, Thyroid Neoplasms, Thyroid Neoplasms, Lymphoma, B-Cell, Burkitt Lymphoma, Eczema, Alzheimer Disease, Autistic Disorder, Breast Neoplasms, Breast Neoplasms, Breast Neoplasms,…	Colonic Neoplasms, Prostatic Neoplasms, Urinary Bladder Neoplasms, Lung Neoplasms, Papilloma, Stomach Neoplasms, Esophageal Squamous Cell Carcinoma, Carcinoma, Transitional Cell, Intestinal Neoplasms, HIV Infections, Kidney Diseases, Muscular Dystrophy, Facioscapulohumeral, Reperfusion Injury	FALSE	FALSE	1	1
hsa-mir-152	hsa-mir-21	mirna-mirna	Predicted	Pmmr	Asthma, Pre-Eclampsia, Adenocarcinoma, Carcinoma, Hepatocellular, Colonic Neoplasms, Gastrointestinal Neoplasms, Colorectal Neoplasms, Gastrointestinal Neoplasms, Endometrial Neoplasms, Endometrial Neoplasms, Ovarian Neoplasms, Pre-Eclampsia, Neuroblastoma, Atherosclerosis, Atherosclerosis, Breast Neoplasms, Glioma, Ovarian Neoplasms, Prostatic Neoplasms, Anxiety Disorders	Brain Neoplasms, Brain Neoplasms, Breast Neoplasms, Breast Neoplasms, Breast Neoplasms, Breast Neoplasms, Breast Neoplasms, Cholangiocarcinoma, Colonic Neoplasms, Dermatitis, Atopic, Focal Epithelial Hyperplasia, Glioblastoma, Glioblastoma, Glioblastoma, Glioblastoma, Glioblastoma, Glioblastoma, Heart Diseases, Heart Failure, Lung Neoplasms, Lung Neoplasms, Lymphoma, Large B-Cell, Diffuse, Muscul…	FALSE	FALSE	1	1
hsa-mir-152	hsa-let-7f	mirna-mirna	Predicted	Pmmr	Asthma, Pre-Eclampsia, Adenocarcinoma, Carcinoma, Hepatocellular, Colonic Neoplasms, Gastrointestinal Neoplasms, Colorectal Neoplasms, Gastrointestinal Neoplasms, Endometrial Neoplasms, Endometrial Neoplasms, Ovarian Neoplasms, Pre-Eclampsia, Neuroblastoma, Atherosclerosis, Atherosclerosis, Breast Neoplasms, Glioma, Ovarian Neoplasms, Prostatic Neoplasms, Anxiety Disorders		FALSE	FALSE	-1	1
hsa-mir-152	hsa-mir-129-5p	mirna-mirna	Predicted	Pmmr	Asthma, Pre-Eclampsia, Adenocarcinoma, Carcinoma, Hepatocellular, Colonic Neoplasms, Gastrointestinal Neoplasms, Colorectal Neoplasms, Gastrointestinal Neoplasms, Endometrial Neoplasms, Endometrial Neoplasms, Ovarian Neoplasms, Pre-Eclampsia, Neuroblastoma, Atherosclerosis, Atherosclerosis, Breast Neoplasms, Glioma, Ovarian Neoplasms, Prostatic Neoplasms, Anxiety Disorders		FALSE	FALSE	-1	1
hsa-mir-152	hsa-mir-135a	mirna-mirna	Predicted	Pmmr	Asthma, Pre-Eclampsia, Adenocarcinoma, Carcinoma, Hepatocellular, Colonic Neoplasms, Gastrointestinal Neoplasms, Colorectal Neoplasms, Gastrointestinal Neoplasms, Endometrial Neoplasms, Endometrial Neoplasms, Ovarian Neoplasms, Pre-Eclampsia, Neuroblastoma, Atherosclerosis, Atherosclerosis, Breast Neoplasms, Glioma, Ovarian Neoplasms, Prostatic Neoplasms, Anxiety Disorders		FALSE	FALSE	1	1
hsa-mir-152	hsa-mir-196b	mirna-mirna	Predicted	Pmmr	Asthma, Pre-Eclampsia, Adenocarcinoma, Carcinoma, Hepatocellular, Colonic Neoplasms, Gastrointestinal Neoplasms, Colorectal Neoplasms, Gastrointestinal Neoplasms, Endometrial Neoplasms, Endometrial Neoplasms, Ovarian Neoplasms, Pre-Eclampsia, Neuroblastoma, Atherosclerosis, Atherosclerosis, Breast Neoplasms, Glioma, Ovarian Neoplasms, Prostatic Neoplasms, Anxiety Disorders	Neoplasms, Endometriosis, Hepatitis C, Leukemia, Neutropenia, Leukemia, Myeloid, Acute, Leukemia, Myeloid, Acute, Leukemia, Lymphocytic, Chronic, B-Cell, Adenoviridae Infections, Prostatic Neoplasms, Crohn Disease, Urinary Bladder Neoplasms, Hepatitis C, Leukemia, Myeloid, Acute, Glioblastoma, Precursor Cell Lymphoblastic Leukemia-Lymphoma, Pancreatic Neoplasms, Stomach Neoplasms, Leukemia, Gliob…	FALSE	FALSE	-1	1
hsa-mir-181a-5p	BMPR2	mirna-gene	Predicted	Starbase		Pulmonary arterial hypertension, Hypertension, Pulmonary, Pulmonary Veno-Occlusive Disease, Hyperandrogenism	FALSE	FALSE	1	-1
hsa-mir-181a-5p	PPARA	mirna-gene	Predicted	Starbase		Hypertension, Reperfusion Injury, Diabetes Mellitus, Type 2, Obesity, Dyslipidemias, Fatty Liver, Hyperlipidemias, Insulin Resistance, Dermatitis, Atopic, Carcinoma, Neoplasms, Inflammation, Kidney Failure, Chronic, Liver Neoplasms, Encephalomyelitis, Autoimmune, Experimental, Hepatomegaly, Hypoglycemia, Kidney Diseases, Kidney Tubular Necrosis, Acute, Muscular Diseases, Abdominal obesity metabol…	FALSE	FALSE	1	-1
hsa-mir-181a-5p	PALM2	mirna-gene	Predicted	Starbase			FALSE	FALSE	1	-1
hsa-mir-181a-5p	MAT2A	mirna-gene	Predicted	Starbase			FALSE	FALSE	1	-1
hsa-mir-181a-5p	DUSP10	mirna-gene	Predicted	Starbase		Inflammation	FALSE	FALSE	1	-1
hsa-mir-181a-5p	GRB10	mirna-gene	Predicted	Starbase			FALSE	FALSE	1	-1
hsa-mir-181a-5p	MAMDC2	mirna-gene	Predicted	Starbase			FALSE	FALSE	-1	-1
hsa-mir-181a-5p	TNS1	mirna-gene	Predicted	Starbase			FALSE	FALSE	1	-1
hsa-mir-181a-5p	DOCK4	mirna-gene	Predicted	Starbase		Autistic Disorder	FALSE	FALSE	1	-1
hsa-mir-181a-5p	GPD2	mirna-gene	Predicted	Starbase		Diabetes Mellitus, Type 2, Diabetes Mellitus, Experimental, Methylmalonic acidemia, Osteoporosis	FALSE	FALSE	1	-1
hsa-mir-181a-5p	TMEM64	mirna-gene	Predicted	Starbase			FALSE	FALSE	1	-1
hsa-mir-181a-5p	NR6A1	mirna-gene	Predicted	Starbase			FALSE	FALSE	1	-1
hsa-mir-181a-5p	ANKRD52	mirna-gene	Predicted	Starbase			FALSE	FALSE	1	-1
hsa-mir-181a-5p	TGFBR1	mirna-gene	Predicted	Starbase		LOEYS-DIETZ SYNDROME, TYPE 1A, Loeys-Dietz Syndrome, Type 2A, Keratoacanthoma familial, Colorectal Neoplasms, Loeys-Dietz Syndrome, Skin Neoplasms, Aneurysm, Dissecting, Abortion, Spontaneous, Auditory Neuropathy, Autosomal Dominant, 1, Uremia	FALSE	FALSE	1	-1
hsa-mir-181a-5p	ATXN1	mirna-gene	Predicted	Starbase		Spinocerebellar Ataxias	FALSE	FALSE	1	-1
hsa-mir-181a-5p	PRTG	mirna-gene	Predicted	Starbase			FALSE	FALSE	1	-1
hsa-mir-181a-5p	FOS	mirna-gene	Experimental	mirtarbase		Hypertension, Reperfusion Injury, Carcinoma, Hepatocellular, Breast Neoplasms, Endometriosis, Seizures, Amphetamine-Related Disorders, Amyotrophic lateral sclerosis 1, Anxiety Disorders, Brain Injuries, Cocaine-Related Disorders, Epilepsy, Fibrous Dysplasia of Bone, Hemorrhage, Hyperkinesis, Infarction, Middle Cerebral Artery, Lung Neoplasms, Nervous System Diseases, Neurotoxicity Syndromes, Stat…	FALSE	FALSE	1	-1
hsa-mir-181a-5p	SLC25A37	mirna-gene	Predicted	Starbase		Anemia	FALSE	FALSE	1	-1
hsa-mir-181a-5p	CRIM1	mirna-gene	Predicted	Starbase			FALSE	FALSE	1	-1
hsa-mir-181a-5p	SLC19A2	mirna-gene	Predicted	Starbase		Thiamine responsive megaloblastic anemia syndrome	FALSE	FALSE	1	-1
hsa-mir-181a-5p	ADARB1	mirna-gene	Predicted	Starbase		Polycystic Ovary Syndrome	FALSE	FALSE	1	-1
hsa-mir-181a-5p	ONECUT2	mirna-gene	Predicted	Starbase			FALSE	FALSE	1	-1
hsa-mir-181a-5p	PBX3	mirna-gene	Predicted	Starbase			FALSE	FALSE	-1	-1
hsa-mir-181a-5p	CBX7	mirna-gene	Predicted	Starbase			FALSE	FALSE	1	-1
hsa-mir-181a-5p	ZBTB43	mirna-gene	Predicted	Starbase			FALSE	FALSE	1	-1
hsa-mir-181a-5p	MAP3K10	mirna-gene	Predicted	Starbase			FALSE	FALSE	1	-1
hsa-mir-181a-5p	FAM160A1	mirna-gene	Predicted	Starbase			FALSE	FALSE	-1	-1
hsa-mir-181b-5p	BMPR2	mirna-gene	Predicted	Starbase		Pulmonary arterial hypertension, Hypertension, Pulmonary, Pulmonary Veno-Occlusive Disease, Hyperandrogenism	FALSE	FALSE	1	-1
hsa-mir-181b-5p	MAMDC2	mirna-gene	Predicted	Starbase			FALSE	FALSE	-1	-1
hsa-mir-181b-5p	NR6A1	mirna-gene	Predicted	Starbase			FALSE	FALSE	1	-1
hsa-mir-181b-5p	ADARB1	mirna-gene	Predicted	Starbase		Polycystic Ovary Syndrome	FALSE	FALSE	1	-1
hsa-mir-181b-5p	ONECUT2	mirna-gene	Predicted	Starbase			FALSE	FALSE	1	-1
hsa-mir-181b-5p	PBX3	mirna-gene	Predicted	Starbase			FALSE	FALSE	-1	-1
hsa-mir-181b-5p	CBX7	mirna-gene	Experimental	mirtarbase			FALSE	FALSE	1	-1
hsa-mir-181b-5p	PPARA	mirna-gene	Predicted	Starbase		Hypertension, Reperfusion Injury, Diabetes Mellitus, Type 2, Obesity, Dyslipidemias, Fatty Liver, Hyperlipidemias, Insulin Resistance, Dermatitis, Atopic, Carcinoma, Neoplasms, Inflammation, Kidney Failure, Chronic, Liver Neoplasms, Encephalomyelitis, Autoimmune, Experimental, Hepatomegaly, Hypoglycemia, Kidney Diseases, Kidney Tubular Necrosis, Acute, Muscular Diseases, Abdominal obesity metabol…	FALSE	FALSE	1	-1
hsa-mir-181b-5p	ANKRD52	mirna-gene	Predicted	Starbase			FALSE	FALSE	1	-1
hsa-mir-181b-5p	TNS1	mirna-gene	Predicted	Starbase			FALSE	FALSE	1	-1
hsa-mir-181b-5p	CRIM1	mirna-gene	Predicted	Starbase			FALSE	FALSE	1	-1
hsa-mir-181b-5p	GPD2	mirna-gene	Predicted	Starbase		Diabetes Mellitus, Type 2, Diabetes Mellitus, Experimental, Methylmalonic acidemia, Osteoporosis	FALSE	FALSE	1	-1
hsa-mir-181b-5p	PALM2	mirna-gene	Predicted	Starbase			FALSE	FALSE	1	-1
hsa-mir-181b-5p	TMEM64	mirna-gene	Predicted	Starbase			FALSE	FALSE	1	-1
hsa-mir-181b-5p	SLC25A37	mirna-gene	Predicted	Starbase		Anemia	FALSE	FALSE	1	-1
hsa-mir-181b-5p	FOS	mirna-gene	Predicted	Starbase		Hypertension, Reperfusion Injury, Carcinoma, Hepatocellular, Breast Neoplasms, Endometriosis, Seizures, Amphetamine-Related Disorders, Amyotrophic lateral sclerosis 1, Anxiety Disorders, Brain Injuries, Cocaine-Related Disorders, Epilepsy, Fibrous Dysplasia of Bone, Hemorrhage, Hyperkinesis, Infarction, Middle Cerebral Artery, Lung Neoplasms, Nervous System Diseases, Neurotoxicity Syndromes, Stat…	FALSE	FALSE	1	-1
hsa-mir-181b-5p	DOCK4	mirna-gene	Predicted	Starbase		Autistic Disorder	FALSE	FALSE	1	-1
hsa-mir-181b-5p	DUSP10	mirna-gene	Predicted	Starbase		Inflammation	FALSE	FALSE	1	-1
hsa-mir-181b-5p	ATXN1	mirna-gene	Predicted	Starbase		Spinocerebellar Ataxias	FALSE	FALSE	1	-1
hsa-mir-181b-5p	FAM160A1	mirna-gene	Predicted	Starbase			FALSE	FALSE	-1	-1
hsa-mir-181b-5p	PRTG	mirna-gene	Predicted	Starbase			FALSE	FALSE	1	-1
hsa-mir-181b-5p	ZBTB43	mirna-gene	Predicted	Starbase			FALSE	FALSE	1	-1
hsa-mir-181b-5p	SLC19A2	mirna-gene	Predicted	Starbase		Thiamine responsive megaloblastic anemia syndrome	FALSE	FALSE	1	-1
hsa-mir-181b-5p	GRB10	mirna-gene	Predicted	Starbase			FALSE	FALSE	1	-1
hsa-mir-181b-5p	TGFBR1	mirna-gene	Predicted	Starbase		LOEYS-DIETZ SYNDROME, TYPE 1A, Loeys-Dietz Syndrome, Type 2A, Keratoacanthoma familial, Colorectal Neoplasms, Loeys-Dietz Syndrome, Skin Neoplasms, Aneurysm, Dissecting, Abortion, Spontaneous, Auditory Neuropathy, Autosomal Dominant, 1, Uremia	FALSE	FALSE	1	-1
hsa-mir-181b-5p	MAT2A	mirna-gene	Predicted	Starbase			FALSE	FALSE	1	-1
hsa-mir-181b-5p	MAP3K10	mirna-gene	Experimental	mirtarbase			FALSE	FALSE	1	-1
hsa-mir-181c-5p	TNS1	mirna-gene	Predicted	Starbase			FALSE	FALSE	1	-1
hsa-mir-181c-5p	PALM2	mirna-gene	Predicted	Starbase			FALSE	FALSE	1	-1
hsa-mir-181c-5p	PPARA	mirna-gene	Predicted	Starbase		Hypertension, Reperfusion Injury, Diabetes Mellitus, Type 2, Obesity, Dyslipidemias, Fatty Liver, Hyperlipidemias, Insulin Resistance, Dermatitis, Atopic, Carcinoma, Neoplasms, Inflammation, Kidney Failure, Chronic, Liver Neoplasms, Encephalomyelitis, Autoimmune, Experimental, Hepatomegaly, Hypoglycemia, Kidney Diseases, Kidney Tubular Necrosis, Acute, Muscular Diseases, Abdominal obesity metabol…	FALSE	FALSE	1	-1
hsa-mir-181c-5p	FOS	mirna-gene	Predicted	Starbase		Hypertension, Reperfusion Injury, Carcinoma, Hepatocellular, Breast Neoplasms, Endometriosis, Seizures, Amphetamine-Related Disorders, Amyotrophic lateral sclerosis 1, Anxiety Disorders, Brain Injuries, Cocaine-Related Disorders, Epilepsy, Fibrous Dysplasia of Bone, Hemorrhage, Hyperkinesis, Infarction, Middle Cerebral Artery, Lung Neoplasms, Nervous System Diseases, Neurotoxicity Syndromes, Stat…	FALSE	FALSE	1	-1
hsa-mir-181c-5p	PBX3	mirna-gene	Predicted	Starbase			FALSE	FALSE	-1	-1
hsa-mir-181c-5p	DOCK4	mirna-gene	Predicted	Starbase		Autistic Disorder	FALSE	FALSE	1	-1
hsa-mir-181c-5p	ZBTB43	mirna-gene	Predicted	Starbase			FALSE	FALSE	1	-1
hsa-mir-181c-5p	TGFBR1	mirna-gene	Predicted	Starbase		LOEYS-DIETZ SYNDROME, TYPE 1A, Loeys-Dietz Syndrome, Type 2A, Keratoacanthoma familial, Colorectal Neoplasms, Loeys-Dietz Syndrome, Skin Neoplasms, Aneurysm, Dissecting, Abortion, Spontaneous, Auditory Neuropathy, Autosomal Dominant, 1, Uremia	FALSE	FALSE	1	-1
hsa-mir-181c-5p	DUSP10	mirna-gene	Predicted	Starbase		Inflammation	FALSE	FALSE	1	-1
hsa-mir-181c-5p	FAM160A1	mirna-gene	Predicted	Starbase			FALSE	FALSE	-1	-1
hsa-mir-181c-5p	MAMDC2	mirna-gene	Predicted	Starbase			FALSE	FALSE	-1	-1
hsa-mir-181c-5p	ATXN1	mirna-gene	Predicted	Starbase		Spinocerebellar Ataxias	FALSE	FALSE	1	-1
hsa-mir-181c-5p	SLC19A2	mirna-gene	Predicted	Starbase		Thiamine responsive megaloblastic anemia syndrome	FALSE	FALSE	1	-1
hsa-mir-181c-5p	ANKRD52	mirna-gene	Predicted	Starbase			FALSE	FALSE	1	-1
hsa-mir-181c-5p	NR6A1	mirna-gene	Predicted	Starbase			FALSE	FALSE	1	-1
hsa-mir-181c-5p	CBX7	mirna-gene	Predicted	Starbase			FALSE	FALSE	1	-1
hsa-mir-181c-5p	GPD2	mirna-gene	Predicted	Starbase		Diabetes Mellitus, Type 2, Diabetes Mellitus, Experimental, Methylmalonic acidemia, Osteoporosis	FALSE	FALSE	1	-1
hsa-mir-181c-5p	MAP3K10	mirna-gene	Predicted	Starbase			FALSE	FALSE	1	-1
hsa-mir-181c-5p	ADARB1	mirna-gene	Predicted	Starbase		Polycystic Ovary Syndrome	FALSE	FALSE	1	-1
hsa-mir-181c-5p	TMEM64	mirna-gene	Predicted	Starbase			FALSE	FALSE	1	-1
hsa-mir-181c-5p	SLC25A37	mirna-gene	Predicted	Starbase		Anemia	FALSE	FALSE	1	-1
hsa-mir-181c-5p	GRB10	mirna-gene	Predicted	Starbase			FALSE	FALSE	1	-1
hsa-mir-181c-5p	MAT2A	mirna-gene	Predicted	Starbase			FALSE	FALSE	1	-1
hsa-mir-181c-5p	CRIM1	mirna-gene	Predicted	Starbase			FALSE	FALSE	1	-1
hsa-mir-181c-5p	BMPR2	mirna-gene	Experimental	mirtarbase		Pulmonary arterial hypertension, Hypertension, Pulmonary, Pulmonary Veno-Occlusive Disease, Hyperandrogenism	FALSE	FALSE	1	-1
hsa-mir-181c-5p	PRTG	mirna-gene	Predicted	Starbase			FALSE	FALSE	1	-1
hsa-mir-181c-5p	ONECUT2	mirna-gene	Predicted	Starbase			FALSE	FALSE	1	-1
hsa-mir-182-5p	SLC23A2	mirna-gene	Predicted	Starbase		Cholestasis	FALSE	FALSE	1	-1
hsa-mir-182-5p	NT5DC3	mirna-gene	Predicted	Starbase			FALSE	FALSE	1	-1
hsa-mir-182-5p	ATXN1	mirna-gene	Predicted	Starbase		Spinocerebellar Ataxias	FALSE	FALSE	1	-1
hsa-mir-182-5p	SAMD4A	mirna-gene	Predicted	Starbase		Substance-Related Disorders	FALSE	FALSE	1	-1
hsa-mir-182-5p	CDKN1A	mirna-gene	Experimental	mirtarbase		Colonic Neoplasms, Prostatic Neoplasms, Urinary Bladder Neoplasms, Lung Neoplasms, Papilloma, Stomach Neoplasms, Esophageal Squamous Cell Carcinoma, Carcinoma, Transitional Cell, Intestinal Neoplasms, HIV Infections, Kidney Diseases, Muscular Dystrophy, Facioscapulohumeral, Reperfusion Injury	FALSE	FALSE	1	-1
hsa-mir-182-5p	KIAA1549	mirna-gene	Predicted	Starbase			FALSE	FALSE	1	-1
hsa-mir-182-5p	CDC42BPA	mirna-gene	Predicted	Starbase			FALSE	FALSE	1	-1
hsa-mir-182-5p	PPP1R9A	mirna-gene	Predicted	Starbase			FALSE	FALSE	1	-1
hsa-mir-182-5p	EBF1	mirna-gene	Predicted	Starbase			FALSE	FALSE	-1	-1
hsa-mir-182-5p	DOCK4	mirna-gene	Predicted	Starbase		Autistic Disorder	FALSE	FALSE	1	-1
hsa-mir-182-5p	TNS1	mirna-gene	Predicted	Starbase			FALSE	FALSE	1	-1
hsa-mir-182-5p	FOXQ1	mirna-gene	Predicted	Starbase			FALSE	FALSE	-1	-1
hsa-mir-182-5p	PBX3	mirna-gene	Predicted	Starbase			FALSE	FALSE	-1	-1
hsa-mir-182-5p	ELMO1	mirna-gene	Predicted	Starbase		Adenocarcinoma Of Esophagus	FALSE	FALSE	-1	-1
hsa-mir-182-5p	SNAP23	mirna-gene	Predicted	Starbase		Myocardial Ischemia	FALSE	FALSE	1	-1
hsa-mir-182-5p	OSBPL2	mirna-gene	Predicted	Starbase			FALSE	FALSE	1	-1
hsa-mir-182-5p	RARG	mirna-gene	Experimental	mirtarbase		Cleft Palate, Musculoskeletal Abnormalities	FALSE	FALSE	1	-1
hsa-mir-190b	HGF	mirna-gene	Predicted	Starbase	Neuroblastoma	Carcinoma, Hepatocellular, Carcinoma, Squamous Cell, Liver Cirrhosis, Liver Neoplasms, Leukemia, Myeloid, Acute, Pulmonary Fibrosis, Liver Failure, Acute, Myocardial Ischemia, Cardiomyopathies, Neuroblastoma, Pancreatitis, Parkinson Disease, Vascular Diseases, Barrett Esophagus, Deafness, Autosomal Recessive 39, Liver Cirrhosis, Experimental, Liver Neoplasms, Experimental, Neoplasm Invasiveness, …	FALSE	FALSE	1	-1
hsa-mir-190b	OSBPL6	mirna-gene	Predicted	Starbase	Neuroblastoma	Peripheral Nervous System Diseases	FALSE	FALSE	1	-1
hsa-mir-196a-5p	PUM2	mirna-gene	Predicted	Starbase			FALSE	FALSE	1	-1
hsa-mir-196a-5p	LCOR	mirna-gene	Predicted	Starbase			FALSE	FALSE	1	-1
hsa-mir-196a-5p	ACER2	mirna-gene	Predicted	Starbase			FALSE	FALSE	1	-1
hsa-mir-196a-5p	POLR3D	mirna-gene	Predicted	Starbase			FALSE	FALSE	1	-1
hsa-mir-196a-5p	PBX3	mirna-gene	Predicted	Starbase			FALSE	FALSE	-1	-1
hsa-mir-200a-3p	SLC23A2	mirna-gene	Predicted	Starbase		Cholestasis	FALSE	FALSE	1	1
hsa-mir-200a-3p	MAP7D1	mirna-gene	Predicted	Starbase			FALSE	FALSE	-1	1
hsa-mir-200a-3p	TET1	mirna-gene	Predicted	Starbase			FALSE	FALSE	1	1
hsa-mir-200a-3p	ATXN1	mirna-gene	Predicted	Starbase		Spinocerebellar Ataxias	FALSE	FALSE	1	1
hsa-mir-200a-3p	LMO3	mirna-gene	Predicted	Starbase			FALSE	FALSE	-1	1
hsa-mir-200a-3p	ZEB1	mirna-gene	Experimental	mirtarbase		Corneal Dystrophy, Fuchs Endothelial, 6, Corneal Dystrophy, Posterior Polymorphous, 3, Breast Neoplasms, Cell Transformation, Neoplastic, Disease Progression, Myocardial Ischemia, Neoplasm Invasiveness	FALSE	FALSE	1	1
hsa-mir-200a-3p	ZFPM2	mirna-gene	Experimental	mirtarbase		Tetralogy of Fallot, Hernia, Diaphragmatic, Diaphragmatic Hernia 3	FALSE	FALSE	-1	1
hsa-mir-200a-3p	DOCK4	mirna-gene	Predicted	Starbase		Autistic Disorder	FALSE	FALSE	1	1
hsa-mir-200a-3p	WASF3	mirna-gene	Experimental	mirtarbase			FALSE	FALSE	-1	1
hsa-mir-200a-3p	TOP1	mirna-gene	Predicted	Starbase		Neoplasms, Drug Toxicity	FALSE	FALSE	-1	1
hsa-mir-200a-3p	STXBP1	mirna-gene	Predicted	Starbase		Epileptic Encephalopathy, Early Infantile, 4, Epilepsies, Myoclonic	FALSE	FALSE	-1	1
hsa-mir-204-5p	SOX4	mirna-gene	Experimental	mirtarbase		Carcinoma, Adenoid Cystic, Liver Neoplasms, Experimental, Salivary Gland Neoplasms	FALSE	FALSE	-1	1
hsa-mir-204-5p	CREB5	mirna-gene	Experimental	mirtarbase			FALSE	FALSE	1	1
hsa-mir-204-5p	MGAT3	mirna-gene	Predicted	Starbase			FALSE	FALSE	1	1
hsa-mir-204-5p	RPS6KA5	mirna-gene	Predicted	Starbase		Cocaine-Related Disorders	FALSE	FALSE	1	1
hsa-mir-204-5p	ATXN1	mirna-gene	Predicted	Starbase		Spinocerebellar Ataxias	FALSE	FALSE	1	1
hsa-mir-204-5p	TGFBR1	mirna-gene	Experimental	mirtarbase		LOEYS-DIETZ SYNDROME, TYPE 1A, Loeys-Dietz Syndrome, Type 2A, Keratoacanthoma familial, Colorectal Neoplasms, Loeys-Dietz Syndrome, Skin Neoplasms, Aneurysm, Dissecting, Abortion, Spontaneous, Auditory Neuropathy, Autosomal Dominant, 1, Uremia	FALSE	FALSE	1	1
hsa-mir-204-5p	SNX13	mirna-gene	Predicted	Starbase			FALSE	FALSE	1	1
hsa-mir-204-5p	IGF2R	mirna-gene	Predicted	Starbase		Carcinoma, Hepatocellular, Alzheimer Disease, Congenital diaphragmatic hernia, Lewy Body Disease, Lung Diseases, Parkinson Disease	FALSE	FALSE	1	1
hsa-mir-21	BMPR2	mirna-gene	Experimental	mirtarbase.adstudy	Brain Neoplasms, Brain Neoplasms, Breast Neoplasms, Breast Neoplasms, Breast Neoplasms, Breast Neoplasms, Breast Neoplasms, Cholangiocarcinoma, Colonic Neoplasms, Dermatitis, Atopic, Focal Epithelial Hyperplasia, Glioblastoma, Glioblastoma, Glioblastoma, Glioblastoma, Glioblastoma, Glioblastoma, Heart Diseases, Heart Failure, Lung Neoplasms, Lung Neoplasms, Lymphoma, Large B-Cell, Diffuse, Muscul…	Pulmonary arterial hypertension, Hypertension, Pulmonary, Pulmonary Veno-Occlusive Disease, Hyperandrogenism	FALSE	FALSE	1	1
hsa-mir-21	CDKN1A	mirna-gene	Experimental	mirrecords.adstudy	Brain Neoplasms, Brain Neoplasms, Breast Neoplasms, Breast Neoplasms, Breast Neoplasms, Breast Neoplasms, Breast Neoplasms, Cholangiocarcinoma, Colonic Neoplasms, Dermatitis, Atopic, Focal Epithelial Hyperplasia, Glioblastoma, Glioblastoma, Glioblastoma, Glioblastoma, Glioblastoma, Glioblastoma, Heart Diseases, Heart Failure, Lung Neoplasms, Lung Neoplasms, Lymphoma, Large B-Cell, Diffuse, Muscul…	Colonic Neoplasms, Prostatic Neoplasms, Urinary Bladder Neoplasms, Lung Neoplasms, Papilloma, Stomach Neoplasms, Esophageal Squamous Cell Carcinoma, Carcinoma, Transitional Cell, Intestinal Neoplasms, HIV Infections, Kidney Diseases, Muscular Dystrophy, Facioscapulohumeral, Reperfusion Injury	FALSE	FALSE	1	1
hsa-mir-21	TNFAIP3	mirna-gene	Experimental	mirtarbase.adstudy	Brain Neoplasms, Brain Neoplasms, Breast Neoplasms, Breast Neoplasms, Breast Neoplasms, Breast Neoplasms, Breast Neoplasms, Cholangiocarcinoma, Colonic Neoplasms, Dermatitis, Atopic, Focal Epithelial Hyperplasia, Glioblastoma, Glioblastoma, Glioblastoma, Glioblastoma, Glioblastoma, Glioblastoma, Heart Diseases, Heart Failure, Lung Neoplasms, Lung Neoplasms, Lymphoma, Large B-Cell, Diffuse, Muscul…	Lupus Erythematosus, Systemic, Arthritis, Rheumatoid, Psoriasis	FALSE	FALSE	1	1
hsa-mir-21	ISCU	mirna-gene	Experimental	mirtarbase.adstudy	Brain Neoplasms, Brain Neoplasms, Breast Neoplasms, Breast Neoplasms, Breast Neoplasms, Breast Neoplasms, Breast Neoplasms, Cholangiocarcinoma, Colonic Neoplasms, Dermatitis, Atopic, Focal Epithelial Hyperplasia, Glioblastoma, Glioblastoma, Glioblastoma, Glioblastoma, Glioblastoma, Glioblastoma, Heart Diseases, Heart Failure, Lung Neoplasms, Lung Neoplasms, Lymphoma, Large B-Cell, Diffuse, Muscul…	Myopathy with Lactic Acidosis, Hereditary	FALSE	FALSE	1	1
hsa-mir-21	ERBB2	mirna-gene	Experimental	mirtarbase.adstudy	Brain Neoplasms, Brain Neoplasms, Breast Neoplasms, Breast Neoplasms, Breast Neoplasms, Breast Neoplasms, Breast Neoplasms, Cholangiocarcinoma, Colonic Neoplasms, Dermatitis, Atopic, Focal Epithelial Hyperplasia, Glioblastoma, Glioblastoma, Glioblastoma, Glioblastoma, Glioblastoma, Glioblastoma, Heart Diseases, Heart Failure, Lung Neoplasms, Lung Neoplasms, Lymphoma, Large B-Cell, Diffuse, Muscul…	Breast Neoplasms, Mammary Neoplasms, Experimental, Neoplasm Metastasis, Adenocarcinoma, Ovarian Neoplasms, Prostatic Neoplasms, Lung Neoplasms, Stomach Neoplasms, Cholangiocarcinoma, Glioma, Medulloblastoma, Colonic Neoplasms, Esophageal Neoplasms, Carcinoma, Renal Cell, Lymphatic Metastasis, Papilloma, Disease Progression, Gastrointestinal Neoplasms, Mammary Neoplasms, Animal, Neoplasm Recurrenc…	FALSE	FALSE	1	1
hsa-mir-21	TGFBR3	mirna-gene	Experimental	mirtarbase.adstudy	Brain Neoplasms, Brain Neoplasms, Breast Neoplasms, Breast Neoplasms, Breast Neoplasms, Breast Neoplasms, Breast Neoplasms, Cholangiocarcinoma, Colonic Neoplasms, Dermatitis, Atopic, Focal Epithelial Hyperplasia, Glioblastoma, Glioblastoma, Glioblastoma, Glioblastoma, Glioblastoma, Glioblastoma, Heart Diseases, Heart Failure, Lung Neoplasms, Lung Neoplasms, Lymphoma, Large B-Cell, Diffuse, Muscul…		FALSE	FALSE	1	1
hsa-mir-21	HIPK3	mirna-gene	Experimental	mirrecords.adstudy	Brain Neoplasms, Brain Neoplasms, Breast Neoplasms, Breast Neoplasms, Breast Neoplasms, Breast Neoplasms, Breast Neoplasms, Cholangiocarcinoma, Colonic Neoplasms, Dermatitis, Atopic, Focal Epithelial Hyperplasia, Glioblastoma, Glioblastoma, Glioblastoma, Glioblastoma, Glioblastoma, Glioblastoma, Heart Diseases, Heart Failure, Lung Neoplasms, Lung Neoplasms, Lymphoma, Large B-Cell, Diffuse, Muscul…		FALSE	FALSE	1	1
hsa-mir-21	PPARA	mirna-gene	Experimental	mirRecord	Brain Neoplasms, Brain Neoplasms, Breast Neoplasms, Breast Neoplasms, Breast Neoplasms, Breast Neoplasms, Breast Neoplasms, Cholangiocarcinoma, Colonic Neoplasms, Dermatitis, Atopic, Focal Epithelial Hyperplasia, Glioblastoma, Glioblastoma, Glioblastoma, Glioblastoma, Glioblastoma, Glioblastoma, Heart Diseases, Heart Failure, Lung Neoplasms, Lung Neoplasms, Lymphoma, Large B-Cell, Diffuse, Muscul…	Hypertension, Reperfusion Injury, Diabetes Mellitus, Type 2, Obesity, Dyslipidemias, Fatty Liver, Hyperlipidemias, Insulin Resistance, Dermatitis, Atopic, Carcinoma, Neoplasms, Inflammation, Kidney Failure, Chronic, Liver Neoplasms, Encephalomyelitis, Autoimmune, Experimental, Hepatomegaly, Hypoglycemia, Kidney Diseases, Kidney Tubular Necrosis, Acute, Muscular Diseases, Abdominal obesity metabol…	FALSE	FALSE	1	1
hsa-mir-214	hsa-mir-29a	mirna-mirna	Predicted	Pmmr	Cardiomyopathy, Hypertrophic, Cardiomyopathy, Hypertrophic, Lung Neoplasms, Muscular Disorders, Atrophic, Pancreatic Neoplasms, Prostatic Neoplasms, Stomach Neoplasms, Retinal Neovascularization, Retinal Neovascularization, Ovarian Neoplasms, Breast Neoplasms, Melanoma, Carcinoma, Stomach Neoplasms, SARS Virus, Hepatoblastoma, Adrenal Cortex Neoplasms, Neoplasms, Ovarian Neoplasms, Melanoma, Repe…	Acquired Immunodeficiency Syndrome, Heart Failure, Leukemia, Lymphocytic, Chronic, B-Cell, Lung Neoplasms, Lung Neoplasms, Neoplasms, Schizophrenia, Lymphoma, B-Cell, Alzheimer Disease, Precursor Cell Lymphoblastic Leukemia-Lymphoma, Acquired Immunodeficiency Syndrome, Breast Neoplasms, Ovarian Neoplasms, Rhabdomyosarcoma, Neoplasms, Alzheimer Disease, Endomyocardial Fibrosis, Breast Neoplasms, M…	FALSE	FALSE	1	-1
hsa-mir-214	hsa-let-7f	mirna-mirna	Predicted	Pmmr	Cardiomyopathy, Hypertrophic, Cardiomyopathy, Hypertrophic, Lung Neoplasms, Muscular Disorders, Atrophic, Pancreatic Neoplasms, Prostatic Neoplasms, Stomach Neoplasms, Retinal Neovascularization, Retinal Neovascularization, Ovarian Neoplasms, Breast Neoplasms, Melanoma, Carcinoma, Stomach Neoplasms, SARS Virus, Hepatoblastoma, Adrenal Cortex Neoplasms, Neoplasms, Ovarian Neoplasms, Melanoma, Repe…		FALSE	FALSE	-1	-1
hsa-mir-214	hsa-mir-103	mirna-mirna	Predicted	Pmmr	Cardiomyopathy, Hypertrophic, Cardiomyopathy, Hypertrophic, Lung Neoplasms, Muscular Disorders, Atrophic, Pancreatic Neoplasms, Prostatic Neoplasms, Stomach Neoplasms, Retinal Neovascularization, Retinal Neovascularization, Ovarian Neoplasms, Breast Neoplasms, Melanoma, Carcinoma, Stomach Neoplasms, SARS Virus, Hepatoblastoma, Adrenal Cortex Neoplasms, Neoplasms, Ovarian Neoplasms, Melanoma, Repe…		FALSE	FALSE	-1	-1
hsa-mir-214	hsa-mir-135a	mirna-mirna	Predicted	Pmmr	Cardiomyopathy, Hypertrophic, Cardiomyopathy, Hypertrophic, Lung Neoplasms, Muscular Disorders, Atrophic, Pancreatic Neoplasms, Prostatic Neoplasms, Stomach Neoplasms, Retinal Neovascularization, Retinal Neovascularization, Ovarian Neoplasms, Breast Neoplasms, Melanoma, Carcinoma, Stomach Neoplasms, SARS Virus, Hepatoblastoma, Adrenal Cortex Neoplasms, Neoplasms, Ovarian Neoplasms, Melanoma, Repe…		FALSE	FALSE	1	-1
hsa-mir-214	hsa-mir-196b	mirna-mirna	Predicted	Pmmr	Cardiomyopathy, Hypertrophic, Cardiomyopathy, Hypertrophic, Lung Neoplasms, Muscular Disorders, Atrophic, Pancreatic Neoplasms, Prostatic Neoplasms, Stomach Neoplasms, Retinal Neovascularization, Retinal Neovascularization, Ovarian Neoplasms, Breast Neoplasms, Melanoma, Carcinoma, Stomach Neoplasms, SARS Virus, Hepatoblastoma, Adrenal Cortex Neoplasms, Neoplasms, Ovarian Neoplasms, Melanoma, Repe…	Neoplasms, Endometriosis, Hepatitis C, Leukemia, Neutropenia, Leukemia, Myeloid, Acute, Leukemia, Myeloid, Acute, Leukemia, Lymphocytic, Chronic, B-Cell, Adenoviridae Infections, Prostatic Neoplasms, Crohn Disease, Urinary Bladder Neoplasms, Hepatitis C, Leukemia, Myeloid, Acute, Glioblastoma, Precursor Cell Lymphoblastic Leukemia-Lymphoma, Pancreatic Neoplasms, Stomach Neoplasms, Leukemia, Gliob…	FALSE	FALSE	-1	-1
hsa-mir-214	hsa-mir-21	mirna-mirna	Predicted	Pmmr	Cardiomyopathy, Hypertrophic, Cardiomyopathy, Hypertrophic, Lung Neoplasms, Muscular Disorders, Atrophic, Pancreatic Neoplasms, Prostatic Neoplasms, Stomach Neoplasms, Retinal Neovascularization, Retinal Neovascularization, Ovarian Neoplasms, Breast Neoplasms, Melanoma, Carcinoma, Stomach Neoplasms, SARS Virus, Hepatoblastoma, Adrenal Cortex Neoplasms, Neoplasms, Ovarian Neoplasms, Melanoma, Repe…	Brain Neoplasms, Brain Neoplasms, Breast Neoplasms, Breast Neoplasms, Breast Neoplasms, Breast Neoplasms, Breast Neoplasms, Cholangiocarcinoma, Colonic Neoplasms, Dermatitis, Atopic, Focal Epithelial Hyperplasia, Glioblastoma, Glioblastoma, Glioblastoma, Glioblastoma, Glioblastoma, Glioblastoma, Heart Diseases, Heart Failure, Lung Neoplasms, Lung Neoplasms, Lymphoma, Large B-Cell, Diffuse, Muscul…	FALSE	FALSE	1	-1
hsa-mir-216a	CD44	mirna-gene	Experimental	mirtarbase.adstudy	Lung Neoplasms, Melanoma, Fatty Liver, Pancreatic Neoplasms, Carcinoma, Hepatocellular, Heart Failure, Pancreatic Neoplasms, Pancreatic Neoplasms, Carcinoma, Hepatocellular	Stomach Neoplasms, Leukemia, Promyelocytic, Acute, Pancreatic Neoplasms, Skin Diseases, Acute Kidney Injury, Arsenic Poisoning, Mammary Neoplasms, Experimental, Nerve Degeneration, Peripheral Nervous System Diseases, Vitiligo	FALSE	FALSE	1	1
hsa-mir-221-3p	MAT2A	mirna-gene	Predicted	Starbase			FALSE	FALSE	1	1
hsa-mir-221-3p	FOS	mirna-gene	Experimental	mirtarbase		Hypertension, Reperfusion Injury, Carcinoma, Hepatocellular, Breast Neoplasms, Endometriosis, Seizures, Amphetamine-Related Disorders, Amyotrophic lateral sclerosis 1, Anxiety Disorders, Brain Injuries, Cocaine-Related Disorders, Epilepsy, Fibrous Dysplasia of Bone, Hemorrhage, Hyperkinesis, Infarction, Middle Cerebral Artery, Lung Neoplasms, Nervous System Diseases, Neurotoxicity Syndromes, Stat…	FALSE	FALSE	1	1
hsa-mir-221-3p	ANKRD52	mirna-gene	Predicted	Starbase			FALSE	FALSE	1	1
hsa-mir-221-3p	FERMT2	mirna-gene	Predicted	Starbase		Urinary Bladder Neoplasms	FALSE	FALSE	1	1
hsa-mir-221-3p	MAP3K10	mirna-gene	Predicted	Starbase			FALSE	FALSE	1	1
hsa-mir-221-3p	ATXN1	mirna-gene	Predicted	Starbase		Spinocerebellar Ataxias	FALSE	FALSE	1	1
hsa-mir-221-3p	TP53	mirna-gene	Experimental	mirtarbase		Adenocarcinoma, Carcinoma, Hepatocellular, Carcinoma, Squamous Cell, Small Cell Lung Carcinoma, Carcinoma, Breast Neoplasms, Ischemia, Li-Fraumeni Syndrome, Sarcoma family syndrome of Li and Fraumeni, Glioma, Neoplasm Metastasis, Melanoma, Stomach Neoplasms, Sarcoma, Lung Neoplasms, Colorectal Neoplasms, Leukemia, Lymphocytic, Chronic, B-Cell, Carcinoma, Non-Small-Cell Lung, Colonic Neoplasms, Ad…	FALSE	FALSE	1	1
hsa-mir-221-3p	GRB10	mirna-gene	Predicted	Starbase			FALSE	FALSE	1	1
hsa-mir-221-3p	SLITRK5	mirna-gene	Predicted	Starbase		Obsessive-Compulsive Disorder	FALSE	FALSE	-1	1
hsa-mir-221-3p	RIMS3	mirna-gene	Predicted	Starbase			FALSE	FALSE	1	1
hsa-mir-221-3p	SOCS3	mirna-gene	Predicted	Starbase		Carcinoma, Hepatocellular, Atherosclerosis, Dermatitis, Atopic, 4, Endometrial Neoplasms, Liver Diseases, Myocardial Ischemia	FALSE	FALSE	1	1
hsa-mir-221-3p	PBX3	mirna-gene	Predicted	Starbase			FALSE	FALSE	-1	1
hsa-mir-27a-3p	MAN2A1	mirna-gene	Predicted	Starbase			FALSE	FALSE	1	1
hsa-mir-27a-3p	BBX	mirna-gene	Predicted	Starbase			FALSE	FALSE	1	1
hsa-mir-27a-3p	PAPPA	mirna-gene	Predicted	Starbase		Acute Coronary Syndrome, Myocardial Infarction, Angina, Unstable, Endometriosis, Coronary Artery Disease, Infertility, Female	FALSE	FALSE	1	1
hsa-mir-27a-3p	HIVEP2	mirna-gene	Predicted	Starbase		Myocardial Ischemia	FALSE	FALSE	1	1
hsa-mir-27a-3p	CCNG1	mirna-gene	Predicted	Starbase		Lung Neoplasms	FALSE	FALSE	1	1
hsa-mir-27a-3p	ELMO1	mirna-gene	Predicted	Starbase		Adenocarcinoma Of Esophagus	FALSE	FALSE	-1	1
hsa-mir-27a-3p	FN1	mirna-gene	Predicted	Starbase		Glomerulopathy with fibronectin deposits, Carcinoma, Diabetes Mellitus, Crohn Disease, Glioblastoma, Hypertension, Aortic Valve Insufficiency, Glomerulosclerosis, Focal Segmental, Abortion, Spontaneous, Hypertrophy, Left Ventricular, Mammary Neoplasms, Animal, Mammary Neoplasms, Experimental	FALSE	FALSE	1	1
hsa-mir-27a-3p	GPD2	mirna-gene	Predicted	Starbase		Diabetes Mellitus, Type 2, Diabetes Mellitus, Experimental, Methylmalonic acidemia, Osteoporosis	FALSE	FALSE	1	1
hsa-mir-27a-3p	ITGA2	mirna-gene	Predicted	Starbase		Endometriosis, Gliosis, Hyperalgesia, Retinal Vein Occlusion	FALSE	FALSE	1	1
hsa-mir-27a-3p	PPARA	mirna-gene	Predicted	Starbase		Hypertension, Reperfusion Injury, Diabetes Mellitus, Type 2, Obesity, Dyslipidemias, Fatty Liver, Hyperlipidemias, Insulin Resistance, Dermatitis, Atopic, Carcinoma, Neoplasms, Inflammation, Kidney Failure, Chronic, Liver Neoplasms, Encephalomyelitis, Autoimmune, Experimental, Hepatomegaly, Hypoglycemia, Kidney Diseases, Kidney Tubular Necrosis, Acute, Muscular Diseases, Abdominal obesity metabol…	FALSE	FALSE	1	1
hsa-mir-27a-3p	PRKAA2	mirna-gene	Predicted	Starbase		Cardiomyopathies, Cardiomegaly, Glucose Intolerance, Insulin Resistance, Stroke	FALSE	FALSE	1	1
hsa-mir-27a-3p	PDE8B	mirna-gene	Predicted	Starbase		Adrenal Hyperplasia, Congenital, Basal Ganglia Diseases, Muscle Rigidity, Striatal Degeneration, Autosomal Dominant, PIGMENTED NODULAR ADRENOCORTICAL DISEASE, PRIMARY, 3, Dysarthria, Neurodegenerative Diseases	FALSE	FALSE	1	1
hsa-mir-27a-3p	LCOR	mirna-gene	Predicted	Starbase			FALSE	FALSE	1	1
hsa-mir-27a-3p	RPS6KA5	mirna-gene	Predicted	Starbase		Cocaine-Related Disorders	FALSE	FALSE	1	1
hsa-mir-27a-3p	PDE10A	mirna-gene	Predicted	Starbase			FALSE	FALSE	1	1
hsa-mir-27a-3p	TGFBR3	mirna-gene	Predicted	Starbase			FALSE	FALSE	1	1
hsa-mir-27a-3p	SESN2	mirna-gene	Predicted	Starbase			FALSE	FALSE	1	1
hsa-mir-27a-3p	RXRA	mirna-gene	Predicted	Starbase		Prostatic Neoplasms, Amyotrophic lateral sclerosis 1, Sciatic Neuropathy	FALSE	FALSE	1	1
hsa-mir-27a-3p	LIFR	mirna-gene	Predicted	Starbase		Stuve-Wiedemann syndrome, Polycystic Ovary Syndrome, Prostatic Neoplasms	FALSE	FALSE	1	1
hsa-mir-27a-3p	TGFBR1	mirna-gene	Predicted	Starbase		LOEYS-DIETZ SYNDROME, TYPE 1A, Loeys-Dietz Syndrome, Type 2A, Keratoacanthoma familial, Colorectal Neoplasms, Loeys-Dietz Syndrome, Skin Neoplasms, Aneurysm, Dissecting, Abortion, Spontaneous, Auditory Neuropathy, Autosomal Dominant, 1, Uremia	FALSE	FALSE	1	1
hsa-mir-27a-3p	MAGI3	mirna-gene	Predicted	Starbase			FALSE	FALSE	1	1
hsa-mir-27a-3p	ONECUT2	mirna-gene	Predicted	Starbase			FALSE	FALSE	1	1
hsa-mir-27a-3p	BCL3	mirna-gene	Predicted	Starbase			FALSE	FALSE	1	1
hsa-mir-27a-3p	ADORA2B	mirna-gene	Predicted	Starbase			FALSE	FALSE	1	1
hsa-mir-27a-3p	CACNA1A	mirna-gene	Predicted	Starbase		Hemiplegic migraine, familial type 1, Episodic ataxia with nystagmus, SPINOCEREBELLAR ATAXIA 6, Spinocerebellar Ataxias, Ataxia, Epilepsy, Absence	FALSE	FALSE	1	1
hsa-mir-27b-3p	ITGA2	mirna-gene	Predicted	Starbase		Endometriosis, Gliosis, Hyperalgesia, Retinal Vein Occlusion	FALSE	FALSE	1	1
hsa-mir-27b-3p	ELMO1	mirna-gene	Predicted	Starbase		Adenocarcinoma Of Esophagus	FALSE	FALSE	-1	1
hsa-mir-27b-3p	PPARA	mirna-gene	Predicted	Starbase		Hypertension, Reperfusion Injury, Diabetes Mellitus, Type 2, Obesity, Dyslipidemias, Fatty Liver, Hyperlipidemias, Insulin Resistance, Dermatitis, Atopic, Carcinoma, Neoplasms, Inflammation, Kidney Failure, Chronic, Liver Neoplasms, Encephalomyelitis, Autoimmune, Experimental, Hepatomegaly, Hypoglycemia, Kidney Diseases, Kidney Tubular Necrosis, Acute, Muscular Diseases, Abdominal obesity metabol…	FALSE	FALSE	1	1
hsa-mir-27b-3p	CCNG1	mirna-gene	Predicted	Starbase		Lung Neoplasms	FALSE	FALSE	1	1
hsa-mir-27b-3p	TGFBR1	mirna-gene	Predicted	Starbase		LOEYS-DIETZ SYNDROME, TYPE 1A, Loeys-Dietz Syndrome, Type 2A, Keratoacanthoma familial, Colorectal Neoplasms, Loeys-Dietz Syndrome, Skin Neoplasms, Aneurysm, Dissecting, Abortion, Spontaneous, Auditory Neuropathy, Autosomal Dominant, 1, Uremia	FALSE	FALSE	1	1
hsa-mir-27b-3p	PAPPA	mirna-gene	Predicted	Starbase		Acute Coronary Syndrome, Myocardial Infarction, Angina, Unstable, Endometriosis, Coronary Artery Disease, Infertility, Female	FALSE	FALSE	1	1
hsa-mir-27b-3p	PDE10A	mirna-gene	Predicted	Starbase			FALSE	FALSE	1	1
hsa-mir-27b-3p	NFAT5	mirna-gene	Predicted	Starbase			FALSE	FALSE	1	1
hsa-mir-27b-3p	BBX	mirna-gene	Predicted	Starbase			FALSE	FALSE	1	1
hsa-mir-27b-3p	MAN2A1	mirna-gene	Predicted	Starbase			FALSE	FALSE	1	1
hsa-mir-27b-3p	RXRA	mirna-gene	Predicted	Starbase		Prostatic Neoplasms, Amyotrophic lateral sclerosis 1, Sciatic Neuropathy	FALSE	FALSE	1	1
hsa-mir-27b-3p	SESN2	mirna-gene	Predicted	Starbase			FALSE	FALSE	1	1
hsa-mir-27b-3p	LIFR	mirna-gene	Predicted	Starbase		Stuve-Wiedemann syndrome, Polycystic Ovary Syndrome, Prostatic Neoplasms	FALSE	FALSE	1	1
hsa-mir-27b-3p	PDE8B	mirna-gene	Predicted	Starbase		Adrenal Hyperplasia, Congenital, Basal Ganglia Diseases, Muscle Rigidity, Striatal Degeneration, Autosomal Dominant, PIGMENTED NODULAR ADRENOCORTICAL DISEASE, PRIMARY, 3, Dysarthria, Neurodegenerative Diseases	FALSE	FALSE	1	1
hsa-mir-27b-3p	BCL3	mirna-gene	Predicted	Starbase			FALSE	FALSE	1	1
hsa-mir-27b-3p	LCOR	mirna-gene	Predicted	Starbase			FALSE	FALSE	1	1
hsa-mir-27b-3p	CACNA1A	mirna-gene	Predicted	Starbase		Hemiplegic migraine, familial type 1, Episodic ataxia with nystagmus, SPINOCEREBELLAR ATAXIA 6, Spinocerebellar Ataxias, Ataxia, Epilepsy, Absence	FALSE	FALSE	1	1
hsa-mir-27b-3p	RPS6KA5	mirna-gene	Predicted	Starbase		Cocaine-Related Disorders	FALSE	FALSE	1	1
hsa-mir-27b-3p	VDR	mirna-gene	Experimental	mirtarbase		Vitamin D-Dependent Rickets, Type 2A, Osteoporosis, Rickets, Prostatic Neoplasms, Hypertension, Vitamin D Deficiency, Neoplasms, Alopecia, Uremia, Carcinoma, Transitional Cell, Epilepsy, Temporal Lobe, Genetic Diseases, Inborn, Leukemia, Lymphocytic, Chronic, B-Cell	FALSE	FALSE	1	1
hsa-mir-27b-3p	HIVEP2	mirna-gene	Predicted	Starbase		Myocardial Ischemia	FALSE	FALSE	1	1
hsa-mir-27b-3p	MAGI3	mirna-gene	Predicted	Starbase			FALSE	FALSE	1	1
hsa-mir-27b-3p	ADORA2B	mirna-gene	Experimental	mirtarbase			FALSE	FALSE	1	1
hsa-mir-27b-3p	ONECUT2	mirna-gene	Predicted	Starbase			FALSE	FALSE	1	1
hsa-mir-27b-3p	TGFBR3	mirna-gene	Predicted	Starbase			FALSE	FALSE	1	1
hsa-mir-27b-3p	MMP13	mirna-gene	Experimental	mirtarbase		Spondyloepimetaphyseal Dysplasia, Missouri Type, Liver Cirrhosis, Experimental, Craniofacial Abnormalities, Prostatic Neoplasms	FALSE	FALSE	1	1
hsa-mir-27b-3p	FN1	mirna-gene	Predicted	Starbase		Glomerulopathy with fibronectin deposits, Carcinoma, Diabetes Mellitus, Crohn Disease, Glioblastoma, Hypertension, Aortic Valve Insufficiency, Glomerulosclerosis, Focal Segmental, Abortion, Spontaneous, Hypertrophy, Left Ventricular, Mammary Neoplasms, Animal, Mammary Neoplasms, Experimental	FALSE	FALSE	1	1
hsa-mir-27b-3p	PRKAA2	mirna-gene	Predicted	Starbase		Cardiomyopathies, Cardiomegaly, Glucose Intolerance, Insulin Resistance, Stroke	FALSE	FALSE	1	1
hsa-mir-27b-3p	GPD2	mirna-gene	Predicted	Starbase		Diabetes Mellitus, Type 2, Diabetes Mellitus, Experimental, Methylmalonic acidemia, Osteoporosis	FALSE	FALSE	1	1
hsa-mir-29a	TET1	mirna-gene	Experimental	mirtarbase.adstudy	Acquired Immunodeficiency Syndrome, Heart Failure, Leukemia, Lymphocytic, Chronic, B-Cell, Lung Neoplasms, Lung Neoplasms, Neoplasms, Schizophrenia, Lymphoma, B-Cell, Alzheimer Disease, Precursor Cell Lymphoblastic Leukemia-Lymphoma, Acquired Immunodeficiency Syndrome, Breast Neoplasms, Ovarian Neoplasms, Rhabdomyosarcoma, Neoplasms, Alzheimer Disease, Endomyocardial Fibrosis, Breast Neoplasms, M…		FALSE	FALSE	1	1
hsa-mir-29a	DNMT3A	mirna-gene	Experimental	mirtarbase.adstudy	Acquired Immunodeficiency Syndrome, Heart Failure, Leukemia, Lymphocytic, Chronic, B-Cell, Lung Neoplasms, Lung Neoplasms, Neoplasms, Schizophrenia, Lymphoma, B-Cell, Alzheimer Disease, Precursor Cell Lymphoblastic Leukemia-Lymphoma, Acquired Immunodeficiency Syndrome, Breast Neoplasms, Ovarian Neoplasms, Rhabdomyosarcoma, Neoplasms, Alzheimer Disease, Endomyocardial Fibrosis, Breast Neoplasms, M…	Crohn Disease, Lung Neoplasms, Leukemia, Monocytic, Acute	FALSE	FALSE	1	1
hsa-mir-301a	hsa-mir-129-5p	mirna-mirna	Predicted	Pmmr	Salivary Gland Neoplasms, Adrenocortical Carcinoma, Lung Neoplasms, Lung Neoplasms, Breast Neoplasms, Parkinson Disease, Periodontitis, Carcinoma, Hepatocellular, Demyelinating Diseases, Prostatic Neoplasms, Stomach Neoplasms, Colorectal Neoplasms, Diabetes Mellitus		FALSE	FALSE	-1	1
hsa-mir-301a	hsa-let-7f	mirna-mirna	Predicted	Pmmr	Salivary Gland Neoplasms, Adrenocortical Carcinoma, Lung Neoplasms, Lung Neoplasms, Breast Neoplasms, Parkinson Disease, Periodontitis, Carcinoma, Hepatocellular, Demyelinating Diseases, Prostatic Neoplasms, Stomach Neoplasms, Colorectal Neoplasms, Diabetes Mellitus		FALSE	FALSE	-1	1
hsa-mir-301a	hsa-mir-196b	mirna-mirna	Predicted	Pmmr	Salivary Gland Neoplasms, Adrenocortical Carcinoma, Lung Neoplasms, Lung Neoplasms, Breast Neoplasms, Parkinson Disease, Periodontitis, Carcinoma, Hepatocellular, Demyelinating Diseases, Prostatic Neoplasms, Stomach Neoplasms, Colorectal Neoplasms, Diabetes Mellitus	Neoplasms, Endometriosis, Hepatitis C, Leukemia, Neutropenia, Leukemia, Myeloid, Acute, Leukemia, Myeloid, Acute, Leukemia, Lymphocytic, Chronic, B-Cell, Adenoviridae Infections, Prostatic Neoplasms, Crohn Disease, Urinary Bladder Neoplasms, Hepatitis C, Leukemia, Myeloid, Acute, Glioblastoma, Precursor Cell Lymphoblastic Leukemia-Lymphoma, Pancreatic Neoplasms, Stomach Neoplasms, Leukemia, Gliob…	FALSE	FALSE	-1	1
hsa-mir-301a	SERPINE1	mirna-gene	Experimental	mirtarbase.adstudy	Salivary Gland Neoplasms, Adrenocortical Carcinoma, Lung Neoplasms, Lung Neoplasms, Breast Neoplasms, Parkinson Disease, Periodontitis, Carcinoma, Hepatocellular, Demyelinating Diseases, Prostatic Neoplasms, Stomach Neoplasms, Colorectal Neoplasms, Diabetes Mellitus	Diabetic Nephropathies, Pre-Eclampsia, Thrombosis, Atherosclerosis, Kidney Failure, Chronic, Stomach Neoplasms, Fatty Liver, Prostatic Neoplasms, Liver Neoplasms, Autistic Disorder, Behcet Syndrome, Glomerulosclerosis, Focal Segmental, Nephrotic Syndrome, Cholestasis, Diabetes Mellitus, Experimental, Nervous System Diseases, Plasminogen Activator Inhibitor-1 Deficiency	FALSE	FALSE	1	1
hsa-mir-30e-5p	STXBP1	mirna-gene	Predicted	Starbase		Epileptic Encephalopathy, Early Infantile, 4, Epilepsies, Myoclonic	FALSE	FALSE	-1	1
hsa-mir-30e-5p	PPP1R14C	mirna-gene	Predicted	Starbase			FALSE	FALSE	-1	1
hsa-mir-30e-5p	LIFR	mirna-gene	Predicted	Starbase		Stuve-Wiedemann syndrome, Polycystic Ovary Syndrome, Prostatic Neoplasms	FALSE	FALSE	1	1
hsa-mir-30e-5p	MYO5A	mirna-gene	Predicted	Starbase		Griscelli syndrome type 1, Peripheral Nervous System Diseases	FALSE	FALSE	1	1
hsa-mir-30e-5p	NFAT5	mirna-gene	Predicted	Starbase			FALSE	FALSE	1	1
hsa-mir-30e-5p	MAT2A	mirna-gene	Predicted	Starbase			FALSE	FALSE	1	1
hsa-mir-30e-5p	RARG	mirna-gene	Predicted	Starbase		Cleft Palate, Musculoskeletal Abnormalities	FALSE	FALSE	1	1
hsa-mir-30e-5p	PLXNA2	mirna-gene	Predicted	Starbase		Schizophrenia	FALSE	FALSE	1	1
hsa-mir-30e-5p	GRB10	mirna-gene	Predicted	Starbase			FALSE	FALSE	1	1
hsa-mir-30e-5p	SH3PXD2A	mirna-gene	Predicted	Starbase			FALSE	FALSE	1	1
hsa-mir-30e-5p	PALM2	mirna-gene	Predicted	Starbase			FALSE	FALSE	1	1
hsa-mir-30e-5p	SERPINE1	mirna-gene	Predicted	Starbase		Diabetic Nephropathies, Pre-Eclampsia, Thrombosis, Atherosclerosis, Kidney Failure, Chronic, Stomach Neoplasms, Fatty Liver, Prostatic Neoplasms, Liver Neoplasms, Autistic Disorder, Behcet Syndrome, Glomerulosclerosis, Focal Segmental, Nephrotic Syndrome, Cholestasis, Diabetes Mellitus, Experimental, Nervous System Diseases, Plasminogen Activator Inhibitor-1 Deficiency	FALSE	FALSE	1	1
hsa-mir-30e-5p	PDE4D	mirna-gene	Predicted	Starbase		Stroke, Asthma, Amphetamine-Related Disorders, Prostatic Neoplasms	FALSE	FALSE	1	1
hsa-mir-30e-5p	ARID4B	mirna-gene	Predicted	Starbase		Carcinoma, Adenoid Cystic	FALSE	FALSE	1	1
hsa-mir-30e-5p	GLCE	mirna-gene	Predicted	Starbase			FALSE	FALSE	-1	1
hsa-mir-30e-5p	KIAA1549	mirna-gene	Predicted	Starbase			FALSE	FALSE	1	1
hsa-mir-30e-5p	SOCS3	mirna-gene	Predicted	Starbase		Carcinoma, Hepatocellular, Atherosclerosis, Dermatitis, Atopic, 4, Endometrial Neoplasms, Liver Diseases, Myocardial Ischemia	FALSE	FALSE	1	1
hsa-mir-30e-5p	SOX4	mirna-gene	Predicted	Starbase		Carcinoma, Adenoid Cystic, Liver Neoplasms, Experimental, Salivary Gland Neoplasms	FALSE	FALSE	-1	1
hsa-mir-30e-5p	CCDC120	mirna-gene	Predicted	Starbase			FALSE	FALSE	1	1
hsa-mir-31	hsa-mir-21	mirna-mirna	Predicted	Pmmr	Retinal Neovascularization, Retinal Neovascularization, Colorectal Neoplasms, Colorectal Neoplasms, Stomach Neoplasms, Medulloblastoma, Lung Neoplasms, Mouth Neoplasms, Carcinoma, Myocardial Infarction, Neoplasms, Ovarian Neoplasms, Schistosomiasis, Carcinoma, Leiomyosarcoma, Breast Neoplasms, Mouth Neoplasms, Adenocarcinoma, Mesothelioma, Neoplasms, Laryngeal Neoplasms, Muscular Dystrophy, Duche…	Brain Neoplasms, Brain Neoplasms, Breast Neoplasms, Breast Neoplasms, Breast Neoplasms, Breast Neoplasms, Breast Neoplasms, Cholangiocarcinoma, Colonic Neoplasms, Dermatitis, Atopic, Focal Epithelial Hyperplasia, Glioblastoma, Glioblastoma, Glioblastoma, Glioblastoma, Glioblastoma, Glioblastoma, Heart Diseases, Heart Failure, Lung Neoplasms, Lung Neoplasms, Lymphoma, Large B-Cell, Diffuse, Muscul…	FALSE	FALSE	1	1
hsa-mir-31	hsa-mir-196b	mirna-mirna	Predicted	Pmmr	Retinal Neovascularization, Retinal Neovascularization, Colorectal Neoplasms, Colorectal Neoplasms, Stomach Neoplasms, Medulloblastoma, Lung Neoplasms, Mouth Neoplasms, Carcinoma, Myocardial Infarction, Neoplasms, Ovarian Neoplasms, Schistosomiasis, Carcinoma, Leiomyosarcoma, Breast Neoplasms, Mouth Neoplasms, Adenocarcinoma, Mesothelioma, Neoplasms, Laryngeal Neoplasms, Muscular Dystrophy, Duche…	Neoplasms, Endometriosis, Hepatitis C, Leukemia, Neutropenia, Leukemia, Myeloid, Acute, Leukemia, Myeloid, Acute, Leukemia, Lymphocytic, Chronic, B-Cell, Adenoviridae Infections, Prostatic Neoplasms, Crohn Disease, Urinary Bladder Neoplasms, Hepatitis C, Leukemia, Myeloid, Acute, Glioblastoma, Precursor Cell Lymphoblastic Leukemia-Lymphoma, Pancreatic Neoplasms, Stomach Neoplasms, Leukemia, Gliob…	FALSE	FALSE	-1	1
hsa-mir-31	NFAT5	mirna-gene	Experimental	mirtarbase.adstudy	Retinal Neovascularization, Retinal Neovascularization, Colorectal Neoplasms, Colorectal Neoplasms, Stomach Neoplasms, Medulloblastoma, Lung Neoplasms, Mouth Neoplasms, Carcinoma, Myocardial Infarction, Neoplasms, Ovarian Neoplasms, Schistosomiasis, Carcinoma, Leiomyosarcoma, Breast Neoplasms, Mouth Neoplasms, Adenocarcinoma, Mesothelioma, Neoplasms, Laryngeal Neoplasms, Muscular Dystrophy, Duche…		FALSE	FALSE	1	1
hsa-mir-31	hsa-mir-129-5p	mirna-mirna	Predicted	Pmmr	Retinal Neovascularization, Retinal Neovascularization, Colorectal Neoplasms, Colorectal Neoplasms, Stomach Neoplasms, Medulloblastoma, Lung Neoplasms, Mouth Neoplasms, Carcinoma, Myocardial Infarction, Neoplasms, Ovarian Neoplasms, Schistosomiasis, Carcinoma, Leiomyosarcoma, Breast Neoplasms, Mouth Neoplasms, Adenocarcinoma, Mesothelioma, Neoplasms, Laryngeal Neoplasms, Muscular Dystrophy, Duche…		FALSE	FALSE	-1	1
hsa-mir-31	hsa-let-7f	mirna-mirna	Predicted	Pmmr	Retinal Neovascularization, Retinal Neovascularization, Colorectal Neoplasms, Colorectal Neoplasms, Stomach Neoplasms, Medulloblastoma, Lung Neoplasms, Mouth Neoplasms, Carcinoma, Myocardial Infarction, Neoplasms, Ovarian Neoplasms, Schistosomiasis, Carcinoma, Leiomyosarcoma, Breast Neoplasms, Mouth Neoplasms, Adenocarcinoma, Mesothelioma, Neoplasms, Laryngeal Neoplasms, Muscular Dystrophy, Duche…		FALSE	FALSE	-1	1
hsa-mir-34a	hsa-mir-103	mirna-mirna	Predicted	Pmmr	Breast Neoplasms, Colonic Neoplasms, Lung Neoplasms, Muscular Disorders, Atrophic, Neuroblastoma, Lymphoma, B-Cell, Leukemia, Promyelocytic, Acute, Precursor Cell Lymphoblastic Leukemia-Lymphoma, Neoplasms, Neoplasms, Uterine Cervical Neoplasms, Stomach Neoplasms, Carcinoma, Hepatocellular, Carcinoma, Hepatocellular, Carcinoma, Hepatocellular, Melanoma, Lung Neoplasms, Leukemia, Lymphocytic, Chro…		FALSE	FALSE	-1	1
hsa-mir-34a	hsa-mir-29a	mirna-mirna	Predicted	Pmmr	Breast Neoplasms, Colonic Neoplasms, Lung Neoplasms, Muscular Disorders, Atrophic, Neuroblastoma, Lymphoma, B-Cell, Leukemia, Promyelocytic, Acute, Precursor Cell Lymphoblastic Leukemia-Lymphoma, Neoplasms, Neoplasms, Uterine Cervical Neoplasms, Stomach Neoplasms, Carcinoma, Hepatocellular, Carcinoma, Hepatocellular, Carcinoma, Hepatocellular, Melanoma, Lung Neoplasms, Leukemia, Lymphocytic, Chro…	Acquired Immunodeficiency Syndrome, Heart Failure, Leukemia, Lymphocytic, Chronic, B-Cell, Lung Neoplasms, Lung Neoplasms, Neoplasms, Schizophrenia, Lymphoma, B-Cell, Alzheimer Disease, Precursor Cell Lymphoblastic Leukemia-Lymphoma, Acquired Immunodeficiency Syndrome, Breast Neoplasms, Ovarian Neoplasms, Rhabdomyosarcoma, Neoplasms, Alzheimer Disease, Endomyocardial Fibrosis, Breast Neoplasms, M…	FALSE	FALSE	1	1
hsa-mir-34a	hsa-let-7f	mirna-mirna	Predicted	Pmmr	Breast Neoplasms, Colonic Neoplasms, Lung Neoplasms, Muscular Disorders, Atrophic, Neuroblastoma, Lymphoma, B-Cell, Leukemia, Promyelocytic, Acute, Precursor Cell Lymphoblastic Leukemia-Lymphoma, Neoplasms, Neoplasms, Uterine Cervical Neoplasms, Stomach Neoplasms, Carcinoma, Hepatocellular, Carcinoma, Hepatocellular, Carcinoma, Hepatocellular, Melanoma, Lung Neoplasms, Leukemia, Lymphocytic, Chro…		FALSE	FALSE	-1	1
hsa-mir-34a	hsa-mir-135a	mirna-mirna	Predicted	Pmmr	Breast Neoplasms, Colonic Neoplasms, Lung Neoplasms, Muscular Disorders, Atrophic, Neuroblastoma, Lymphoma, B-Cell, Leukemia, Promyelocytic, Acute, Precursor Cell Lymphoblastic Leukemia-Lymphoma, Neoplasms, Neoplasms, Uterine Cervical Neoplasms, Stomach Neoplasms, Carcinoma, Hepatocellular, Carcinoma, Hepatocellular, Carcinoma, Hepatocellular, Melanoma, Lung Neoplasms, Leukemia, Lymphocytic, Chro…		FALSE	FALSE	1	1
hsa-mir-34a	PEA15	mirna-gene	Experimental	mirtarbase.adstudy	Breast Neoplasms, Colonic Neoplasms, Lung Neoplasms, Muscular Disorders, Atrophic, Neuroblastoma, Lymphoma, B-Cell, Leukemia, Promyelocytic, Acute, Precursor Cell Lymphoblastic Leukemia-Lymphoma, Neoplasms, Neoplasms, Uterine Cervical Neoplasms, Stomach Neoplasms, Carcinoma, Hepatocellular, Carcinoma, Hepatocellular, Carcinoma, Hepatocellular, Melanoma, Lung Neoplasms, Leukemia, Lymphocytic, Chro…		FALSE	FALSE	1	1
hsa-mir-34a	hsa-mir-196b	mirna-mirna	Predicted	Pmmr	Breast Neoplasms, Colonic Neoplasms, Lung Neoplasms, Muscular Disorders, Atrophic, Neuroblastoma, Lymphoma, B-Cell, Leukemia, Promyelocytic, Acute, Precursor Cell Lymphoblastic Leukemia-Lymphoma, Neoplasms, Neoplasms, Uterine Cervical Neoplasms, Stomach Neoplasms, Carcinoma, Hepatocellular, Carcinoma, Hepatocellular, Carcinoma, Hepatocellular, Melanoma, Lung Neoplasms, Leukemia, Lymphocytic, Chro…	Neoplasms, Endometriosis, Hepatitis C, Leukemia, Neutropenia, Leukemia, Myeloid, Acute, Leukemia, Myeloid, Acute, Leukemia, Lymphocytic, Chronic, B-Cell, Adenoviridae Infections, Prostatic Neoplasms, Crohn Disease, Urinary Bladder Neoplasms, Hepatitis C, Leukemia, Myeloid, Acute, Glioblastoma, Precursor Cell Lymphoblastic Leukemia-Lymphoma, Pancreatic Neoplasms, Stomach Neoplasms, Leukemia, Gliob…	FALSE	FALSE	-1	1
hsa-mir-34a	CD44	mirna-gene	Experimental	mirtarbase.adstudy	Breast Neoplasms, Colonic Neoplasms, Lung Neoplasms, Muscular Disorders, Atrophic, Neuroblastoma, Lymphoma, B-Cell, Leukemia, Promyelocytic, Acute, Precursor Cell Lymphoblastic Leukemia-Lymphoma, Neoplasms, Neoplasms, Uterine Cervical Neoplasms, Stomach Neoplasms, Carcinoma, Hepatocellular, Carcinoma, Hepatocellular, Carcinoma, Hepatocellular, Melanoma, Lung Neoplasms, Leukemia, Lymphocytic, Chro…	Stomach Neoplasms, Leukemia, Promyelocytic, Acute, Pancreatic Neoplasms, Skin Diseases, Acute Kidney Injury, Arsenic Poisoning, Mammary Neoplasms, Experimental, Nerve Degeneration, Peripheral Nervous System Diseases, Vitiligo	FALSE	FALSE	1	1
hsa-mir-375	KCNQ2	mirna-gene	Experimental	mirtarbase	Diabetes Mellitus, Diabetes Mellitus, Salivary Gland Neoplasms, Adrenocortical Carcinoma, Liver Neoplasms, Carcinoma, Carcinoma, Carcinoma, Squamous Cell, Stomach Neoplasms, Laryngeal Neoplasms, Gastrointestinal Neoplasms, Stomach Neoplasms, Endometriosis, Adrenocortical Carcinoma, Esophageal Neoplasms, Esophageal Neoplasms, Prostatic Neoplasms, Carcinoma, Squamous Cell, Melanoma, Carcinoma, Squa…	SEIZURES, BENIGN FAMILIAL NEONATAL, 1, EPILEPTIC ENCEPHALOPATHY, EARLY INFANTILE, 7, Epilepsy, Epilepsy, Benign Neonatal, Developmental Disabilities, Nervous System Diseases	FALSE	FALSE	1	-1
hsa-mir-9-5p	MMP13	mirna-gene	Experimental	mirtarbase		Spondyloepimetaphyseal Dysplasia, Missouri Type, Liver Cirrhosis, Experimental, Craniofacial Abnormalities, Prostatic Neoplasms	FALSE	FALSE	1	-1
hsa-mir-9-5p	OTUD7B	mirna-gene	Predicted	Starbase			FALSE	FALSE	1	-1
hsa-mir-9-5p	ONECUT2	mirna-gene	Experimental	mirtarbase			FALSE	FALSE	1	-1
hsa-mir-9-5p	TINAGL1	mirna-gene	Predicted	Starbase			FALSE	FALSE	1	-1
hsa-mir-9-5p	ZBTB38	mirna-gene	Predicted	Starbase			FALSE	FALSE	1	-1
hsa-mir-9-5p	SH2B3	mirna-gene	Predicted	Starbase		Celiac Disease, Diabetes Mellitus, Type 1, Lupus Erythematosus, Systemic, Coronary Artery Disease, Myocardial Infarction, Inflammation, Vitiligo	FALSE	FALSE	1	-1
hsa-mir-9-5p	ANKRD52	mirna-gene	Predicted	Starbase			FALSE	FALSE	1	-1
hsa-mir-9-5p	ANXA2	mirna-gene	Predicted	Starbase		Leukemia, Myeloid, Acute, Carcinoma, Squamous Cell, Osteoporosis, Liver Neoplasms, Mammary Neoplasms, Animal, Mouth Neoplasms, Neoplasm Invasiveness, Weight Gain	FALSE	FALSE	1	-1
hsa-mir-9-5p	KCNH5	mirna-gene	Predicted	Starbase			FALSE	FALSE	1	-1
hsa-mir-9-5p	CCNG1	mirna-gene	Predicted	Starbase		Lung Neoplasms	FALSE	FALSE	1	-1
hsa-mir-9-5p	PRTG	mirna-gene	Predicted	Starbase			FALSE	FALSE	1	-1
hsa-mir-9-5p	CRIM1	mirna-gene	Predicted	Starbase			FALSE	FALSE	1	-1
hsa-mir-9-5p	FREM2	mirna-gene	Predicted	Starbase		Fraser Syndrome	FALSE	FALSE	1	-1
hsa-mir-92a-3p	OSBPL2	mirna-gene	Experimental	mirtarbase			FALSE	FALSE	1	-1
hsa-mir-92a-3p	MYO5A	mirna-gene	Predicted	Starbase		Griscelli syndrome type 1, Peripheral Nervous System Diseases	FALSE	FALSE	1	-1
hsa-mir-92a-3p	LCOR	mirna-gene	Predicted	Starbase			FALSE	FALSE	1	-1
hsa-mir-92a-3p	GRAMD1B	mirna-gene	Predicted	Starbase			FALSE	FALSE	1	-1
hsa-mir-92a-3p	MAN2A1	mirna-gene	Predicted	Starbase			FALSE	FALSE	1	-1
hsa-mir-92a-3p	SLC12A5	mirna-gene	Predicted	Starbase		Epilepsy, Seizures, Epilepsy, Temporal Lobe, Status Epilepticus, Hyperalgesia	FALSE	FALSE	1	-1
hsa-mir-92a-3p	SH3PXD2A	mirna-gene	Predicted	Starbase			FALSE	FALSE	1	-1
hsa-mir-92a-3p	GLCE	mirna-gene	Predicted	Starbase			FALSE	FALSE	-1	-1
hsa-mir-92a-3p	NFAT5	mirna-gene	Predicted	Starbase			FALSE	FALSE	1	-1
hsa-mir-92a-3p	BMPR2	mirna-gene	Experimental	mirtarbase		Pulmonary arterial hypertension, Hypertension, Pulmonary, Pulmonary Veno-Occlusive Disease, Hyperandrogenism	FALSE	FALSE	1	-1
hsa-mir-92a-3p	SLC9A1	mirna-gene	Predicted	Starbase		Reperfusion Injury, Shock, Hemorrhagic, Heart Failure, Barrett Esophagus, Cardiomyopathy, Hypertrophic, Diabetes Mellitus, Experimental, Edema, Pain	FALSE	FALSE	1	-1
hsa-mir-92a-3p	FAM20C	mirna-gene	Predicted	Starbase		Raine syndrome	FALSE	FALSE	1	-1
hsa-mir-92a-3p	ELOVL4	mirna-gene	Predicted	Starbase		Stargardt disease 3	FALSE	FALSE	-1	-1
hsa-mir-92a-3p	SOX4	mirna-gene	Predicted	Starbase		Carcinoma, Adenoid Cystic, Liver Neoplasms, Experimental, Salivary Gland Neoplasms	FALSE	FALSE	-1	-1
hsa-mir-92a-3p	RBL2	mirna-gene	Predicted	Starbase		Leukemia, Lymphocytic, Chronic, B-Cell, Ovarian Neoplasms	FALSE	FALSE	1	-1
hsa-mir-92a-3p	DUSP10	mirna-gene	Predicted	Starbase		Inflammation	FALSE	FALSE	1	-1
hsa-mir-92a-3p	ARID4B	mirna-gene	Experimental	mirtarbase		Carcinoma, Adenoid Cystic	FALSE	FALSE	1	-1
hsa-mir-92a-3p	SNX13	mirna-gene	Predicted	Starbase			FALSE	FALSE	1	-1
hsa-mir-92a-3p	PDE10A	mirna-gene	Predicted	Starbase			FALSE	FALSE	1	-1
hsa-mir-92a-3p	ANO8	mirna-gene	Predicted	Starbase			FALSE	FALSE	1	-1
hsa-mir-92a-3p	DOCK5	mirna-gene	Predicted	Starbase			FALSE	FALSE	1	-1
hsa-mir-92a-3p	ADAMTSL3	mirna-gene	Predicted	Starbase			FALSE	FALSE	1	-1
hsa-mir-92a-3p	ATXN1	mirna-gene	Predicted	Starbase		Spinocerebellar Ataxias	FALSE	FALSE	1	-1
hsa-mir-92a-3p	HIPK3	mirna-gene	Experimental	mirtarbase			FALSE	FALSE	1	-1
hsa-mir-92a-3p	FOSL2	mirna-gene	Predicted	Starbase			FALSE	FALSE	1	-1
hsa-mir-92a-3p	TOP1	mirna-gene	Predicted	Starbase		Neoplasms, Drug Toxicity	FALSE	FALSE	-1	-1
hsa-mir-92b-3p	BMPR2	mirna-gene	Predicted	Starbase		Pulmonary arterial hypertension, Hypertension, Pulmonary, Pulmonary Veno-Occlusive Disease, Hyperandrogenism	FALSE	FALSE	1	-1
hsa-mir-92b-3p	FAM20C	mirna-gene	Predicted	Starbase		Raine syndrome	FALSE	FALSE	1	-1
hsa-mir-92b-3p	ELOVL4	mirna-gene	Predicted	Starbase		Stargardt disease 3	FALSE	FALSE	-1	-1
hsa-mir-92b-3p	ANO8	mirna-gene	Predicted	Starbase			FALSE	FALSE	1	-1
hsa-mir-92b-3p	PDE10A	mirna-gene	Predicted	Starbase			FALSE	FALSE	1	-1
hsa-mir-92b-3p	SNX13	mirna-gene	Predicted	Starbase			FALSE	FALSE	1	-1
hsa-mir-92b-3p	TOP1	mirna-gene	Predicted	Starbase		Neoplasms, Drug Toxicity	FALSE	FALSE	-1	-1
hsa-mir-92b-3p	SOX4	mirna-gene	Predicted	Starbase		Carcinoma, Adenoid Cystic, Liver Neoplasms, Experimental, Salivary Gland Neoplasms	FALSE	FALSE	-1	-1
hsa-mir-92b-3p	FOSL2	mirna-gene	Predicted	Starbase			FALSE	FALSE	1	-1
hsa-mir-92b-3p	GRAMD1B	mirna-gene	Predicted	Starbase			FALSE	FALSE	1	-1
hsa-mir-92b-3p	SLC9A1	mirna-gene	Predicted	Starbase		Reperfusion Injury, Shock, Hemorrhagic, Heart Failure, Barrett Esophagus, Cardiomyopathy, Hypertrophic, Diabetes Mellitus, Experimental, Edema, Pain	FALSE	FALSE	1	-1
hsa-mir-92b-3p	DOCK5	mirna-gene	Predicted	Starbase			FALSE	FALSE	1	-1
hsa-mir-92b-3p	HIPK3	mirna-gene	Predicted	Starbase			FALSE	FALSE	1	-1
hsa-mir-92b-3p	SH3PXD2A	mirna-gene	Predicted	Starbase			FALSE	FALSE	1	-1
hsa-mir-92b-3p	ADAMTSL3	mirna-gene	Predicted	Starbase			FALSE	FALSE	1	-1
hsa-mir-92b-3p	GLCE	mirna-gene	Predicted	Starbase			FALSE	FALSE	-1	-1
hsa-mir-92b-3p	ATXN1	mirna-gene	Predicted	Starbase		Spinocerebellar Ataxias	FALSE	FALSE	1	-1
hsa-mir-92b-3p	SLC12A5	mirna-gene	Predicted	Starbase		Epilepsy, Seizures, Epilepsy, Temporal Lobe, Status Epilepticus, Hyperalgesia	FALSE	FALSE	1	-1
hsa-mir-92b-3p	RBL2	mirna-gene	Predicted	Starbase		Leukemia, Lymphocytic, Chronic, B-Cell, Ovarian Neoplasms	FALSE	FALSE	1	-1
hsa-mir-92b-3p	NFAT5	mirna-gene	Predicted	Starbase			FALSE	FALSE	1	-1
hsa-mir-92b-3p	MAN2A1	mirna-gene	Predicted	Starbase			FALSE	FALSE	1	-1
hsa-mir-92b-3p	MYO5A	mirna-gene	Predicted	Starbase		Griscelli syndrome type 1, Peripheral Nervous System Diseases	FALSE	FALSE	1	-1
hsa-mir-92b-3p	LCOR	mirna-gene	Predicted	Starbase			FALSE	FALSE	1	-1
hsa-mir-92b-3p	DUSP10	mirna-gene	Predicted	Starbase		Inflammation	FALSE	FALSE	1	-1
hsa-mir-93	hsa-let-7f	mirna-mirna	Predicted	Pmmr	Ovarian Neoplasms, Ovarian Neoplasms, Breast Neoplasms, Melanoma, Autistic Disorder, Stomach Neoplasms, Ovarian Neoplasms, Prostatic Neoplasms, Neoplasms, Glioma, Prostatic Neoplasms, Carcinoma, Hepatocellular, Urinary Bladder Neoplasms, Lung Neoplasms, Trophoblasts, Neoplasms, Adenocarcinoma, Toxoplasmosis, Laryngeal Neoplasms, Mycosis Fungoides, Colorectal Neoplasms, Colorectal Neoplasms, Burki…		FALSE	FALSE	-1	-1
hsa-mir-93	CDKN1A	mirna-gene	Experimental	mirtarbase.adstudy	Ovarian Neoplasms, Ovarian Neoplasms, Breast Neoplasms, Melanoma, Autistic Disorder, Stomach Neoplasms, Ovarian Neoplasms, Prostatic Neoplasms, Neoplasms, Glioma, Prostatic Neoplasms, Carcinoma, Hepatocellular, Urinary Bladder Neoplasms, Lung Neoplasms, Trophoblasts, Neoplasms, Adenocarcinoma, Toxoplasmosis, Laryngeal Neoplasms, Mycosis Fungoides, Colorectal Neoplasms, Colorectal Neoplasms, Burki…	Colonic Neoplasms, Prostatic Neoplasms, Urinary Bladder Neoplasms, Lung Neoplasms, Papilloma, Stomach Neoplasms, Esophageal Squamous Cell Carcinoma, Carcinoma, Transitional Cell, Intestinal Neoplasms, HIV Infections, Kidney Diseases, Muscular Dystrophy, Facioscapulohumeral, Reperfusion Injury	FALSE	FALSE	1	-1
hsa-mir-93	hsa-mir-196b	mirna-mirna	Predicted	Pmmr	Ovarian Neoplasms, Ovarian Neoplasms, Breast Neoplasms, Melanoma, Autistic Disorder, Stomach Neoplasms, Ovarian Neoplasms, Prostatic Neoplasms, Neoplasms, Glioma, Prostatic Neoplasms, Carcinoma, Hepatocellular, Urinary Bladder Neoplasms, Lung Neoplasms, Trophoblasts, Neoplasms, Adenocarcinoma, Toxoplasmosis, Laryngeal Neoplasms, Mycosis Fungoides, Colorectal Neoplasms, Colorectal Neoplasms, Burki…	Neoplasms, Endometriosis, Hepatitis C, Leukemia, Neutropenia, Leukemia, Myeloid, Acute, Leukemia, Myeloid, Acute, Leukemia, Lymphocytic, Chronic, B-Cell, Adenoviridae Infections, Prostatic Neoplasms, Crohn Disease, Urinary Bladder Neoplasms, Hepatitis C, Leukemia, Myeloid, Acute, Glioblastoma, Precursor Cell Lymphoblastic Leukemia-Lymphoma, Pancreatic Neoplasms, Stomach Neoplasms, Leukemia, Gliob…	FALSE	FALSE	-1	-1
hsa-mir-93	hsa-mir-21	mirna-mirna	Predicted	Pmmr	Ovarian Neoplasms, Ovarian Neoplasms, Breast Neoplasms, Melanoma, Autistic Disorder, Stomach Neoplasms, Ovarian Neoplasms, Prostatic Neoplasms, Neoplasms, Glioma, Prostatic Neoplasms, Carcinoma, Hepatocellular, Urinary Bladder Neoplasms, Lung Neoplasms, Trophoblasts, Neoplasms, Adenocarcinoma, Toxoplasmosis, Laryngeal Neoplasms, Mycosis Fungoides, Colorectal Neoplasms, Colorectal Neoplasms, Burki…	Brain Neoplasms, Brain Neoplasms, Breast Neoplasms, Breast Neoplasms, Breast Neoplasms, Breast Neoplasms, Breast Neoplasms, Cholangiocarcinoma, Colonic Neoplasms, Dermatitis, Atopic, Focal Epithelial Hyperplasia, Glioblastoma, Glioblastoma, Glioblastoma, Glioblastoma, Glioblastoma, Glioblastoma, Heart Diseases, Heart Failure, Lung Neoplasms, Lung Neoplasms, Lymphoma, Large B-Cell, Diffuse, Muscul…	FALSE	FALSE	1	-1

## Sheet: Table S2.4-TPP-exp+predic
regulator	target	category	evidence	source	regulator.association.disease	target.association.disease	is_regulator_in_disease	is_target_in_disease	target.reg	regulator.reg
RARG	RARG	tf-gene	Experimental	Transfac	Cleft Palate, Musculoskeletal Abnormalities	Cleft Palate, Musculoskeletal Abnormalities	FALSE	FALSE	1	1
RXRA	RARG	tf-gene	Experimental	Transfac	Prostatic Neoplasms, Amyotrophic lateral sclerosis 1, Sciatic Neuropathy	Cleft Palate, Musculoskeletal Abnormalities	FALSE	FALSE	1	1
RXRA	SEMA6B	tf-gene	Experimental	PMID20584335	Prostatic Neoplasms, Amyotrophic lateral sclerosis 1, Sciatic Neuropathy		FALSE	FALSE	1	1
RXRA	CYP3A4	tf-gene	Experimental	PMID20584335	Prostatic Neoplasms, Amyotrophic lateral sclerosis 1, Sciatic Neuropathy	Breast Neoplasms, Prostatic Neoplasms, Osteosarcoma, Hepatitis C, Torsades de Pointes	FALSE	FALSE	1	1
RXRA	hsa-mir-146b	tf-mirna	Predicted	Chipbase	Prostatic Neoplasms, Amyotrophic lateral sclerosis 1, Sciatic Neuropathy	Breast Neoplasms, Leukemia, Lymphocytic, Chronic, B-Cell, Lung Neoplasms, Muscular Disorders, Atrophic, Muscular Disorders, Atrophic, Pancreatic Neoplasms, Prostatic Neoplasms, Psoriasis, Thyroid Neoplasms, Thyroid Neoplasms, Thyroid Neoplasms, Thyroid Neoplasms, Thyroid Neoplasms, Autistic Disorder, Autistic Disorder, Breast Neoplasms, Breast Neoplasms, Glioma, Head and Neck Neoplasms, Thyroid N…	FALSE	FALSE	1	1
RXRA	hsa-mir-21	tf-mirna	Predicted	Chipbase	Prostatic Neoplasms, Amyotrophic lateral sclerosis 1, Sciatic Neuropathy	Brain Neoplasms, Brain Neoplasms, Breast Neoplasms, Breast Neoplasms, Breast Neoplasms, Breast Neoplasms, Breast Neoplasms, Cholangiocarcinoma, Colonic Neoplasms, Dermatitis, Atopic, Focal Epithelial Hyperplasia, Glioblastoma, Glioblastoma, Glioblastoma, Glioblastoma, Glioblastoma, Glioblastoma, Heart Diseases, Heart Failure, Lung Neoplasms, Lung Neoplasms, Lymphoma, Large B-Cell, Diffuse, Muscul…	FALSE	FALSE	1	1
RXRA	hsa-mir-196b	tf-mirna	Predicted	Chipbase	Prostatic Neoplasms, Amyotrophic lateral sclerosis 1, Sciatic Neuropathy	Neoplasms, Endometriosis, Hepatitis C, Leukemia, Neutropenia, Leukemia, Myeloid, Acute, Leukemia, Myeloid, Acute, Leukemia, Lymphocytic, Chronic, B-Cell, Adenoviridae Infections, Prostatic Neoplasms, Crohn Disease, Urinary Bladder Neoplasms, Hepatitis C, Leukemia, Myeloid, Acute, Glioblastoma, Precursor Cell Lymphoblastic Leukemia-Lymphoma, Pancreatic Neoplasms, Stomach Neoplasms, Leukemia, Gliob…	FALSE	FALSE	-1	1
RXRA	hsa-mir-146a	tf-mirna	Predicted	Chipbase	Prostatic Neoplasms, Amyotrophic lateral sclerosis 1, Sciatic Neuropathy	Breast Neoplasms, Leukemia, Lymphocytic, Chronic, B-Cell, Lung Neoplasms, Muscular Disorders, Atrophic, Pancreatic Neoplasms, Prostatic Neoplasms, Psoriasis, Psoriasis, Thyroid Neoplasms, Thyroid Neoplasms, Thyroid Neoplasms, Thyroid Neoplasms, Thyroid Neoplasms, Lymphoma, B-Cell, Burkitt Lymphoma, Eczema, Alzheimer Disease, Autistic Disorder, Breast Neoplasms, Breast Neoplasms, Breast Neoplasms,…	FALSE	FALSE	1	1
RXRA	hsa-mir-192	tf-mirna	Predicted	Chipbase	Prostatic Neoplasms, Amyotrophic lateral sclerosis 1, Sciatic Neuropathy	Heart Failure, Lung Neoplasms, Lung Neoplasms, Colonic Neoplasms, Adrenocortical Carcinoma, Nephrosclerosis, Adenocarcinoma, Fibrosis, Reperfusion Injury, Carcinoma, Multiple Myeloma, Lupus Erythematosus, Systemic, Retinoblastoma, Carcinoma, Hepatocellular, Pancreatic Neoplasms, Muscular Dystrophies, Drug-Induced Liver Injury, Barrett Esophagus, Carcinoma, Hepatocellular, Stomach Neoplasms, Diabe…	FALSE	FALSE	1	1
VDR	CYP3A4	tf-gene	Experimental	Transfac	Vitamin D-Dependent Rickets, Type 2A, Osteoporosis, Rickets, Prostatic Neoplasms, Hypertension, Vitamin D Deficiency, Neoplasms, Alopecia, Uremia, Carcinoma, Transitional Cell, Epilepsy, Temporal Lobe, Genetic Diseases, Inborn, Leukemia, Lymphocytic, Chronic, B-Cell	Breast Neoplasms, Prostatic Neoplasms, Osteosarcoma, Hepatitis C, Torsades de Pointes	FALSE	FALSE	1	1
hsa-let-7d-5p	MXD1	mirna-gene	Predicted	Starbase		Dermatitis, Allergic Contact	FALSE	FALSE	1	-1
hsa-let-7d-5p	KREMEN1	mirna-gene	Predicted	Starbase			FALSE	FALSE	1	-1
hsa-let-7d-5p	APBB3	mirna-gene	Predicted	Starbase			FALSE	FALSE	1	-1
hsa-let-7d-5p	TNFAIP3	mirna-gene	Predicted	Starbase		Lupus Erythematosus, Systemic, Arthritis, Rheumatoid, Psoriasis	FALSE	FALSE	1	-1
hsa-let-7d-5p	SLC5A6	mirna-gene	Predicted	Starbase			FALSE	FALSE	1	-1
hsa-let-7d-5p	XYLT1	mirna-gene	Predicted	Starbase		Pseudoxanthoma Elasticum, Substance-Related Disorders	FALSE	FALSE	1	-1
hsa-let-7d-5p	PBX1	mirna-gene	Predicted	Starbase		Burkitt Lymphoma, Substance-Related Disorders	FALSE	FALSE	1	-1
hsa-let-7d-5p	RBMS1	mirna-gene	Predicted	Starbase			FALSE	FALSE	1	-1
hsa-mir-1	NFAT5	mirna-gene	Predicted	Starbase			FALSE	FALSE	1	1
hsa-mir-1	PUM2	mirna-gene	Predicted	Starbase			FALSE	FALSE	1	1
hsa-mir-1	HIVEP2	mirna-gene	Predicted	Starbase		Myocardial Ischemia	FALSE	FALSE	1	1
hsa-mir-125b-5p	VDR	mirna-gene	Experimental	mirtarbase		Vitamin D-Dependent Rickets, Type 2A, Osteoporosis, Rickets, Prostatic Neoplasms, Hypertension, Vitamin D Deficiency, Neoplasms, Alopecia, Uremia, Carcinoma, Transitional Cell, Epilepsy, Temporal Lobe, Genetic Diseases, Inborn, Leukemia, Lymphocytic, Chronic, B-Cell	FALSE	FALSE	1	-1
hsa-mir-125b-5p	ATP13A3	mirna-gene	Predicted	Starbase			FALSE	FALSE	1	-1
hsa-mir-125b-5p	LIFR	mirna-gene	Predicted	Starbase		Stuve-Wiedemann syndrome, Polycystic Ovary Syndrome, Prostatic Neoplasms	FALSE	FALSE	1	-1
hsa-mir-125b-5p	TNFAIP3	mirna-gene	Experimental	mirtarbase		Lupus Erythematosus, Systemic, Arthritis, Rheumatoid, Psoriasis	FALSE	FALSE	1	-1
hsa-mir-125b-5p	SLC7A1	mirna-gene	Predicted	Starbase		Prostatic Neoplasms	FALSE	FALSE	1	-1
hsa-mir-125b-5p	GRB10	mirna-gene	Predicted	Starbase			FALSE	FALSE	1	-1
hsa-mir-125b-5p	MAP3K10	mirna-gene	Predicted	Starbase			FALSE	FALSE	1	-1
hsa-mir-125b-5p	ATXN1	mirna-gene	Predicted	Starbase		Spinocerebellar Ataxias	FALSE	FALSE	1	-1
hsa-mir-128-3p	RPS6KA5	mirna-gene	Predicted	Starbase		Cocaine-Related Disorders	FALSE	FALSE	1	-1
hsa-mir-128-3p	TBC1D9B	mirna-gene	Predicted	Starbase			FALSE	FALSE	1	-1
hsa-mir-128-3p	ARID4B	mirna-gene	Predicted	Starbase		Carcinoma, Adenoid Cystic	FALSE	FALSE	1	-1
hsa-mir-143	DNMT3A	mirna-gene	Experimental	mirtarbase.adstudy	Breast Neoplasms, Colonic Neoplasms, Colonic Neoplasms, Colonic Neoplasms, Colonic Neoplasms, Colonic Neoplasms, Colorectal Neoplasms, Hepatitis, Chronic, Hepatitis, Chronic, Lung Neoplasms, Muscular Disorders, Atrophic, Obesity, ACTH-Secreting Pituitary Adenoma, Barrett Esophagus, Urinary Bladder Neoplasms, Uterine Cervical Neoplasms, Colorectal Neoplasms, Colorectal Neoplasms, Endometriosis, Ob…	Crohn Disease, Lung Neoplasms, Leukemia, Monocytic, Acute	FALSE	FALSE	1	1
hsa-mir-145-5p	MYO5A	mirna-gene	Experimental	mirtarbase		Griscelli syndrome type 1, Peripheral Nervous System Diseases	FALSE	FALSE	1	-1
hsa-mir-145-5p	FMNL2	mirna-gene	Predicted	Starbase			FALSE	FALSE	1	-1
hsa-mir-145-5p	KREMEN1	mirna-gene	Experimental	mirtarbase			FALSE	FALSE	1	-1
hsa-mir-145-5p	ANKRD52	mirna-gene	Predicted	Starbase			FALSE	FALSE	1	-1
hsa-mir-145-5p	GRB10	mirna-gene	Predicted	Starbase			FALSE	FALSE	1	-1
hsa-mir-152	hsa-mir-143	mirna-mirna	Predicted	Pmmr	Asthma, Pre-Eclampsia, Adenocarcinoma, Carcinoma, Hepatocellular, Colonic Neoplasms, Gastrointestinal Neoplasms, Colorectal Neoplasms, Gastrointestinal Neoplasms, Endometrial Neoplasms, Endometrial Neoplasms, Ovarian Neoplasms, Pre-Eclampsia, Neuroblastoma, Atherosclerosis, Atherosclerosis, Breast Neoplasms, Glioma, Ovarian Neoplasms, Prostatic Neoplasms, Anxiety Disorders	Breast Neoplasms, Colonic Neoplasms, Colonic Neoplasms, Colonic Neoplasms, Colonic Neoplasms, Colonic Neoplasms, Colorectal Neoplasms, Hepatitis, Chronic, Hepatitis, Chronic, Lung Neoplasms, Muscular Disorders, Atrophic, Obesity, ACTH-Secreting Pituitary Adenoma, Barrett Esophagus, Urinary Bladder Neoplasms, Uterine Cervical Neoplasms, Colorectal Neoplasms, Colorectal Neoplasms, Endometriosis, Ob…	FALSE	FALSE	1	1
hsa-mir-152	hsa-mir-196b	mirna-mirna	Predicted	Pmmr	Asthma, Pre-Eclampsia, Adenocarcinoma, Carcinoma, Hepatocellular, Colonic Neoplasms, Gastrointestinal Neoplasms, Colorectal Neoplasms, Gastrointestinal Neoplasms, Endometrial Neoplasms, Endometrial Neoplasms, Ovarian Neoplasms, Pre-Eclampsia, Neuroblastoma, Atherosclerosis, Atherosclerosis, Breast Neoplasms, Glioma, Ovarian Neoplasms, Prostatic Neoplasms, Anxiety Disorders	Neoplasms, Endometriosis, Hepatitis C, Leukemia, Neutropenia, Leukemia, Myeloid, Acute, Leukemia, Myeloid, Acute, Leukemia, Lymphocytic, Chronic, B-Cell, Adenoviridae Infections, Prostatic Neoplasms, Crohn Disease, Urinary Bladder Neoplasms, Hepatitis C, Leukemia, Myeloid, Acute, Glioblastoma, Precursor Cell Lymphoblastic Leukemia-Lymphoma, Pancreatic Neoplasms, Stomach Neoplasms, Leukemia, Gliob…	FALSE	FALSE	-1	1
hsa-mir-152	hsa-mir-21	mirna-mirna	Predicted	Pmmr	Asthma, Pre-Eclampsia, Adenocarcinoma, Carcinoma, Hepatocellular, Colonic Neoplasms, Gastrointestinal Neoplasms, Colorectal Neoplasms, Gastrointestinal Neoplasms, Endometrial Neoplasms, Endometrial Neoplasms, Ovarian Neoplasms, Pre-Eclampsia, Neuroblastoma, Atherosclerosis, Atherosclerosis, Breast Neoplasms, Glioma, Ovarian Neoplasms, Prostatic Neoplasms, Anxiety Disorders	Brain Neoplasms, Brain Neoplasms, Breast Neoplasms, Breast Neoplasms, Breast Neoplasms, Breast Neoplasms, Breast Neoplasms, Cholangiocarcinoma, Colonic Neoplasms, Dermatitis, Atopic, Focal Epithelial Hyperplasia, Glioblastoma, Glioblastoma, Glioblastoma, Glioblastoma, Glioblastoma, Glioblastoma, Heart Diseases, Heart Failure, Lung Neoplasms, Lung Neoplasms, Lymphoma, Large B-Cell, Diffuse, Muscul…	FALSE	FALSE	1	1
hsa-mir-15a-5p	AGAP3	mirna-gene	Predicted	Starbase			FALSE	FALSE	1	1
hsa-mir-15a-5p	RBMS1	mirna-gene	Predicted	Starbase			FALSE	FALSE	1	1
hsa-mir-15a-5p	WWC1	mirna-gene	Predicted	Starbase			FALSE	FALSE	1	1
hsa-mir-15a-5p	NAV1	mirna-gene	Predicted	Starbase			FALSE	FALSE	1	1
hsa-mir-15a-5p	PLXNA2	mirna-gene	Predicted	Starbase		Schizophrenia	FALSE	FALSE	1	1
hsa-mir-15a-5p	MYO5A	mirna-gene	Predicted	Starbase		Griscelli syndrome type 1, Peripheral Nervous System Diseases	FALSE	FALSE	1	1
hsa-mir-15a-5p	ATP13A3	mirna-gene	Predicted	Starbase			FALSE	FALSE	1	1
hsa-mir-15b-5p	MYO5A	mirna-gene	Predicted	Starbase		Griscelli syndrome type 1, Peripheral Nervous System Diseases	FALSE	FALSE	1	1
hsa-mir-15b-5p	AGAP3	mirna-gene	Predicted	Starbase			FALSE	FALSE	1	1
hsa-mir-15b-5p	DOCK4	mirna-gene	Predicted	Starbase		Autistic Disorder	FALSE	FALSE	1	1
hsa-mir-15b-5p	PLXNA2	mirna-gene	Predicted	Starbase		Schizophrenia	FALSE	FALSE	1	1
hsa-mir-15b-5p	ATP13A3	mirna-gene	Predicted	Starbase			FALSE	FALSE	1	1
hsa-mir-15b-5p	NAV1	mirna-gene	Predicted	Starbase			FALSE	FALSE	1	1
hsa-mir-15b-5p	RBMS1	mirna-gene	Predicted	Starbase			FALSE	FALSE	1	1
hsa-mir-15b-5p	WWC1	mirna-gene	Predicted	Starbase			FALSE	FALSE	1	1
hsa-mir-192	PDE2A	mirna-gene	Experimental	mirtarbase.adstudy	Heart Failure, Lung Neoplasms, Lung Neoplasms, Colonic Neoplasms, Adrenocortical Carcinoma, Nephrosclerosis, Adenocarcinoma, Fibrosis, Reperfusion Injury, Carcinoma, Multiple Myeloma, Lupus Erythematosus, Systemic, Retinoblastoma, Carcinoma, Hepatocellular, Pancreatic Neoplasms, Muscular Dystrophies, Drug-Induced Liver Injury, Barrett Esophagus, Carcinoma, Hepatocellular, Stomach Neoplasms, Diabe…	Breast Neoplasms	FALSE	FALSE	1	1
hsa-mir-196a-5p	ANXA1	mirna-gene	Experimental	mirtarbase		Neoplasm Metastasis, Mammary Neoplasms, Experimental, Carcinoma, Squamous Cell, Prostatic Neoplasms, Carcinoma, Adenocarcinoma of lung, Esophageal Squamous Cell Carcinoma, Lymphatic Metastasis, Craniofacial Abnormalities, Kidney Diseases, Mammary Neoplasms, Animal, Mouth Neoplasms, Neoplasm Invasiveness, Stomach Diseases	FALSE	FALSE	-1	-1
hsa-mir-196a-5p	PBX1	mirna-gene	Predicted	Starbase		Burkitt Lymphoma, Substance-Related Disorders	FALSE	FALSE	1	-1
hsa-mir-196a-5p	PUM2	mirna-gene	Predicted	Starbase			FALSE	FALSE	1	-1
hsa-mir-21	HIPK3	mirna-gene	Experimental	mirrecords.adstudy	Brain Neoplasms, Brain Neoplasms, Breast Neoplasms, Breast Neoplasms, Breast Neoplasms, Breast Neoplasms, Breast Neoplasms, Cholangiocarcinoma, Colonic Neoplasms, Dermatitis, Atopic, Focal Epithelial Hyperplasia, Glioblastoma, Glioblastoma, Glioblastoma, Glioblastoma, Glioblastoma, Glioblastoma, Heart Diseases, Heart Failure, Lung Neoplasms, Lung Neoplasms, Lymphoma, Large B-Cell, Diffuse, Muscul…		FALSE	FALSE	1	1
hsa-mir-21	BMPR2	mirna-gene	Experimental	mirtarbase.adstudy	Brain Neoplasms, Brain Neoplasms, Breast Neoplasms, Breast Neoplasms, Breast Neoplasms, Breast Neoplasms, Breast Neoplasms, Cholangiocarcinoma, Colonic Neoplasms, Dermatitis, Atopic, Focal Epithelial Hyperplasia, Glioblastoma, Glioblastoma, Glioblastoma, Glioblastoma, Glioblastoma, Glioblastoma, Heart Diseases, Heart Failure, Lung Neoplasms, Lung Neoplasms, Lymphoma, Large B-Cell, Diffuse, Muscul…	Pulmonary arterial hypertension, Hypertension, Pulmonary, Pulmonary Veno-Occlusive Disease, Hyperandrogenism	FALSE	FALSE	1	1
hsa-mir-21	TNFAIP3	mirna-gene	Experimental	mirtarbase.adstudy	Brain Neoplasms, Brain Neoplasms, Breast Neoplasms, Breast Neoplasms, Breast Neoplasms, Breast Neoplasms, Breast Neoplasms, Cholangiocarcinoma, Colonic Neoplasms, Dermatitis, Atopic, Focal Epithelial Hyperplasia, Glioblastoma, Glioblastoma, Glioblastoma, Glioblastoma, Glioblastoma, Glioblastoma, Heart Diseases, Heart Failure, Lung Neoplasms, Lung Neoplasms, Lymphoma, Large B-Cell, Diffuse, Muscul…	Lupus Erythematosus, Systemic, Arthritis, Rheumatoid, Psoriasis	FALSE	FALSE	1	1
hsa-mir-301a	hsa-mir-196b	mirna-mirna	Predicted	Pmmr	Salivary Gland Neoplasms, Adrenocortical Carcinoma, Lung Neoplasms, Lung Neoplasms, Breast Neoplasms, Parkinson Disease, Periodontitis, Carcinoma, Hepatocellular, Demyelinating Diseases, Prostatic Neoplasms, Stomach Neoplasms, Colorectal Neoplasms, Diabetes Mellitus	Neoplasms, Endometriosis, Hepatitis C, Leukemia, Neutropenia, Leukemia, Myeloid, Acute, Leukemia, Myeloid, Acute, Leukemia, Lymphocytic, Chronic, B-Cell, Adenoviridae Infections, Prostatic Neoplasms, Crohn Disease, Urinary Bladder Neoplasms, Hepatitis C, Leukemia, Myeloid, Acute, Glioblastoma, Precursor Cell Lymphoblastic Leukemia-Lymphoma, Pancreatic Neoplasms, Stomach Neoplasms, Leukemia, Gliob…	FALSE	FALSE	-1	1
hsa-mir-301a	hsa-mir-143	mirna-mirna	Predicted	Pmmr	Salivary Gland Neoplasms, Adrenocortical Carcinoma, Lung Neoplasms, Lung Neoplasms, Breast Neoplasms, Parkinson Disease, Periodontitis, Carcinoma, Hepatocellular, Demyelinating Diseases, Prostatic Neoplasms, Stomach Neoplasms, Colorectal Neoplasms, Diabetes Mellitus	Breast Neoplasms, Colonic Neoplasms, Colonic Neoplasms, Colonic Neoplasms, Colonic Neoplasms, Colonic Neoplasms, Colorectal Neoplasms, Hepatitis, Chronic, Hepatitis, Chronic, Lung Neoplasms, Muscular Disorders, Atrophic, Obesity, ACTH-Secreting Pituitary Adenoma, Barrett Esophagus, Urinary Bladder Neoplasms, Uterine Cervical Neoplasms, Colorectal Neoplasms, Colorectal Neoplasms, Endometriosis, Ob…	FALSE	FALSE	1	1
hsa-mir-30a-5p	PDE4D	mirna-gene	Predicted	Starbase		Stroke, Asthma, Amphetamine-Related Disorders, Prostatic Neoplasms	FALSE	FALSE	1	1
hsa-mir-30a-5p	ARID4B	mirna-gene	Predicted	Starbase		Carcinoma, Adenoid Cystic	FALSE	FALSE	1	1
hsa-mir-30a-5p	MAGI3	mirna-gene	Predicted	Starbase			FALSE	FALSE	1	1
hsa-mir-30a-5p	PALM2	mirna-gene	Predicted	Starbase			FALSE	FALSE	1	1
hsa-mir-30a-5p	CCDC120	mirna-gene	Predicted	Starbase			FALSE	FALSE	1	1
hsa-mir-30a-5p	KIAA1549	mirna-gene	Predicted	Starbase			FALSE	FALSE	1	1
hsa-mir-30a-5p	SH3PXD2A	mirna-gene	Predicted	Starbase			FALSE	FALSE	1	1
hsa-mir-30a-5p	NFAT5	mirna-gene	Predicted	Starbase			FALSE	FALSE	1	1
hsa-mir-30a-5p	PIP4K2A	mirna-gene	Predicted	Starbase			FALSE	FALSE	1	1
hsa-mir-30a-5p	KREMEN1	mirna-gene	Predicted	Starbase			FALSE	FALSE	1	1
hsa-mir-30a-5p	NAV1	mirna-gene	Predicted	Starbase			FALSE	FALSE	1	1
hsa-mir-30a-5p	PLXNA2	mirna-gene	Predicted	Starbase		Schizophrenia	FALSE	FALSE	1	1
hsa-mir-30a-5p	GRB10	mirna-gene	Predicted	Starbase			FALSE	FALSE	1	1
hsa-mir-30a-5p	MYO5A	mirna-gene	Predicted	Starbase		Griscelli syndrome type 1, Peripheral Nervous System Diseases	FALSE	FALSE	1	1
hsa-mir-30a-5p	RARG	mirna-gene	Predicted	Starbase		Cleft Palate, Musculoskeletal Abnormalities	FALSE	FALSE	1	1
hsa-mir-30a-5p	CLOCK	mirna-gene	Predicted	Starbase			FALSE	FALSE	1	1
hsa-mir-30a-5p	LIFR	mirna-gene	Predicted	Starbase		Stuve-Wiedemann syndrome, Polycystic Ovary Syndrome, Prostatic Neoplasms	FALSE	FALSE	1	1
hsa-mir-30a-5p	DIP2B	mirna-gene	Predicted	Starbase		Mental Retardation, Fra12a Type	FALSE	FALSE	1	1
hsa-mir-30c-5p	KIAA1549	mirna-gene	Predicted	Starbase			FALSE	FALSE	1	-1
hsa-mir-30c-5p	NAV1	mirna-gene	Predicted	Starbase			FALSE	FALSE	1	-1
hsa-mir-30c-5p	CCDC120	mirna-gene	Predicted	Starbase			FALSE	FALSE	1	-1
hsa-mir-30c-5p	PLXNA2	mirna-gene	Predicted	Starbase		Schizophrenia	FALSE	FALSE	1	-1
hsa-mir-30c-5p	DIP2B	mirna-gene	Predicted	Starbase		Mental Retardation, Fra12a Type	FALSE	FALSE	1	-1
hsa-mir-30c-5p	MYO5A	mirna-gene	Predicted	Starbase		Griscelli syndrome type 1, Peripheral Nervous System Diseases	FALSE	FALSE	1	-1
hsa-mir-30c-5p	CLOCK	mirna-gene	Predicted	Starbase			FALSE	FALSE	1	-1
hsa-mir-30c-5p	PDE4D	mirna-gene	Predicted	Starbase		Stroke, Asthma, Amphetamine-Related Disorders, Prostatic Neoplasms	FALSE	FALSE	1	-1
hsa-mir-30c-5p	SH3PXD2A	mirna-gene	Predicted	Starbase			FALSE	FALSE	1	-1
hsa-mir-30c-5p	PIP4K2A	mirna-gene	Predicted	Starbase			FALSE	FALSE	1	-1
hsa-mir-30c-5p	PALM2	mirna-gene	Predicted	Starbase			FALSE	FALSE	1	-1
hsa-mir-30c-5p	GRB10	mirna-gene	Predicted	Starbase			FALSE	FALSE	1	-1
hsa-mir-30c-5p	RARG	mirna-gene	Predicted	Starbase		Cleft Palate, Musculoskeletal Abnormalities	FALSE	FALSE	1	-1
hsa-mir-30c-5p	LIFR	mirna-gene	Predicted	Starbase		Stuve-Wiedemann syndrome, Polycystic Ovary Syndrome, Prostatic Neoplasms	FALSE	FALSE	1	-1
hsa-mir-30c-5p	ARID4B	mirna-gene	Predicted	Starbase		Carcinoma, Adenoid Cystic	FALSE	FALSE	1	-1
hsa-mir-30c-5p	KREMEN1	mirna-gene	Predicted	Starbase			FALSE	FALSE	1	-1
hsa-mir-30c-5p	NFAT5	mirna-gene	Predicted	Starbase			FALSE	FALSE	1	-1
hsa-mir-30e-5p	ARID4B	mirna-gene	Predicted	Starbase		Carcinoma, Adenoid Cystic	FALSE	FALSE	1	1
hsa-mir-30e-5p	CLOCK	mirna-gene	Predicted	Starbase			FALSE	FALSE	1	1
hsa-mir-30e-5p	NFAT5	mirna-gene	Predicted	Starbase			FALSE	FALSE	1	1
hsa-mir-30e-5p	LIFR	mirna-gene	Predicted	Starbase		Stuve-Wiedemann syndrome, Polycystic Ovary Syndrome, Prostatic Neoplasms	FALSE	FALSE	1	1
hsa-mir-30e-5p	SH3PXD2A	mirna-gene	Predicted	Starbase			FALSE	FALSE	1	1
hsa-mir-30e-5p	PALM2	mirna-gene	Predicted	Starbase			FALSE	FALSE	1	1
hsa-mir-30e-5p	RARG	mirna-gene	Predicted	Starbase		Cleft Palate, Musculoskeletal Abnormalities	FALSE	FALSE	1	1
hsa-mir-30e-5p	PDE4D	mirna-gene	Predicted	Starbase		Stroke, Asthma, Amphetamine-Related Disorders, Prostatic Neoplasms	FALSE	FALSE	1	1
hsa-mir-30e-5p	MYO5A	mirna-gene	Predicted	Starbase		Griscelli syndrome type 1, Peripheral Nervous System Diseases	FALSE	FALSE	1	1
hsa-mir-30e-5p	PIP4K2A	mirna-gene	Predicted	Starbase			FALSE	FALSE	1	1
hsa-mir-30e-5p	GRB10	mirna-gene	Predicted	Starbase			FALSE	FALSE	1	1
hsa-mir-30e-5p	DIP2B	mirna-gene	Predicted	Starbase		Mental Retardation, Fra12a Type	FALSE	FALSE	1	1
hsa-mir-30e-5p	KIAA1549	mirna-gene	Predicted	Starbase			FALSE	FALSE	1	1
hsa-mir-30e-5p	CCDC120	mirna-gene	Predicted	Starbase			FALSE	FALSE	1	1
hsa-mir-30e-5p	PLXNA2	mirna-gene	Predicted	Starbase		Schizophrenia	FALSE	FALSE	1	1
hsa-mir-34c-5p	ANKRD52	mirna-gene	Predicted	Starbase			FALSE	FALSE	1	-1
hsa-mir-34c-5p	ARID4B	mirna-gene	Predicted	Starbase		Carcinoma, Adenoid Cystic	FALSE	FALSE	1	-1
hsa-mir-34c-5p	hsa-mir-196b	mirna-mirna	Predicted	Pmmr		Neoplasms, Endometriosis, Hepatitis C, Leukemia, Neutropenia, Leukemia, Myeloid, Acute, Leukemia, Myeloid, Acute, Leukemia, Lymphocytic, Chronic, B-Cell, Adenoviridae Infections, Prostatic Neoplasms, Crohn Disease, Urinary Bladder Neoplasms, Hepatitis C, Leukemia, Myeloid, Acute, Glioblastoma, Precursor Cell Lymphoblastic Leukemia-Lymphoma, Pancreatic Neoplasms, Stomach Neoplasms, Leukemia, Gliob…	FALSE	FALSE	-1	-1
hsa-mir-92a-3p	BMPR2	mirna-gene	Experimental	mirtarbase		Pulmonary arterial hypertension, Hypertension, Pulmonary, Pulmonary Veno-Occlusive Disease, Hyperandrogenism	FALSE	FALSE	1	-1
hsa-mir-92a-3p	DUSP10	mirna-gene	Predicted	Starbase		Inflammation	FALSE	FALSE	1	-1
hsa-mir-92a-3p	ARID4B	mirna-gene	Experimental	mirtarbase		Carcinoma, Adenoid Cystic	FALSE	FALSE	1	-1
hsa-mir-92a-3p	SH3PXD2A	mirna-gene	Predicted	Starbase			FALSE	FALSE	1	-1
hsa-mir-92a-3p	HIPK3	mirna-gene	Experimental	mirtarbase			FALSE	FALSE	1	-1
hsa-mir-92a-3p	SLC12A5	mirna-gene	Predicted	Starbase		Epilepsy, Seizures, Epilepsy, Temporal Lobe, Status Epilepticus, Hyperalgesia	FALSE	FALSE	1	-1
hsa-mir-92a-3p	MAN2A1	mirna-gene	Predicted	Starbase			FALSE	FALSE	1	-1
hsa-mir-92a-3p	OSBPL2	mirna-gene	Experimental	mirtarbase			FALSE	FALSE	1	-1
hsa-mir-92a-3p	NFAT5	mirna-gene	Predicted	Starbase			FALSE	FALSE	1	-1
hsa-mir-92a-3p	ATXN1	mirna-gene	Predicted	Starbase		Spinocerebellar Ataxias	FALSE	FALSE	1	-1
hsa-mir-92a-3p	DOCK5	mirna-gene	Predicted	Starbase			FALSE	FALSE	1	-1
hsa-mir-92a-3p	MYO5A	mirna-gene	Predicted	Starbase		Griscelli syndrome type 1, Peripheral Nervous System Diseases	FALSE	FALSE	1	-1
hsa-mir-92b-3p	SH3PXD2A	mirna-gene	Predicted	Starbase			FALSE	FALSE	1	-1
hsa-mir-92b-3p	MAN2A1	mirna-gene	Predicted	Starbase			FALSE	FALSE	1	-1
hsa-mir-92b-3p	SLC12A5	mirna-gene	Predicted	Starbase		Epilepsy, Seizures, Epilepsy, Temporal Lobe, Status Epilepticus, Hyperalgesia	FALSE	FALSE	1	-1
hsa-mir-92b-3p	DUSP10	mirna-gene	Predicted	Starbase		Inflammation	FALSE	FALSE	1	-1
hsa-mir-92b-3p	DOCK5	mirna-gene	Predicted	Starbase			FALSE	FALSE	1	-1
hsa-mir-92b-3p	BMPR2	mirna-gene	Predicted	Starbase		Pulmonary arterial hypertension, Hypertension, Pulmonary, Pulmonary Veno-Occlusive Disease, Hyperandrogenism	FALSE	FALSE	1	-1
hsa-mir-92b-3p	HIPK3	mirna-gene	Predicted	Starbase			FALSE	FALSE	1	-1
hsa-mir-92b-3p	NFAT5	mirna-gene	Predicted	Starbase			FALSE	FALSE	1	-1
hsa-mir-92b-3p	MYO5A	mirna-gene	Predicted	Starbase		Griscelli syndrome type 1, Peripheral Nervous System Diseases	FALSE	FALSE	1	-1
hsa-mir-92b-3p	ATXN1	mirna-gene	Predicted	Starbase		Spinocerebellar Ataxias	FALSE	FALSE	1	-1

## Sheet: Table S2.5-TiBP-exp+predic
regulator	target	category	evidence	source	regulator.association.disease	target.association.disease	is_regulator_in_disease	is_target_in_disease	target.reg	regulator.reg
ATF3	ASNS	tf-gene	Predicted	TRED	Hypospadias, Prostatic Neoplasms, Carcinoma, Non-Small-Cell Lung, Diabetes Mellitus, Type 2, Influenza, Human, Liver Neoplasms, Diabetes Mellitus, Experimental, Infarction, Middle Cerebral Artery, Nervous System Diseases, Ovarian Neoplasms, Peripheral Nervous System Diseases	Lipidoses	FALSE	FALSE	1	1
ATF3	ATF3	tf-gene	Experimental	Transfac	Hypospadias, Prostatic Neoplasms, Carcinoma, Non-Small-Cell Lung, Diabetes Mellitus, Type 2, Influenza, Human, Liver Neoplasms, Diabetes Mellitus, Experimental, Infarction, Middle Cerebral Artery, Nervous System Diseases, Ovarian Neoplasms, Peripheral Nervous System Diseases	Hypospadias, Prostatic Neoplasms, Carcinoma, Non-Small-Cell Lung, Diabetes Mellitus, Type 2, Influenza, Human, Liver Neoplasms, Diabetes Mellitus, Experimental, Infarction, Middle Cerebral Artery, Nervous System Diseases, Ovarian Neoplasms, Peripheral Nervous System Diseases	FALSE	FALSE	1	1
BCL3	hsa-mir-21	tf-mirna	Predicted	Chipbase		Brain Neoplasms, Brain Neoplasms, Breast Neoplasms, Breast Neoplasms, Breast Neoplasms, Breast Neoplasms, Breast Neoplasms, Cholangiocarcinoma, Colonic Neoplasms, Dermatitis, Atopic, Focal Epithelial Hyperplasia, Glioblastoma, Glioblastoma, Glioblastoma, Glioblastoma, Glioblastoma, Glioblastoma, Heart Diseases, Heart Failure, Lung Neoplasms, Lung Neoplasms, Lymphoma, Large B-Cell, Diffuse, Muscul…	FALSE	FALSE	1	1
BCL3	hsa-mir-146a	tf-mirna	Predicted	Chipbase		Breast Neoplasms, Leukemia, Lymphocytic, Chronic, B-Cell, Lung Neoplasms, Muscular Disorders, Atrophic, Pancreatic Neoplasms, Prostatic Neoplasms, Psoriasis, Psoriasis, Thyroid Neoplasms, Thyroid Neoplasms, Thyroid Neoplasms, Thyroid Neoplasms, Thyroid Neoplasms, Lymphoma, B-Cell, Burkitt Lymphoma, Eczema, Alzheimer Disease, Autistic Disorder, Breast Neoplasms, Breast Neoplasms, Breast Neoplasms,…	FALSE	FALSE	1	1
BDP1	hsa-mir-187	tf-mirna	Predicted	Chipbase		Leukemia, Lymphocytic, Chronic, B-Cell, Reperfusion Injury, Ovarian Neoplasms, Carcinoma, Hepatocellular, Stomach Neoplasms, Rhinitis, Allergic, Perennial, Breast Neoplasms	FALSE	FALSE	-1	1
BDP1	hsa-mir-21	tf-mirna	Predicted	Chipbase		Brain Neoplasms, Brain Neoplasms, Breast Neoplasms, Breast Neoplasms, Breast Neoplasms, Breast Neoplasms, Breast Neoplasms, Cholangiocarcinoma, Colonic Neoplasms, Dermatitis, Atopic, Focal Epithelial Hyperplasia, Glioblastoma, Glioblastoma, Glioblastoma, Glioblastoma, Glioblastoma, Glioblastoma, Heart Diseases, Heart Failure, Lung Neoplasms, Lung Neoplasms, Lymphoma, Large B-Cell, Diffuse, Muscul…	FALSE	FALSE	1	1
BDP1	hsa-mir-18a	tf-mirna	Predicted	Chipbase		Carcinoma, Hepatocellular, Carcinoma, Hepatocellular, Colonic Neoplasms, Hematologic Neoplasms, Leukemia, B-Cell, Leukemia, B-Cell, Leukemia, B-Cell, Leukemia, B-Cell, Lung Neoplasms, Lung Neoplasms, Lung Neoplasms, Lymphoma, Lymphoma, Lymphoma, B-Cell, Neoplasms, Ovarian Neoplasms, Melanoma, Breast Neoplasms, Ovarian Neoplasms, Lymphoma, B-Cell, Colorectal Neoplasms, Stomach Neoplasms, Head and …	FALSE	FALSE	1	1
BDP1	hsa-mir-301a	tf-mirna	Predicted	Chipbase		Salivary Gland Neoplasms, Adrenocortical Carcinoma, Lung Neoplasms, Lung Neoplasms, Breast Neoplasms, Parkinson Disease, Periodontitis, Carcinoma, Hepatocellular, Demyelinating Diseases, Prostatic Neoplasms, Stomach Neoplasms, Colorectal Neoplasms, Diabetes Mellitus	FALSE	FALSE	1	1
BRF1	hsa-mir-21	tf-mirna	Predicted	Chipbase		Brain Neoplasms, Brain Neoplasms, Breast Neoplasms, Breast Neoplasms, Breast Neoplasms, Breast Neoplasms, Breast Neoplasms, Cholangiocarcinoma, Colonic Neoplasms, Dermatitis, Atopic, Focal Epithelial Hyperplasia, Glioblastoma, Glioblastoma, Glioblastoma, Glioblastoma, Glioblastoma, Glioblastoma, Heart Diseases, Heart Failure, Lung Neoplasms, Lung Neoplasms, Lymphoma, Large B-Cell, Diffuse, Muscul…	FALSE	FALSE	1	1
ETV4	NR3C2	tf-gene	Predicted	TRED	Breast Neoplasms, Prostatic Neoplasms	Hypertension, Early-Onset, Autosomal Dominant, with Severe Exacerbation in Pregnancy, PSEUDOHYPOALDOSTERONISM, TYPE I, AUTOSOMAL DOMINANT, Pseudohypoaldosteronism, Cardiomyopathy, Dilated, Heart Failure, Myocardial Infarction, Endometriosis, Ventricular Dysfunction, Left	FALSE	FALSE	1	-1
ETV4	ERBB2	tf-gene	Experimental	PMID20584335	Breast Neoplasms, Prostatic Neoplasms	Breast Neoplasms, Mammary Neoplasms, Experimental, Neoplasm Metastasis, Adenocarcinoma, Ovarian Neoplasms, Prostatic Neoplasms, Lung Neoplasms, Stomach Neoplasms, Cholangiocarcinoma, Glioma, Medulloblastoma, Colonic Neoplasms, Esophageal Neoplasms, Carcinoma, Renal Cell, Lymphatic Metastasis, Papilloma, Disease Progression, Gastrointestinal Neoplasms, Mammary Neoplasms, Animal, Neoplasm Recurrenc…	FALSE	FALSE	1	-1
FOSL1	FOSL1	tf-gene	Experimental	Transfac			FALSE	FALSE	1	1
FOXO1	IGFBP1	tf-gene	Experimental	Transfac	Rhabdomyosarcoma, Alveolar, Leukemia, Myeloid, Acute, Keratoconus	Endometriosis, Abortion, Spontaneous, Colonic Neoplasms, Drug Toxicity, Liver Cirrhosis, Biliary, Liver Cirrhosis, Experimental, Precancerous Conditions	FALSE	FALSE	1	1
FOXO1	G6PC	tf-gene	Experimental	Transfac	Rhabdomyosarcoma, Alveolar, Leukemia, Myeloid, Acute, Keratoconus	Glycogen Storage Disease Type I	FALSE	FALSE	1	1
IRF3	ISG15	tf-gene	Experimental	Transfac		Influenza, Human	FALSE	FALSE	1	1
IRF3	IRF7	tf-gene	Experimental	Transfac		Influenza, Human, Inflammation	FALSE	FALSE	1	1
IRF7	ISG15	tf-gene	Experimental	Transfac	Influenza, Human, Inflammation	Influenza, Human	FALSE	FALSE	1	1
IRF7	IRF7	tf-gene	Experimental	Transfac	Influenza, Human, Inflammation	Influenza, Human, Inflammation	FALSE	FALSE	1	1
NFIC	INSR	tf-gene	Predicted	TRED	Prostatic Neoplasms	Donohue Syndrome, Diabetes Mellitus, Insulin-Resistant, with Acanthosis Nigricans, Hyperinsulinemic Hypoglycemia, Familial, 5, Diabetes Mellitus, Type 2, Hyperinsulinism, Insulin Resistance, Hyperglycemia, Diabetes Mellitus, Experimental, Diabetic Neuropathies, Glucose Intolerance, Pineal hyperplasia AND diabetes mellitus syndrome, Parkinson Disease, Congenital diaphragmatic hernia, Hyperalgesia,…	FALSE	FALSE	1	1
NFIC	ATP1A1	tf-gene	Predicted	TRED	Prostatic Neoplasms	Hypertension, Adenoma, Hyperaldosteronism, Myocardial Ischemia, Vestibular Diseases	FALSE	FALSE	-1	1
NFIC	VWF	tf-gene	Predicted	TRED	Prostatic Neoplasms	von Willebrand Disease, Type 1, von Willebrand Disease, Type 3, von Willebrand Disease, Type 2, Thrombosis, Cardiovascular Diseases, Atrial Fibrillation, Hypertension, Intracranial Thrombosis, Peripheral Nervous System Diseases	FALSE	FALSE	-1	1
NFIC	CBS	tf-gene	Experimental	Transfac	Prostatic Neoplasms	Hyperhomocysteinemia, CYSTATHIONINE BETA-SYNTHASE, Homocystinuria, Cardiovascular Diseases, Lymphoma, Non-Hodgkin, Hypertension, Malnutrition	FALSE	FALSE	1	1
NFIC	IRF3	tf-gene	Predicted	TRED	Prostatic Neoplasms		FALSE	FALSE	1	1
NFIC	MBL2	tf-gene	Predicted	TRED	Prostatic Neoplasms	Infection, HIV Infections, Premature Birth, Diabetes, Gestational, Birth Weight, Peripheral Nervous System Diseases	FALSE	FALSE	-1	1
NFIC	HMOX1	tf-gene	Predicted	TRED	Prostatic Neoplasms	Hypertension, Ischemia, Myocardial Ischemia, Reperfusion Injury, Colitis, Diabetes Mellitus, Experimental, Liver Cirrhosis, Experimental, Status Epilepticus, Alzheimer Disease, Coronary Artery Disease, Diabetes Mellitus, Type 2, Parkinson Disease, Inflammation, Asthma, Stomach Neoplasms, Pulmonary Disease, Chronic Obstructive, Breast Neoplasms, Pneumonia, Obesity, Fibrosis, Hyperplasia, Wounds an…	FALSE	FALSE	1	1
NFIC	MATN1	tf-gene	Predicted	TRED	Prostatic Neoplasms		FALSE	FALSE	-1	1
NFIC	SCD	tf-gene	Predicted	TRED	Prostatic Neoplasms	Carcinoma, Carcinoma, Hepatocellular, Graves Ophthalmopathy, Lipidoses, Liver Neoplasms, Mammary Neoplasms, Animal, Mammary Neoplasms, Experimental	FALSE	FALSE	1	1
NFIC	OAT	tf-gene	Predicted	TRED	Prostatic Neoplasms	ORNITHINE AMINOTRANSFERASE, Ornithine aminotransferase deficiency, Enterocolitis, Necrotizing	FALSE	FALSE	1	1
POU2F2	VIP	tf-gene	Predicted	TRED	Peripheral Nervous System Diseases	Acute Lung Injury, Prostatic Neoplasms, Autistic Disorder, Down Syndrome, Neoplasm Metastasis, Bronchial Hyperreactivity, Cognition Disorders, Edema, Erectile Dysfunction, Flushing, Hyperalgesia, Hypotension, Intellectual Disability, Pain, Rhinitis, Tachycardia, Urinary Bladder Diseases	FALSE	FALSE	-1	1
POU2F2	hsa-mir-192	tf-mirna	Predicted	Chipbase	Peripheral Nervous System Diseases	Heart Failure, Lung Neoplasms, Lung Neoplasms, Colonic Neoplasms, Adrenocortical Carcinoma, Nephrosclerosis, Adenocarcinoma, Fibrosis, Reperfusion Injury, Carcinoma, Multiple Myeloma, Lupus Erythematosus, Systemic, Retinoblastoma, Carcinoma, Hepatocellular, Pancreatic Neoplasms, Muscular Dystrophies, Drug-Induced Liver Injury, Barrett Esophagus, Carcinoma, Hepatocellular, Stomach Neoplasms, Diabe…	FALSE	FALSE	1	1
POU2F2	hsa-mir-146a	tf-mirna	Predicted	Chipbase	Peripheral Nervous System Diseases	Breast Neoplasms, Leukemia, Lymphocytic, Chronic, B-Cell, Lung Neoplasms, Muscular Disorders, Atrophic, Pancreatic Neoplasms, Prostatic Neoplasms, Psoriasis, Psoriasis, Thyroid Neoplasms, Thyroid Neoplasms, Thyroid Neoplasms, Thyroid Neoplasms, Thyroid Neoplasms, Lymphoma, B-Cell, Burkitt Lymphoma, Eczema, Alzheimer Disease, Autistic Disorder, Breast Neoplasms, Breast Neoplasms, Breast Neoplasms,…	FALSE	FALSE	1	1
POU2F2	hsa-mir-146b	tf-mirna	Predicted	Chipbase	Peripheral Nervous System Diseases	Breast Neoplasms, Leukemia, Lymphocytic, Chronic, B-Cell, Lung Neoplasms, Muscular Disorders, Atrophic, Muscular Disorders, Atrophic, Pancreatic Neoplasms, Prostatic Neoplasms, Psoriasis, Thyroid Neoplasms, Thyroid Neoplasms, Thyroid Neoplasms, Thyroid Neoplasms, Thyroid Neoplasms, Autistic Disorder, Autistic Disorder, Breast Neoplasms, Breast Neoplasms, Glioma, Head and Neck Neoplasms, Thyroid N…	FALSE	FALSE	1	1
POU2F2	hsa-mir-18a	tf-mirna	Predicted	Chipbase	Peripheral Nervous System Diseases	Carcinoma, Hepatocellular, Carcinoma, Hepatocellular, Colonic Neoplasms, Hematologic Neoplasms, Leukemia, B-Cell, Leukemia, B-Cell, Leukemia, B-Cell, Leukemia, B-Cell, Lung Neoplasms, Lung Neoplasms, Lung Neoplasms, Lymphoma, Lymphoma, Lymphoma, B-Cell, Neoplasms, Ovarian Neoplasms, Melanoma, Breast Neoplasms, Ovarian Neoplasms, Lymphoma, B-Cell, Colorectal Neoplasms, Stomach Neoplasms, Head and …	FALSE	FALSE	1	1
POU2F2	hsa-mir-301a	tf-mirna	Predicted	Chipbase	Peripheral Nervous System Diseases	Salivary Gland Neoplasms, Adrenocortical Carcinoma, Lung Neoplasms, Lung Neoplasms, Breast Neoplasms, Parkinson Disease, Periodontitis, Carcinoma, Hepatocellular, Demyelinating Diseases, Prostatic Neoplasms, Stomach Neoplasms, Colorectal Neoplasms, Diabetes Mellitus	FALSE	FALSE	1	1
POU2F2	hsa-mir-21	tf-mirna	Predicted	Chipbase	Peripheral Nervous System Diseases	Brain Neoplasms, Brain Neoplasms, Breast Neoplasms, Breast Neoplasms, Breast Neoplasms, Breast Neoplasms, Breast Neoplasms, Cholangiocarcinoma, Colonic Neoplasms, Dermatitis, Atopic, Focal Epithelial Hyperplasia, Glioblastoma, Glioblastoma, Glioblastoma, Glioblastoma, Glioblastoma, Glioblastoma, Heart Diseases, Heart Failure, Lung Neoplasms, Lung Neoplasms, Lymphoma, Large B-Cell, Diffuse, Muscul…	FALSE	FALSE	1	1
POU2F2	hsa-mir-212	tf-mirna	Predicted	Chipbase	Peripheral Nervous System Diseases	Heart Failure, Lung Neoplasms, Schizophrenia, Liver Diseases, Alcoholic, Autistic Disorder, Stomach Neoplasms, Carcinoma, Non-Small-Cell Lung, Cocaine-Related Disorders, Cocaine-Related Disorders, Urinary Bladder Neoplasms, Neoplasms, Squamous Cell, Pancreatic Neoplasms, Stomach Neoplasms, Carcinoma, Hepatocellular, Carcinoma, Non-Small-Cell Lung, Leukemia, Myelogenous, Chronic, BCR-ABL Positive,…	FALSE	FALSE	-1	1
PPARA	SEMA6B	tf-gene	Experimental	PMID20584335	Hypertension, Reperfusion Injury, Diabetes Mellitus, Type 2, Obesity, Dyslipidemias, Fatty Liver, Hyperlipidemias, Insulin Resistance, Dermatitis, Atopic, Carcinoma, Neoplasms, Inflammation, Kidney Failure, Chronic, Liver Neoplasms, Encephalomyelitis, Autoimmune, Experimental, Hepatomegaly, Hypoglycemia, Kidney Diseases, Kidney Tubular Necrosis, Acute, Muscular Diseases, Abdominal obesity metabol…		FALSE	FALSE	1	1
PPARA	FABP1	tf-gene	Predicted	TRED	Hypertension, Reperfusion Injury, Diabetes Mellitus, Type 2, Obesity, Dyslipidemias, Fatty Liver, Hyperlipidemias, Insulin Resistance, Dermatitis, Atopic, Carcinoma, Neoplasms, Inflammation, Kidney Failure, Chronic, Liver Neoplasms, Encephalomyelitis, Autoimmune, Experimental, Hepatomegaly, Hypoglycemia, Kidney Diseases, Kidney Tubular Necrosis, Acute, Muscular Diseases, Abdominal obesity metabol…	Kidney Failure, Chronic, Kidney Tubular Necrosis, Acute, Lipidoses	FALSE	FALSE	1	1
RARG	RARG	tf-gene	Experimental	Transfac	Cleft Palate, Musculoskeletal Abnormalities	Cleft Palate, Musculoskeletal Abnormalities	FALSE	FALSE	1	1
RARG	TG	tf-gene	Predicted	TRED	Cleft Palate, Musculoskeletal Abnormalities	Thyroid Dyshormonogenesis 3, Goiter, Thyroiditis, Autoimmune	FALSE	FALSE	1	1
RARG	TGM1	tf-gene	Predicted	TRED	Cleft Palate, Musculoskeletal Abnormalities	Lamellar ichthyosis, type 1, Ichthyosiform erythroderma, Brocq congenital, nonbullous form, Chloracne, Dry Eye Syndromes, Liver Diseases, Neurotoxicity Syndromes, Vitamin A Deficiency	FALSE	FALSE	-1	1
RARG	BCL2	tf-gene	Predicted	TRED	Cleft Palate, Musculoskeletal Abnormalities	Colonic Neoplasms, Reperfusion Injury, Alzheimer Disease, Diabetes Mellitus, Experimental, Erectile Dysfunction, Lymphoma, Follicular, Breast Neoplasms, Carcinoma, Lymphoma, Large B-Cell, Diffuse, Prostatic Neoplasms, Colorectal Neoplasms, Lymphoma, Non-Hodgkin, Adenocarcinoma, Esophageal Neoplasms, Azoospermia, Autistic Disorder, Sarcoma, Synovial, Multiple Myeloma, Adenoma, Diabetes Mellitus, T…	FALSE	FALSE	1	1
RBPJ	BCL3	tf-gene	Experimental	Transfac	Arthritis, Rheumatoid, Endometriosis		FALSE	FALSE	1	1
RXRA	RARG	tf-gene	Experimental	Transfac	Prostatic Neoplasms, Amyotrophic lateral sclerosis 1, Sciatic Neuropathy	Cleft Palate, Musculoskeletal Abnormalities	FALSE	FALSE	1	1
RXRA	SEMA6B	tf-gene	Experimental	PMID20584335	Prostatic Neoplasms, Amyotrophic lateral sclerosis 1, Sciatic Neuropathy		FALSE	FALSE	1	1
RXRA	INSIG1	tf-gene	Experimental	PMID20584335	Prostatic Neoplasms, Amyotrophic lateral sclerosis 1, Sciatic Neuropathy	Carcinoma, Mammary Neoplasms, Animal, Mammary Neoplasms, Experimental	FALSE	FALSE	1	1
RXRA	hsa-mir-192	tf-mirna	Predicted	Chipbase	Prostatic Neoplasms, Amyotrophic lateral sclerosis 1, Sciatic Neuropathy	Heart Failure, Lung Neoplasms, Lung Neoplasms, Colonic Neoplasms, Adrenocortical Carcinoma, Nephrosclerosis, Adenocarcinoma, Fibrosis, Reperfusion Injury, Carcinoma, Multiple Myeloma, Lupus Erythematosus, Systemic, Retinoblastoma, Carcinoma, Hepatocellular, Pancreatic Neoplasms, Muscular Dystrophies, Drug-Induced Liver Injury, Barrett Esophagus, Carcinoma, Hepatocellular, Stomach Neoplasms, Diabe…	FALSE	FALSE	1	1
RXRA	IGFBP1	tf-gene	Experimental	PMID20584335	Prostatic Neoplasms, Amyotrophic lateral sclerosis 1, Sciatic Neuropathy	Endometriosis, Abortion, Spontaneous, Colonic Neoplasms, Drug Toxicity, Liver Cirrhosis, Biliary, Liver Cirrhosis, Experimental, Precancerous Conditions	FALSE	FALSE	1	1
RXRA	hsa-mir-146b	tf-mirna	Predicted	Chipbase	Prostatic Neoplasms, Amyotrophic lateral sclerosis 1, Sciatic Neuropathy	Breast Neoplasms, Leukemia, Lymphocytic, Chronic, B-Cell, Lung Neoplasms, Muscular Disorders, Atrophic, Muscular Disorders, Atrophic, Pancreatic Neoplasms, Prostatic Neoplasms, Psoriasis, Thyroid Neoplasms, Thyroid Neoplasms, Thyroid Neoplasms, Thyroid Neoplasms, Thyroid Neoplasms, Autistic Disorder, Autistic Disorder, Breast Neoplasms, Breast Neoplasms, Glioma, Head and Neck Neoplasms, Thyroid N…	FALSE	FALSE	1	1
RXRA	hsa-mir-21	tf-mirna	Predicted	Chipbase	Prostatic Neoplasms, Amyotrophic lateral sclerosis 1, Sciatic Neuropathy	Brain Neoplasms, Brain Neoplasms, Breast Neoplasms, Breast Neoplasms, Breast Neoplasms, Breast Neoplasms, Breast Neoplasms, Cholangiocarcinoma, Colonic Neoplasms, Dermatitis, Atopic, Focal Epithelial Hyperplasia, Glioblastoma, Glioblastoma, Glioblastoma, Glioblastoma, Glioblastoma, Glioblastoma, Heart Diseases, Heart Failure, Lung Neoplasms, Lung Neoplasms, Lymphoma, Large B-Cell, Diffuse, Muscul…	FALSE	FALSE	1	1
RXRA	hsa-mir-196b	tf-mirna	Predicted	Chipbase	Prostatic Neoplasms, Amyotrophic lateral sclerosis 1, Sciatic Neuropathy	Neoplasms, Endometriosis, Hepatitis C, Leukemia, Neutropenia, Leukemia, Myeloid, Acute, Leukemia, Myeloid, Acute, Leukemia, Lymphocytic, Chronic, B-Cell, Adenoviridae Infections, Prostatic Neoplasms, Crohn Disease, Urinary Bladder Neoplasms, Hepatitis C, Leukemia, Myeloid, Acute, Glioblastoma, Precursor Cell Lymphoblastic Leukemia-Lymphoma, Pancreatic Neoplasms, Stomach Neoplasms, Leukemia, Gliob…	FALSE	FALSE	-1	1
RXRA	hsa-mir-146a	tf-mirna	Predicted	Chipbase	Prostatic Neoplasms, Amyotrophic lateral sclerosis 1, Sciatic Neuropathy	Breast Neoplasms, Leukemia, Lymphocytic, Chronic, B-Cell, Lung Neoplasms, Muscular Disorders, Atrophic, Pancreatic Neoplasms, Prostatic Neoplasms, Psoriasis, Psoriasis, Thyroid Neoplasms, Thyroid Neoplasms, Thyroid Neoplasms, Thyroid Neoplasms, Thyroid Neoplasms, Lymphoma, B-Cell, Burkitt Lymphoma, Eczema, Alzheimer Disease, Autistic Disorder, Breast Neoplasms, Breast Neoplasms, Breast Neoplasms,…	FALSE	FALSE	1	1
STAT5A	BCL2	tf-gene	Predicted	TRED	Mammary Neoplasms, Experimental, Breast Neoplasms, Adenocarcinoma, Carcinoma, Carcinoma, Ductal, Carcinoma, Intraductal, Noninfiltrating, Carcinoma, Lobular, Lung Neoplasms, Mammary Neoplasms, Animal, Myocardial Ischemia, Precancerous Conditions	Colonic Neoplasms, Reperfusion Injury, Alzheimer Disease, Diabetes Mellitus, Experimental, Erectile Dysfunction, Lymphoma, Follicular, Breast Neoplasms, Carcinoma, Lymphoma, Large B-Cell, Diffuse, Prostatic Neoplasms, Colorectal Neoplasms, Lymphoma, Non-Hodgkin, Adenocarcinoma, Esophageal Neoplasms, Azoospermia, Autistic Disorder, Sarcoma, Synovial, Multiple Myeloma, Adenoma, Diabetes Mellitus, T…	FALSE	FALSE	1	1
STAT5A	PAX5	tf-gene	Predicted	TRED	Mammary Neoplasms, Experimental, Breast Neoplasms, Adenocarcinoma, Carcinoma, Carcinoma, Ductal, Carcinoma, Intraductal, Noninfiltrating, Carcinoma, Lobular, Lung Neoplasms, Mammary Neoplasms, Animal, Myocardial Ischemia, Precancerous Conditions		FALSE	FALSE	1	1
VDR	IGFBP1	tf-gene	Experimental	PMID20584335	Vitamin D-Dependent Rickets, Type 2A, Osteoporosis, Rickets, Prostatic Neoplasms, Hypertension, Vitamin D Deficiency, Neoplasms, Alopecia, Uremia, Carcinoma, Transitional Cell, Epilepsy, Temporal Lobe, Genetic Diseases, Inborn, Leukemia, Lymphocytic, Chronic, B-Cell	Endometriosis, Abortion, Spontaneous, Colonic Neoplasms, Drug Toxicity, Liver Cirrhosis, Biliary, Liver Cirrhosis, Experimental, Precancerous Conditions	FALSE	FALSE	1	1
hsa-let-7a	BCL2	mirna-gene	Experimental	mirtarbase.adstudy	Carcinoma, Non-Small-Cell Lung, Stomach Neoplasms, Stomach Neoplasms	Colonic Neoplasms, Reperfusion Injury, Alzheimer Disease, Diabetes Mellitus, Experimental, Erectile Dysfunction, Lymphoma, Follicular, Breast Neoplasms, Carcinoma, Lymphoma, Large B-Cell, Diffuse, Prostatic Neoplasms, Colorectal Neoplasms, Lymphoma, Non-Hodgkin, Adenocarcinoma, Esophageal Neoplasms, Azoospermia, Autistic Disorder, Sarcoma, Synovial, Multiple Myeloma, Adenoma, Diabetes Mellitus, T…	FALSE	FALSE	1	-1
hsa-let-7b	DOCK5	mirna-gene	Experimental	mirtarbase.adstudy	Colonic Neoplasms, Heart Failure, Lung Neoplasms, Lung Neoplasms, Lung Neoplasms, Lung Neoplasms, Lung Neoplasms, Lung Neoplasms, Lung Neoplasms, Neoplasms, Neoplasms, Neoplasms, Ovarian Neoplasms, Neoplasms, Digestive System Neoplasms, Head and Neck Neoplasms, Neoplasms, Sarcoma, Kaposi, Lung Neoplasms, Melanoma, Pancreatic Neoplasms, Pituitary Neoplasms, Lymphoma, Primary Effusion, Adrenocortic…		FALSE	FALSE	1	-1
hsa-let-7b	SLC1A4	mirna-gene	Experimental	mirtarbase.adstudy	Colonic Neoplasms, Heart Failure, Lung Neoplasms, Lung Neoplasms, Lung Neoplasms, Lung Neoplasms, Lung Neoplasms, Lung Neoplasms, Lung Neoplasms, Neoplasms, Neoplasms, Neoplasms, Ovarian Neoplasms, Neoplasms, Digestive System Neoplasms, Head and Neck Neoplasms, Neoplasms, Sarcoma, Kaposi, Lung Neoplasms, Melanoma, Pancreatic Neoplasms, Pituitary Neoplasms, Lymphoma, Primary Effusion, Adrenocortic…		FALSE	FALSE	1	-1
hsa-let-7b	ERC1	mirna-gene	Experimental	mirtarbase.adstudy	Colonic Neoplasms, Heart Failure, Lung Neoplasms, Lung Neoplasms, Lung Neoplasms, Lung Neoplasms, Lung Neoplasms, Lung Neoplasms, Lung Neoplasms, Neoplasms, Neoplasms, Neoplasms, Ovarian Neoplasms, Neoplasms, Digestive System Neoplasms, Head and Neck Neoplasms, Neoplasms, Sarcoma, Kaposi, Lung Neoplasms, Melanoma, Pancreatic Neoplasms, Pituitary Neoplasms, Lymphoma, Primary Effusion, Adrenocortic…		FALSE	FALSE	1	-1
hsa-let-7c-5p	ADAMTS8	mirna-gene	Predicted	Starbase			FALSE	FALSE	1	-1
hsa-let-7c-5p	SLC1A4	mirna-gene	Predicted	Starbase			FALSE	FALSE	1	-1
hsa-let-7c-5p	SLC6A15	mirna-gene	Predicted	Starbase			FALSE	FALSE	1	-1
hsa-let-7c-5p	XYLT1	mirna-gene	Predicted	Starbase		Pseudoxanthoma Elasticum, Substance-Related Disorders	FALSE	FALSE	1	-1
hsa-let-7c-5p	CPEB3	mirna-gene	Predicted	Starbase			FALSE	FALSE	1	-1
hsa-let-7c-5p	TNFAIP3	mirna-gene	Predicted	Starbase		Lupus Erythematosus, Systemic, Arthritis, Rheumatoid, Psoriasis	FALSE	FALSE	1	-1
hsa-let-7c-5p	SLC5A6	mirna-gene	Predicted	Starbase			FALSE	FALSE	1	-1
hsa-let-7c-5p	APBB3	mirna-gene	Predicted	Starbase			FALSE	FALSE	1	-1
hsa-let-7c-5p	TNFRSF1B	mirna-gene	Predicted	Starbase		Diabetes Mellitus, Type 2, Obesity, Pneumonia, Autistic Disorder, Brain Ischemia, Fractures, Bone, Hypersensitivity, Hypoalbuminemia, Liver Cirrhosis, Non-alcoholic Fatty Liver Disease	FALSE	FALSE	1	-1
hsa-let-7c-5p	SCD	mirna-gene	Predicted	Starbase		Carcinoma, Carcinoma, Hepatocellular, Graves Ophthalmopathy, Lipidoses, Liver Neoplasms, Mammary Neoplasms, Animal, Mammary Neoplasms, Experimental	FALSE	FALSE	1	-1
hsa-let-7c-5p	PPP1R15B	mirna-gene	Predicted	Starbase			FALSE	FALSE	1	-1
hsa-let-7c-5p	KLHL13	mirna-gene	Predicted	Starbase			FALSE	FALSE	-1	-1
hsa-let-7c-5p	INSR	mirna-gene	Predicted	Starbase		Donohue Syndrome, Diabetes Mellitus, Insulin-Resistant, with Acanthosis Nigricans, Hyperinsulinemic Hypoglycemia, Familial, 5, Diabetes Mellitus, Type 2, Hyperinsulinism, Insulin Resistance, Hyperglycemia, Diabetes Mellitus, Experimental, Diabetic Neuropathies, Glucose Intolerance, Pineal hyperplasia AND diabetes mellitus syndrome, Parkinson Disease, Congenital diaphragmatic hernia, Hyperalgesia,…	FALSE	FALSE	1	-1
hsa-let-7c-5p	MXD1	mirna-gene	Predicted	Starbase		Dermatitis, Allergic Contact	FALSE	FALSE	1	-1
hsa-let-7c-5p	ONECUT2	mirna-gene	Predicted	Starbase			FALSE	FALSE	1	-1
hsa-let-7c-5p	PAPPA	mirna-gene	Predicted	Starbase		Acute Coronary Syndrome, Myocardial Infarction, Angina, Unstable, Endometriosis, Coronary Artery Disease, Infertility, Female	FALSE	FALSE	1	-1
hsa-let-7c-5p	DOT1L	mirna-gene	Predicted	Starbase			FALSE	FALSE	1	-1
hsa-let-7c-5p	KREMEN1	mirna-gene	Predicted	Starbase			FALSE	FALSE	1	-1
hsa-let-7c-5p	ELOVL4	mirna-gene	Predicted	Starbase		Stargardt disease 3	FALSE	FALSE	-1	-1
hsa-let-7c-5p	ATP2B1	mirna-gene	Predicted	Starbase		Hypertension, Cataract, Coronary Artery Disease	FALSE	FALSE	-1	-1
hsa-let-7c-5p	RBMS1	mirna-gene	Predicted	Starbase			FALSE	FALSE	1	-1
hsa-let-7c-5p	STX3	mirna-gene	Predicted	Starbase			FALSE	FALSE	-1	-1
hsa-let-7c-5p	PBX1	mirna-gene	Predicted	Starbase		Burkitt Lymphoma, Substance-Related Disorders	FALSE	FALSE	1	-1
hsa-let-7c-5p	GIPC1	mirna-gene	Predicted	Starbase			FALSE	FALSE	1	-1
hsa-let-7c-5p	TGFBR1	mirna-gene	Experimental	mirtarbase		LOEYS-DIETZ SYNDROME, TYPE 1A, Loeys-Dietz Syndrome, Type 2A, Keratoacanthoma familial, Colorectal Neoplasms, Loeys-Dietz Syndrome, Skin Neoplasms, Aneurysm, Dissecting, Abortion, Spontaneous, Auditory Neuropathy, Autosomal Dominant, 1, Uremia	FALSE	FALSE	1	-1
hsa-let-7c-5p	IGF1R	mirna-gene	Predicted	Starbase		Insulin-Like Growth Factor I, Resistance To, Parkinson Disease, Breast Neoplasms, Carcinoma, Hepatocellular, Alzheimer Disease, Fetal Growth Retardation, Congenital diaphragmatic hernia, Endometrial Neoplasms, Growth Disorders, Lewy Body Disease, Lung Diseases, Peripheral Nervous System Diseases, Respiratory Insufficiency, Skin Neoplasms	FALSE	FALSE	1	-1
hsa-let-7c-5p	BCAT1	mirna-gene	Predicted	Starbase		Weight Gain	FALSE	FALSE	1	-1
hsa-let-7c-5p	PRTG	mirna-gene	Predicted	Starbase			FALSE	FALSE	1	-1
hsa-let-7d-5p	GIPC1	mirna-gene	Predicted	Starbase			FALSE	FALSE	1	-1
hsa-let-7d-5p	SLC5A6	mirna-gene	Predicted	Starbase			FALSE	FALSE	1	-1
hsa-let-7d-5p	KREMEN1	mirna-gene	Predicted	Starbase			FALSE	FALSE	1	-1
hsa-let-7d-5p	SLC6A15	mirna-gene	Predicted	Starbase			FALSE	FALSE	1	-1
hsa-let-7d-5p	ONECUT2	mirna-gene	Predicted	Starbase			FALSE	FALSE	1	-1
hsa-let-7d-5p	PPP1R15B	mirna-gene	Predicted	Starbase			FALSE	FALSE	1	-1
hsa-let-7d-5p	PRTG	mirna-gene	Predicted	Starbase			FALSE	FALSE	1	-1
hsa-let-7d-5p	ADAMTS8	mirna-gene	Predicted	Starbase			FALSE	FALSE	1	-1
hsa-let-7d-5p	CPEB3	mirna-gene	Predicted	Starbase			FALSE	FALSE	1	-1
hsa-let-7d-5p	PBX1	mirna-gene	Predicted	Starbase		Burkitt Lymphoma, Substance-Related Disorders	FALSE	FALSE	1	-1
hsa-let-7d-5p	ELOVL4	mirna-gene	Predicted	Starbase		Stargardt disease 3	FALSE	FALSE	-1	-1
hsa-let-7d-5p	SLC1A4	mirna-gene	Predicted	Starbase			FALSE	FALSE	1	-1
hsa-let-7d-5p	ATP2B1	mirna-gene	Predicted	Starbase		Hypertension, Cataract, Coronary Artery Disease	FALSE	FALSE	-1	-1
hsa-let-7d-5p	APBB3	mirna-gene	Predicted	Starbase			FALSE	FALSE	1	-1
hsa-let-7d-5p	TNFRSF1B	mirna-gene	Predicted	Starbase		Diabetes Mellitus, Type 2, Obesity, Pneumonia, Autistic Disorder, Brain Ischemia, Fractures, Bone, Hypersensitivity, Hypoalbuminemia, Liver Cirrhosis, Non-alcoholic Fatty Liver Disease	FALSE	FALSE	1	-1
hsa-let-7d-5p	SCD	mirna-gene	Predicted	Starbase		Carcinoma, Carcinoma, Hepatocellular, Graves Ophthalmopathy, Lipidoses, Liver Neoplasms, Mammary Neoplasms, Animal, Mammary Neoplasms, Experimental	FALSE	FALSE	1	-1
hsa-let-7d-5p	PAPPA	mirna-gene	Predicted	Starbase		Acute Coronary Syndrome, Myocardial Infarction, Angina, Unstable, Endometriosis, Coronary Artery Disease, Infertility, Female	FALSE	FALSE	1	-1
hsa-let-7d-5p	RBMS1	mirna-gene	Predicted	Starbase			FALSE	FALSE	1	-1
hsa-let-7d-5p	INSR	mirna-gene	Predicted	Starbase		Donohue Syndrome, Diabetes Mellitus, Insulin-Resistant, with Acanthosis Nigricans, Hyperinsulinemic Hypoglycemia, Familial, 5, Diabetes Mellitus, Type 2, Hyperinsulinism, Insulin Resistance, Hyperglycemia, Diabetes Mellitus, Experimental, Diabetic Neuropathies, Glucose Intolerance, Pineal hyperplasia AND diabetes mellitus syndrome, Parkinson Disease, Congenital diaphragmatic hernia, Hyperalgesia,…	FALSE	FALSE	1	-1
hsa-let-7d-5p	XYLT1	mirna-gene	Predicted	Starbase		Pseudoxanthoma Elasticum, Substance-Related Disorders	FALSE	FALSE	1	-1
hsa-let-7d-5p	TGFBR1	mirna-gene	Predicted	Starbase		LOEYS-DIETZ SYNDROME, TYPE 1A, Loeys-Dietz Syndrome, Type 2A, Keratoacanthoma familial, Colorectal Neoplasms, Loeys-Dietz Syndrome, Skin Neoplasms, Aneurysm, Dissecting, Abortion, Spontaneous, Auditory Neuropathy, Autosomal Dominant, 1, Uremia	FALSE	FALSE	1	-1
hsa-let-7d-5p	KLHL13	mirna-gene	Predicted	Starbase			FALSE	FALSE	-1	-1
hsa-let-7d-5p	BCAT1	mirna-gene	Predicted	Starbase		Weight Gain	FALSE	FALSE	1	-1
hsa-let-7d-5p	DOT1L	mirna-gene	Predicted	Starbase			FALSE	FALSE	1	-1
hsa-let-7d-5p	TNFAIP3	mirna-gene	Predicted	Starbase		Lupus Erythematosus, Systemic, Arthritis, Rheumatoid, Psoriasis	FALSE	FALSE	1	-1
hsa-let-7d-5p	STX3	mirna-gene	Predicted	Starbase			FALSE	FALSE	-1	-1
hsa-let-7d-5p	MXD1	mirna-gene	Predicted	Starbase		Dermatitis, Allergic Contact	FALSE	FALSE	1	-1
hsa-let-7d-5p	IGF1R	mirna-gene	Predicted	Starbase		Insulin-Like Growth Factor I, Resistance To, Parkinson Disease, Breast Neoplasms, Carcinoma, Hepatocellular, Alzheimer Disease, Fetal Growth Retardation, Congenital diaphragmatic hernia, Endometrial Neoplasms, Growth Disorders, Lewy Body Disease, Lung Diseases, Peripheral Nervous System Diseases, Respiratory Insufficiency, Skin Neoplasms	FALSE	FALSE	1	-1
hsa-let-7f	ESM1	mirna-gene	Experimental	mirrecords.adstudy			FALSE	FALSE	1	-1
hsa-let-7f	FDPS	mirna-gene	Experimental	mirrecords.adstudy			FALSE	FALSE	1	-1
hsa-mir-125a	ERBB2	mirna-gene	Experimental	tarbase.adstudy	Breast Neoplasms, Breast Neoplasms, Carcinoma, Hepatocellular, Carcinoma, Hepatocellular, Heart Failure, Lung Neoplasms, Muscular Disorders, Atrophic, Ovarian Neoplasms, Endometriosis, Leukemia, Medulloblastoma, Retinal Degeneration, Ovarian Neoplasms, Breast Neoplasms, Hepatoblastoma, Atrophy, Myelodysplastic Syndromes, Carcinoma, Non-Small-Cell Lung, Carcinoma, Non-Small-Cell Lung, Carcinoma, S…	Breast Neoplasms, Mammary Neoplasms, Experimental, Neoplasm Metastasis, Adenocarcinoma, Ovarian Neoplasms, Prostatic Neoplasms, Lung Neoplasms, Stomach Neoplasms, Cholangiocarcinoma, Glioma, Medulloblastoma, Colonic Neoplasms, Esophageal Neoplasms, Carcinoma, Renal Cell, Lymphatic Metastasis, Papilloma, Disease Progression, Gastrointestinal Neoplasms, Mammary Neoplasms, Animal, Neoplasm Recurrenc…	FALSE	FALSE	1	-1
hsa-mir-125b-5p	ATP13A3	mirna-gene	Predicted	Starbase			FALSE	FALSE	1	-1
hsa-mir-125b-5p	CPEB3	mirna-gene	Predicted	Starbase			FALSE	FALSE	1	-1
hsa-mir-125b-5p	TMEM136	mirna-gene	Predicted	Starbase			FALSE	FALSE	-1	-1
hsa-mir-125b-5p	LIFR	mirna-gene	Predicted	Starbase		Stuve-Wiedemann syndrome, Polycystic Ovary Syndrome, Prostatic Neoplasms	FALSE	FALSE	1	-1
hsa-mir-125b-5p	GRB10	mirna-gene	Predicted	Starbase			FALSE	FALSE	1	-1
hsa-mir-125b-5p	TNFAIP3	mirna-gene	Experimental	mirtarbase		Lupus Erythematosus, Systemic, Arthritis, Rheumatoid, Psoriasis	FALSE	FALSE	1	-1
hsa-mir-125b-5p	ERBB2	mirna-gene	Experimental	mirtarbase		Breast Neoplasms, Mammary Neoplasms, Experimental, Neoplasm Metastasis, Adenocarcinoma, Ovarian Neoplasms, Prostatic Neoplasms, Lung Neoplasms, Stomach Neoplasms, Cholangiocarcinoma, Glioma, Medulloblastoma, Colonic Neoplasms, Esophageal Neoplasms, Carcinoma, Renal Cell, Lymphatic Metastasis, Papilloma, Disease Progression, Gastrointestinal Neoplasms, Mammary Neoplasms, Animal, Neoplasm Recurrenc…	FALSE	FALSE	1	-1
hsa-mir-125b-5p	ABHD6	mirna-gene	Predicted	Starbase			FALSE	FALSE	1	-1
hsa-mir-125b-5p	VDR	mirna-gene	Experimental	mirtarbase		Vitamin D-Dependent Rickets, Type 2A, Osteoporosis, Rickets, Prostatic Neoplasms, Hypertension, Vitamin D Deficiency, Neoplasms, Alopecia, Uremia, Carcinoma, Transitional Cell, Epilepsy, Temporal Lobe, Genetic Diseases, Inborn, Leukemia, Lymphocytic, Chronic, B-Cell	FALSE	FALSE	1	-1
hsa-mir-125b-5p	ATXN1	mirna-gene	Predicted	Starbase		Spinocerebellar Ataxias	FALSE	FALSE	1	-1
hsa-mir-125b-5p	MAP3K10	mirna-gene	Predicted	Starbase			FALSE	FALSE	1	-1
hsa-mir-125b-5p	KLF13	mirna-gene	Experimental	mirtarbase		Endometriosis	FALSE	FALSE	1	-1
hsa-mir-125b-5p	BCL2	mirna-gene	Experimental	mirtarbase		Colonic Neoplasms, Reperfusion Injury, Alzheimer Disease, Diabetes Mellitus, Experimental, Erectile Dysfunction, Lymphoma, Follicular, Breast Neoplasms, Carcinoma, Lymphoma, Large B-Cell, Diffuse, Prostatic Neoplasms, Colorectal Neoplasms, Lymphoma, Non-Hodgkin, Adenocarcinoma, Esophageal Neoplasms, Azoospermia, Autistic Disorder, Sarcoma, Synovial, Multiple Myeloma, Adenoma, Diabetes Mellitus, T…	FALSE	FALSE	1	-1
hsa-mir-125b-5p	ADCY1	mirna-gene	Predicted	Starbase		Hyperkinesis, Small Cell Lung Carcinoma, Substance Withdrawal Syndrome	FALSE	FALSE	1	-1
hsa-mir-125b-5p	BCL3	mirna-gene	Experimental	mirtarbase			FALSE	FALSE	1	-1
hsa-mir-125b-5p	SLC7A1	mirna-gene	Predicted	Starbase		Prostatic Neoplasms	FALSE	FALSE	1	-1
hsa-mir-129-5p	KLF13	mirna-gene	Predicted	Starbase		Endometriosis	FALSE	FALSE	1	-1
hsa-mir-129-5p	CBX7	mirna-gene	Predicted	Starbase			FALSE	FALSE	1	-1
hsa-mir-129-5p	RBMS1	mirna-gene	Predicted	Starbase			FALSE	FALSE	1	-1
hsa-mir-129-5p	CPEB3	mirna-gene	Predicted	Starbase			FALSE	FALSE	1	-1
hsa-mir-129-5p	BMPR2	mirna-gene	Experimental	mirtarbase.adstudy		Pulmonary arterial hypertension, Hypertension, Pulmonary, Pulmonary Veno-Occlusive Disease, Hyperandrogenism	FALSE	FALSE	1	-1
hsa-mir-129-5p	DAB2IP	mirna-gene	Predicted	Starbase		Prostatic Neoplasms, Aortic Aneurysm, Abdominal, Lung Neoplasms, Myocardial Infarction, Peripheral Vascular Diseases, Pulmonary Embolism	FALSE	FALSE	1	-1
hsa-mir-132-3p	BBX	mirna-gene	Predicted	Starbase			FALSE	FALSE	1	-1
hsa-mir-132-3p	PUM2	mirna-gene	Predicted	Starbase			FALSE	FALSE	1	-1
hsa-mir-132-3p	ATXN1	mirna-gene	Predicted	Starbase		Spinocerebellar Ataxias	FALSE	FALSE	1	-1
hsa-mir-132-3p	DOCK4	mirna-gene	Predicted	Starbase		Autistic Disorder	FALSE	FALSE	1	-1
hsa-mir-132-3p	FOXN3	mirna-gene	Predicted	Starbase			FALSE	FALSE	1	-1
hsa-mir-138-5p	PAPPA	mirna-gene	Predicted	Starbase		Acute Coronary Syndrome, Myocardial Infarction, Angina, Unstable, Endometriosis, Coronary Artery Disease, Infertility, Female	FALSE	FALSE	1	1
hsa-mir-138-5p	IGF1R	mirna-gene	Experimental	mirtarbase		Insulin-Like Growth Factor I, Resistance To, Parkinson Disease, Breast Neoplasms, Carcinoma, Hepatocellular, Alzheimer Disease, Fetal Growth Retardation, Congenital diaphragmatic hernia, Endometrial Neoplasms, Growth Disorders, Lewy Body Disease, Lung Diseases, Peripheral Nervous System Diseases, Respiratory Insufficiency, Skin Neoplasms	FALSE	FALSE	1	1
hsa-mir-138-5p	SH2B3	mirna-gene	Predicted	Starbase		Celiac Disease, Diabetes Mellitus, Type 1, Lupus Erythematosus, Systemic, Coronary Artery Disease, Myocardial Infarction, Inflammation, Vitiligo	FALSE	FALSE	1	1
hsa-mir-138-5p	KLF11	mirna-gene	Predicted	Starbase		Maturity-Onset Diabetes of the Young, Type 7	FALSE	FALSE	-1	1
hsa-mir-138-5p	WWC1	mirna-gene	Predicted	Starbase			FALSE	FALSE	1	1
hsa-mir-138-5p	MXD1	mirna-gene	Experimental	mirtarbase		Dermatitis, Allergic Contact	FALSE	FALSE	1	1
hsa-mir-138-5p	ST6GALNAC4	mirna-gene	Predicted	Starbase			FALSE	FALSE	1	1
hsa-mir-138-5p	FERMT2	mirna-gene	Predicted	Starbase		Urinary Bladder Neoplasms	FALSE	FALSE	1	1
hsa-mir-141-3p	DOCK4	mirna-gene	Predicted	Starbase		Autistic Disorder	FALSE	FALSE	1	1
hsa-mir-141-3p	TFRC	mirna-gene	Predicted	Starbase		Abortion, Spontaneous, Anemia, Iron-Deficiency, beta-Thalassemia, Lung Neoplasms, Leukemia, Lymphocytic, Chronic, B-Cell, Obesity, Breast Neoplasms, Glioma, Lymphoma, Non-Hodgkin, Polycystic Ovary Syndrome, Arenaviridae Infections, Cell Transformation, Neoplastic, Colorectal Neoplasms, Helicobacter Infections, Inflammation, Iron Metabolism Disorders, Myocardial Ischemia, Myocardial Reperfusion In…	FALSE	FALSE	1	1
hsa-mir-141-3p	TET1	mirna-gene	Predicted	Starbase			FALSE	FALSE	1	1
hsa-mir-141-3p	ZEB1	mirna-gene	Experimental	mirtarbase		Corneal Dystrophy, Fuchs Endothelial, 6, Corneal Dystrophy, Posterior Polymorphous, 3, Breast Neoplasms, Cell Transformation, Neoplastic, Disease Progression, Myocardial Ischemia, Neoplasm Invasiveness	FALSE	FALSE	1	1
hsa-mir-141-3p	CLOCK	mirna-gene	Experimental	mirtarbase			FALSE	FALSE	1	1
hsa-mir-141-3p	APBB2	mirna-gene	Predicted	Starbase		Alzheimer Disease, Weight Gain	FALSE	FALSE	1	1
hsa-mir-141-3p	MMP24	mirna-gene	Predicted	Starbase			FALSE	FALSE	1	1
hsa-mir-141-3p	DIP2B	mirna-gene	Predicted	Starbase		Mental Retardation, Fra12a Type	FALSE	FALSE	1	1
hsa-mir-141-3p	KLF11	mirna-gene	Experimental	mirtarbase		Maturity-Onset Diabetes of the Young, Type 7	FALSE	FALSE	-1	1
hsa-mir-141-3p	FKBP5	mirna-gene	Predicted	Starbase		Depressive Disorder, Major, Arthritis, Rheumatoid, Endometriosis	FALSE	FALSE	-1	1
hsa-mir-141-3p	SLC23A2	mirna-gene	Predicted	Starbase		Cholestasis	FALSE	FALSE	1	1
hsa-mir-141-3p	ATXN1	mirna-gene	Predicted	Starbase		Spinocerebellar Ataxias	FALSE	FALSE	1	1
hsa-mir-141-3p	TOP1	mirna-gene	Predicted	Starbase		Neoplasms, Drug Toxicity	FALSE	FALSE	-1	1
hsa-mir-141-3p	PPP1R15B	mirna-gene	Predicted	Starbase			FALSE	FALSE	1	1
hsa-mir-141-3p	STXBP1	mirna-gene	Predicted	Starbase		Epileptic Encephalopathy, Early Infantile, 4, Epilepsies, Myoclonic	FALSE	FALSE	-1	1
hsa-mir-141-3p	SCD	mirna-gene	Predicted	Starbase		Carcinoma, Carcinoma, Hepatocellular, Graves Ophthalmopathy, Lipidoses, Liver Neoplasms, Mammary Neoplasms, Animal, Mammary Neoplasms, Experimental	FALSE	FALSE	1	1
hsa-mir-141-3p	PPARA	mirna-gene	Experimental	mirtarbase		Hypertension, Reperfusion Injury, Diabetes Mellitus, Type 2, Obesity, Dyslipidemias, Fatty Liver, Hyperlipidemias, Insulin Resistance, Dermatitis, Atopic, Carcinoma, Neoplasms, Inflammation, Kidney Failure, Chronic, Liver Neoplasms, Encephalomyelitis, Autoimmune, Experimental, Hepatomegaly, Hypoglycemia, Kidney Diseases, Kidney Tubular Necrosis, Acute, Muscular Diseases, Abdominal obesity metabol…	FALSE	FALSE	1	1
hsa-mir-143	DNMT3A	mirna-gene	Experimental	mirtarbase.adstudy	Breast Neoplasms, Colonic Neoplasms, Colonic Neoplasms, Colonic Neoplasms, Colonic Neoplasms, Colonic Neoplasms, Colorectal Neoplasms, Hepatitis, Chronic, Hepatitis, Chronic, Lung Neoplasms, Muscular Disorders, Atrophic, Obesity, ACTH-Secreting Pituitary Adenoma, Barrett Esophagus, Urinary Bladder Neoplasms, Uterine Cervical Neoplasms, Colorectal Neoplasms, Colorectal Neoplasms, Endometriosis, Ob…	Crohn Disease, Lung Neoplasms, Leukemia, Monocytic, Acute	FALSE	FALSE	1	1
hsa-mir-146a	CXCR4	mirna-gene	Experimental	mirtarbase.adstudy	Breast Neoplasms, Leukemia, Lymphocytic, Chronic, B-Cell, Lung Neoplasms, Muscular Disorders, Atrophic, Pancreatic Neoplasms, Prostatic Neoplasms, Psoriasis, Psoriasis, Thyroid Neoplasms, Thyroid Neoplasms, Thyroid Neoplasms, Thyroid Neoplasms, Thyroid Neoplasms, Lymphoma, B-Cell, Burkitt Lymphoma, Eczema, Alzheimer Disease, Autistic Disorder, Breast Neoplasms, Breast Neoplasms, Breast Neoplasms,…	WHIM syndrome, Neoplasm Metastasis, Neuralgia	FALSE	FALSE	1	1
hsa-mir-152	hsa-mir-143	mirna-mirna	Predicted	Pmmr	Asthma, Pre-Eclampsia, Adenocarcinoma, Carcinoma, Hepatocellular, Colonic Neoplasms, Gastrointestinal Neoplasms, Colorectal Neoplasms, Gastrointestinal Neoplasms, Endometrial Neoplasms, Endometrial Neoplasms, Ovarian Neoplasms, Pre-Eclampsia, Neuroblastoma, Atherosclerosis, Atherosclerosis, Breast Neoplasms, Glioma, Ovarian Neoplasms, Prostatic Neoplasms, Anxiety Disorders	Breast Neoplasms, Colonic Neoplasms, Colonic Neoplasms, Colonic Neoplasms, Colonic Neoplasms, Colonic Neoplasms, Colorectal Neoplasms, Hepatitis, Chronic, Hepatitis, Chronic, Lung Neoplasms, Muscular Disorders, Atrophic, Obesity, ACTH-Secreting Pituitary Adenoma, Barrett Esophagus, Urinary Bladder Neoplasms, Uterine Cervical Neoplasms, Colorectal Neoplasms, Colorectal Neoplasms, Endometriosis, Ob…	FALSE	FALSE	1	1
hsa-mir-152	hsa-mir-21	mirna-mirna	Predicted	Pmmr	Asthma, Pre-Eclampsia, Adenocarcinoma, Carcinoma, Hepatocellular, Colonic Neoplasms, Gastrointestinal Neoplasms, Colorectal Neoplasms, Gastrointestinal Neoplasms, Endometrial Neoplasms, Endometrial Neoplasms, Ovarian Neoplasms, Pre-Eclampsia, Neuroblastoma, Atherosclerosis, Atherosclerosis, Breast Neoplasms, Glioma, Ovarian Neoplasms, Prostatic Neoplasms, Anxiety Disorders	Brain Neoplasms, Brain Neoplasms, Breast Neoplasms, Breast Neoplasms, Breast Neoplasms, Breast Neoplasms, Breast Neoplasms, Cholangiocarcinoma, Colonic Neoplasms, Dermatitis, Atopic, Focal Epithelial Hyperplasia, Glioblastoma, Glioblastoma, Glioblastoma, Glioblastoma, Glioblastoma, Glioblastoma, Heart Diseases, Heart Failure, Lung Neoplasms, Lung Neoplasms, Lymphoma, Large B-Cell, Diffuse, Muscul…	FALSE	FALSE	1	1
hsa-mir-152	hsa-mir-196b	mirna-mirna	Predicted	Pmmr	Asthma, Pre-Eclampsia, Adenocarcinoma, Carcinoma, Hepatocellular, Colonic Neoplasms, Gastrointestinal Neoplasms, Colorectal Neoplasms, Gastrointestinal Neoplasms, Endometrial Neoplasms, Endometrial Neoplasms, Ovarian Neoplasms, Pre-Eclampsia, Neuroblastoma, Atherosclerosis, Atherosclerosis, Breast Neoplasms, Glioma, Ovarian Neoplasms, Prostatic Neoplasms, Anxiety Disorders	Neoplasms, Endometriosis, Hepatitis C, Leukemia, Neutropenia, Leukemia, Myeloid, Acute, Leukemia, Myeloid, Acute, Leukemia, Lymphocytic, Chronic, B-Cell, Adenoviridae Infections, Prostatic Neoplasms, Crohn Disease, Urinary Bladder Neoplasms, Hepatitis C, Leukemia, Myeloid, Acute, Glioblastoma, Precursor Cell Lymphoblastic Leukemia-Lymphoma, Pancreatic Neoplasms, Stomach Neoplasms, Leukemia, Gliob…	FALSE	FALSE	-1	1
hsa-mir-152	hsa-mir-129-3p	mirna-mirna	Predicted	Pmmr	Asthma, Pre-Eclampsia, Adenocarcinoma, Carcinoma, Hepatocellular, Colonic Neoplasms, Gastrointestinal Neoplasms, Colorectal Neoplasms, Gastrointestinal Neoplasms, Endometrial Neoplasms, Endometrial Neoplasms, Ovarian Neoplasms, Pre-Eclampsia, Neuroblastoma, Atherosclerosis, Atherosclerosis, Breast Neoplasms, Glioma, Ovarian Neoplasms, Prostatic Neoplasms, Anxiety Disorders		FALSE	FALSE	-1	1
hsa-mir-152	hsa-mir-129-5p	mirna-mirna	Predicted	Pmmr	Asthma, Pre-Eclampsia, Adenocarcinoma, Carcinoma, Hepatocellular, Colonic Neoplasms, Gastrointestinal Neoplasms, Colorectal Neoplasms, Gastrointestinal Neoplasms, Endometrial Neoplasms, Endometrial Neoplasms, Ovarian Neoplasms, Pre-Eclampsia, Neuroblastoma, Atherosclerosis, Atherosclerosis, Breast Neoplasms, Glioma, Ovarian Neoplasms, Prostatic Neoplasms, Anxiety Disorders		FALSE	FALSE	-1	1
hsa-mir-152	hsa-let-7f	mirna-mirna	Predicted	Pmmr	Asthma, Pre-Eclampsia, Adenocarcinoma, Carcinoma, Hepatocellular, Colonic Neoplasms, Gastrointestinal Neoplasms, Colorectal Neoplasms, Gastrointestinal Neoplasms, Endometrial Neoplasms, Endometrial Neoplasms, Ovarian Neoplasms, Pre-Eclampsia, Neuroblastoma, Atherosclerosis, Atherosclerosis, Breast Neoplasms, Glioma, Ovarian Neoplasms, Prostatic Neoplasms, Anxiety Disorders		FALSE	FALSE	-1	1
hsa-mir-15b-5p	RBMS1	mirna-gene	Predicted	Starbase			FALSE	FALSE	1	1
hsa-mir-15b-5p	MYO5A	mirna-gene	Predicted	Starbase		Griscelli syndrome type 1, Peripheral Nervous System Diseases	FALSE	FALSE	1	1
hsa-mir-15b-5p	WWC1	mirna-gene	Predicted	Starbase			FALSE	FALSE	1	1
hsa-mir-15b-5p	CPEB3	mirna-gene	Predicted	Starbase			FALSE	FALSE	1	1
hsa-mir-15b-5p	CHAC1	mirna-gene	Predicted	Starbase			FALSE	FALSE	1	1
hsa-mir-15b-5p	FOXO1	mirna-gene	Predicted	Starbase		Rhabdomyosarcoma, Alveolar, Leukemia, Myeloid, Acute, Keratoconus	FALSE	FALSE	1	1
hsa-mir-15b-5p	HIGD1A	mirna-gene	Predicted	Starbase			FALSE	FALSE	1	1
hsa-mir-15b-5p	BCL2	mirna-gene	Experimental	mirtarbase		Colonic Neoplasms, Reperfusion Injury, Alzheimer Disease, Diabetes Mellitus, Experimental, Erectile Dysfunction, Lymphoma, Follicular, Breast Neoplasms, Carcinoma, Lymphoma, Large B-Cell, Diffuse, Prostatic Neoplasms, Colorectal Neoplasms, Lymphoma, Non-Hodgkin, Adenocarcinoma, Esophageal Neoplasms, Azoospermia, Autistic Disorder, Sarcoma, Synovial, Multiple Myeloma, Adenoma, Diabetes Mellitus, T…	FALSE	FALSE	1	1
hsa-mir-15b-5p	SLC41A2	mirna-gene	Predicted	Starbase			FALSE	FALSE	1	1
hsa-mir-15b-5p	MAP4	mirna-gene	Predicted	Starbase		Weight Gain	FALSE	FALSE	1	1
hsa-mir-15b-5p	FERMT2	mirna-gene	Predicted	Starbase		Urinary Bladder Neoplasms	FALSE	FALSE	1	1
hsa-mir-15b-5p	ATP13A3	mirna-gene	Predicted	Starbase			FALSE	FALSE	1	1
hsa-mir-15b-5p	STXBP1	mirna-gene	Predicted	Starbase		Epileptic Encephalopathy, Early Infantile, 4, Epilepsies, Myoclonic	FALSE	FALSE	-1	1
hsa-mir-15b-5p	DOCK4	mirna-gene	Predicted	Starbase		Autistic Disorder	FALSE	FALSE	1	1
hsa-mir-15b-5p	NAV1	mirna-gene	Predicted	Starbase			FALSE	FALSE	1	1
hsa-mir-15b-5p	PAPPA	mirna-gene	Predicted	Starbase		Acute Coronary Syndrome, Myocardial Infarction, Angina, Unstable, Endometriosis, Coronary Artery Disease, Infertility, Female	FALSE	FALSE	1	1
hsa-mir-15b-5p	INSR	mirna-gene	Predicted	Starbase		Donohue Syndrome, Diabetes Mellitus, Insulin-Resistant, with Acanthosis Nigricans, Hyperinsulinemic Hypoglycemia, Familial, 5, Diabetes Mellitus, Type 2, Hyperinsulinism, Insulin Resistance, Hyperglycemia, Diabetes Mellitus, Experimental, Diabetic Neuropathies, Glucose Intolerance, Pineal hyperplasia AND diabetes mellitus syndrome, Parkinson Disease, Congenital diaphragmatic hernia, Hyperalgesia,…	FALSE	FALSE	1	1
hsa-mir-15b-5p	WNT3A	mirna-gene	Predicted	Starbase			FALSE	FALSE	1	1
hsa-mir-15b-5p	ITGA2	mirna-gene	Predicted	Starbase		Endometriosis, Gliosis, Hyperalgesia, Retinal Vein Occlusion	FALSE	FALSE	1	1
hsa-mir-15b-5p	FASN	mirna-gene	Predicted	Starbase		Breast Neoplasms, Obesity, Neoplasms, Carcinoma, Hepatocellular, Melanoma, Liposarcoma, Ovarian Neoplasms, Kidney Failure, Chronic	FALSE	FALSE	1	1
hsa-mir-15b-5p	SLC25A22	mirna-gene	Predicted	Starbase		Epileptic Encephalopathy, Early Infantile, 3	FALSE	FALSE	1	1
hsa-mir-15b-5p	HMBOX1	mirna-gene	Predicted	Starbase			FALSE	FALSE	1	1
hsa-mir-15b-5p	TLL1	mirna-gene	Predicted	Starbase		Atrial Septal Defect 6	FALSE	FALSE	1	1
hsa-mir-15b-5p	TGFBR3	mirna-gene	Predicted	Starbase			FALSE	FALSE	1	1
hsa-mir-15b-5p	IGF2R	mirna-gene	Predicted	Starbase		Carcinoma, Hepatocellular, Alzheimer Disease, Congenital diaphragmatic hernia, Lewy Body Disease, Lung Diseases, Parkinson Disease	FALSE	FALSE	1	1
hsa-mir-15b-5p	PLXNA2	mirna-gene	Predicted	Starbase		Schizophrenia	FALSE	FALSE	1	1
hsa-mir-15b-5p	NFE2L1	mirna-gene	Predicted	Starbase			FALSE	FALSE	1	1
hsa-mir-15b-5p	SCN8A	mirna-gene	Predicted	Starbase		Epilepsy, Nervous System Diseases, Ataxia, Intellectual Disability, Tremor, EPILEPTIC ENCEPHALOPATHY, EARLY INFANTILE, 13, Cerebellar Ataxia, Herpesviridae Infections, Neuralgia, Postherpetic, Status Epilepticus	FALSE	FALSE	1	1
hsa-mir-15b-5p	ONECUT2	mirna-gene	Predicted	Starbase			FALSE	FALSE	1	1
hsa-mir-15b-5p	AMOTL1	mirna-gene	Predicted	Starbase			FALSE	FALSE	1	1
hsa-mir-15b-5p	AATK	mirna-gene	Predicted	Starbase			FALSE	FALSE	1	1
hsa-mir-15b-5p	RNF217	mirna-gene	Predicted	Starbase			FALSE	FALSE	1	1
hsa-mir-15b-5p	AGAP3	mirna-gene	Predicted	Starbase			FALSE	FALSE	1	1
hsa-mir-15b-5p	MAFK	mirna-gene	Predicted	Starbase			FALSE	FALSE	1	1
hsa-mir-15b-5p	FAT3	mirna-gene	Predicted	Starbase			FALSE	FALSE	1	1
hsa-mir-15b-5p	CRIM1	mirna-gene	Predicted	Starbase			FALSE	FALSE	1	1
hsa-mir-181b-5p	TNS1	mirna-gene	Predicted	Starbase			FALSE	FALSE	1	-1
hsa-mir-181b-5p	MAP3K10	mirna-gene	Experimental	mirtarbase			FALSE	FALSE	1	-1
hsa-mir-181b-5p	DIP2B	mirna-gene	Predicted	Starbase		Mental Retardation, Fra12a Type	FALSE	FALSE	1	-1
hsa-mir-181b-5p	SLC19A2	mirna-gene	Predicted	Starbase		Thiamine responsive megaloblastic anemia syndrome	FALSE	FALSE	1	-1
hsa-mir-181b-5p	BCL2	mirna-gene	Experimental	mirtarbase		Colonic Neoplasms, Reperfusion Injury, Alzheimer Disease, Diabetes Mellitus, Experimental, Erectile Dysfunction, Lymphoma, Follicular, Breast Neoplasms, Carcinoma, Lymphoma, Large B-Cell, Diffuse, Prostatic Neoplasms, Colorectal Neoplasms, Lymphoma, Non-Hodgkin, Adenocarcinoma, Esophageal Neoplasms, Azoospermia, Autistic Disorder, Sarcoma, Synovial, Multiple Myeloma, Adenoma, Diabetes Mellitus, T…	FALSE	FALSE	1	-1
hsa-mir-181b-5p	PBX1	mirna-gene	Predicted	Starbase		Burkitt Lymphoma, Substance-Related Disorders	FALSE	FALSE	1	-1
hsa-mir-181b-5p	TMEM64	mirna-gene	Predicted	Starbase			FALSE	FALSE	1	-1
hsa-mir-181b-5p	MAT2A	mirna-gene	Predicted	Starbase			FALSE	FALSE	1	-1
hsa-mir-181b-5p	SLC25A37	mirna-gene	Predicted	Starbase		Anemia	FALSE	FALSE	1	-1
hsa-mir-181b-5p	ABI1	mirna-gene	Predicted	Starbase			FALSE	FALSE	1	-1
hsa-mir-181b-5p	PRTG	mirna-gene	Predicted	Starbase			FALSE	FALSE	1	-1
hsa-mir-181b-5p	NR6A1	mirna-gene	Predicted	Starbase			FALSE	FALSE	1	-1
hsa-mir-181b-5p	ATXN1	mirna-gene	Predicted	Starbase		Spinocerebellar Ataxias	FALSE	FALSE	1	-1
hsa-mir-181b-5p	ADCY1	mirna-gene	Predicted	Starbase		Hyperkinesis, Small Cell Lung Carcinoma, Substance Withdrawal Syndrome	FALSE	FALSE	1	-1
hsa-mir-181b-5p	ONECUT2	mirna-gene	Predicted	Starbase			FALSE	FALSE	1	-1
hsa-mir-181b-5p	FAM160A1	mirna-gene	Predicted	Starbase			FALSE	FALSE	1	-1
hsa-mir-181b-5p	TMEM132B	mirna-gene	Predicted	Starbase		Melanoma	FALSE	FALSE	-1	-1
hsa-mir-181b-5p	ANKRD52	mirna-gene	Predicted	Starbase			FALSE	FALSE	1	-1
hsa-mir-181b-5p	DUSP10	mirna-gene	Predicted	Starbase		Inflammation	FALSE	FALSE	1	-1
hsa-mir-181b-5p	IGF1R	mirna-gene	Experimental	mirtarbase		Insulin-Like Growth Factor I, Resistance To, Parkinson Disease, Breast Neoplasms, Carcinoma, Hepatocellular, Alzheimer Disease, Fetal Growth Retardation, Congenital diaphragmatic hernia, Endometrial Neoplasms, Growth Disorders, Lewy Body Disease, Lung Diseases, Peripheral Nervous System Diseases, Respiratory Insufficiency, Skin Neoplasms	FALSE	FALSE	1	-1
hsa-mir-181b-5p	PALM2	mirna-gene	Predicted	Starbase			FALSE	FALSE	1	-1
hsa-mir-181b-5p	SCD	mirna-gene	Predicted	Starbase		Carcinoma, Carcinoma, Hepatocellular, Graves Ophthalmopathy, Lipidoses, Liver Neoplasms, Mammary Neoplasms, Animal, Mammary Neoplasms, Experimental	FALSE	FALSE	1	-1
hsa-mir-181b-5p	CBX7	mirna-gene	Experimental	mirtarbase			FALSE	FALSE	1	-1
hsa-mir-181b-5p	PPARA	mirna-gene	Predicted	Starbase		Hypertension, Reperfusion Injury, Diabetes Mellitus, Type 2, Obesity, Dyslipidemias, Fatty Liver, Hyperlipidemias, Insulin Resistance, Dermatitis, Atopic, Carcinoma, Neoplasms, Inflammation, Kidney Failure, Chronic, Liver Neoplasms, Encephalomyelitis, Autoimmune, Experimental, Hepatomegaly, Hypoglycemia, Kidney Diseases, Kidney Tubular Necrosis, Acute, Muscular Diseases, Abdominal obesity metabol…	FALSE	FALSE	1	-1
hsa-mir-181b-5p	ADARB1	mirna-gene	Predicted	Starbase		Polycystic Ovary Syndrome	FALSE	FALSE	1	-1
hsa-mir-181b-5p	GRB10	mirna-gene	Predicted	Starbase			FALSE	FALSE	1	-1
hsa-mir-181b-5p	KLHL29	mirna-gene	Predicted	Starbase			FALSE	FALSE	1	-1
hsa-mir-181b-5p	FAM160A1	mirna-gene	Predicted	Starbase			FALSE	FALSE	-1	-1
hsa-mir-181b-5p	CRIM1	mirna-gene	Predicted	Starbase			FALSE	FALSE	1	-1
hsa-mir-181b-5p	DOCK4	mirna-gene	Predicted	Starbase		Autistic Disorder	FALSE	FALSE	1	-1
hsa-mir-181b-5p	BMPR2	mirna-gene	Predicted	Starbase		Pulmonary arterial hypertension, Hypertension, Pulmonary, Pulmonary Veno-Occlusive Disease, Hyperandrogenism	FALSE	FALSE	1	-1
hsa-mir-181b-5p	TGFBR1	mirna-gene	Predicted	Starbase		LOEYS-DIETZ SYNDROME, TYPE 1A, Loeys-Dietz Syndrome, Type 2A, Keratoacanthoma familial, Colorectal Neoplasms, Loeys-Dietz Syndrome, Skin Neoplasms, Aneurysm, Dissecting, Abortion, Spontaneous, Auditory Neuropathy, Autosomal Dominant, 1, Uremia	FALSE	FALSE	1	-1
hsa-mir-181b-5p	RNF182	mirna-gene	Predicted	Starbase		Breast Neoplasms, Colorectal Neoplasms	FALSE	FALSE	-1	-1
hsa-mir-181b-5p	HOXD1	mirna-gene	Predicted	Starbase		Colorectal Neoplasms, Hyperalgesia, Ovarian Neoplasms, Pain	FALSE	FALSE	1	-1
hsa-mir-181b-5p	ATP2B1	mirna-gene	Predicted	Starbase		Hypertension, Cataract, Coronary Artery Disease	FALSE	FALSE	-1	-1
hsa-mir-181c-5p	ATP2B1	mirna-gene	Predicted	Starbase		Hypertension, Cataract, Coronary Artery Disease	FALSE	FALSE	-1	-1
hsa-mir-181c-5p	DIP2B	mirna-gene	Predicted	Starbase		Mental Retardation, Fra12a Type	FALSE	FALSE	1	-1
hsa-mir-181c-5p	MAP3K10	mirna-gene	Predicted	Starbase			FALSE	FALSE	1	-1
hsa-mir-181c-5p	ATXN1	mirna-gene	Predicted	Starbase		Spinocerebellar Ataxias	FALSE	FALSE	1	-1
hsa-mir-181c-5p	PALM2	mirna-gene	Predicted	Starbase			FALSE	FALSE	1	-1
hsa-mir-181c-5p	ANKRD52	mirna-gene	Predicted	Starbase			FALSE	FALSE	1	-1
hsa-mir-181c-5p	CRIM1	mirna-gene	Predicted	Starbase			FALSE	FALSE	1	-1
hsa-mir-181c-5p	RNF182	mirna-gene	Predicted	Starbase		Breast Neoplasms, Colorectal Neoplasms	FALSE	FALSE	-1	-1
hsa-mir-181c-5p	BCL2	mirna-gene	Experimental	mirtarbase		Colonic Neoplasms, Reperfusion Injury, Alzheimer Disease, Diabetes Mellitus, Experimental, Erectile Dysfunction, Lymphoma, Follicular, Breast Neoplasms, Carcinoma, Lymphoma, Large B-Cell, Diffuse, Prostatic Neoplasms, Colorectal Neoplasms, Lymphoma, Non-Hodgkin, Adenocarcinoma, Esophageal Neoplasms, Azoospermia, Autistic Disorder, Sarcoma, Synovial, Multiple Myeloma, Adenoma, Diabetes Mellitus, T…	FALSE	FALSE	1	-1
hsa-mir-181c-5p	PRTG	mirna-gene	Predicted	Starbase			FALSE	FALSE	1	-1
hsa-mir-181c-5p	TMEM64	mirna-gene	Predicted	Starbase			FALSE	FALSE	1	-1
hsa-mir-181c-5p	PBX1	mirna-gene	Predicted	Starbase		Burkitt Lymphoma, Substance-Related Disorders	FALSE	FALSE	1	-1
hsa-mir-181c-5p	NR6A1	mirna-gene	Predicted	Starbase			FALSE	FALSE	1	-1
hsa-mir-181c-5p	PPARA	mirna-gene	Predicted	Starbase		Hypertension, Reperfusion Injury, Diabetes Mellitus, Type 2, Obesity, Dyslipidemias, Fatty Liver, Hyperlipidemias, Insulin Resistance, Dermatitis, Atopic, Carcinoma, Neoplasms, Inflammation, Kidney Failure, Chronic, Liver Neoplasms, Encephalomyelitis, Autoimmune, Experimental, Hepatomegaly, Hypoglycemia, Kidney Diseases, Kidney Tubular Necrosis, Acute, Muscular Diseases, Abdominal obesity metabol…	FALSE	FALSE	1	-1
hsa-mir-181c-5p	ABI1	mirna-gene	Predicted	Starbase			FALSE	FALSE	1	-1
hsa-mir-181c-5p	TNS1	mirna-gene	Predicted	Starbase			FALSE	FALSE	1	-1
hsa-mir-181c-5p	ADARB1	mirna-gene	Predicted	Starbase		Polycystic Ovary Syndrome	FALSE	FALSE	1	-1
hsa-mir-181c-5p	DOCK4	mirna-gene	Predicted	Starbase		Autistic Disorder	FALSE	FALSE	1	-1
hsa-mir-181c-5p	ADCY1	mirna-gene	Predicted	Starbase		Hyperkinesis, Small Cell Lung Carcinoma, Substance Withdrawal Syndrome	FALSE	FALSE	1	-1
hsa-mir-181c-5p	TMEM132B	mirna-gene	Predicted	Starbase		Melanoma	FALSE	FALSE	-1	-1
hsa-mir-181c-5p	ONECUT2	mirna-gene	Predicted	Starbase			FALSE	FALSE	1	-1
hsa-mir-181c-5p	BMPR2	mirna-gene	Experimental	mirtarbase		Pulmonary arterial hypertension, Hypertension, Pulmonary, Pulmonary Veno-Occlusive Disease, Hyperandrogenism	FALSE	FALSE	1	-1
hsa-mir-181c-5p	KLHL29	mirna-gene	Predicted	Starbase			FALSE	FALSE	1	-1
hsa-mir-181c-5p	DUSP10	mirna-gene	Predicted	Starbase		Inflammation	FALSE	FALSE	1	-1
hsa-mir-181c-5p	TGFBR1	mirna-gene	Predicted	Starbase		LOEYS-DIETZ SYNDROME, TYPE 1A, Loeys-Dietz Syndrome, Type 2A, Keratoacanthoma familial, Colorectal Neoplasms, Loeys-Dietz Syndrome, Skin Neoplasms, Aneurysm, Dissecting, Abortion, Spontaneous, Auditory Neuropathy, Autosomal Dominant, 1, Uremia	FALSE	FALSE	1	-1
hsa-mir-181c-5p	SCD	mirna-gene	Predicted	Starbase		Carcinoma, Carcinoma, Hepatocellular, Graves Ophthalmopathy, Lipidoses, Liver Neoplasms, Mammary Neoplasms, Animal, Mammary Neoplasms, Experimental	FALSE	FALSE	1	-1
hsa-mir-181c-5p	GRB10	mirna-gene	Predicted	Starbase			FALSE	FALSE	1	-1
hsa-mir-181c-5p	SLC19A2	mirna-gene	Predicted	Starbase		Thiamine responsive megaloblastic anemia syndrome	FALSE	FALSE	1	-1
hsa-mir-181c-5p	MAT2A	mirna-gene	Predicted	Starbase			FALSE	FALSE	1	-1
hsa-mir-181c-5p	FAM160A1	mirna-gene	Predicted	Starbase			FALSE	FALSE	-1	-1
hsa-mir-181c-5p	SLC25A37	mirna-gene	Predicted	Starbase		Anemia	FALSE	FALSE	1	-1
hsa-mir-181c-5p	CBX7	mirna-gene	Predicted	Starbase			FALSE	FALSE	1	-1
hsa-mir-181c-5p	FAM160A1	mirna-gene	Predicted	Starbase			FALSE	FALSE	1	-1
hsa-mir-181c-5p	HOXD1	mirna-gene	Predicted	Starbase		Colorectal Neoplasms, Hyperalgesia, Ovarian Neoplasms, Pain	FALSE	FALSE	1	-1
hsa-mir-182-5p	AATK	mirna-gene	Predicted	Starbase			FALSE	FALSE	1	-1
hsa-mir-182-5p	SLC23A2	mirna-gene	Predicted	Starbase		Cholestasis	FALSE	FALSE	1	-1
hsa-mir-182-5p	DOCK4	mirna-gene	Predicted	Starbase		Autistic Disorder	FALSE	FALSE	1	-1
hsa-mir-182-5p	NT5DC3	mirna-gene	Predicted	Starbase			FALSE	FALSE	1	-1
hsa-mir-182-5p	FAT3	mirna-gene	Predicted	Starbase			FALSE	FALSE	1	-1
hsa-mir-182-5p	IGF1R	mirna-gene	Predicted	Starbase		Insulin-Like Growth Factor I, Resistance To, Parkinson Disease, Breast Neoplasms, Carcinoma, Hepatocellular, Alzheimer Disease, Fetal Growth Retardation, Congenital diaphragmatic hernia, Endometrial Neoplasms, Growth Disorders, Lewy Body Disease, Lung Diseases, Peripheral Nervous System Diseases, Respiratory Insufficiency, Skin Neoplasms	FALSE	FALSE	1	-1
hsa-mir-182-5p	INSR	mirna-gene	Predicted	Starbase		Donohue Syndrome, Diabetes Mellitus, Insulin-Resistant, with Acanthosis Nigricans, Hyperinsulinemic Hypoglycemia, Familial, 5, Diabetes Mellitus, Type 2, Hyperinsulinism, Insulin Resistance, Hyperglycemia, Diabetes Mellitus, Experimental, Diabetic Neuropathies, Glucose Intolerance, Pineal hyperplasia AND diabetes mellitus syndrome, Parkinson Disease, Congenital diaphragmatic hernia, Hyperalgesia,…	FALSE	FALSE	1	-1
hsa-mir-182-5p	SAMD4A	mirna-gene	Predicted	Starbase		Substance-Related Disorders	FALSE	FALSE	1	-1
hsa-mir-182-5p	GPC3	mirna-gene	Predicted	Starbase		Simpson-Golabi-Behmel syndrome, Carcinoma, Hepatocellular, Wilms Tumor, Mesothelioma	FALSE	FALSE	1	-1
hsa-mir-182-5p	CLOCK	mirna-gene	Experimental	mirtarbase			FALSE	FALSE	1	-1
hsa-mir-182-5p	CDC42BPA	mirna-gene	Predicted	Starbase			FALSE	FALSE	1	-1
hsa-mir-182-5p	BCL2	mirna-gene	Experimental	mirtarbase		Colonic Neoplasms, Reperfusion Injury, Alzheimer Disease, Diabetes Mellitus, Experimental, Erectile Dysfunction, Lymphoma, Follicular, Breast Neoplasms, Carcinoma, Lymphoma, Large B-Cell, Diffuse, Prostatic Neoplasms, Colorectal Neoplasms, Lymphoma, Non-Hodgkin, Adenocarcinoma, Esophageal Neoplasms, Azoospermia, Autistic Disorder, Sarcoma, Synovial, Multiple Myeloma, Adenoma, Diabetes Mellitus, T…	FALSE	FALSE	1	-1
hsa-mir-182-5p	ATXN1	mirna-gene	Predicted	Starbase		Spinocerebellar Ataxias	FALSE	FALSE	1	-1
hsa-mir-182-5p	LRCH2	mirna-gene	Predicted	Starbase			FALSE	FALSE	1	-1
hsa-mir-182-5p	FOXO1	mirna-gene	Experimental	mirtarbase		Rhabdomyosarcoma, Alveolar, Leukemia, Myeloid, Acute, Keratoconus	FALSE	FALSE	1	-1
hsa-mir-182-5p	OSBPL2	mirna-gene	Predicted	Starbase			FALSE	FALSE	1	-1
hsa-mir-182-5p	TNS1	mirna-gene	Predicted	Starbase			FALSE	FALSE	1	-1
hsa-mir-182-5p	FOXQ1	mirna-gene	Predicted	Starbase			FALSE	FALSE	-1	-1
hsa-mir-182-5p	RARG	mirna-gene	Experimental	mirtarbase		Cleft Palate, Musculoskeletal Abnormalities	FALSE	FALSE	1	-1
hsa-mir-182-5p	INSIG1	mirna-gene	Predicted	Starbase		Carcinoma, Mammary Neoplasms, Animal, Mammary Neoplasms, Experimental	FALSE	FALSE	1	-1
hsa-mir-182-5p	PPP1R9A	mirna-gene	Predicted	Starbase			FALSE	FALSE	1	-1
hsa-mir-182-5p	KLF7	mirna-gene	Predicted	Starbase			FALSE	FALSE	1	-1
hsa-mir-182-5p	KIAA1549	mirna-gene	Predicted	Starbase			FALSE	FALSE	1	-1
hsa-mir-183-5p	PDE4D	mirna-gene	Predicted	Starbase		Stroke, Asthma, Amphetamine-Related Disorders, Prostatic Neoplasms	FALSE	FALSE	1	-1
hsa-mir-183-5p	DUSP10	mirna-gene	Predicted	Starbase		Inflammation	FALSE	FALSE	1	-1
hsa-mir-183-5p	MRC2	mirna-gene	Predicted	Starbase		Carcinoma, Mammary Neoplasms, Animal, Mammary Neoplasms, Experimental	FALSE	FALSE	1	-1
hsa-mir-183-5p	ARID4B	mirna-gene	Predicted	Starbase		Carcinoma, Adenoid Cystic	FALSE	FALSE	1	-1
hsa-mir-183-5p	TET1	mirna-gene	Predicted	Starbase			FALSE	FALSE	1	-1
hsa-mir-183-5p	ATP13A3	mirna-gene	Predicted	Starbase			FALSE	FALSE	1	-1
hsa-mir-183-5p	PTDSS1	mirna-gene	Predicted	Starbase			FALSE	FALSE	1	-1
hsa-mir-183-5p	RBMS1	mirna-gene	Predicted	Starbase			FALSE	FALSE	1	-1
hsa-mir-183-5p	FOXO1	mirna-gene	Experimental	mirtarbase		Rhabdomyosarcoma, Alveolar, Leukemia, Myeloid, Acute, Keratoconus	FALSE	FALSE	1	-1
hsa-mir-183-5p	STC1	mirna-gene	Predicted	Starbase			FALSE	FALSE	1	-1
hsa-mir-183-5p	PRKCA	mirna-gene	Predicted	Starbase		Cardiomegaly, Diabetes Mellitus, Experimental, Intestinal Neoplasms	FALSE	FALSE	1	-1
hsa-mir-18a	CSRNP3	mirna-gene	Experimental	mirtarbase.adstudy	Carcinoma, Hepatocellular, Carcinoma, Hepatocellular, Colonic Neoplasms, Hematologic Neoplasms, Leukemia, B-Cell, Leukemia, B-Cell, Leukemia, B-Cell, Leukemia, B-Cell, Lung Neoplasms, Lung Neoplasms, Lung Neoplasms, Lymphoma, Lymphoma, Lymphoma, B-Cell, Neoplasms, Ovarian Neoplasms, Melanoma, Breast Neoplasms, Ovarian Neoplasms, Lymphoma, B-Cell, Colorectal Neoplasms, Stomach Neoplasms, Head and …	Abortion, Spontaneous, Substance-Related Disorders	FALSE	FALSE	1	1
hsa-mir-18a	hsa-let-7f	mirna-mirna	Predicted	Pmmr	Carcinoma, Hepatocellular, Carcinoma, Hepatocellular, Colonic Neoplasms, Hematologic Neoplasms, Leukemia, B-Cell, Leukemia, B-Cell, Leukemia, B-Cell, Leukemia, B-Cell, Lung Neoplasms, Lung Neoplasms, Lung Neoplasms, Lymphoma, Lymphoma, Lymphoma, B-Cell, Neoplasms, Ovarian Neoplasms, Melanoma, Breast Neoplasms, Ovarian Neoplasms, Lymphoma, B-Cell, Colorectal Neoplasms, Stomach Neoplasms, Head and …		FALSE	FALSE	-1	1
hsa-mir-18a	hsa-mir-196b	mirna-mirna	Predicted	Pmmr	Carcinoma, Hepatocellular, Carcinoma, Hepatocellular, Colonic Neoplasms, Hematologic Neoplasms, Leukemia, B-Cell, Leukemia, B-Cell, Leukemia, B-Cell, Leukemia, B-Cell, Lung Neoplasms, Lung Neoplasms, Lung Neoplasms, Lymphoma, Lymphoma, Lymphoma, B-Cell, Neoplasms, Ovarian Neoplasms, Melanoma, Breast Neoplasms, Ovarian Neoplasms, Lymphoma, B-Cell, Colorectal Neoplasms, Stomach Neoplasms, Head and …	Neoplasms, Endometriosis, Hepatitis C, Leukemia, Neutropenia, Leukemia, Myeloid, Acute, Leukemia, Myeloid, Acute, Leukemia, Lymphocytic, Chronic, B-Cell, Adenoviridae Infections, Prostatic Neoplasms, Crohn Disease, Urinary Bladder Neoplasms, Hepatitis C, Leukemia, Myeloid, Acute, Glioblastoma, Precursor Cell Lymphoblastic Leukemia-Lymphoma, Pancreatic Neoplasms, Stomach Neoplasms, Leukemia, Gliob…	FALSE	FALSE	-1	1
hsa-mir-18b-5p	TLL1	mirna-gene	Predicted	Starbase		Atrial Septal Defect 6	FALSE	FALSE	1	1
hsa-mir-18b-5p	DAAM2	mirna-gene	Predicted	Starbase			FALSE	FALSE	1	1
hsa-mir-18b-5p	PDE4D	mirna-gene	Predicted	Starbase		Stroke, Asthma, Amphetamine-Related Disorders, Prostatic Neoplasms	FALSE	FALSE	1	1
hsa-mir-18b-5p	ATXN1	mirna-gene	Predicted	Starbase		Spinocerebellar Ataxias	FALSE	FALSE	1	1
hsa-mir-18b-5p	CRIM1	mirna-gene	Predicted	Starbase			FALSE	FALSE	1	1
hsa-mir-18b-5p	NFAT5	mirna-gene	Predicted	Starbase			FALSE	FALSE	1	1
hsa-mir-18b-5p	HMBOX1	mirna-gene	Predicted	Starbase			FALSE	FALSE	1	1
hsa-mir-18b-5p	DOCK4	mirna-gene	Predicted	Starbase		Autistic Disorder	FALSE	FALSE	1	1
hsa-mir-18b-5p	XYLT1	mirna-gene	Predicted	Starbase		Pseudoxanthoma Elasticum, Substance-Related Disorders	FALSE	FALSE	1	1
hsa-mir-18b-5p	ZNF704	mirna-gene	Predicted	Starbase			FALSE	FALSE	1	1
hsa-mir-190b	OSBPL6	mirna-gene	Predicted	Starbase	Neuroblastoma	Peripheral Nervous System Diseases	FALSE	FALSE	1	-1
hsa-mir-190b	DAB2IP	mirna-gene	Predicted	Starbase	Neuroblastoma	Prostatic Neoplasms, Aortic Aneurysm, Abdominal, Lung Neoplasms, Myocardial Infarction, Peripheral Vascular Diseases, Pulmonary Embolism	FALSE	FALSE	1	-1
hsa-mir-192	BCL2	mirna-gene	Experimental	mirtarbase.adstudy	Heart Failure, Lung Neoplasms, Lung Neoplasms, Colonic Neoplasms, Adrenocortical Carcinoma, Nephrosclerosis, Adenocarcinoma, Fibrosis, Reperfusion Injury, Carcinoma, Multiple Myeloma, Lupus Erythematosus, Systemic, Retinoblastoma, Carcinoma, Hepatocellular, Pancreatic Neoplasms, Muscular Dystrophies, Drug-Induced Liver Injury, Barrett Esophagus, Carcinoma, Hepatocellular, Stomach Neoplasms, Diabe…	Colonic Neoplasms, Reperfusion Injury, Alzheimer Disease, Diabetes Mellitus, Experimental, Erectile Dysfunction, Lymphoma, Follicular, Breast Neoplasms, Carcinoma, Lymphoma, Large B-Cell, Diffuse, Prostatic Neoplasms, Colorectal Neoplasms, Lymphoma, Non-Hodgkin, Adenocarcinoma, Esophageal Neoplasms, Azoospermia, Autistic Disorder, Sarcoma, Synovial, Multiple Myeloma, Adenoma, Diabetes Mellitus, T…	FALSE	FALSE	1	1
hsa-mir-192	RANBP3	mirna-gene	Experimental	mirtarbase.adstudy	Heart Failure, Lung Neoplasms, Lung Neoplasms, Colonic Neoplasms, Adrenocortical Carcinoma, Nephrosclerosis, Adenocarcinoma, Fibrosis, Reperfusion Injury, Carcinoma, Multiple Myeloma, Lupus Erythematosus, Systemic, Retinoblastoma, Carcinoma, Hepatocellular, Pancreatic Neoplasms, Muscular Dystrophies, Drug-Induced Liver Injury, Barrett Esophagus, Carcinoma, Hepatocellular, Stomach Neoplasms, Diabe…		FALSE	FALSE	1	1
hsa-mir-192	PDE2A	mirna-gene	Experimental	mirtarbase.adstudy	Heart Failure, Lung Neoplasms, Lung Neoplasms, Colonic Neoplasms, Adrenocortical Carcinoma, Nephrosclerosis, Adenocarcinoma, Fibrosis, Reperfusion Injury, Carcinoma, Multiple Myeloma, Lupus Erythematosus, Systemic, Retinoblastoma, Carcinoma, Hepatocellular, Pancreatic Neoplasms, Muscular Dystrophies, Drug-Induced Liver Injury, Barrett Esophagus, Carcinoma, Hepatocellular, Stomach Neoplasms, Diabe…	Breast Neoplasms	FALSE	FALSE	1	1
hsa-mir-193b-3p	TGFBR3	mirna-gene	Predicted	Starbase			FALSE	FALSE	1	-1
hsa-mir-193b-3p	ZNF365	mirna-gene	Predicted	Starbase		Breast Neoplasms, Dermatitis, Atopic, NEPHROLITHIASIS, URIC ACID, SUSCEPTIBILITY TO	FALSE	FALSE	1	-1
hsa-mir-196a-5p	CPEB3	mirna-gene	Predicted	Starbase			FALSE	FALSE	1	-1
hsa-mir-196a-5p	PBX1	mirna-gene	Predicted	Starbase		Burkitt Lymphoma, Substance-Related Disorders	FALSE	FALSE	1	-1
hsa-mir-196a-5p	PUM2	mirna-gene	Predicted	Starbase			FALSE	FALSE	1	-1
hsa-mir-196a-5p	HMOX1	mirna-gene	Experimental	mirtarbase		Hypertension, Ischemia, Myocardial Ischemia, Reperfusion Injury, Colitis, Diabetes Mellitus, Experimental, Liver Cirrhosis, Experimental, Status Epilepticus, Alzheimer Disease, Coronary Artery Disease, Diabetes Mellitus, Type 2, Parkinson Disease, Inflammation, Asthma, Stomach Neoplasms, Pulmonary Disease, Chronic Obstructive, Breast Neoplasms, Pneumonia, Obesity, Fibrosis, Hyperplasia, Wounds an…	FALSE	FALSE	1	-1
hsa-mir-196a-5p	LCOR	mirna-gene	Predicted	Starbase			FALSE	FALSE	1	-1
hsa-mir-196a-5p	ANXA1	mirna-gene	Experimental	mirtarbase		Neoplasm Metastasis, Mammary Neoplasms, Experimental, Carcinoma, Squamous Cell, Prostatic Neoplasms, Carcinoma, Adenocarcinoma of lung, Esophageal Squamous Cell Carcinoma, Lymphatic Metastasis, Craniofacial Abnormalities, Kidney Diseases, Mammary Neoplasms, Animal, Mouth Neoplasms, Neoplasm Invasiveness, Stomach Diseases	FALSE	FALSE	-1	-1
hsa-mir-196a-5p	PPP1R15B	mirna-gene	Predicted	Starbase			FALSE	FALSE	1	-1
hsa-mir-19a-3p	CDC42BPA	mirna-gene	Predicted	Starbase			FALSE	FALSE	1	1
hsa-mir-19a-3p	SLC48A1	mirna-gene	Predicted	Starbase			FALSE	FALSE	1	1
hsa-mir-19a-3p	FAT3	mirna-gene	Predicted	Starbase			FALSE	FALSE	1	1
hsa-mir-19a-3p	PRR5L	mirna-gene	Predicted	Starbase			FALSE	FALSE	1	1
hsa-mir-19a-3p	IGF2R	mirna-gene	Predicted	Starbase		Carcinoma, Hepatocellular, Alzheimer Disease, Congenital diaphragmatic hernia, Lewy Body Disease, Lung Diseases, Parkinson Disease	FALSE	FALSE	1	1
hsa-mir-19a-3p	HIPK3	mirna-gene	Predicted	Starbase			FALSE	FALSE	1	1
hsa-mir-19a-3p	MICAL3	mirna-gene	Predicted	Starbase			FALSE	FALSE	1	1
hsa-mir-19a-3p	SOCS5	mirna-gene	Predicted	Starbase			FALSE	FALSE	1	1
hsa-mir-19a-3p	BMPR2	mirna-gene	Experimental	mirtarbase		Pulmonary arterial hypertension, Hypertension, Pulmonary, Pulmonary Veno-Occlusive Disease, Hyperandrogenism	FALSE	FALSE	1	1
hsa-mir-19a-3p	ATXN1	mirna-gene	Experimental	mirtarbase		Spinocerebellar Ataxias	FALSE	FALSE	1	1
hsa-mir-19a-3p	DOCK4	mirna-gene	Predicted	Starbase		Autistic Disorder	FALSE	FALSE	1	1
hsa-mir-19a-3p	SEC22B	mirna-gene	Predicted	Starbase			FALSE	FALSE	1	1
hsa-mir-19a-3p	MXD1	mirna-gene	Predicted	Starbase		Dermatitis, Allergic Contact	FALSE	FALSE	1	1
hsa-mir-19a-3p	XYLT1	mirna-gene	Predicted	Starbase		Pseudoxanthoma Elasticum, Substance-Related Disorders	FALSE	FALSE	1	1
hsa-mir-19a-3p	WNT10A	mirna-gene	Predicted	Starbase		Odontoonychodermal dysplasia, Lymphoma, Mantle-Cell, Schopf-Schulz-Passarge Syndrome, Tooth Agenesis, Selective, 4	FALSE	FALSE	1	1
hsa-mir-19a-3p	SLC6A8	mirna-gene	Predicted	Starbase		Creatine deficiency, X-linked, Mental Retardation, X-Linked, Autistic Disorder, Developmental Disabilities	FALSE	FALSE	1	1
hsa-mir-19a-3p	ELOVL5	mirna-gene	Predicted	Starbase			FALSE	FALSE	1	1
hsa-mir-19a-3p	LMLN	mirna-gene	Predicted	Starbase			FALSE	FALSE	1	1
hsa-mir-19a-3p	MKL2	mirna-gene	Predicted	Starbase		Child Development Disorders, Pervasive	FALSE	FALSE	1	1
hsa-mir-19a-3p	ADAM12	mirna-gene	Predicted	Starbase			FALSE	FALSE	1	1
hsa-mir-19a-3p	KLF13	mirna-gene	Predicted	Starbase		Endometriosis	FALSE	FALSE	1	1
hsa-mir-19a-3p	CCDC88A	mirna-gene	Predicted	Starbase			FALSE	FALSE	-1	1
hsa-mir-19a-3p	OTUD7B	mirna-gene	Predicted	Starbase			FALSE	FALSE	1	1
hsa-mir-19a-3p	MSMO1	mirna-gene	Experimental	mirtarbase			FALSE	FALSE	1	1
hsa-mir-19a-3p	HOXD1	mirna-gene	Predicted	Starbase		Colorectal Neoplasms, Hyperalgesia, Ovarian Neoplasms, Pain	FALSE	FALSE	1	1
hsa-mir-19a-3p	CLOCK	mirna-gene	Predicted	Starbase			FALSE	FALSE	1	1
hsa-mir-19a-3p	ANTXR1	mirna-gene	Predicted	Starbase		Hemangioma, capillary infantile	FALSE	FALSE	-1	1
hsa-mir-19a-3p	SPOCK1	mirna-gene	Predicted	Starbase		Prostatic Neoplasms	FALSE	FALSE	1	1
hsa-mir-19a-3p	TNFRSF1B	mirna-gene	Predicted	Starbase		Diabetes Mellitus, Type 2, Obesity, Pneumonia, Autistic Disorder, Brain Ischemia, Fractures, Bone, Hypersensitivity, Hypoalbuminemia, Liver Cirrhosis, Non-alcoholic Fatty Liver Disease	FALSE	FALSE	1	1
hsa-mir-19a-3p	SEMA6B	mirna-gene	Predicted	Starbase			FALSE	FALSE	1	1
hsa-mir-19a-3p	PPP1R15B	mirna-gene	Predicted	Starbase			FALSE	FALSE	1	1
hsa-mir-19a-3p	ARID4B	mirna-gene	Predicted	Starbase		Carcinoma, Adenoid Cystic	FALSE	FALSE	1	1
hsa-mir-19a-3p	EVI5L	mirna-gene	Predicted	Starbase			FALSE	FALSE	1	1
hsa-mir-19a-3p	FAM160A1	mirna-gene	Predicted	Starbase			FALSE	FALSE	1	1
hsa-mir-19a-3p	GRB10	mirna-gene	Predicted	Starbase			FALSE	FALSE	1	1
hsa-mir-19a-3p	TMEM64	mirna-gene	Predicted	Starbase			FALSE	FALSE	1	1
hsa-mir-19a-3p	CBX7	mirna-gene	Predicted	Starbase			FALSE	FALSE	1	1
hsa-mir-19a-3p	BCL3	mirna-gene	Predicted	Starbase			FALSE	FALSE	1	1
hsa-mir-19a-3p	RBMS1	mirna-gene	Predicted	Starbase			FALSE	FALSE	1	1
hsa-mir-19a-3p	FAM160A1	mirna-gene	Predicted	Starbase			FALSE	FALSE	-1	1
hsa-mir-19a-3p	LRCH2	mirna-gene	Predicted	Starbase			FALSE	FALSE	1	1
hsa-mir-19a-3p	SOCS3	mirna-gene	Predicted	Starbase		Carcinoma, Hepatocellular, Atherosclerosis, Dermatitis, Atopic, 4, Endometrial Neoplasms, Liver Diseases, Myocardial Ischemia	FALSE	FALSE	1	1
hsa-mir-19a-3p	REEP1	mirna-gene	Predicted	Starbase		Spastic Paraplegia 31, Autosomal Dominant	FALSE	FALSE	1	1
hsa-mir-19a-3p	INSIG1	mirna-gene	Predicted	Starbase		Carcinoma, Mammary Neoplasms, Animal, Mammary Neoplasms, Experimental	FALSE	FALSE	1	1
hsa-mir-19a-3p	SRGAP3	mirna-gene	Predicted	Starbase		Intellectual Disability, Chromosome 3, monosomy 3p25	FALSE	FALSE	1	1
hsa-mir-19a-3p	NR3C2	mirna-gene	Predicted	Starbase		Hypertension, Early-Onset, Autosomal Dominant, with Severe Exacerbation in Pregnancy, PSEUDOHYPOALDOSTERONISM, TYPE I, AUTOSOMAL DOMINANT, Pseudohypoaldosteronism, Cardiomyopathy, Dilated, Heart Failure, Myocardial Infarction, Endometriosis, Ventricular Dysfunction, Left	FALSE	FALSE	1	1
hsa-mir-19a-3p	TMEM63B	mirna-gene	Predicted	Starbase			FALSE	FALSE	1	1
hsa-mir-19a-3p	TNFAIP3	mirna-gene	Predicted	Starbase		Lupus Erythematosus, Systemic, Arthritis, Rheumatoid, Psoriasis	FALSE	FALSE	1	1
hsa-mir-19b-3p	EVI5L	mirna-gene	Predicted	Starbase			FALSE	FALSE	1	1
hsa-mir-19b-3p	BMPR2	mirna-gene	Experimental	mirtarbase		Pulmonary arterial hypertension, Hypertension, Pulmonary, Pulmonary Veno-Occlusive Disease, Hyperandrogenism	FALSE	FALSE	1	1
hsa-mir-19b-3p	FAM160A1	mirna-gene	Predicted	Starbase			FALSE	FALSE	-1	1
hsa-mir-19b-3p	CCDC88A	mirna-gene	Predicted	Starbase			FALSE	FALSE	-1	1
hsa-mir-19b-3p	SOCS3	mirna-gene	Predicted	Starbase		Carcinoma, Hepatocellular, Atherosclerosis, Dermatitis, Atopic, 4, Endometrial Neoplasms, Liver Diseases, Myocardial Ischemia	FALSE	FALSE	1	1
hsa-mir-19b-3p	IGF2R	mirna-gene	Predicted	Starbase		Carcinoma, Hepatocellular, Alzheimer Disease, Congenital diaphragmatic hernia, Lewy Body Disease, Lung Diseases, Parkinson Disease	FALSE	FALSE	1	1
hsa-mir-19b-3p	MICAL3	mirna-gene	Predicted	Starbase			FALSE	FALSE	1	1
hsa-mir-19b-3p	ARID4B	mirna-gene	Experimental	mirtarbase		Carcinoma, Adenoid Cystic	FALSE	FALSE	1	1
hsa-mir-19b-3p	BCL3	mirna-gene	Predicted	Starbase			FALSE	FALSE	1	1
hsa-mir-19b-3p	ELOVL5	mirna-gene	Predicted	Starbase			FALSE	FALSE	1	1
hsa-mir-19b-3p	TMEM64	mirna-gene	Predicted	Starbase			FALSE	FALSE	1	1
hsa-mir-19b-3p	ANTXR1	mirna-gene	Predicted	Starbase		Hemangioma, capillary infantile	FALSE	FALSE	-1	1
hsa-mir-19b-3p	ATXN1	mirna-gene	Experimental	mirtarbase		Spinocerebellar Ataxias	FALSE	FALSE	1	1
hsa-mir-19b-3p	CLOCK	mirna-gene	Predicted	Starbase			FALSE	FALSE	1	1
hsa-mir-19b-3p	HOXD1	mirna-gene	Predicted	Starbase		Colorectal Neoplasms, Hyperalgesia, Ovarian Neoplasms, Pain	FALSE	FALSE	1	1
hsa-mir-19b-3p	XYLT1	mirna-gene	Predicted	Starbase		Pseudoxanthoma Elasticum, Substance-Related Disorders	FALSE	FALSE	1	1
hsa-mir-19b-3p	MKL2	mirna-gene	Predicted	Starbase		Child Development Disorders, Pervasive	FALSE	FALSE	1	1
hsa-mir-19b-3p	CDC42BPA	mirna-gene	Predicted	Starbase			FALSE	FALSE	1	1
hsa-mir-19b-3p	SEMA6B	mirna-gene	Predicted	Starbase			FALSE	FALSE	1	1
hsa-mir-19b-3p	TNFRSF1B	mirna-gene	Predicted	Starbase		Diabetes Mellitus, Type 2, Obesity, Pneumonia, Autistic Disorder, Brain Ischemia, Fractures, Bone, Hypersensitivity, Hypoalbuminemia, Liver Cirrhosis, Non-alcoholic Fatty Liver Disease	FALSE	FALSE	1	1
hsa-mir-19b-3p	OTUD7B	mirna-gene	Predicted	Starbase			FALSE	FALSE	1	1
hsa-mir-19b-3p	PRR5L	mirna-gene	Predicted	Starbase			FALSE	FALSE	1	1
hsa-mir-19b-3p	SLC48A1	mirna-gene	Predicted	Starbase			FALSE	FALSE	1	1
hsa-mir-19b-3p	MXD1	mirna-gene	Predicted	Starbase		Dermatitis, Allergic Contact	FALSE	FALSE	1	1
hsa-mir-19b-3p	DOCK4	mirna-gene	Predicted	Starbase		Autistic Disorder	FALSE	FALSE	1	1
hsa-mir-19b-3p	SOCS5	mirna-gene	Predicted	Starbase			FALSE	FALSE	1	1
hsa-mir-19b-3p	PPP1R15B	mirna-gene	Predicted	Starbase			FALSE	FALSE	1	1
hsa-mir-19b-3p	SPOCK1	mirna-gene	Predicted	Starbase		Prostatic Neoplasms	FALSE	FALSE	1	1
hsa-mir-19b-3p	KLF13	mirna-gene	Predicted	Starbase		Endometriosis	FALSE	FALSE	1	1
hsa-mir-19b-3p	WNT10A	mirna-gene	Predicted	Starbase		Odontoonychodermal dysplasia, Lymphoma, Mantle-Cell, Schopf-Schulz-Passarge Syndrome, Tooth Agenesis, Selective, 4	FALSE	FALSE	1	1
hsa-mir-19b-3p	CBX7	mirna-gene	Predicted	Starbase			FALSE	FALSE	1	1
hsa-mir-19b-3p	SRGAP3	mirna-gene	Predicted	Starbase		Intellectual Disability, Chromosome 3, monosomy 3p25	FALSE	FALSE	1	1
hsa-mir-19b-3p	LMLN	mirna-gene	Predicted	Starbase			FALSE	FALSE	1	1
hsa-mir-19b-3p	TMEM63B	mirna-gene	Predicted	Starbase			FALSE	FALSE	1	1
hsa-mir-19b-3p	FAM160A1	mirna-gene	Predicted	Starbase			FALSE	FALSE	1	1
hsa-mir-19b-3p	HIPK3	mirna-gene	Experimental	mirtarbase			FALSE	FALSE	1	1
hsa-mir-19b-3p	ADAM12	mirna-gene	Predicted	Starbase			FALSE	FALSE	1	1
hsa-mir-19b-3p	TNFAIP3	mirna-gene	Predicted	Starbase		Lupus Erythematosus, Systemic, Arthritis, Rheumatoid, Psoriasis	FALSE	FALSE	1	1
hsa-mir-19b-3p	RBMS1	mirna-gene	Predicted	Starbase			FALSE	FALSE	1	1
hsa-mir-19b-3p	GRB10	mirna-gene	Predicted	Starbase			FALSE	FALSE	1	1
hsa-mir-19b-3p	NR3C2	mirna-gene	Predicted	Starbase		Hypertension, Early-Onset, Autosomal Dominant, with Severe Exacerbation in Pregnancy, PSEUDOHYPOALDOSTERONISM, TYPE I, AUTOSOMAL DOMINANT, Pseudohypoaldosteronism, Cardiomyopathy, Dilated, Heart Failure, Myocardial Infarction, Endometriosis, Ventricular Dysfunction, Left	FALSE	FALSE	1	1
hsa-mir-19b-3p	FAT3	mirna-gene	Predicted	Starbase			FALSE	FALSE	1	1
hsa-mir-19b-3p	SLC6A8	mirna-gene	Predicted	Starbase		Creatine deficiency, X-linked, Mental Retardation, X-Linked, Autistic Disorder, Developmental Disabilities	FALSE	FALSE	1	1
hsa-mir-19b-3p	LRCH2	mirna-gene	Predicted	Starbase			FALSE	FALSE	1	1
hsa-mir-19b-3p	REEP1	mirna-gene	Predicted	Starbase		Spastic Paraplegia 31, Autosomal Dominant	FALSE	FALSE	1	1
hsa-mir-19b-3p	INSIG1	mirna-gene	Predicted	Starbase		Carcinoma, Mammary Neoplasms, Animal, Mammary Neoplasms, Experimental	FALSE	FALSE	1	1
hsa-mir-19b-3p	SEC22B	mirna-gene	Predicted	Starbase			FALSE	FALSE	1	1
hsa-mir-200a-3p	ZEB1	mirna-gene	Experimental	mirtarbase		Corneal Dystrophy, Fuchs Endothelial, 6, Corneal Dystrophy, Posterior Polymorphous, 3, Breast Neoplasms, Cell Transformation, Neoplastic, Disease Progression, Myocardial Ischemia, Neoplasm Invasiveness	FALSE	FALSE	1	1
hsa-mir-200a-3p	DOCK4	mirna-gene	Predicted	Starbase		Autistic Disorder	FALSE	FALSE	1	1
hsa-mir-200a-3p	FKBP5	mirna-gene	Predicted	Starbase		Depressive Disorder, Major, Arthritis, Rheumatoid, Endometriosis	FALSE	FALSE	-1	1
hsa-mir-200a-3p	TFRC	mirna-gene	Predicted	Starbase		Abortion, Spontaneous, Anemia, Iron-Deficiency, beta-Thalassemia, Lung Neoplasms, Leukemia, Lymphocytic, Chronic, B-Cell, Obesity, Breast Neoplasms, Glioma, Lymphoma, Non-Hodgkin, Polycystic Ovary Syndrome, Arenaviridae Infections, Cell Transformation, Neoplastic, Colorectal Neoplasms, Helicobacter Infections, Inflammation, Iron Metabolism Disorders, Myocardial Ischemia, Myocardial Reperfusion In…	FALSE	FALSE	1	1
hsa-mir-200a-3p	DIP2B	mirna-gene	Predicted	Starbase		Mental Retardation, Fra12a Type	FALSE	FALSE	1	1
hsa-mir-200a-3p	STXBP1	mirna-gene	Predicted	Starbase		Epileptic Encephalopathy, Early Infantile, 4, Epilepsies, Myoclonic	FALSE	FALSE	-1	1
hsa-mir-200a-3p	TET1	mirna-gene	Predicted	Starbase			FALSE	FALSE	1	1
hsa-mir-200a-3p	MMP24	mirna-gene	Predicted	Starbase			FALSE	FALSE	1	1
hsa-mir-200a-3p	SLC23A2	mirna-gene	Predicted	Starbase		Cholestasis	FALSE	FALSE	1	1
hsa-mir-200a-3p	PPP1R15B	mirna-gene	Predicted	Starbase			FALSE	FALSE	1	1
hsa-mir-200a-3p	APBB2	mirna-gene	Predicted	Starbase		Alzheimer Disease, Weight Gain	FALSE	FALSE	1	1
hsa-mir-200a-3p	ATXN1	mirna-gene	Predicted	Starbase		Spinocerebellar Ataxias	FALSE	FALSE	1	1
hsa-mir-200a-3p	KLF11	mirna-gene	Experimental	mirtarbase		Maturity-Onset Diabetes of the Young, Type 7	FALSE	FALSE	-1	1
hsa-mir-200a-3p	WASF3	mirna-gene	Experimental	mirtarbase			FALSE	FALSE	-1	1
hsa-mir-200a-3p	TOP1	mirna-gene	Predicted	Starbase		Neoplasms, Drug Toxicity	FALSE	FALSE	-1	1
hsa-mir-21	HIPK3	mirna-gene	Experimental	mirrecords.adstudy	Brain Neoplasms, Brain Neoplasms, Breast Neoplasms, Breast Neoplasms, Breast Neoplasms, Breast Neoplasms, Breast Neoplasms, Cholangiocarcinoma, Colonic Neoplasms, Dermatitis, Atopic, Focal Epithelial Hyperplasia, Glioblastoma, Glioblastoma, Glioblastoma, Glioblastoma, Glioblastoma, Glioblastoma, Heart Diseases, Heart Failure, Lung Neoplasms, Lung Neoplasms, Lymphoma, Large B-Cell, Diffuse, Muscul…		FALSE	FALSE	1	1
hsa-mir-21	TNFAIP3	mirna-gene	Experimental	mirtarbase.adstudy	Brain Neoplasms, Brain Neoplasms, Breast Neoplasms, Breast Neoplasms, Breast Neoplasms, Breast Neoplasms, Breast Neoplasms, Cholangiocarcinoma, Colonic Neoplasms, Dermatitis, Atopic, Focal Epithelial Hyperplasia, Glioblastoma, Glioblastoma, Glioblastoma, Glioblastoma, Glioblastoma, Glioblastoma, Heart Diseases, Heart Failure, Lung Neoplasms, Lung Neoplasms, Lymphoma, Large B-Cell, Diffuse, Muscul…	Lupus Erythematosus, Systemic, Arthritis, Rheumatoid, Psoriasis	FALSE	FALSE	1	1
hsa-mir-21	ERBB2	mirna-gene	Experimental	mirtarbase.adstudy	Brain Neoplasms, Brain Neoplasms, Breast Neoplasms, Breast Neoplasms, Breast Neoplasms, Breast Neoplasms, Breast Neoplasms, Cholangiocarcinoma, Colonic Neoplasms, Dermatitis, Atopic, Focal Epithelial Hyperplasia, Glioblastoma, Glioblastoma, Glioblastoma, Glioblastoma, Glioblastoma, Glioblastoma, Heart Diseases, Heart Failure, Lung Neoplasms, Lung Neoplasms, Lymphoma, Large B-Cell, Diffuse, Muscul…	Breast Neoplasms, Mammary Neoplasms, Experimental, Neoplasm Metastasis, Adenocarcinoma, Ovarian Neoplasms, Prostatic Neoplasms, Lung Neoplasms, Stomach Neoplasms, Cholangiocarcinoma, Glioma, Medulloblastoma, Colonic Neoplasms, Esophageal Neoplasms, Carcinoma, Renal Cell, Lymphatic Metastasis, Papilloma, Disease Progression, Gastrointestinal Neoplasms, Mammary Neoplasms, Animal, Neoplasm Recurrenc…	FALSE	FALSE	1	1
hsa-mir-21	PPARA	mirna-gene	Experimental	mirRecord	Brain Neoplasms, Brain Neoplasms, Breast Neoplasms, Breast Neoplasms, Breast Neoplasms, Breast Neoplasms, Breast Neoplasms, Cholangiocarcinoma, Colonic Neoplasms, Dermatitis, Atopic, Focal Epithelial Hyperplasia, Glioblastoma, Glioblastoma, Glioblastoma, Glioblastoma, Glioblastoma, Glioblastoma, Heart Diseases, Heart Failure, Lung Neoplasms, Lung Neoplasms, Lymphoma, Large B-Cell, Diffuse, Muscul…	Hypertension, Reperfusion Injury, Diabetes Mellitus, Type 2, Obesity, Dyslipidemias, Fatty Liver, Hyperlipidemias, Insulin Resistance, Dermatitis, Atopic, Carcinoma, Neoplasms, Inflammation, Kidney Failure, Chronic, Liver Neoplasms, Encephalomyelitis, Autoimmune, Experimental, Hepatomegaly, Hypoglycemia, Kidney Diseases, Kidney Tubular Necrosis, Acute, Muscular Diseases, Abdominal obesity metabol…	FALSE	FALSE	1	1
hsa-mir-21	BCL2	mirna-gene	Experimental	mirtarbase.adstudy	Brain Neoplasms, Brain Neoplasms, Breast Neoplasms, Breast Neoplasms, Breast Neoplasms, Breast Neoplasms, Breast Neoplasms, Cholangiocarcinoma, Colonic Neoplasms, Dermatitis, Atopic, Focal Epithelial Hyperplasia, Glioblastoma, Glioblastoma, Glioblastoma, Glioblastoma, Glioblastoma, Glioblastoma, Heart Diseases, Heart Failure, Lung Neoplasms, Lung Neoplasms, Lymphoma, Large B-Cell, Diffuse, Muscul…	Colonic Neoplasms, Reperfusion Injury, Alzheimer Disease, Diabetes Mellitus, Experimental, Erectile Dysfunction, Lymphoma, Follicular, Breast Neoplasms, Carcinoma, Lymphoma, Large B-Cell, Diffuse, Prostatic Neoplasms, Colorectal Neoplasms, Lymphoma, Non-Hodgkin, Adenocarcinoma, Esophageal Neoplasms, Azoospermia, Autistic Disorder, Sarcoma, Synovial, Multiple Myeloma, Adenoma, Diabetes Mellitus, T…	FALSE	FALSE	1	1
hsa-mir-21	BMPR2	mirna-gene	Experimental	mirtarbase.adstudy	Brain Neoplasms, Brain Neoplasms, Breast Neoplasms, Breast Neoplasms, Breast Neoplasms, Breast Neoplasms, Breast Neoplasms, Cholangiocarcinoma, Colonic Neoplasms, Dermatitis, Atopic, Focal Epithelial Hyperplasia, Glioblastoma, Glioblastoma, Glioblastoma, Glioblastoma, Glioblastoma, Glioblastoma, Heart Diseases, Heart Failure, Lung Neoplasms, Lung Neoplasms, Lymphoma, Large B-Cell, Diffuse, Muscul…	Pulmonary arterial hypertension, Hypertension, Pulmonary, Pulmonary Veno-Occlusive Disease, Hyperandrogenism	FALSE	FALSE	1	1
hsa-mir-21	TGFBR3	mirna-gene	Experimental	mirtarbase.adstudy	Brain Neoplasms, Brain Neoplasms, Breast Neoplasms, Breast Neoplasms, Breast Neoplasms, Breast Neoplasms, Breast Neoplasms, Cholangiocarcinoma, Colonic Neoplasms, Dermatitis, Atopic, Focal Epithelial Hyperplasia, Glioblastoma, Glioblastoma, Glioblastoma, Glioblastoma, Glioblastoma, Glioblastoma, Heart Diseases, Heart Failure, Lung Neoplasms, Lung Neoplasms, Lymphoma, Large B-Cell, Diffuse, Muscul…		FALSE	FALSE	1	1
hsa-mir-21	SOCS5	mirna-gene	Experimental	mirrecords.adstudy	Brain Neoplasms, Brain Neoplasms, Breast Neoplasms, Breast Neoplasms, Breast Neoplasms, Breast Neoplasms, Breast Neoplasms, Cholangiocarcinoma, Colonic Neoplasms, Dermatitis, Atopic, Focal Epithelial Hyperplasia, Glioblastoma, Glioblastoma, Glioblastoma, Glioblastoma, Glioblastoma, Glioblastoma, Heart Diseases, Heart Failure, Lung Neoplasms, Lung Neoplasms, Lymphoma, Large B-Cell, Diffuse, Muscul…		FALSE	FALSE	1	1
hsa-mir-212-3p	DOCK4	mirna-gene	Predicted	Starbase		Autistic Disorder	FALSE	FALSE	1	-1
hsa-mir-212-3p	BBX	mirna-gene	Predicted	Starbase			FALSE	FALSE	1	-1
hsa-mir-212-3p	FOXN3	mirna-gene	Predicted	Starbase			FALSE	FALSE	1	-1
hsa-mir-212-3p	ATXN1	mirna-gene	Predicted	Starbase		Spinocerebellar Ataxias	FALSE	FALSE	1	-1
hsa-mir-212-3p	PUM2	mirna-gene	Predicted	Starbase			FALSE	FALSE	1	-1
hsa-mir-214	hsa-mir-21	mirna-mirna	Predicted	Pmmr	Cardiomyopathy, Hypertrophic, Cardiomyopathy, Hypertrophic, Lung Neoplasms, Muscular Disorders, Atrophic, Pancreatic Neoplasms, Prostatic Neoplasms, Stomach Neoplasms, Retinal Neovascularization, Retinal Neovascularization, Ovarian Neoplasms, Breast Neoplasms, Melanoma, Carcinoma, Stomach Neoplasms, SARS Virus, Hepatoblastoma, Adrenal Cortex Neoplasms, Neoplasms, Ovarian Neoplasms, Melanoma, Repe…	Brain Neoplasms, Brain Neoplasms, Breast Neoplasms, Breast Neoplasms, Breast Neoplasms, Breast Neoplasms, Breast Neoplasms, Cholangiocarcinoma, Colonic Neoplasms, Dermatitis, Atopic, Focal Epithelial Hyperplasia, Glioblastoma, Glioblastoma, Glioblastoma, Glioblastoma, Glioblastoma, Glioblastoma, Heart Diseases, Heart Failure, Lung Neoplasms, Lung Neoplasms, Lymphoma, Large B-Cell, Diffuse, Muscul…	FALSE	FALSE	1	-1
hsa-mir-214	hsa-mir-216b	mirna-mirna	Predicted	Pmmr	Cardiomyopathy, Hypertrophic, Cardiomyopathy, Hypertrophic, Lung Neoplasms, Muscular Disorders, Atrophic, Pancreatic Neoplasms, Prostatic Neoplasms, Stomach Neoplasms, Retinal Neovascularization, Retinal Neovascularization, Ovarian Neoplasms, Breast Neoplasms, Melanoma, Carcinoma, Stomach Neoplasms, SARS Virus, Hepatoblastoma, Adrenal Cortex Neoplasms, Neoplasms, Ovarian Neoplasms, Melanoma, Repe…	Lung Neoplasms, Fatty Liver, Nasopharyngeal Neoplasms, Pancreatic Neoplasms, Colorectal Neoplasms	FALSE	FALSE	1	-1
hsa-mir-214	hsa-mir-196b	mirna-mirna	Predicted	Pmmr	Cardiomyopathy, Hypertrophic, Cardiomyopathy, Hypertrophic, Lung Neoplasms, Muscular Disorders, Atrophic, Pancreatic Neoplasms, Prostatic Neoplasms, Stomach Neoplasms, Retinal Neovascularization, Retinal Neovascularization, Ovarian Neoplasms, Breast Neoplasms, Melanoma, Carcinoma, Stomach Neoplasms, SARS Virus, Hepatoblastoma, Adrenal Cortex Neoplasms, Neoplasms, Ovarian Neoplasms, Melanoma, Repe…	Neoplasms, Endometriosis, Hepatitis C, Leukemia, Neutropenia, Leukemia, Myeloid, Acute, Leukemia, Myeloid, Acute, Leukemia, Lymphocytic, Chronic, B-Cell, Adenoviridae Infections, Prostatic Neoplasms, Crohn Disease, Urinary Bladder Neoplasms, Hepatitis C, Leukemia, Myeloid, Acute, Glioblastoma, Precursor Cell Lymphoblastic Leukemia-Lymphoma, Pancreatic Neoplasms, Stomach Neoplasms, Leukemia, Gliob…	FALSE	FALSE	-1	-1
hsa-mir-214	hsa-mir-212	mirna-mirna	Predicted	Pmmr	Cardiomyopathy, Hypertrophic, Cardiomyopathy, Hypertrophic, Lung Neoplasms, Muscular Disorders, Atrophic, Pancreatic Neoplasms, Prostatic Neoplasms, Stomach Neoplasms, Retinal Neovascularization, Retinal Neovascularization, Ovarian Neoplasms, Breast Neoplasms, Melanoma, Carcinoma, Stomach Neoplasms, SARS Virus, Hepatoblastoma, Adrenal Cortex Neoplasms, Neoplasms, Ovarian Neoplasms, Melanoma, Repe…	Heart Failure, Lung Neoplasms, Schizophrenia, Liver Diseases, Alcoholic, Autistic Disorder, Stomach Neoplasms, Carcinoma, Non-Small-Cell Lung, Cocaine-Related Disorders, Cocaine-Related Disorders, Urinary Bladder Neoplasms, Neoplasms, Squamous Cell, Pancreatic Neoplasms, Stomach Neoplasms, Carcinoma, Hepatocellular, Carcinoma, Non-Small-Cell Lung, Leukemia, Myelogenous, Chronic, BCR-ABL Positive,…	FALSE	FALSE	-1	-1
hsa-mir-214	hsa-let-7f	mirna-mirna	Predicted	Pmmr	Cardiomyopathy, Hypertrophic, Cardiomyopathy, Hypertrophic, Lung Neoplasms, Muscular Disorders, Atrophic, Pancreatic Neoplasms, Prostatic Neoplasms, Stomach Neoplasms, Retinal Neovascularization, Retinal Neovascularization, Ovarian Neoplasms, Breast Neoplasms, Melanoma, Carcinoma, Stomach Neoplasms, SARS Virus, Hepatoblastoma, Adrenal Cortex Neoplasms, Neoplasms, Ovarian Neoplasms, Melanoma, Repe…		FALSE	FALSE	-1	-1
hsa-mir-301a	hsa-let-7f	mirna-mirna	Predicted	Pmmr	Salivary Gland Neoplasms, Adrenocortical Carcinoma, Lung Neoplasms, Lung Neoplasms, Breast Neoplasms, Parkinson Disease, Periodontitis, Carcinoma, Hepatocellular, Demyelinating Diseases, Prostatic Neoplasms, Stomach Neoplasms, Colorectal Neoplasms, Diabetes Mellitus		FALSE	FALSE	-1	1
hsa-mir-301a	hsa-mir-129-5p	mirna-mirna	Predicted	Pmmr	Salivary Gland Neoplasms, Adrenocortical Carcinoma, Lung Neoplasms, Lung Neoplasms, Breast Neoplasms, Parkinson Disease, Periodontitis, Carcinoma, Hepatocellular, Demyelinating Diseases, Prostatic Neoplasms, Stomach Neoplasms, Colorectal Neoplasms, Diabetes Mellitus		FALSE	FALSE	-1	1
hsa-mir-301a	hsa-mir-143	mirna-mirna	Predicted	Pmmr	Salivary Gland Neoplasms, Adrenocortical Carcinoma, Lung Neoplasms, Lung Neoplasms, Breast Neoplasms, Parkinson Disease, Periodontitis, Carcinoma, Hepatocellular, Demyelinating Diseases, Prostatic Neoplasms, Stomach Neoplasms, Colorectal Neoplasms, Diabetes Mellitus	Breast Neoplasms, Colonic Neoplasms, Colonic Neoplasms, Colonic Neoplasms, Colonic Neoplasms, Colonic Neoplasms, Colorectal Neoplasms, Hepatitis, Chronic, Hepatitis, Chronic, Lung Neoplasms, Muscular Disorders, Atrophic, Obesity, ACTH-Secreting Pituitary Adenoma, Barrett Esophagus, Urinary Bladder Neoplasms, Uterine Cervical Neoplasms, Colorectal Neoplasms, Colorectal Neoplasms, Endometriosis, Ob…	FALSE	FALSE	1	1
hsa-mir-301a	hsa-mir-129-3p	mirna-mirna	Predicted	Pmmr	Salivary Gland Neoplasms, Adrenocortical Carcinoma, Lung Neoplasms, Lung Neoplasms, Breast Neoplasms, Parkinson Disease, Periodontitis, Carcinoma, Hepatocellular, Demyelinating Diseases, Prostatic Neoplasms, Stomach Neoplasms, Colorectal Neoplasms, Diabetes Mellitus		FALSE	FALSE	-1	1
hsa-mir-301a	hsa-mir-196b	mirna-mirna	Predicted	Pmmr	Salivary Gland Neoplasms, Adrenocortical Carcinoma, Lung Neoplasms, Lung Neoplasms, Breast Neoplasms, Parkinson Disease, Periodontitis, Carcinoma, Hepatocellular, Demyelinating Diseases, Prostatic Neoplasms, Stomach Neoplasms, Colorectal Neoplasms, Diabetes Mellitus	Neoplasms, Endometriosis, Hepatitis C, Leukemia, Neutropenia, Leukemia, Myeloid, Acute, Leukemia, Myeloid, Acute, Leukemia, Lymphocytic, Chronic, B-Cell, Adenoviridae Infections, Prostatic Neoplasms, Crohn Disease, Urinary Bladder Neoplasms, Hepatitis C, Leukemia, Myeloid, Acute, Glioblastoma, Precursor Cell Lymphoblastic Leukemia-Lymphoma, Pancreatic Neoplasms, Stomach Neoplasms, Leukemia, Gliob…	FALSE	FALSE	-1	1
hsa-mir-30a-5p	CLOCK	mirna-gene	Predicted	Starbase			FALSE	FALSE	1	1
hsa-mir-30a-5p	GRB10	mirna-gene	Predicted	Starbase			FALSE	FALSE	1	1
hsa-mir-30a-5p	STXBP1	mirna-gene	Predicted	Starbase		Epileptic Encephalopathy, Early Infantile, 4, Epilepsies, Myoclonic	FALSE	FALSE	-1	1
hsa-mir-30a-5p	NFAT5	mirna-gene	Predicted	Starbase			FALSE	FALSE	1	1
hsa-mir-30a-5p	ATP2B1	mirna-gene	Predicted	Starbase		Hypertension, Cataract, Coronary Artery Disease	FALSE	FALSE	-1	1
hsa-mir-30a-5p	TMEM170B	mirna-gene	Predicted	Starbase			FALSE	FALSE	1	1
hsa-mir-30a-5p	MYO5A	mirna-gene	Predicted	Starbase		Griscelli syndrome type 1, Peripheral Nervous System Diseases	FALSE	FALSE	1	1
hsa-mir-30a-5p	LRCH2	mirna-gene	Predicted	Starbase			FALSE	FALSE	1	1
hsa-mir-30a-5p	ARID4B	mirna-gene	Predicted	Starbase		Carcinoma, Adenoid Cystic	FALSE	FALSE	1	1
hsa-mir-30a-5p	SEMA3A	mirna-gene	Predicted	Starbase			FALSE	FALSE	1	1
hsa-mir-30a-5p	KIAA1549	mirna-gene	Predicted	Starbase			FALSE	FALSE	1	1
hsa-mir-30a-5p	MAFG	mirna-gene	Predicted	Starbase			FALSE	FALSE	1	1
hsa-mir-30a-5p	KLF11	mirna-gene	Predicted	Starbase		Maturity-Onset Diabetes of the Young, Type 7	FALSE	FALSE	-1	1
hsa-mir-30a-5p	IGF2R	mirna-gene	Predicted	Starbase		Carcinoma, Hepatocellular, Alzheimer Disease, Congenital diaphragmatic hernia, Lewy Body Disease, Lung Diseases, Parkinson Disease	FALSE	FALSE	1	1
hsa-mir-30a-5p	MKL2	mirna-gene	Predicted	Starbase		Child Development Disorders, Pervasive	FALSE	FALSE	1	1
hsa-mir-30a-5p	NAV1	mirna-gene	Predicted	Starbase			FALSE	FALSE	1	1
hsa-mir-30a-5p	CCDC120	mirna-gene	Predicted	Starbase			FALSE	FALSE	1	1
hsa-mir-30a-5p	LIFR	mirna-gene	Predicted	Starbase		Stuve-Wiedemann syndrome, Polycystic Ovary Syndrome, Prostatic Neoplasms	FALSE	FALSE	1	1
hsa-mir-30a-5p	BDP1	mirna-gene	Predicted	Starbase			FALSE	FALSE	1	1
hsa-mir-30a-5p	MAT2A	mirna-gene	Predicted	Starbase			FALSE	FALSE	1	1
hsa-mir-30a-5p	ELOVL5	mirna-gene	Predicted	Starbase			FALSE	FALSE	1	1
hsa-mir-30a-5p	PALM2	mirna-gene	Predicted	Starbase			FALSE	FALSE	1	1
hsa-mir-30a-5p	SH3PXD2A	mirna-gene	Predicted	Starbase			FALSE	FALSE	1	1
hsa-mir-30a-5p	SAMD4A	mirna-gene	Predicted	Starbase		Substance-Related Disorders	FALSE	FALSE	1	1
hsa-mir-30a-5p	MAGI3	mirna-gene	Predicted	Starbase			FALSE	FALSE	1	1
hsa-mir-30a-5p	PDE4D	mirna-gene	Predicted	Starbase		Stroke, Asthma, Amphetamine-Related Disorders, Prostatic Neoplasms	FALSE	FALSE	1	1
hsa-mir-30a-5p	PIP4K2A	mirna-gene	Predicted	Starbase			FALSE	FALSE	1	1
hsa-mir-30a-5p	CPEB3	mirna-gene	Predicted	Starbase			FALSE	FALSE	1	1
hsa-mir-30a-5p	RARG	mirna-gene	Predicted	Starbase		Cleft Palate, Musculoskeletal Abnormalities	FALSE	FALSE	1	1
hsa-mir-30a-5p	PLXNA2	mirna-gene	Predicted	Starbase		Schizophrenia	FALSE	FALSE	1	1
hsa-mir-30a-5p	SOCS3	mirna-gene	Predicted	Starbase		Carcinoma, Hepatocellular, Atherosclerosis, Dermatitis, Atopic, 4, Endometrial Neoplasms, Liver Diseases, Myocardial Ischemia	FALSE	FALSE	1	1
hsa-mir-30a-5p	KREMEN1	mirna-gene	Predicted	Starbase			FALSE	FALSE	1	1
hsa-mir-30a-5p	DIP2B	mirna-gene	Predicted	Starbase		Mental Retardation, Fra12a Type	FALSE	FALSE	1	1
hsa-mir-30e-5p	PALM2	mirna-gene	Predicted	Starbase			FALSE	FALSE	1	1
hsa-mir-30e-5p	MKL2	mirna-gene	Predicted	Starbase		Child Development Disorders, Pervasive	FALSE	FALSE	1	1
hsa-mir-30e-5p	RARG	mirna-gene	Predicted	Starbase		Cleft Palate, Musculoskeletal Abnormalities	FALSE	FALSE	1	1
hsa-mir-30e-5p	LRCH2	mirna-gene	Predicted	Starbase			FALSE	FALSE	1	1
hsa-mir-30e-5p	DIP2B	mirna-gene	Predicted	Starbase		Mental Retardation, Fra12a Type	FALSE	FALSE	1	1
hsa-mir-30e-5p	MYO5A	mirna-gene	Predicted	Starbase		Griscelli syndrome type 1, Peripheral Nervous System Diseases	FALSE	FALSE	1	1
hsa-mir-30e-5p	PLXNA2	mirna-gene	Predicted	Starbase		Schizophrenia	FALSE	FALSE	1	1
hsa-mir-30e-5p	MAT2A	mirna-gene	Predicted	Starbase			FALSE	FALSE	1	1
hsa-mir-30e-5p	LIFR	mirna-gene	Predicted	Starbase		Stuve-Wiedemann syndrome, Polycystic Ovary Syndrome, Prostatic Neoplasms	FALSE	FALSE	1	1
hsa-mir-30e-5p	CCDC120	mirna-gene	Predicted	Starbase			FALSE	FALSE	1	1
hsa-mir-30e-5p	CLOCK	mirna-gene	Predicted	Starbase			FALSE	FALSE	1	1
hsa-mir-30e-5p	CPEB3	mirna-gene	Predicted	Starbase			FALSE	FALSE	1	1
hsa-mir-30e-5p	SEMA3A	mirna-gene	Predicted	Starbase			FALSE	FALSE	1	1
hsa-mir-30e-5p	PIP4K2A	mirna-gene	Predicted	Starbase			FALSE	FALSE	1	1
hsa-mir-30e-5p	NFAT5	mirna-gene	Predicted	Starbase			FALSE	FALSE	1	1
hsa-mir-30e-5p	ARID4B	mirna-gene	Predicted	Starbase		Carcinoma, Adenoid Cystic	FALSE	FALSE	1	1
hsa-mir-30e-5p	STXBP1	mirna-gene	Predicted	Starbase		Epileptic Encephalopathy, Early Infantile, 4, Epilepsies, Myoclonic	FALSE	FALSE	-1	1
hsa-mir-30e-5p	KLF11	mirna-gene	Predicted	Starbase		Maturity-Onset Diabetes of the Young, Type 7	FALSE	FALSE	-1	1
hsa-mir-30e-5p	SOCS3	mirna-gene	Predicted	Starbase		Carcinoma, Hepatocellular, Atherosclerosis, Dermatitis, Atopic, 4, Endometrial Neoplasms, Liver Diseases, Myocardial Ischemia	FALSE	FALSE	1	1
hsa-mir-30e-5p	SH3PXD2A	mirna-gene	Predicted	Starbase			FALSE	FALSE	1	1
hsa-mir-30e-5p	PDE4D	mirna-gene	Predicted	Starbase		Stroke, Asthma, Amphetamine-Related Disorders, Prostatic Neoplasms	FALSE	FALSE	1	1
hsa-mir-30e-5p	GRB10	mirna-gene	Predicted	Starbase			FALSE	FALSE	1	1
hsa-mir-30e-5p	ELOVL5	mirna-gene	Predicted	Starbase			FALSE	FALSE	1	1
hsa-mir-30e-5p	ATP2B1	mirna-gene	Predicted	Starbase		Hypertension, Cataract, Coronary Artery Disease	FALSE	FALSE	-1	1
hsa-mir-30e-5p	KIAA1549	mirna-gene	Predicted	Starbase			FALSE	FALSE	1	1

## Sheet: Table S2.6-IPP-exp+predic
regulator	target	category	evidence	source	regulator.association.disease	target.association.disease	is_regulator_in_disease	is_target_in_disease	target.reg	regulator.reg
ATF3	ATF3	tf-gene	Experimental	Transfac	Hypospadias, Prostatic Neoplasms, Carcinoma, Non-Small-Cell Lung, Diabetes Mellitus, Type 2, Influenza, Human, Liver Neoplasms, Diabetes Mellitus, Experimental, Infarction, Middle Cerebral Artery, Nervous System Diseases, Ovarian Neoplasms, Peripheral Nervous System Diseases	Hypospadias, Prostatic Neoplasms, Carcinoma, Non-Small-Cell Lung, Diabetes Mellitus, Type 2, Influenza, Human, Liver Neoplasms, Diabetes Mellitus, Experimental, Infarction, Middle Cerebral Artery, Nervous System Diseases, Ovarian Neoplasms, Peripheral Nervous System Diseases	FALSE	FALSE	1	1
BCL3	hsa-mir-146a	tf-mirna	Predicted	Chipbase		Breast Neoplasms, Leukemia, Lymphocytic, Chronic, B-Cell, Lung Neoplasms, Muscular Disorders, Atrophic, Pancreatic Neoplasms, Prostatic Neoplasms, Psoriasis, Psoriasis, Thyroid Neoplasms, Thyroid Neoplasms, Thyroid Neoplasms, Thyroid Neoplasms, Thyroid Neoplasms, Lymphoma, B-Cell, Burkitt Lymphoma, Eczema, Alzheimer Disease, Autistic Disorder, Breast Neoplasms, Breast Neoplasms, Breast Neoplasms,…	FALSE	FALSE	1	1
BCL3	hsa-mir-21	tf-mirna	Predicted	Chipbase		Brain Neoplasms, Brain Neoplasms, Breast Neoplasms, Breast Neoplasms, Breast Neoplasms, Breast Neoplasms, Breast Neoplasms, Cholangiocarcinoma, Colonic Neoplasms, Dermatitis, Atopic, Focal Epithelial Hyperplasia, Glioblastoma, Glioblastoma, Glioblastoma, Glioblastoma, Glioblastoma, Glioblastoma, Heart Diseases, Heart Failure, Lung Neoplasms, Lung Neoplasms, Lymphoma, Large B-Cell, Diffuse, Muscul…	FALSE	FALSE	1	1
BDP1	hsa-mir-18a	tf-mirna	Predicted	Chipbase		Carcinoma, Hepatocellular, Carcinoma, Hepatocellular, Colonic Neoplasms, Hematologic Neoplasms, Leukemia, B-Cell, Leukemia, B-Cell, Leukemia, B-Cell, Leukemia, B-Cell, Lung Neoplasms, Lung Neoplasms, Lung Neoplasms, Lymphoma, Lymphoma, Lymphoma, B-Cell, Neoplasms, Ovarian Neoplasms, Melanoma, Breast Neoplasms, Ovarian Neoplasms, Lymphoma, B-Cell, Colorectal Neoplasms, Stomach Neoplasms, Head and …	FALSE	FALSE	1	1
BDP1	hsa-mir-301a	tf-mirna	Predicted	Chipbase		Salivary Gland Neoplasms, Adrenocortical Carcinoma, Lung Neoplasms, Lung Neoplasms, Breast Neoplasms, Parkinson Disease, Periodontitis, Carcinoma, Hepatocellular, Demyelinating Diseases, Prostatic Neoplasms, Stomach Neoplasms, Colorectal Neoplasms, Diabetes Mellitus	FALSE	FALSE	1	1
BDP1	hsa-mir-21	tf-mirna	Predicted	Chipbase		Brain Neoplasms, Brain Neoplasms, Breast Neoplasms, Breast Neoplasms, Breast Neoplasms, Breast Neoplasms, Breast Neoplasms, Cholangiocarcinoma, Colonic Neoplasms, Dermatitis, Atopic, Focal Epithelial Hyperplasia, Glioblastoma, Glioblastoma, Glioblastoma, Glioblastoma, Glioblastoma, Glioblastoma, Heart Diseases, Heart Failure, Lung Neoplasms, Lung Neoplasms, Lymphoma, Large B-Cell, Diffuse, Muscul…	FALSE	FALSE	1	1
FOS	TGFB1	tf-gene	Predicted	TRED	Hypertension, Reperfusion Injury, Carcinoma, Hepatocellular, Breast Neoplasms, Endometriosis, Seizures, Amphetamine-Related Disorders, Amyotrophic lateral sclerosis 1, Anxiety Disorders, Brain Injuries, Cocaine-Related Disorders, Epilepsy, Fibrous Dysplasia of Bone, Hemorrhage, Hyperkinesis, Infarction, Middle Cerebral Artery, Lung Neoplasms, Nervous System Diseases, Neurotoxicity Syndromes, Stat…	Camurati-Engelmann Syndrome, Asthma, Pulmonary Disease, Chronic Obstructive, Hypertension, Pulmonary Fibrosis, Lung Diseases, Diabetes Mellitus, Experimental, Diabetic Neuropathies, Hernia, Diaphragmatic, Liver Cirrhosis, Experimental, Fibrosis, Osteoporosis, Carcinoma, Kidney Diseases, Carcinoma, Hepatocellular, Prostatic Neoplasms, Diabetic Nephropathies, Carcinoma, Squamous Cell, Inflammation,…	FALSE	FALSE	1	1
FOS	FASN	tf-gene	Predicted	TRED	Hypertension, Reperfusion Injury, Carcinoma, Hepatocellular, Breast Neoplasms, Endometriosis, Seizures, Amphetamine-Related Disorders, Amyotrophic lateral sclerosis 1, Anxiety Disorders, Brain Injuries, Cocaine-Related Disorders, Epilepsy, Fibrous Dysplasia of Bone, Hemorrhage, Hyperkinesis, Infarction, Middle Cerebral Artery, Lung Neoplasms, Nervous System Diseases, Neurotoxicity Syndromes, Stat…	Breast Neoplasms, Obesity, Neoplasms, Carcinoma, Hepatocellular, Melanoma, Liposarcoma, Ovarian Neoplasms, Kidney Failure, Chronic	FALSE	FALSE	1	1
[truncated: 574 more rows]

## Sheet: Table S2.7-TBBPA-exp+predic
regulator	target	category	evidence	source	regulator.association.disease	target.association.disease	is_regulator_in_disease	is_target_in_disease	target.reg	regulator.reg
[truncated: 249 more rows]

## Sheet: TableS2.8-TBBPA-DBPE-exp+predic
regulator	target	category	evidence	source	regulator.association.disease	target.association.disease	is_regulator_in_disease	is_target_in_disease	target.reg	regulator.reg
[truncated: 282 more rows]

[truncated: 1 more sheets: Table S2.9-TCEP-exp+predic]
