# Supplementary material for: Phenotypically Anchored mRNA and miRNA Expression Profiling in Zebrafish Reveals Flame Retardant Chemical Toxicity Networks
Source: Front Cell Dev Biol. 2021 Apr 9;9:663032. doi: 10.3389/fcell.2021.663032 (PMC8063052; doi:10.3389/fcell.2021.663032)
Supplement: Supplementary file 3 [file Table_3.XLSX]

## Sheet: Table S3.1-mRNA-GO-TBBPA
Enrichment analysis report
Enrichment by GO Processes					TBBPA-Con_log2(1.5)all_FRC_RNA
#	Processes	Total	pValue	Min FDR	p-value	FDR	In Data	Network Objects from Active Data
1	SRP-dependent cotranslational protein targeting to membrane	105	1.45807e-47	7.84295e-44	1.45807e-47	7.84295e-44	40	RPS28, RPL21, RPS11, RPL41, RPS19, RPLP2, RPL30, RPS30, RPL35, RPS13, RPS2, RPS3, RPS12, RPL22, RPS24, RP40, RPL11, RPL26, RPL17, RPL29, RPL32, RPL38, RPS14, RPL34, RPL18, RPS29, RPS26, RPS23, RPL36, RPS17, RPS27A, RPS9, RPS15a, RPS7, RPL24, RPS25, RPL36A, RPL35a, RPS21, RPL23
2	cotranslational protein targeting to membrane	109	8.95059e-47	2.40726e-43	8.95059e-47	2.40726e-43	40	RPS28, RPL21, RPS11, RPL41, RPS19, RPLP2, RPL30, RPS30, RPL35, RPS13, RPS2, RPS3, RPS12, RPL22, RPS24, RP40, RPL11, RPL26, RPL17, RPL29, RPL32, RPL38, RPS14, RPL34, RPL18, RPS29, RPS26, RPS23, RPL36, RPS17, RPS27A, RPS9, RPS15a, RPS7, RPL24, RPS25, RPL36A, RPL35a, RPS21, RPL23
3	protein targeting to ER	131	1.38498e-44	2.48327e-41	1.38498e-44	2.48327e-41	41	RPS28, RPL21, RPS11, RPL41, RPS19, RPLP2, RPL30, RPS30, RPL35, RPS13, RPS2, RPS3, RPS12, RPL22, RPS24, RP40, RPL11, RPL26, RPL17, RPL29, SPC12, RPL32, RPL38, RPS14, RPL34, RPL18, RPS29, RPS26, RPS23, RPL36, RPS17, RPS27A, RPS9, RPS15a, RPS7, RPL24, RPS25, RPL36A, RPL35a, RPS21, RPL23
4	viral transcription	124	4.03884e-44	5.43124e-41	4.03884e-44	5.43124e-41	40	RPS28, RPL21, RPS11, RPL41, RPS19, RPLP2, RPL30, RPS30, RPL35, RPS13, RPS2, RPS3, RPS12, RPL22, RPS24, RP40, RPL11, RPL26, RPL17, RPL29, RPL32, RPL38, RPS14, RPL34, RPL18, RPS29, RPS26, RPS23, RPL36, RPS17, RPS27A, RPS9, RPS15a, RPS7, RPL24, RPS25, RPL36A, RPL35a, RPS21, RPL23
5	establishment of protein localization to endoplasmic reticulum	136	8.11184e-44	7.27226e-41	8.11184e-44	7.27226e-41	41	RPS28, RPL21, RPS11, RPL41, RPS19, RPLP2, RPL30, RPS30, RPL35, RPS13, RPS2, RPS3, RPS12, RPL22, RPS24, RP40, RPL11, RPL26, RPL17, RPL29, SPC12, RPL32, RPL38, RPS14, RPL34, RPL18, RPS29, RPS26, RPS23, RPL36, RPS17, RPS27A, RPS9, RPS15a, RPS7, RPL24, RPS25, RPL36A, RPL35a, RPS21, RPL23
6	nuclear-transcribed mRNA catabolic process, nonsense-mediated decay	136	8.11184e-44	7.27226e-41	8.11184e-44	7.27226e-41	41	RPS28, RPL21, RPS11, RPL41, RPS19, KGUA, RPLP2, RPL30, RPS30, RPL35, RPS13, RPS2, RPS3, RPS12, RPL22, RPS24, RP40, RPL11, RPL26, RPL17, RPL29, RPL32, RPL38, RPS14, RPL34, RPL18, RPS29, RPS26, RPS23, RPL36, RPS17, RPS27A, RPS9, RPS15a, RPS7, RPL24, RPS25, RPL36A, RPL35a, RPS21, RPL23
7	viral gene expression	143	8.45442e-43	6.49662e-40	8.45442e-43	6.49662e-40	41	RPS28, RPL21, RPS11, RPL41, RPS19, RPLP2, RPL30, RPS30, RPL35, RPS13, RPS2, RPS3, RPS12, RPL22, RPS24, RP40, RPL11, RPL26, RPL17, RPL29, SPC12, RPL32, RPL38, RPS14, RPL34, RPL18, RPS29, RPS26, RPS23, RPL36, RPS17, RPS27A, RPS9, RPS15a, RPS7, RPL24, RPS25, RPL36A, RPL35a, RPS21, RPL23
8	protein localization to endoplasmic reticulum	168	1.71546e-42	1.15343e-39	1.71546e-42	1.15343e-39	43	RPS28, RPL21, RPS11, RPL41, RPS19, RPLP2, RPL30, RPS30, RPL35, RPS13, RPS2, RPS3, RPS12, RPL22, RPS24, RP40, RPL11, RPL26, RPL17, RPL29, SPC12, RPL32, RPL38, RPS14, RPL34, RPL18, RPS29, RPS26, RPS23, RPL36, RPS17, RPS27A, RPS9, RPS15a, Ionotropic glutamate receptor, RPS7, RPL24, RPS25, RPL36A, RPL35a, Kainate receptor, RPS21, RPL23
9	translational initiation	164	1.58479e-41	9.47179e-39	1.58479e-41	9.47179e-39	42	RPS28, RPL21, RPS11, M9, RPL41, RPS19, RPLP2, RPL30, RPS30, RPL35, RPS13, RPS2, RPS3, RPS12, RPL22, RPS24, RP40, RPL11, RPL26, RPL17, RPL29, RPL32, RPL38, RPS14, RPL34, RPL18, RPS29, RPS26, eIF2C2 (Argonaute-2), RPS23, RPL36, RPS17, RPS27A, RPS9, RPS15a, RPS7, RPL24, RPS25, RPL36A, RPL35a, RPS21, RPL23
10	nuclear-transcribed mRNA catabolic process	232	2.55705e-37	1.37544e-34	2.55705e-37	1.37544e-34	44	RPS28, RPL21, RPS11, RPL41, RPS19, KGUA, RPLP2, LSM6, RPL30, RPS30, RPL35, RPS13, RPS2, RPS3, RPS12, MTR3, RPL22, RPS24, RP40, RPL11, RPL26, RPL17, LSM3, RPL29, RPL32, RPL38, RPS14, RPL34, RPL18, RPS29, RPS26, RPS23, RPL36, RPS17, RPS27A, RPS9, RPS15a, RPS7, RPL24, RPS25, RPL36A, RPL35a, RPS21, RPL23
11	protein targeting to membrane	207	1.27684e-35	6.24375e-33	1.27684e-35	6.24375e-33	41	RPS28, RPL21, RPS11, RPL41, RPS19, RPLP2, RPL30, RPS30, RPL35, RPS13, RPS2, RPS3, RPS12, RPL22, RPS24, RP40, RPL11, RPL26, RPL17, RPL29, RPL32, RPL38, RPS14, RPL34, RPL18, RPS29, RPS26, RPS23, RPL36, RPS17, RPS27A, RPS9, p47-phox, RPS15a, RPS7, RPL24, RPS25, RPL36A, RPL35a, RPS21, RPL23
12	mRNA catabolic process	259	3.83669e-35	1.7198e-32	3.83669e-35	1.7198e-32	44	RPS28, RPL21, RPS11, RPL41, RPS19, KGUA, RPLP2, LSM6, RPL30, RPS30, RPL35, RPS13, RPS2, RPS3, RPS12, MTR3, RPL22, RPS24, RP40, RPL11, RPL26, RPL17, LSM3, RPL29, RPL32, RPL38, RPS14, RPL34, RPL18, RPS29, RPS26, RPS23, RPL36, RPS17, RPS27A, RPS9, RPS15a, RPS7, RPL24, RPS25, RPL36A, RPL35a, RPS21, RPL23
13	RNA catabolic process	303	4.12625e-32	1.70732e-29	4.12625e-32	1.70732e-29	44	RPS28, RPL21, RPS11, RPL41, RPS19, KGUA, RPLP2, LSM6, RPL30, RPS30, RPL35, RPS13, RPS2, RPS3, RPS12, MTR3, RPL22, RPS24, RP40, RPL11, RPL26, RPL17, LSM3, RPL29, RPL32, RPL38, RPS14, RPL34, RPL18, RPS29, RPS26, RPS23, RPL36, RPS17, RPS27A, RPS9, RPS15a, RPS7, RPL24, RPS25, RPL36A, RPL35a, RPS21, RPL23
14	peptide metabolic process	741	4.90281e-31	1.88373e-28	4.90281e-31	1.88373e-28	62	RPS28, RPL21, GSTP1, MRPL52, RPS11, M9, GSTs, RPL41, RPS19, RPLP2, MRPS21, RPL30, EMAPII, RPS30, RPL35, RPS13, RPS2, MRPL53, RPS3, MMP-13, RPS12, Ubi-L, RPL22, RPS24, RP40, RPL11, RPL26, GSTA4, RPL17, RPL29, SPC12, RPL32, Glyoxalase II, RPL38, RPS14, RPL34, RPL18, GPX, RPS29, RPS26, eIF2C2 (Argonaute-2), CKBBP2, RPS23, RPL36, RPS17, RPS27A, RPS9, CD13, eEF1D, RPS15a, RPS7, CDKAL1, RPL24, Cathepsi…
15	establishment of protein localization to membrane	348	1.37099e-30	4.91636e-28	1.37099e-30	4.91636e-28	45	RPS28, RPL21, RPS11, RPL41, RPS19, RPLP2, RPL30, RPS30, RPL35, RPS13, RPS2, RPS3, RPS12, RPL22, RPS24, Syntaxin 3, RP40, RPL11, RPL26, RPL17, RPL29, RPL32, RPL38, RPS14, RPL34, RPL18, RPS29, RPS26, RPS23, RPL36, RPS17, RPS27A, RPS9, p47-phox, RPS15a, SNAP-23, RPS7, RPL24, RPS25, Raftlin, RPL36A, RPL35a, ATP1beta subunit, RPS21, RPL23
16	peptide biosynthetic process	567	8.3371e-30	2.80283e-27	8.3371e-30	2.80283e-27	54	RPS28, RPL21, MRPL52, RPS11, M9, GSTs, RPL41, RPS19, RPLP2, MRPS21, RPL30, EMAPII, RPS30, RPL35, RPS13, RPS2, MRPL53, RPS3, RPS12, Ubi-L, RPL22, RPS24, RP40, RPL11, RPL26, RPL17, RPL29, RPL32, Glyoxalase II, RPL38, RPS14, RPL34, RPL18, RPS29, RPS26, eIF2C2 (Argonaute-2), CKBBP2, RPS23, RPL36, RPS17, RPS27A, RPS9, eEF1D, RPS15a, RPS7, CDKAL1, RPL24, RPS25, RPL36A, RPL35a, MRPS28, Rpl22l1, RPS21, R…
17	translation	536	4.27975e-29	1.35416e-26	4.27975e-29	1.35416e-26	52	RPS28, RPL21, MRPL52, RPS11, M9, RPL41, RPS19, RPLP2, MRPS21, RPL30, EMAPII, RPS30, RPL35, RPS13, RPS2, MRPL53, RPS3, RPS12, Ubi-L, RPL22, RPS24, RP40, RPL11, RPL26, RPL17, RPL29, RPL32, RPL38, RPS14, RPL34, RPL18, RPS29, RPS26, eIF2C2 (Argonaute-2), CKBBP2, RPS23, RPL36, RPS17, RPS27A, RPS9, eEF1D, RPS15a, RPS7, CDKAL1, RPL24, RPS25, RPL36A, RPL35a, MRPS28, Rpl22l1, RPS21, RPL23
18	aromatic compound catabolic process	562	4.20363e-28	1.19343e-25	4.20363e-28	1.19343e-25	52	RPS28, RPL21, RPS11, dUTPase (DUT), GSTs, RPL41, RPS19, KGUA, RPLP2, LSM6, RPL30, RPS30, RPL35, RPS13, RPS2, RPS3, RPS12, MTR3, RPL22, RPS24, RP40, RPL11, RPL26, RPL17, Heme oxygenase 1, LSM3, RPL29, RPL32, UGT1A4, RPL38, RPS14, RPL34, RPL18, GPX, RPS29, RPS26, UGT, RPS23, RPL36, RPS17, RPS27A, RPS9, p47-phox, RPS15a, RPS7, RPL24, RPS25, RPL36A, RPL35a, RPS21, RPL23, HPD
19	cellular nitrogen compound catabolic process	537	4.2155e-28	1.19343e-25	4.2155e-28	1.19343e-25	51	RPS28, RPL21, RPS11, dUTPase (DUT), RPL41, RPS19, KGUA, RPLP2, LSM6, RPL30, RPS30, RPL35, RPS13, RPS2, RPS3, RPS12, MTR3, RPL22, RPS24, RP40, RPL11, RPL26, RPL17, Heme oxygenase 1, LSM3, CYP3A7, RPL29, RPL32, UGT1A4, RPL38, RPS14, RPL34, RPL18, GPX, RPS29, RPS26, UGT, RPS23, RPL36, RPS17, RPS27A, RPS9, p47-phox, RPS15a, RPS7, RPL24, RPS25, RPL36A, RPL35a, RPS21, RPL23
20	heterocycle catabolic process	543	7.12685e-28	1.91677e-25	7.12685e-28	1.91677e-25	51	RPS28, RPL21, RPS11, dUTPase (DUT), GSTs, RPL41, RPS19, KGUA, RPLP2, LSM6, RPL30, RPS30, RPL35, RPS13, RPS2, RPS3, RPS12, MTR3, RPL22, RPS24, RP40, RPL11, RPL26, RPL17, Heme oxygenase 1, LSM3, RPL29, RPL32, UGT1A4, RPL38, RPS14, RPL34, RPL18, GPX, RPS29, RPS26, UGT, RPS23, RPL36, RPS17, RPS27A, RPS9, p47-phox, RPS15a, RPS7, RPL24, RPS25, RPL36A, RPL35a, RPS21, RPL23
21	amide biosynthetic process	717	2.24697e-27	5.75545e-25	2.24697e-27	5.75545e-25	57	RPS28, RPL21, MRPL52, RPS11, M9, KAR, GSTs, RPL41, RPS19, RPLP2, MRPS21, RPL30, EMAPII, RPS30, RPL35, RPS13, RPS2, MRPL53, C/EBP, RPS3, RPS12, Ubi-L, RPL22, RPS24, RP40, RPL11, RPL26, RPL17, RPL29, RPL32, Glyoxalase II, RPL38, RPS14, RPL34, RPL18, RPS29, RPS26, eIF2C2 (Argonaute-2), CKBBP2, RPS23, RPL36, RPS17, RPS27A, RPS9, eEF1D, RPS15a, RPS7, CDKAL1, RPL24, RPS25, ELOVL4, RPL36A, RPL35a, MRPS2…
22	nucleobase-containing compound catabolic process	467	4.98422e-27	1.21864e-24	4.98422e-27	1.21864e-24	47	RPS28, RPL21, RPS11, dUTPase (DUT), RPL41, RPS19, KGUA, RPLP2, LSM6, RPL30, RPS30, RPL35, RPS13, RPS2, RPS3, RPS12, MTR3, RPL22, RPS24, RP40, RPL11, RPL26, RPL17, LSM3, RPL29, RPL32, RPL38, RPS14, RPL34, RPL18, GPX, RPS29, RPS26, RPS23, RPL36, RPS17, RPS27A, RPS9, p47-phox, RPS15a, RPS7, RPL24, RPS25, RPL36A, RPL35a, RPS21, RPL23
23	organic cyclic compound catabolic process	625	8.41058e-27	1.96698e-24	8.41058e-27	1.96698e-24	53	RPS28, RPL21, RPS11, dUTPase (DUT), GSTs, RPL41, RPS19, KGUA, RPLP2, LSM6, RPL30, RPS30, RPL35, RPS13, RPS2, RPS3, RPS12, MTR3, RPL22, RPS24, RP40, RPL11, RPL26, RPL17, Heme oxygenase 1, LSM3, RPL29, RPL32, UGT1A4, RPL38, RPS14, RPL34, RPL18, GPX, RPS29, RPS26, UGT, RPS23, RPL36, RPS17, RPS27A, RPS9, p47-phox, RPS15a, RPS7, RPL24, RPS25, RPL36A, RPL35a, CYP46, RPS21, RPL23, HPD
24	protein localization to membrane	716	1.53629e-26	3.44322e-24	1.53629e-26	3.44322e-24	56	RPS28, RPL21, Annexin II, Tubby, RPS11, RPL41, RPS19, RPLP2, RPL30, RPS30, RPL35, RPS13, RPS2, RPS3, PLEKHF1, RPS12, RPL22, RPS24, Syntaxin 3, MUNC18, RP40, RPL11, RPL26, NR1, RPL17, RPL29, RPL32, Girdin, RPL38, RPS14, RPL34, RPL18, RPS29, RPS26, RPS23, S100, EHD2, RPL36, RPS17, RPS27A, RPS9, p47-phox, RPS15a, SNAP-23, Ionotropic glutamate receptor, RPS7, RPL24, RPS25, Raftlin, RPL36A, RPL35a, Ka…
25	protein targeting	458	1.84037e-25	3.95973e-23	1.84037e-25	3.95973e-23	45	RPS28, RPL21, RPS11, GSTs, RPL41, RPS19, RPLP2, RPL30, RPS30, RPL35, RPS13, RPS2, RPS3, RPS12, RPL22, RPS24, RP40, RPL11, RPL26, RPL17, HAOX1, RPL29, SPC12, RPL32, RPL38, RPS14, RPL34, RPL18, RPS29, RPS26, RPS23, RPL36, RPS17, RPS27A, RPS9, p47-phox, RPS15a, RPS7, RPL24, RPS25, RPL36A, RPL35a, Clusterin, RPS21, RPL23
26	cellular amide metabolic process	1100	1.05229e-24	2.17702e-22	1.05229e-24	2.17702e-22	66	RPS28, RPL21, GSTP1, MRPL52, RPS11, M9, KAR, GSTs, RPL41, RPS19, RPLP2, MRPS21, RPL30, EMAPII, RPS30, RPL35, RPS13, RPS2, MRPL53, C/EBP, RPS3, MMP-13, RPS12, Ubi-L, RPL22, RPS24, RP40, RPL11, RPL26, GSTA4, RPL17, RPL29, ATF/CREB, SPC12, RPL32, Glyoxalase II, RPL38, RPS14, RPL34, RPL18, GPX, RPS29, RPS26, eIF2C2 (Argonaute-2), CKBBP2, RPS23, RPL36, RPS17, RPS27A, RPS9, CD13, eEF1D, RPS15a, RPS7, C…
27	organonitrogen compound biosynthetic process	1833	2.18433e-22	4.35167e-20	2.18433e-22	4.35167e-20	82	RPS28, RPL21, CGAT1, GSTP1, MRPL52, RPS11, M9, GSTO1, KAR, dUTPase (DUT), Keratocan, GSTs, RPL41, RPS19, KGUA, RPLP2, MRPS21, RPL30, EMAPII, GALNT13, Fatty acid-binding protein, RPS30, NDPK B, RPL35, Prolargin, RPS13, IL-1 beta, RPS2, MRPL53, C/EBP, RPS3, RPS12, Exostosin-1, Ubi-L, RPL22, RPS24, RP40, RPL11, Creatine kinase, RPL26, GSTA4, RPL17, RPL29, RPL32, Aggrecan, Glyoxalase II, RPL38, RPS14…
28	cytoplasmic translation	91	1.28225e-21	2.46329e-19	1.28225e-21	2.46329e-19	22	RPS28, M9, RPL41, RPL30, RPS2, RPL22, RPL11, RPL26, RPL17, RPL29, RPL32, RPL38, RPL18, RPS29, RPS26, RPS23, RPL36, RPL24, RPL36A, RPL35a, Rpl22l1, RPS21
29	cellular nitrogen compound biosynthetic process	2190	5.54706e-21	1.02888e-18	5.54706e-21	1.02888e-18	88	RPS28, RPL21, MRPL52, NeuroD6, RPS11, AP-1, IRF9, M9, KAR, dUTPase (DUT), GSTs, RPL41, KLF11 (TIEG2), RPS19, KGUA, JunB, RPLP2, MRPS21, RPL30, EMAPII, Fra-1, RPS30, NDPK B, NMI, RPL35, RPS13, RPS2, MRPL53, C/EBP, RPS3, RPS12, Ubi-L, RPL22, RPS24, RP40, RPL11, RPL26, RPL17, RPL29, ATF/CREB, RPL32, Glyoxalase II, RPL38, RPS14, RPL34, RPL18, GPX, AK1, RPS29, RPS26, eIF2C2 (Argonaute-2), VDR, CKBBP2,…
30	interspecies interaction between organisms	3302	1.02258e-20	1.83349e-18	1.02258e-20	1.83349e-18	111	RPS28, RPL21, Annexin II, GSTP1, RPS11, AP-1, IRF9, IRF1, Galpha(q)-specific amine GPCRs, GSTs, CARP, RPL41, RPS19, JunB, Peroxiredoxin, MMP-9, RPLP2, PAI1, FKBP5, GPX2, RPL30, IRF7, EMAPII, Fra-1, Fatty acid-binding protein, RPS30, NMI, RPL35, RPS13, IL-1 beta, RPS2, C/EBP, RPS3, SBNO2, RPS12, BATF2, Exostosin-1, PRDX2, Ubi-L, PGRP-S, Villin 1, COCH, RPL22, RPS24, MUNC18, RP40, RPL11, RPL26, MKP…
31	establishment of protein localization to organelle	583	2.45685e-20	4.26303e-18	2.45685e-20	4.26303e-18	44	RPS28, RPL21, RPS11, GSTs, RPL41, RPS19, RPLP2, RPL30, RPS30, RPL35, RPS13, RPS2, RPS3, RPS12, RPL22, RPS24, RP40, RPL11, RPL26, RPL17, HAOX1, RPL29, SPC12, RPL32, RPL38, RPS14, RPL34, RPL18, RPS29, RPS26, RPS23, RPL36, RPS17, RPS27A, RPS9, RPS15a, RPS7, RPL24, RPS25, RPL36A, RPL35a, Clusterin, RPS21, RPL23
32	symbiotic process	1282	4.17445e-19	7.01699e-17	4.17445e-19	7.01699e-17	63	RPS28, RPL21, Annexin II, RPS11, AP-1, Galpha(q)-specific amine GPCRs, RPL41, RPS19, MMP-9, RPLP2, GPX2, RPL30, IRF7, RPS30, RPL35, RPS13, RPS2, C/EBP, RPS3, RPS12, PGRP-S, RPL22, RPS24, RP40, RPL11, RPL26, RPL17, Heme oxygenase 1, RPL29, ATF/CREB, SPC12, RPL32, CACNA1 L-type, RPL38, RPS14, Fibronectin, Beta-2-microglobulin, RPL34, RPL18, GPX, RPS29, RPS26, CKBBP2, RPS23, RPL36, RPS17, RPS27A, RP…
33	response to light stimulus	557	1.31001e-18	2.13532e-16	1.31001e-18	2.13532e-16	41	HMDH, Tubby, AP-1, Galpha(q)-specific amine GPCRs, ABCR, JunB, MMP-9, G-protein beta, CACNA1F, RPL35, Exostosin-1, RPL26, NR1, Rhodopsin, alpha-1 Adrenergic receptor, ATF/CREB, Opsin-3, CACNA1 L-type, RPGRIP1, RRH, GPX, G-protein beta/gamma, JunB/Fra-1, MAT2A, Bcl-3, G-protein gamma, Galpha(i)-specific metabotropic glutamate GPCRs, Fra-2, ROM1, TULP1, ATOH7, RDH13, JunB/Fra-2, RS1, ELOVL4, c-Fos,…
34	mRNA metabolic process	849	2.0621e-18	3.26236e-16	2.0621e-18	3.26236e-16	50	RPS28, RPL21, RPS11, RPL41, RPS19, KGUA, RPLP2, LSM6, RPL30, RPS30, RPL35, RPS13, RPS2, C/EBP, RPS3, RPS12, MTR3, RPL22, RPS24, RP40, RPL11, RPL26, RPL17, LSM3, DDX47, RPL29, ATF/CREB, RPL32, RPL38, RPS14, RPL34, RPL18, RPS29, RPS26, eIF2C2 (Argonaute-2), RPS23, Gemin7, RPL36, RPS17, RPS27A, RPS9, eEF1D, RPS15a, RPS7, RPL24, RPS25, RPL36A, RPL35a, RPS21, RPL23
35	organic substance biosynthetic process	3778	3.85934e-18	5.93125e-16	3.85934e-18	5.93125e-16	115	RPS28, HMDH, RPL21, CGAT1, GSTP1, MRPL52, NeuroD6, RPS11, CYP51A1, AP-1, IRF9, M9, GSTO1, KAR, dUTPase (DUT), Keratocan, GSTs, RPL41, KLF11 (TIEG2), RPS19, KGUA, JunB, RPLP2, Glycogenin-1, MRPS21, RPL30, EMAPII, GALNT13, Fra-1, Fatty acid-binding protein, G6PT, SC4MOL, RPS30, NDPK B, NMI, RPL35, Prolargin, RPS13, IL-1 beta, RPS2, MRPL53, C/EBP, RPS3, RPS12, Exostosin-1, Ubi-L, RPL22, RPS24, RP40,…
36	macromolecule biosynthetic process	2391	5.54127e-18	8.27958e-16	5.54127e-18	8.27958e-16	87	RPS28, RPL21, CGAT1, MRPL52, NeuroD6, RPS11, AP-1, IRF9, M9, dUTPase (DUT), Keratocan, RPL41, KLF11 (TIEG2), RPS19, JunB, RPLP2, Glycogenin-1, MRPS21, RPL30, EMAPII, GALNT13, Fra-1, RPS30, NMI, RPL35, Prolargin, RPS13, IL-1 beta, RPS2, MRPL53, C/EBP, RPS3, RPS12, Exostosin-1, Ubi-L, RPL22, RPS24, RP40, RPL11, RPL26, RPL17, RPL29, ATF/CREB, RPL32, Girdin, Aggrecan, RPL38, RPS14, RPL34, RPL18, RPS2…
37	cellular catabolic process	2373	1.17038e-17	1.67353e-15	1.17038e-17	1.67353e-15	86	RPS28, RPL21, CYP2C19, RPS11, GSTO1, dUTPase (DUT), Keratocan, GSTs, HBD, RPL41, RPS19, KGUA, Peroxiredoxin, RPLP2, LSM6, RPL30, CDC26, Fatty acid-binding protein, G6PT, PSME2, RPS30, RPL35, Prolargin, RPS13, RPS2, RPS3, MMP-13, RPS12, MTR3, PRDX2, RPL22, RPS24, RP40, RPL11, RPL26, RPL17, HAOX1, Heme oxygenase 1, LSM3, CYP3A7, RPL29, Sestrin 2, Prickle4, NEDD8, RPL32, Aggrecan, UGT1A4, Glyoxalase…
38	macromolecule catabolic process	1372	1.18226e-17	1.67353e-15	1.18226e-17	1.67353e-15	63	RPS28, RPL21, Annexin II, RPS11, Keratocan, RPL41, RPS19, KGUA, RPLP2, LSM6, RPL30, CDC26, G6PT, PSME2, RPS30, RPL35, Prolargin, RPS13, RPS2, RPS3, RPS12, Exostosin-1, MTR3, PGRP-S, RPL22, RPS24, RP40, RPL11, RPL26, RPL17, LSM3, RPL29, NEDD8, RPL32, Aggrecan, RPL38, RPS14, RPL34, RPL18, RPS29, RPS26, HYAL4, RPS23, RPL36, RPS17, RPS27A, Neuroglycan C, RPS9, RPS15a, Versican proteoglycan, RPS7, C10…
39	biosynthetic process	3856	1.85336e-17	2.55622e-15	1.85336e-17	2.55622e-15	115	RPS28, HMDH, RPL21, CGAT1, GSTP1, MRPL52, NeuroD6, RPS11, CYP51A1, AP-1, IRF9, M9, GSTO1, KAR, dUTPase (DUT), Keratocan, GSTs, RPL41, KLF11 (TIEG2), RPS19, KGUA, JunB, RPLP2, Glycogenin-1, MRPS21, RPL30, EMAPII, GALNT13, Fra-1, Fatty acid-binding protein, G6PT, SC4MOL, RPS30, NDPK B, NMI, RPL35, Prolargin, RPS13, IL-1 beta, RPS2, MRPL53, C/EBP, RPS3, RPS12, Exostosin-1, Ubi-L, RPL22, RPS24, RP40,…
40	cellular macromolecule biosynthetic process	2323	3.60613e-17	4.84935e-15	3.60613e-17	4.84935e-15	84	RPS28, RPL21, CGAT1, MRPL52, NeuroD6, RPS11, AP-1, IRF9, M9, dUTPase (DUT), RPL41, KLF11 (TIEG2), RPS19, JunB, RPLP2, Glycogenin-1, MRPS21, RPL30, EMAPII, GALNT13, Fra-1, RPS30, NMI, RPL35, RPS13, RPS2, MRPL53, C/EBP, RPS3, RPS12, Exostosin-1, Ubi-L, RPL22, RPS24, RP40, RPL11, RPL26, RPL17, RPL29, ATF/CREB, RPL32, Girdin, Aggrecan, RPL38, RPS14, RPL34, RPL18, RPS29, RPS26, eIF2C2 (Argonaute-2), V…
41	viral process	1133	1.77104e-16	2.32351e-14	1.77104e-16	2.32351e-14	55	RPS28, RPL21, Annexin II, RPS11, Galpha(q)-specific amine GPCRs, RPL41, RPS19, MMP-9, RPLP2, RPL30, IRF7, RPS30, RPL35, RPS13, RPS2, C/EBP, RPS3, RPS12, RPL22, RPS24, RP40, RPL11, RPL26, RPL17, RPL29, ATF/CREB, SPC12, RPL32, CACNA1 L-type, RPL38, RPS14, Beta-2-microglobulin, RPL34, RPL18, RPS29, RPS26, CKBBP2, RPS23, RPL36, RPS17, RPS27A, RPS9, CD13, RPS15a, RPS7, RPL24, Cathepsin V, RPS25, Claud…
42	system development	6754	1.96282e-16	2.51381e-14	1.96282e-16	2.51381e-14	162	CGAT1, Annexin II, GSTP1, NeuroD6, BHLHB4, Tubby, AP-1, IRF1, Galpha(q)-specific amine GPCRs, GABA-C receptors, CBX7, PMCA1, dUTPase (DUT), Keratocan, GSTs, CARP, KLF11 (TIEG2), RPS19, COX VIIb, JunB, MUSTANG, Peroxiredoxin, ESM-1, MMP-9, COL25A1, PAI1, NeuroD2, RPL30, EMAPII, G-protein beta, Fra-1, Fatty acid-binding protein, TGF-alpha, RGS8, COX VIb, Prdm8, CACNA1F, CD133, NDPK B, IRXL1, Prolar…
43	catabolic process	2743	2.67431e-16	3.34537e-14	2.67431e-16	3.34537e-14	91	RPS28, RPL21, CYP2C19, Annexin II, RPS11, GSTO1, dUTPase (DUT), Keratocan, GSTs, HBD, RPL41, RPS19, KGUA, Peroxiredoxin, MMP-9, RPLP2, LSM6, RPL30, CDC26, Fatty acid-binding protein, G6PT, PSME2, RPS30, RPL35, Prolargin, RPS13, RPS2, RPS3, MMP-13, RPS12, Exostosin-1, MTR3, PRDX2, PGRP-S, RPL22, RPS24, RP40, RPL11, RPL26, RPL17, HAOX1, Heme oxygenase 1, LSM3, CYP3A7, RPL29, Sestrin 2, Prickle4, NE…
44	transport	5945	4.93914e-16	6.03809e-14	4.93914e-16	6.03809e-14	148	RPS28, RPL21, SV2B, Annexin II, GSTP1, AQ12A, Tubby, StARD4, RPS11, KV1.6, AP-1, TMEM14A, Galpha(q)-specific amine GPCRs, 90K, GABA-C receptors, PMCA1, GSTs, ABCR, HBD, RPL41, Calgizzarin, RPS19, KGUA, COX VIIb, Peroxiredoxin, NDUFA6, MMP-9, RPLP2, PAI1, Glycogenin-1, SLC3A2, RPL30, Fatty acid-binding protein, TGF-alpha, G6PT, PSME2, COX VIb, RPS30, CACNA1F, NDPK B, SLC2A6, NHEDC2, RPL35, SERPINB…
45	protein localization to organelle	1009	5.07648e-16	6.06809e-14	5.07648e-16	6.06809e-14	51	RPS28, RPL21, Tubby, RPS11, Galpha(q)-specific amine GPCRs, GSTs, RPL41, RPS19, RPLP2, RPL30, RPS30, RPL35, RPS13, RPS2, RPS3, RPS12, RPL22, RPS24, RP40, RPL11, RPL26, RPL17, HAOX1, RPL29, SPC12, RPL32, RPL38, RPS14, RPL34, RPL18, RPS29, RPS26, RPS23, RPL36, RPS17, RPS27A, RPS9, RPS15a, Bcl-3, Ionotropic glutamate receptor, RPS7, ROM1, RPL24, TULP1, RPS25, RPL36A, RPL35a, Kainate receptor, Cluste…
46	response to external stimulus	4087	5.30028e-16	6.19787e-14	5.30028e-16	6.19787e-14	116	HMDH, GSTP1, Tubby, AP-1, IRF9, IRF1, Galpha(q)-specific amine GPCRs, PMCA1, GSTs, ABCR, CARP, RPS19, JunB, Peroxiredoxin, MMP-9, PAI1, FKBP5, GPX2, RPL30, IRF7, EMAPII, G-protein beta, Fra-1, Fatty acid-binding protein, G6PT, RPS30, CACNA1F, NMI, IL-1 beta, C/EBP, SBNO2, MMP-13, Proglucagon, BATF2, Exostosin-1, PRDX2, Ubi-L, PGRP-S, Villin 1, COCH, PRTG, MUNC18, Stanniocalcin 1, RPL26, NR1, MKP-…
47	response to radiation	802	7.42082e-16	8.49289e-14	7.42082e-16	8.49289e-14	45	HMDH, Tubby, AP-1, Galpha(q)-specific amine GPCRs, ABCR, JunB, MMP-9, G-protein beta, CACNA1F, RPL35, IL-1 beta, Exostosin-1, RPL26, NR1, Rhodopsin, alpha-1 Adrenergic receptor, ATF/CREB, Opsin-3, SOCS3, CACNA1 L-type, RPGRIP1, Aggrecan, RRH, GPX, G-protein beta/gamma, JunB/Fra-1, MAT2A, eEF1D, Bcl-3, G-protein gamma, Galpha(i)-specific metabotropic glutamate GPCRs, Fra-2, ROM1, TULP1, ATOH7, RDH…
48	organic substance catabolic process	2306	8.18789e-16	9.17555e-14	8.18789e-16	9.17555e-14	81	RPS28, RPL21, Annexin II, RPS11, dUTPase (DUT), Keratocan, GSTs, RPL41, RPS19, KGUA, RPLP2, LSM6, RPL30, CDC26, Fatty acid-binding protein, G6PT, PSME2, RPS30, RPL35, Prolargin, RPS13, RPS2, RPS3, MMP-13, RPS12, Exostosin-1, MTR3, PGRP-S, RPL22, RPS24, RP40, RPL11, RPL26, RPL17, HAOX1, Heme oxygenase 1, LSM3, CYP3A7, RPL29, Sestrin 2, NEDD8, RPL32, Aggrecan, UGT1A4, Glyoxalase II, RPL38, RPS14, R…
49	cellular biosynthetic process	3629	9.53213e-16	1.04639e-13	9.53213e-16	1.04639e-13	107	RPS28, HMDH, RPL21, CGAT1, GSTP1, MRPL52, NeuroD6, RPS11, AP-1, IRF9, M9, GSTO1, KAR, dUTPase (DUT), Keratocan, GSTs, RPL41, KLF11 (TIEG2), RPS19, KGUA, JunB, RPLP2, Glycogenin-1, MRPS21, RPL30, EMAPII, GALNT13, Fra-1, Fatty acid-binding protein, RPS30, NDPK B, NMI, RPL35, Prolargin, RPS13, IL-1 beta, RPS2, MRPL53, C/EBP, RPS3, RPS12, Exostosin-1, Ubi-L, RPL22, RPS24, RP40, RPL11, RPL26, GSTA4, R…
50	detection of visible light	101	2.12458e-15	2.28562e-13	2.12458e-15	2.28562e-13	18	Tubby, Galpha(q)-specific amine GPCRs, ABCR, G-protein beta, CACNA1F, Rhodopsin, Opsin-3, CACNA1 L-type, RPGRIP1, RRH, G-protein beta/gamma, G-protein gamma, Galpha(i)-specific metabotropic glutamate GPCRs, ROM1, TULP1, RS1, ELOVL4, Galpha(t)-specific GPCRs

## Sheet: Table S3.2-mRNA-GO-IPP
Enrichment analysis report
Enrichment by GO Processes					IPP-Con_log2(1.5)all_FRC_RNA
#	Processes	Total	pValue	Min FDR	p-value	FDR	In Data	Network Objects from Active Data
1	system development	6754	1.04355e-32	8.03009e-29	1.04355e-32	8.03009e-29	280	PTPR-beta, ITGA4, Plexin A2, CBSL, COL1A1, BHLHB4, K(+) channel, subfamily J, RXRA, BIN1 (Amphiphysin II), Delta-sarcoglycan, IRF1, G-protein alpha-11, FHL2, CARP, COX-2 (PTGS2), KLF11 (TIEG2), RBP-J kappa (CBF1), JunB, Connexin 50, DGK-gamma, MUSTANG, ESM-1, Leptin receptor, CACNG, Pappalysin-2, ARG2, HB-EGF, PLA2, CACNA1C, ECE2, NeuroD2, GABA-A receptor gamma-2 subunit, SFRP, G-protein beta, Fr…
2	multicellular organism development	7593	1.93991e-29	7.46379e-26	1.93991e-29	8.91138e-16	294	PTPR-beta, ITGA4, Plexin A2, CBSL, COL1A1, BHLHB4, K(+) channel, subfamily J, RXRA, BIN1 (Amphiphysin II), Delta-sarcoglycan, IRF1, GCNF, G-protein alpha-11, FHL2, CARP, COX-2 (PTGS2), KLF11 (TIEG2), RBP-J kappa (CBF1), JunB, Connexin 50, DGK-gamma, MUSTANG, ESM-1, Leptin receptor, CACNG, Pappalysin-2, ARG2, HB-EGF, DUOX1, PLA2, OTUD7B, CACNA1C, ECE2, NeuroD2, GABA-A receptor gamma-2 subunit, SFR…
3	anatomical structure development	8098	1.46441e-27	3.75622e-24	1.46441e-27	3.75622e-24	302	PTPR-beta, ITGA4, Plexin A2, CBSL, COL1A1, BHLHB4, K(+) channel, subfamily J, RXRA, BIN1 (Amphiphysin II), Delta-sarcoglycan, IRF1, GCNF, ADAM12, G-protein alpha-11, FHL2, CARP, COX-2 (PTGS2), KLF11 (TIEG2), RBP-J kappa (CBF1), JunB, Plectin 1, Connexin 50, DGK-gamma, MUSTANG, ESM-1, Leptin receptor, CACNG, Pappalysin-2, ARG2, HB-EGF, DUOX1, PLA2, OTUD7B, CACNA1C, ECE2, NeuroD2, GABA-A receptor g…
4	response to organic cyclic compound	1955	9.58424e-27	1.84377e-23	9.58424e-27	1.84377e-23	123	CBSL, COL1A1, K(+) channel, subfamily J, RXRA, IRF1, G-protein alpha-11, FHL2, CARP, COX-2 (PTGS2), JunB, Leptin receptor, CACNG, ARG2, DUOX1, PLA2, GABA-A receptor gamma-2 subunit, SFRP, G-protein beta, Fra-1, IL-1 beta, C/EBP, Galectin-1, SREBP1 precursor, TNF-R1, ALDOB, MUNC18, Caspase-1, PDE, Thrombospondin 1, CYP3A7, ASNS, MSN (moesin), RGS4, CACNA1 L-type, GADD34, Fibronectin, AACS, Activin…
5	response to oxygen-containing compound	2992	1.84489e-26	2.83928e-23	1.84489e-26	2.83928e-23	158	ITGA4, CBSL, COL1A1, K(+) channel, subfamily J, RXRA, IRF1, G-protein alpha-11, CARP, COX-2 (PTGS2), KLF11 (TIEG2), JunB, Leptin receptor, CACNG, ARG2, DUOX1, PLA2, CACNA1C, SFRP, G-protein beta, Fra-1, WNT3A, IL-1 beta, IBP1, C/EBP, Galectin-1, SREBP1 precursor, Exostosin-1, TNF-R1, ALDOB, MUNC18, Caspase-1, PDE, Thrombospondin 1, CYP3A7, ASNS, Sestrin 2, MSN (moesin), RGS4, CACNA1 L-type, GADD3…
6	response to abiotic stimulus	2080	2.15966e-25	2.67194e-22	2.15966e-25	2.67194e-22	125	CBSL, COL1A1, K(+) channel, subfamily J, IRF1, G-protein alpha-11, CARP, COX-2 (PTGS2), RBP-J kappa (CBF1), JunB, Leptin receptor, Pappalysin-2, ARG2, PLA2, CACNA1C, NeuroD2, SFRP, G-protein beta, Fra-1, PSME2, IL-1 beta, S-arrestin, Exostosin-1, KCC2, TNF-R1, Caspase-1, PDE, Thrombospondin 1, ASNS, OPSG2, HIPK2, GADD45 alpha, CACNA1 L-type, GADD34, Keratin 8, RRH, CRP, G-protein beta/gamma, Myog…
7	animal organ development	5194	2.75721e-25	2.67194e-22	2.75721e-25	2.67194e-22	221	ITGA4, Plexin A2, CBSL, COL1A1, BHLHB4, K(+) channel, subfamily J, RXRA, Delta-sarcoglycan, IRF1, G-protein alpha-11, FHL2, CARP, COX-2 (PTGS2), KLF11 (TIEG2), RBP-J kappa (CBF1), JunB, Connexin 50, MUSTANG, Leptin receptor, Pappalysin-2, ARG2, HB-EGF, PLA2, CACNA1C, ECE2, NeuroD2, SFRP, G-protein beta, Fra-1, WNT3A, HOXA5, C/EBP, Galectin-1, SREBP1 precursor, BATF2, Exostosin-1, SLC17A7, TNF-R1,…
8	developmental process	8706	2.77784e-25	2.67194e-22	2.77784e-25	2.67194e-22	311	PTPR-beta, ITGA4, Plexin A2, CBSL, COL1A1, BHLHB4, K(+) channel, subfamily J, RXRA, BIN1 (Amphiphysin II), Delta-sarcoglycan, IRF1, SOAT1, GCNF, ADAM12, G-protein alpha-11, FHL2, CARP, COX-2 (PTGS2), KLF11 (TIEG2), RBP-J kappa (CBF1), JunB, Plectin 1, Connexin 50, DGK-gamma, MUSTANG, ESM-1, Leptin receptor, CACNG, Pappalysin-2, ARG2, HB-EGF, DUOX1, PLA2, OTUD7B, CACNA1C, ECE2, NeuroD2, GABA-A rec…
9	response to lipid	1829	2.36744e-24	2.02416e-21	2.36744e-24	2.02416e-21	114	COL1A1, K(+) channel, subfamily J, RXRA, IRF1, FHL2, CARP, COX-2 (PTGS2), JunB, Leptin receptor, ARG2, PLA2, SFRP, G-protein beta, Fra-1, WNT3A, IL-1 beta, C/EBP, SREBP1 precursor, TNF-R1, ALDOB, MUNC18, Caspase-1, PDE, Thrombospondin 1, CYP3A7, MSN (moesin), CACNA1 L-type, Fibronectin, AACS, Activin B, CRP, ERM proteins, G-protein beta/gamma, SUR, VDR, WNT9A, Rnf14 (ARA54), Galpha(i)-specific pe…
10	multicellular organismal process	10586	5.23197e-24	4.026e-21	5.23197e-24	4.026e-21	351	PTPR-beta, ITGA4, Plexin A2, CBSL, COL1A1, BHLHB4, K(+) channel, subfamily J, RXRA, BIN1 (Amphiphysin II), Delta-sarcoglycan, IRF1, SOAT1, GCNF, G-protein alpha-11, FHL2, SMVT, CARP, COX-2 (PTGS2), KLF11 (TIEG2), RBP-J kappa (CBF1), JunB, Plectin 1, Connexin 50, DGK-gamma, MUSTANG, ESM-1, Leptin receptor, CACNG, Pappalysin-2, ARG2, HB-EGF, DUOX1, PLA2, OTUD7B, CACNA1C, ECE2, NeuroD2, GABA-A recep…
11	response to radiation	802	1.66786e-23	1.16674e-20	1.66786e-23	1.16674e-20	71	K(+) channel, subfamily J, G-protein alpha-11, COX-2 (PTGS2), JunB, CACNA1C, SFRP, G-protein beta, IL-1 beta, S-arrestin, Exostosin-1, PDE, ASNS, OPSG2, GADD45 alpha, CACNA1 L-type, GADD34, RRH, CRP, G-protein beta/gamma, SUR, Galpha(i)-specific peptide GPCRs, JunB/Fra-1, GPR52, TGF-beta 1, Rho GTPase, SFRP2, G-protein gamma, OPSG3, TGF-beta, Fra-2, ROM1, RDH13, RS1, ELOVL4, Recoverin, HMDH, AP-1…
12	response to external stimulus	4087	2.00316e-23	1.28452e-20	2.00316e-23	1.28452e-20	185	ITGA4, NLRC5, Plexin A2, CBSL, COL1A1, K(+) channel, subfamily J, RXRA, IRF1, G-protein alpha-11, CARP, COX-2 (PTGS2), RBP-J kappa (CBF1), JunB, Plectin 1, Leptin receptor, CACNG, ARG2, HB-EGF, PLA2, SFRP, IRF7, G-protein beta, Fra-1, WNT3A, IL-1 beta, C/EBP, S-arrestin, SREBP1 precursor, BATF2, Exostosin-1, C7, LIPE, TNF-R1, PRTG, ALDOB, MUNC18, Caspase-1, CMKLR1, PDE, Thrombospondin 1, ASNS, Se…
13	response to organic substance	4930	1.45714e-22	8.62517e-20	1.45714e-22	8.62517e-20	207	ITGA4, CBSL, COL1A1, K(+) channel, subfamily J, RXRA, IRF1, G-protein alpha-11, CREB-H, FHL2, CARP, COX-2 (PTGS2), KLF11 (TIEG2), JunB, Leptin receptor, IL-2R beta chain, MXRA5, CACNG, ARG2, DUOX1, PLA2, CACNA1C, GABA-A receptor gamma-2 subunit, SFRP, IRF7, G-protein beta, Fra-1, PSME2, WNT3A, IL-1 beta, IBP1, TIMP2, C/EBP, ETR101, Galectin-1, SREBP1 precursor, Exostosin-1, Sequestosome 1(p62), S…
14	cellular response to organic substance	3766	2.31372e-22	1.27172e-19	2.31372e-22	1.27172e-19	173	ITGA4, COL1A1, K(+) channel, subfamily J, RXRA, IRF1, G-protein alpha-11, CREB-H, FHL2, CARP, COX-2 (PTGS2), KLF11 (TIEG2), JunB, Leptin receptor, IL-2R beta chain, ARG2, DUOX1, PLA2, CACNA1C, GABA-A receptor gamma-2 subunit, SFRP, IRF7, G-protein beta, PSME2, WNT3A, IL-1 beta, IBP1, TIMP2, C/EBP, Galectin-1, SREBP1 precursor, Exostosin-1, Sequestosome 1(p62), Syntaxin 3, TNF-R1, ALDOB, IL11RA, M…
15	cellular response to chemical stimulus	4582	2.82352e-21	1.44846e-18	2.82352e-21	1.44846e-18	194	ITGA4, CBSL, COL1A1, K(+) channel, subfamily J, RXRA, IRF1, G-protein alpha-11, CREB-H, FHL2, CARP, COX-2 (PTGS2), KLF11 (TIEG2), RBP-J kappa (CBF1), JunB, Leptin receptor, IL-2R beta chain, ARG2, HB-EGF, DUOX1, PLA2, CACNA1C, NeuroD2, GABA-A receptor gamma-2 subunit, SFRP, IRF7, G-protein beta, PSME2, WNT3A, IL-1 beta, IBP1, TIMP2, C/EBP, Galectin-1, SREBP1 precursor, Exostosin-1, Sequestosome 1…
16	female pregnancy	482	3.53195e-21	1.69865e-18	3.53195e-21	1.69865e-18	52	CBSL, RXRA, IRF1, COX-2 (PTGS2), JunB, Plectin 1, Leptin receptor, ARG2, PLA2, SFRP, Fra-1, IL-1 beta, IL11RA, CYP3A7, IL-11 receptor, SUR, VDR, JunB/Fra-1, TGF-beta 1, Galpha(q)-specific THRH&S GPCRs, TGF-beta, Fra-2, Cathepsin V, WNT, TGF-beta receptor type II, ACE2, AP-1, MMP-9, PAI1, RAR-gamma/RXR-alpha, VDR/RXR-alpha, Stanniocalcin 2, RAR, Oviductin, Galpha(q)-specific peptide GPCRs, Angiopo…
17	response to corticosteroid	483	3.8789e-21	1.75577e-18	3.8789e-21	1.75577e-18	52	COL1A1, K(+) channel, subfamily J, RXRA, COX-2 (PTGS2), JunB, Leptin receptor, ARG2, PLA2, SFRP, Fra-1, IL-1 beta, C/EBP, ALDOB, CYP3A7, Fibronectin, Galpha(i)-specific peptide GPCRs, JunB/Fra-1, TGF-beta 1, Galpha(q)-specific THRH&S GPCRs, Rho GTPase, Ionotropic glutamate receptor, C3, TGF-beta, Cathepsin V, PTAFR, WNT, Insulin receptor, AP-1, PMCA1, PAI1, Annexin I, Fatty acid-binding protein, …
18	response to organonitrogen compound	1986	6.03077e-21	2.57815e-18	6.03077e-21	2.57815e-18	113	ITGA4, CBSL, COL1A1, K(+) channel, subfamily J, RXRA, IRF1, G-protein alpha-11, COX-2 (PTGS2), KLF11 (TIEG2), JunB, CACNG, ARG2, DUOX1, PLA2, CACNA1C, GABA-A receptor gamma-2 subunit, SFRP, G-protein beta, Fra-1, IL-1 beta, IBP1, C/EBP, SREBP1 precursor, Exostosin-1, TNF-R1, ALDOB, Caspase-1, PDE, ASNS, Sestrin 2, RGS4, CACNA1 L-type, GADD34, Fibronectin, AACS, DT3UO, Activin B, HABP2, ERM protei…
19	response to nitrogen compound	2119	1.15279e-20	4.66879e-18	1.15279e-20	4.66879e-18	117	ITGA4, CBSL, COL1A1, K(+) channel, subfamily J, RXRA, IRF1, G-protein alpha-11, COX-2 (PTGS2), KLF11 (TIEG2), JunB, CACNG, ARG2, DUOX1, PLA2, CACNA1C, GABA-A receptor gamma-2 subunit, SFRP, G-protein beta, Fra-1, IL-1 beta, IBP1, C/EBP, SREBP1 precursor, Exostosin-1, TNF-R1, ALDOB, Caspase-1, PDE, Thrombospondin 1, ASNS, Sestrin 2, RGS4, CACNA1 L-type, GADD34, Fibronectin, AACS, DT3UO, Activin B,…
20	regulation of multicellular organismal process	4748	1.25508e-20	4.75075e-18	1.25508e-20	4.75075e-18	197	NLRC5, Plexin A2, COL1A1, BHLHB4, K(+) channel, subfamily J, RXRA, BIN1 (Amphiphysin II), CYP51A1, IRF1, ADAM12, CARP, COX-2 (PTGS2), RBP-J kappa (CBF1), DGK-gamma, MUSTANG, Leptin receptor, LINGO4, CACNG, ARG2, HB-EGF, PLA2, OTUD7B, CACNA1C, NeuroD2, SFRP, IRF7, PSME2, WNT3A, CD200 (OX-2), HOXA5, IL-1 beta, TIMP2, C/EBP, Galectin-1, SREBP1 precursor, SCN4A(SkM1), LIPE, TNF-R1, PRTG, Synaptotagmi…
21	multi-multicellular organism process	535	1.2965e-20	4.75075e-18	1.2965e-20	4.75075e-18	54	CBSL, RXRA, IRF1, COX-2 (PTGS2), JunB, Plectin 1, Leptin receptor, ARG2, PLA2, SFRP, Fra-1, IL-1 beta, IL11RA, CYP3A7, IL-11 receptor, SUR, VDR, JunB/Fra-1, TGF-beta 1, Galpha(q)-specific THRH&S GPCRs, TGF-beta, Fra-2, Cathepsin V, PTAFR, WNT, TGF-beta receptor type II, ACE2, AP-1, MMP-9, PAI1, RAR-gamma/RXR-alpha, VDR/RXR-alpha, Stanniocalcin 2, RAR, Oviductin, Galpha(q)-specific peptide GPCRs, …
22	cellular response to cytokine stimulus	1558	4.51942e-20	1.58077e-17	4.51942e-20	1.58077e-17	96	ITGA4, COL1A1, K(+) channel, subfamily J, IRF1, CARP, COX-2 (PTGS2), JunB, Leptin receptor, IL-2R beta chain, ARG2, DUOX1, PLA2, SFRP, IRF7, PSME2, IL-1 beta, C/EBP, Sequestosome 1(p62), Syntaxin 3, TNF-R1, IL11RA, MUNC18, Caspase-1, CMKLR1, PDE, Thrombospondin 1, FASN, MSN (moesin), Tyk2, Fibronectin, IL-11 receptor, Keratin 8, Activin B, CRP, ERM proteins, Galpha(i)-specific peptide GPCRs, JunB…
23	response to extracellular stimulus	1042	4.78357e-20	1.60042e-17	4.78357e-20	1.60042e-17	76	ITGA4, CBSL, COL1A1, RXRA, COX-2 (PTGS2), Plectin 1, Leptin receptor, ARG2, PLA2, SFRP, Fra-1, IL-1 beta, C/EBP, SREBP1 precursor, LIPE, ALDOB, ASNS, Sestrin 2, GADD34, IL-11 receptor, AACS, DT3UO, Activin B, CRP, ATF-3, VDR, Galpha(i)-specific peptide GPCRs, HIG1, JunB/Fra-1, TGF-beta 1, ADAM-TS1, Galpha(q)-specific THRH&S GPCRs, SFRP2, GNPAT, TCF8, TGF-beta, Cathepsin V, LDLR, TIEG, SOAT2, gp13…
24	response to purine-containing compound	346	5.00233e-20	1.60387e-17	5.00233e-20	1.60387e-17	43	COL1A1, K(+) channel, subfamily J, COX-2 (PTGS2), JunB, DUOX1, PLA2, Fra-1, IL-1 beta, SREBP1 precursor, ALDOB, Caspase-1, PDE, CACNA1 L-type, GADD34, AACS, Activin B, ERM proteins, SUR, JunB/Fra-1, PDE4, Fra-2, PTAFR, WNT, PDE2A, AP-1, DGK, PAI1, Activin beta B, TOP1, IBP, ATF/CREB, FosB/JunB, MAT2A, Activin, Phosphatase regulator (inhibitor), FosB, JunB/Fra-2, CNG-alpha, c-Fos, PDE4D, SRD5A1, J…
25	regulation of biological quality	5809	6.00091e-20	1.84708e-17	6.00091e-20	1.84708e-17	224	SV2B, Plexin A2, CBSL, COL1A1, K(+) channel, subfamily J, BIN1 (Amphiphysin II), Delta-sarcoglycan, IRF1, SOAT1, G-protein alpha-11, COX-2 (PTGS2), TRH receptor, RBP-J kappa (CBF1), DGK-gamma, Leptin receptor, DUOXA2, LINGO4, CACNG, DUOX1, PLA2, CACNA1C, ECE2, NeuroD2, GABA-A receptor gamma-2 subunit, SFRP, G-protein beta, PSME2, WNT3A, G-protein beta3/gamma13, HOXA5, IL-1 beta, C/EBP, Galectin-1…
26	response to cytokine	1767	8.50378e-20	2.49964e-17	8.50378e-20	2.49964e-17	103	ITGA4, COL1A1, K(+) channel, subfamily J, IRF1, CARP, COX-2 (PTGS2), JunB, Leptin receptor, IL-2R beta chain, ARG2, DUOX1, PLA2, SFRP, IRF7, Fra-1, PSME2, IL-1 beta, TIMP2, C/EBP, Exostosin-1, Sequestosome 1(p62), Syntaxin 3, TNF-R1, ALDOB, IL11RA, MUNC18, Caspase-1, CMKLR1, PDE, Thrombospondin 1, FASN, MSN (moesin), Tyk2, Fibronectin, IL-11 receptor, Keratin 8, Activin B, CRP, ERM proteins, Galp…
27	response to glucocorticoid	441	8.77068e-20	2.49964e-17	8.77068e-20	2.49964e-17	48	K(+) channel, subfamily J, RXRA, COX-2 (PTGS2), JunB, Leptin receptor, ARG2, PLA2, SFRP, Fra-1, IL-1 beta, C/EBP, ALDOB, CYP3A7, Fibronectin, Galpha(i)-specific peptide GPCRs, JunB/Fra-1, TGF-beta 1, Galpha(q)-specific THRH&S GPCRs, Rho GTPase, C3, TGF-beta, Cathepsin V, PTAFR, WNT, Insulin receptor, AP-1, PMCA1, PAI1, Annexin I, Fatty acid-binding protein, RAR-gamma/RXR-alpha, VDR/RXR-alpha, Gal…
28	negative regulation of multicellular organismal process	1931	1.95076e-19	5.3611e-17	1.95076e-19	5.3611e-17	108	NLRC5, BHLHB4, BIN1 (Amphiphysin II), CYP51A1, IRF1, COX-2 (PTGS2), RBP-J kappa (CBF1), ARG2, PLA2, OTUD7B, NeuroD2, SFRP, WNT3A, CD200 (OX-2), HOXA5, IL-1 beta, Galectin-1, TNF-R1, PRTG, LGALS9C, CMKLR1, Synaptotagmin, PDE, ATP1B2, Thrombospondin 1, RGS4, GADD45 alpha, Fibronectin, DT3UO, Activin B, ERM proteins, TNMD, SUR, WNT9A, Galpha(i)-specific peptide GPCRs, TGF-beta 1, ADAM-TS1, Galpha(q)…
29	regulation of developmental process	3978	2.05004e-19	5.43966e-17	2.05004e-19	5.43966e-17	172	Plexin A2, COL1A1, BHLHB4, RXRA, BIN1 (Amphiphysin II), JDP2, IRF1, ADAM12, G-protein alpha-11, CARP, COX-2 (PTGS2), RBP-J kappa (CBF1), JunB, DGK-gamma, MUSTANG, LINGO4, CACNG, ARG2, PLA2, CACNA1C, NeuroD2, SFRP, IRF7, G-protein beta, PSME2, WNT3A, G-protein beta3/gamma13, HOXA5, IL-1 beta, TIMP2, C/EBP, Galectin-1, TNF-R1, PRTG, Synaptotagmin II, CMKLR1, Synaptotagmin, PDE, ATP1B2, Thrombospond…
30	response to peptide	977	2.90699e-19	7.45643e-17	2.90699e-19	7.45643e-17	72	ITGA4, COL1A1, RXRA, IRF1, COX-2 (PTGS2), KLF11 (TIEG2), JunB, PLA2, CACNA1C, SFRP, IL-1 beta, IBP1, SREBP1 precursor, ALDOB, PDE, Sestrin 2, CACNA1 L-type, Fibronectin, Activin B, HABP2, SUR, VDR, Galpha(i)-specific peptide GPCRs, JunB/Fra-1, TGF-beta 1, Galpha(q)-specific THRH&S GPCRs, Rho GTPase, Ionotropic glutamate receptor, TGF-beta, Fra-2, LDLR, TIEG, WNT, Insulin receptor, AP-1, A20, MMP-…
31	response to drug	942	6.15761e-19	1.52848e-16	6.15761e-19	1.52848e-16	70	COL1A1, K(+) channel, subfamily J, CARP, COX-2 (PTGS2), JunB, ARG2, SFRP, Fra-1, IL-1 beta, TIMP2, C/EBP, Galectin-1, SREBP1 precursor, KCC2, ALDOB, Caspase-1, PDE, Thrombospondin 1, GADD34, Fibronectin, AACS, DT3UO, SUR, Galpha(i)-specific peptide GPCRs, JunB/Fra-1, GPR52, TGF-beta 1, Adipophilin, Rho GTPase, PDE4, Ionotropic glutamate receptor, SFRP2, GNPAT, TGF-beta, CYP2W1, TGF-beta receptor …
32	response to steroid hormone	737	7.85987e-19	1.89005e-16	7.85987e-19	1.89005e-16	61	COL1A1, K(+) channel, subfamily J, RXRA, FHL2, COX-2 (PTGS2), JunB, Leptin receptor, ARG2, PLA2, SFRP, Fra-1, IL-1 beta, C/EBP, SREBP1 precursor, ALDOB, Thrombospondin 1, CYP3A7, Fibronectin, Rnf14 (ARA54), Galpha(i)-specific peptide GPCRs, JunB/Fra-1, TGF-beta 1, Galpha(q)-specific THRH&S GPCRs, Rho GTPase, Ionotropic glutamate receptor, C3, TGF-beta, Fra-2, Cathepsin V, PTAFR, WNT, TGF-beta rec…
33	small molecule metabolic process	2298	8.32325e-19	1.94083e-16	8.32325e-19	1.94083e-16	119	CBSL, MAGI-3, K(+) channel, subfamily J, RXRA, CYP51A1, SOAT1, SMVT, COX-2 (PTGS2), ELOVL5, Leptin receptor, Tenascin-X, ARG2, PLA2, SC4MOL, Prolargin, IL-1 beta, IBP1, C/EBP, SREBP1 precursor, Exostosin-1, LIPE, AASS, TNF-R1, ALDOB, DHRS3, ELOVL6, PDE, CYP3A7, ASNS, Sestrin 2, FASN, ERG1, GDPD2, Glyoxalase II, AACS, AASDH, ATF-3, INPP4A, FADS3, VDR, Galpha(i)-specific peptide GPCRs, PMM1, MAMDC2…
34	maternal process involved in female pregnancy	168	8.71157e-19	1.97163e-16	8.71157e-19	1.97163e-16	30	CBSL, RXRA, COX-2 (PTGS2), JunB, ARG2, PLA2, SFRP, IL11RA, IL-11 receptor, VDR, JunB/Fra-1, Galpha(q)-specific THRH&S GPCRs, Cathepsin V, WNT, ACE2, AP-1, PAI1, RAR-gamma/RXR-alpha, VDR/RXR-alpha, Stanniocalcin 2, Angiopoietin 2, CGI-38, FosB/JunB, Ihh, Hedgehog, CBS, RXR, JunB/Fra-2, JunB/c-Fos, JunB/JunB
35	response to organophosphorus	305	1.04891e-18	2.3061e-16	1.04891e-18	2.3061e-16	39	COL1A1, K(+) channel, subfamily J, COX-2 (PTGS2), JunB, DUOX1, PLA2, Fra-1, IL-1 beta, SREBP1 precursor, ALDOB, Caspase-1, PDE, Activin B, ERM proteins, SUR, JunB/Fra-1, PDE4, Fra-2, PTAFR, WNT, PDE2A, AP-1, DGK, PAI1, Activin beta B, TOP1, IBP, ATF/CREB, FosB/JunB, MAT2A, Activin, FosB, JunB/Fra-2, CNG-alpha, c-Fos, PDE4D, SRD5A1, JunB/c-Fos, JunB/JunB
36	tissue development	2786	1.58378e-18	3.38534e-16	1.58378e-18	3.38534e-16	134	ITGA4, Plexin A2, CBSL, COL1A1, RXRA, Delta-sarcoglycan, FHL2, CARP, COX-2 (PTGS2), RBP-J kappa (CBF1), JunB, Plectin 1, MUSTANG, ARG2, HB-EGF, PLA2, SFRP, Mesogenin 1, WNT3A, HOXA5, IBP1, C/EBP, Exostosin-1, IL11RA, BPAG2, PDE, Thrombospondin 1, FASN, MSN (moesin), RGS4, CACNA1 L-type, Fibronectin, IL-11 receptor, AACS, Keratin 8, ZIC2, ATF-3, ERM proteins, TNMD, VDR, WNT9A, Galpha(i)-specific p…
37	response to light stimulus	557	2.12578e-18	4.42105e-16	2.12578e-18	4.42105e-16	52	K(+) channel, subfamily J, G-protein alpha-11, COX-2 (PTGS2), JunB, CACNA1C, G-protein beta, S-arrestin, Exostosin-1, PDE, ASNS, OPSG2, CACNA1 L-type, GADD34, RRH, G-protein beta/gamma, SUR, JunB/Fra-1, GPR52, G-protein gamma, OPSG3, Fra-2, ROM1, RDH13, RS1, ELOVL4, Recoverin, HMDH, AP-1, ABCR, MMP-9, RHBDD1, Rhodopsin, ATF/CREB, RPGRIP1, FosB/JunB, MAT2A, Phosphatase regulator (inhibitor), MFAP4…
38	regulation of signaling	4971	2.4896e-18	4.9482e-16	2.4896e-18	4.9482e-16	197	ARHGAP20, NLRC5, CBSL, COL1A1, MAGI-3, K(+) channel, subfamily J, IRF1, FHL2, CARP, COX-2 (PTGS2), RBP-J kappa (CBF1), DGK-gamma, ESM-1, Leptin receptor, Tenascin-X, CACNG, ARG2, HB-EGF, PLA2, OTUD7B, CACNA1C, NeuroD2, SFRP, IRF7, PSME2, WNT3A, DUSP8, IL-1 beta, Arrestin 3, IBP1, TIMP2, KIAA1244, S-arrestin, Galectin-1, SREBP1 precursor, PIP5K2C, GluR5, Sequestosome 1(p62), Syntaxin 3, TNF-R1, Sy…
39	circulatory system development	1432	2.52012e-18	4.9482e-16	2.52012e-18	4.9482e-16	88	PTPR-beta, ITGA4, COL1A1, K(+) channel, subfamily J, RXRA, Delta-sarcoglycan, G-protein alpha-11, FHL2, CARP, COX-2 (PTGS2), RBP-J kappa (CBF1), JunB, ESM-1, Leptin receptor, HB-EGF, CACNA1C, ECE2, SFRP, Fra-1, WNT3A, TNF-R1, DHRS3, PDE, Kir1.1, Thrombospondin 1, CACNA1 L-type, Fibronectin, DT3UO, Myoglobin, VDR, Galpha(i)-specific peptide GPCRs, JunB/Fra-1, TGF-beta 1, ADAM-TS1, COL8A2, Rho GTPa…
40	positive regulation of multicellular organismal process	2770	2.57216e-18	4.9482e-16	2.57216e-18	4.9482e-16	133	Plexin A2, COL1A1, BIN1 (Amphiphysin II), IRF1, ADAM12, CARP, COX-2 (PTGS2), RBP-J kappa (CBF1), MUSTANG, Leptin receptor, LINGO4, CACNG, HB-EGF, PLA2, NeuroD2, SFRP, IRF7, WNT3A, CD200 (OX-2), HOXA5, IL-1 beta, TIMP2, C/EBP, Galectin-1, LIPE, TNF-R1, Synaptotagmin II, ELOVL6, LGALS9C, Caspase-1, CMKLR1, Synaptotagmin, PDE, ATP1B2, Thrombospondin 1, HIPK2, RGS4, C6, GDPD2, Fibronectin, IL-11 rece…
41	response to cAMP	233	2.91932e-18	5.47906e-16	2.91932e-18	5.47906e-16	34	COL1A1, JunB, DUOX1, PLA2, Fra-1, SREBP1 precursor, ALDOB, PDE, Activin B, ERM proteins, JunB/Fra-1, PDE4, Fra-2, PTAFR, WNT, PDE2A, AP-1, DGK, PAI1, Activin beta B, TOP1, IBP, ATF/CREB, FosB/JunB, MAT2A, Activin, FosB, JunB/Fra-2, CNG-alpha, c-Fos, PDE4D, SRD5A1, JunB/c-Fos, JunB/JunB
42	anatomical structure morphogenesis	3270	3.51291e-18	6.43615e-16	3.51291e-18	6.43615e-16	148	PTPR-beta, ITGA4, Plexin A2, CBSL, COL1A1, BHLHB4, RXRA, Delta-sarcoglycan, ADAM12, FHL2, CARP, COX-2 (PTGS2), RBP-J kappa (CBF1), JunB, MUSTANG, ESM-1, Leptin receptor, Pappalysin-2, HB-EGF, PLA2, CACNA1C, SFRP, Mesogenin 1, WNT3A, HOXA5, C/EBP, Exostosin-1, PRTG, DHRS3, MUNC18, Caspase-1, PDE, Thrombospondin 1, HIPK2, MSN (moesin), CACNA1 L-type, Fibronectin, Keratin 8, ZIC2, ERM proteins, G-pr…
43	nervous system development	3688	4.97972e-18	8.91138e-16	4.97972e-18	8.91138e-16	160	ITGA4, Plexin A2, CBSL, BHLHB4, K(+) channel, subfamily J, RXRA, BIN1 (Amphiphysin II), CARP, RBP-J kappa (CBF1), DGK-gamma, Leptin receptor, CACNG, HB-EGF, PLA2, ECE2, NeuroD2, GABA-A receptor gamma-2 subunit, SFRP, G-protein beta, WNT3A, IL-1 beta, TIMP2, C/EBP, IGSF21, ETR101, Galectin-1, Exostosin-1, GluR5, KCC2, MafK, SLC17A7, KIAA1853, Syntaxin 3, PRTG, Synaptotagmin II, MUNC18, Synaptotagm…
44	cellular response to external stimulus	570	5.74511e-18	1.00474e-15	5.74511e-18	1.00474e-15	52	ITGA4, CBSL, COL1A1, K(+) channel, subfamily J, IRF1, CARP, COX-2 (PTGS2), SFRP, Fra-1, IL-1 beta, SREBP1 precursor, TNF-R1, ALDOB, Caspase-1, PDE, ASNS, Sestrin 2, GADD45 alpha, GADD34, Activin B, ATF-3, VDR, HIG1, JunB/Fra-1, TGF-beta 1, ADAM-TS1, Rho GTPase, SFRP2, TGF-beta, Cathepsin V, TIEG, WNT, PDE2A, AP-1, PMCA1, BAG-3, MMP-9, PAI1, MTMR3, Activin beta B, VDR/RXR-alpha, Collagen II, Galph…
45	response to nutrient levels	988	7.85158e-18	1.34262e-15	7.85158e-18	1.34262e-15	70	CBSL, COL1A1, RXRA, COX-2 (PTGS2), Plectin 1, Leptin receptor, ARG2, PLA2, SFRP, IL-1 beta, C/EBP, SREBP1 precursor, LIPE, ALDOB, ASNS, Sestrin 2, GADD34, IL-11 receptor, AACS, DT3UO, Activin B, CRP, ATF-3, VDR, Galpha(i)-specific peptide GPCRs, HIG1, TGF-beta 1, ADAM-TS1, Galpha(q)-specific THRH&S GPCRs, SFRP2, GNPAT, TCF8, TGF-beta, Cathepsin V, LDLR, TIEG, SOAT2, gp130, WNT, TGF-beta receptor …
46	regulation of cell communication	4929	1.14577e-17	1.91667e-15	1.14577e-17	1.91667e-15	194	ARHGAP20, NLRC5, CBSL, COL1A1, MAGI-3, K(+) channel, subfamily J, IRF1, FHL2, CARP, COX-2 (PTGS2), RBP-J kappa (CBF1), DGK-gamma, ESM-1, Leptin receptor, Tenascin-X, CACNG, ARG2, HB-EGF, PLA2, OTUD7B, CACNA1C, NeuroD2, SFRP, IRF7, PSME2, WNT3A, DUSP8, IL-1 beta, Arrestin 3, IBP1, TIMP2, KIAA1244, S-arrestin, Galectin-1, SREBP1 precursor, PIP5K2C, GluR5, Sequestosome 1(p62), Syntaxin 3, TNF-R1, Sy…
47	positive regulation of developmental process	2258	1.31181e-17	2.14773e-15	1.31181e-17	2.14773e-15	115	Plexin A2, COL1A1, BIN1 (Amphiphysin II), IRF1, ADAM12, CARP, COX-2 (PTGS2), RBP-J kappa (CBF1), JunB, MUSTANG, LINGO4, CACNG, ARG2, PLA2, NeuroD2, SFRP, WNT3A, HOXA5, IL-1 beta, TIMP2, C/EBP, Galectin-1, TNF-R1, Synaptotagmin II, CMKLR1, Synaptotagmin, PDE, ATP1B2, Thrombospondin 1, HIPK2, C6, GDPD2, Fibronectin, IL-11 receptor, CRP, ZIC2, ERM proteins, G-protein beta/gamma, eIF2C2 (Argonaute-2)…
48	regulation of cell differentiation	2891	1.376e-17	2.2059e-15	1.376e-17	2.2059e-15	135	Plexin A2, COL1A1, BHLHB4, BIN1 (Amphiphysin II), JDP2, IRF1, G-protein alpha-11, CARP, COX-2 (PTGS2), RBP-J kappa (CBF1), JunB, DGK-gamma, MUSTANG, CACNG, PLA2, NeuroD2, SFRP, IRF7, G-protein beta, PSME2, WNT3A, G-protein beta3/gamma13, HOXA5, IL-1 beta, TIMP2, C/EBP, Galectin-1, TNF-R1, PRTG, Synaptotagmin II, CMKLR1, Synaptotagmin, PDE, ATP1B2, Thrombospondin 1, Girdin, RGS4, GDPD2, Fibronecti…
49	decidualization	59	1.67982e-17	2.638e-15	1.67982e-17	2.638e-15	19	COX-2 (PTGS2), JunB, PLA2, SFRP, IL11RA, IL-11 receptor, VDR, JunB/Fra-1, Galpha(q)-specific THRH&S GPCRs, Cathepsin V, AP-1, PAI1, VDR/RXR-alpha, Stanniocalcin 2, CGI-38, FosB/JunB, JunB/Fra-2, JunB/c-Fos, JunB/JunB
50	response to hormone	1705	1.92882e-17	2.96846e-15	1.92882e-17	2.96846e-15	96	COL1A1, K(+) channel, subfamily J, RXRA, IRF1, FHL2, COX-2 (PTGS2), JunB, Leptin receptor, ARG2, PLA2, SFRP, G-protein beta, Fra-1, IL-1 beta, IBP1, TIMP2, C/EBP, SREBP1 precursor, ALDOB, PDE, Thrombospondin 1, CYP3A7, ASNS, Sestrin 2, Fibronectin, Activin B, ERM proteins, G-protein beta/gamma, Myoglobin, SUR, Rnf14 (ARA54), Galpha(i)-specific peptide GPCRs, JunB/Fra-1, TGF-beta 1, ADAM-TS1, Galp…

## Sheet: Table S3.3-mRNA-GO-BDE-47
Enrichment analysis report
Enrichment by GO Processes					BDE47-Con_log2(1.5)all_FRC_RNA
#	Processes	Total	pValue	Min FDR	p-value	FDR	In Data	Network Objects from Active Data
1	nervous system development	3688	5.19896e-23	2.613e-19	5.19896e-23	2.613e-19	88	ITGA4, PAX5, Plexin A2, Insulin receptor, Protocadherin 9, SSH1L, Activin B, KLF7, EPHA10, RXRA, BIN1 (Amphiphysin II), Galpha(q)-specific amine GPCRs, CSPG4 (NG2), Galpha(i)-specific amine GPCRs, APHC, WNT9A, MSK1, PBX, P/Q-type calcium channel alpha-1A subunit, Plexin B3, Ataxin-1, LZK(MAP3K13), DGK, ADAR2, DGK-gamma, Neuroligin, SVCT2, NLGN4Y, Krm, Activin, GRB10, Semaphorin 6B, ECE2, GABA-A r…
2	generation of neurons	2476	5.25252e-19	1.18898e-15	5.25252e-19	1.18898e-15	66	ITGA4, PAX5, Plexin A2, SSH1L, KLF7, EPHA10, RXRA, BIN1 (Amphiphysin II), Galpha(q)-specific amine GPCRs, CSPG4 (NG2), Galpha(i)-specific amine GPCRs, WNT9A, MSK1, PBX, P/Q-type calcium channel alpha-1A subunit, Plexin B3, Ataxin-1, LZK(MAP3K13), DGK, ADAR2, DGK-gamma, Neuroligin, SVCT2, Krm, Activin, GRB10, Semaphorin 6B, Phosphatase regulator (inhibitor), ProSAPiP1, CAMK1D, NAV1, RAR-gamma/RXR-…
3	neurogenesis	2636	7.097e-19	1.18898e-15	7.097e-19	1.18898e-15	68	ITGA4, PAX5, Plexin A2, SSH1L, KLF7, EPHA10, RXRA, BIN1 (Amphiphysin II), Galpha(q)-specific amine GPCRs, CSPG4 (NG2), Galpha(i)-specific amine GPCRs, WNT9A, MSK1, PBX, P/Q-type calcium channel alpha-1A subunit, Plexin B3, Ataxin-1, LZK(MAP3K13), DGK, ADAR2, DGK-gamma, Neuroligin, SVCT2, Krm, Activin, GRB10, Semaphorin 6B, Phosphatase regulator (inhibitor), ProSAPiP1, CAMK1D, NAV1, RAR-gamma/RXR-…
4	system development	6754	3.88485e-18	4.88132e-15	3.88485e-18	4.88132e-15	113	ITGA4, PAX5, PTHR1, Plexin A2, CLMP, Insulin receptor, Protocadherin 9, SSH1L, Creatine transporter 1 (SLC6A8), Activin B, KLF7, EPHA10, RXRA, BIN1 (Amphiphysin II), FAM73B, PDE2A, A20, CREB5, Galpha(q)-specific amine GPCRs, G-protein alpha-11, CSPG4 (NG2), Galpha(i)-specific amine GPCRs, VDR, APHC, WNT9A, MSK1, PBX, P/Q-type calcium channel alpha-1A subunit, Plexin B3, Ataxin-1, LZK(MAP3K13), DG…
5	cell-cell signaling	1697	5.68846e-18	5.71804e-15	5.68846e-18	5.71804e-15	53	Kir3.4, GluR7, eIF2C1 (Argonaute-1), SSH1L, Galpha(q)-specific amine GPCRs, eIF2C2 (Argonaute-2), G-protein alpha-11, Galpha(i)-specific amine GPCRs, WNT9A, P/Q-type calcium channel alpha-1A subunit, SV2C, Ataxin-1, Kindlin-2, DGK, ADAR2, Neuroligin, NLGN4Y, Krm, GIPC, Activin, GBR1, ECE2, CACNA1C, GABA-A receptor gamma-2 subunit, Phosphatase regulator (inhibitor), Galpha(q)-specific THRH&S GPCRs…
6	multicellular organism development	7593	1.17483e-17	9.84119e-15	1.17483e-17	9.84119e-15	120	ITGA4, PAX5, PTHR1, Plexin A2, CLMP, Insulin receptor, Protocadherin 9, SSH1L, Creatine transporter 1 (SLC6A8), Activin B, KLF7, EPHA10, RXRA, BIN1 (Amphiphysin II), FAM73B, PDE2A, SPRED2, A20, GCNF, CREB5, Galpha(q)-specific amine GPCRs, eIF2C2 (Argonaute-2), G-protein alpha-11, CSPG4 (NG2), Galpha(i)-specific amine GPCRs, VDR, APHC, WNT9A, MSK1, PBX, P/Q-type calcium channel alpha-1A subunit, P…
7	synaptic signaling	758	6.2699e-17	4.50179e-14	6.2699e-17	4.50179e-14	35	GluR7, SSH1L, Galpha(q)-specific amine GPCRs, G-protein alpha-11, Galpha(i)-specific amine GPCRs, P/Q-type calcium channel alpha-1A subunit, SV2C, Ataxin-1, DGK, ADAR2, Neuroligin, NLGN4Y, GIPC, CACNA1C, GABA-A receptor gamma-2 subunit, Phosphatase regulator (inhibitor), CACNA1D, Ionotropic glutamate receptor, ACM2, Exostosin-1, Dystrobrevin beta, Myosin Va, JIP-2, Synaptotagmin II, Synaptotagmin…
8	anatomical structure development	8098	7.94951e-17	4.99428e-14	7.94951e-17	4.99428e-14	123	ITGA4, PAX5, PTHR1, Plexin A2, CLMP, Insulin receptor, Protocadherin 9, SSH1L, Creatine transporter 1 (SLC6A8), ORP-family, Activin B, KLF7, EPHA10, RXRA, BIN1 (Amphiphysin II), FAM73B, PDE2A, SPRED2, A20, GCNF, CREB5, Galpha(q)-specific amine GPCRs, eIF2C2 (Argonaute-2), G-protein alpha-11, CSPG4 (NG2), Galpha(i)-specific amine GPCRs, VDR, APHC, WNT9A, MSK1, PBX, P/Q-type calcium channel alpha-1…
9	regulation of membrane potential	693	2.2008e-16	1.22902e-13	2.2008e-16	1.22902e-13	33	Kir3.4, GluR7, SSH1L, BIN1 (Amphiphysin II), Syntrophin A, Galpha(q)-specific amine GPCRs, G-protein alpha-11, Galpha(i)-specific amine GPCRs, P/Q-type calcium channel alpha-1A subunit, Ataxin-1, KCNH5, DGK, Neuroligin, Kv10.1, KCNH7, GBR1, CACNA1C, GABA-A receptor gamma-2 subunit, Phosphatase regulator (inhibitor), Nav1.6, CACNA1D, Ionotropic glutamate receptor, JIP-2, SCN9A, KCNQ2, Kainate rece…
10	chemical synaptic transmission	662	4.31509e-16	1.9716e-13	4.31509e-16	1.9716e-13	32	GluR7, SSH1L, Galpha(q)-specific amine GPCRs, Galpha(i)-specific amine GPCRs, P/Q-type calcium channel alpha-1A subunit, SV2C, Ataxin-1, DGK, ADAR2, Neuroligin, NLGN4Y, GIPC, CACNA1C, GABA-A receptor gamma-2 subunit, Phosphatase regulator (inhibitor), CACNA1D, Ionotropic glutamate receptor, ACM2, Exostosin-1, Myosin Va, JIP-2, Synaptotagmin II, Synaptotagmin, KCNQ2, Kainate receptor, CACNA1E, PDE…
11	anterograde trans-synaptic signaling	662	4.31509e-16	1.9716e-13	4.31509e-16	1.9716e-13	32	GluR7, SSH1L, Galpha(q)-specific amine GPCRs, Galpha(i)-specific amine GPCRs, P/Q-type calcium channel alpha-1A subunit, SV2C, Ataxin-1, DGK, ADAR2, Neuroligin, NLGN4Y, GIPC, CACNA1C, GABA-A receptor gamma-2 subunit, Phosphatase regulator (inhibitor), CACNA1D, Ionotropic glutamate receptor, ACM2, Exostosin-1, Myosin Va, JIP-2, Synaptotagmin II, Synaptotagmin, KCNQ2, Kainate receptor, CACNA1E, PDE…
12	cellular developmental process	5668	6.60578e-16	2.76672e-13	6.60578e-16	2.76672e-13	98	ITGA4, PAX5, PTHR1, Plexin A2, Insulin receptor, SSH1L, ORP-family, Activin B, KLF7, EPHA10, RXRA, BIN1 (Amphiphysin II), PDE2A, A20, GCNF, CREB5, Galpha(q)-specific amine GPCRs, eIF2C2 (Argonaute-2), CSPG4 (NG2), Galpha(i)-specific amine GPCRs, VDR, WNT9A, MSK1, PBX, P/Q-type calcium channel alpha-1A subunit, Plexin B3, Ataxin-1, LZK(MAP3K13), Kindlin-2, DGK, Paxillin, ADAR2, DGK-gamma, Neurolig…
13	regulation of nervous system development	1510	7.61683e-16	2.94479e-13	7.61683e-16	2.94479e-13	47	Plexin A2, SSH1L, Lrrc24, RXRA, BIN1 (Amphiphysin II), Galpha(q)-specific amine GPCRs, CSPG4 (NG2), Galpha(i)-specific amine GPCRs, PBX, P/Q-type calcium channel alpha-1A subunit, Plexin B3, Ataxin-1, LZK(MAP3K13), DGK, DGK-gamma, Neuroligin, SVCT2, Krm, Semaphorin 6B, Phosphatase regulator (inhibitor), ProSAPiP1, CAMK1D, Galpha(q)-specific THRH&S GPCRs, RAR-gamma/RXR-alpha, VDR/RXR-alpha, BMP re…
14	cell differentiation	5601	9.58448e-16	3.44083e-13	9.58448e-16	3.44083e-13	97	ITGA4, PAX5, PTHR1, Plexin A2, Insulin receptor, SSH1L, ORP-family, Activin B, KLF7, EPHA10, RXRA, BIN1 (Amphiphysin II), PDE2A, A20, GCNF, CREB5, Galpha(q)-specific amine GPCRs, eIF2C2 (Argonaute-2), CSPG4 (NG2), Galpha(i)-specific amine GPCRs, VDR, WNT9A, MSK1, PBX, P/Q-type calcium channel alpha-1A subunit, Plexin B3, Ataxin-1, LZK(MAP3K13), Kindlin-2, DGK, Paxillin, ADAR2, DGK-gamma, Neurolig…
15	developmental process	8706	1.26278e-15	4.23115e-13	1.26278e-15	4.23115e-13	126	ITGA4, PAX5, PTHR1, Plexin A2, CLMP, Insulin receptor, Protocadherin 9, SSH1L, Creatine transporter 1 (SLC6A8), ORP-family, Activin B, KLF7, EPHA10, RXRA, BIN1 (Amphiphysin II), FAM73B, PDE2A, SPRED2, A20, GCNF, CREB5, Galpha(q)-specific amine GPCRs, eIF2C2 (Argonaute-2), G-protein alpha-11, CSPG4 (NG2), Galpha(i)-specific amine GPCRs, VDR, APHC, WNT9A, MSK1, PBX, P/Q-type calcium channel alpha-1…
16	trans-synaptic signaling	690	1.3865e-15	4.35536e-13	1.3865e-15	4.35536e-13	32	GluR7, SSH1L, Galpha(q)-specific amine GPCRs, Galpha(i)-specific amine GPCRs, P/Q-type calcium channel alpha-1A subunit, SV2C, Ataxin-1, DGK, ADAR2, Neuroligin, NLGN4Y, GIPC, CACNA1C, GABA-A receptor gamma-2 subunit, Phosphatase regulator (inhibitor), CACNA1D, Ionotropic glutamate receptor, ACM2, Exostosin-1, Myosin Va, JIP-2, Synaptotagmin II, Synaptotagmin, KCNQ2, Kainate receptor, CACNA1E, PDE…
17	regulation of multicellular organismal process	4748	3.21414e-15	9.50251e-13	3.21414e-15	9.50251e-13	87	Kir3.4, Plexin A2, Insulin receptor, eIF2C1 (Argonaute-1), SSH1L, Activin B, KLF7, Lrrc24, RXRA, BIN1 (Amphiphysin II), Syntrophin A, SPRED2, A20, Galpha(q)-specific amine GPCRs, eIF2C2 (Argonaute-2), CSPG4 (NG2), Galpha(i)-specific amine GPCRs, VDR, WNT9A, MSK1, PBX, P/Q-type calcium channel alpha-1A subunit, Plexin B3, Ataxin-1, PER1, LZK(MAP3K13), DGK, Paxillin, DGK-gamma, Neuroligin, SVCT2, K…
18	regulation of cell communication	4929	3.10644e-14	8.67387e-12	3.10644e-14	8.67387e-12	87	GluR7, PAX5, Insulin receptor, eIF2C1 (Argonaute-1), SSH1L, ORP-family, Activin B, MAGI-3, KLF7, PDE2A, SPRED2, A20, Galpha(q)-specific amine GPCRs, HMHA1, CSPG4 (NG2), NF-AT5, Galpha(i)-specific amine GPCRs, WNT9A, P/Q-type calcium channel alpha-1A subunit, Ataxin-1, PER1, LZK(MAP3K13), DGK, Paxillin, DGK-gamma, Neuroligin, NLGN4Y, RASGRF2, MLK2(MAP3K10), Krm, GIPC, C18orf1, Kv10.1, Activin, CLO…
19	regulation of neurotransmitter secretion	226	3.63511e-14	9.61582e-12	3.63511e-14	9.61582e-12	19	Galpha(q)-specific amine GPCRs, Galpha(i)-specific amine GPCRs, P/Q-type calcium channel alpha-1A subunit, DGK, Neuroligin, GIPC, Kv10.1, Phosphatase regulator (inhibitor), CACNA1D, Ionotropic glutamate receptor, ACM2, Synaptotagmin II, Synaptotagmin, Kainate receptor, RIMS3, WNT, Neurabin-1, CACNA1 L-type, CHRM
20	modulation of chemical synaptic transmission	786	5.10994e-14	1.23532e-11	5.10994e-14	1.23532e-11	32	GluR7, SSH1L, Galpha(q)-specific amine GPCRs, Galpha(i)-specific amine GPCRs, P/Q-type calcium channel alpha-1A subunit, DGK, Neuroligin, NLGN4Y, RASGRF2, GIPC, Kv10.1, GBR1, Phosphatase regulator (inhibitor), Galpha(q)-specific THRH&S GPCRs, PDE4, CACNA1D, Ionotropic glutamate receptor, ACM2, RAR, JIP-2, SCN9A, Synaptotagmin II, Synaptotagmin, Kainate receptor, PDE, RIMS3, WNT, ATF/CREB, Neurabi…
21	regulation of signaling	4971	5.1615e-14	1.23532e-11	5.1615e-14	1.23532e-11	87	GluR7, PAX5, Insulin receptor, eIF2C1 (Argonaute-1), SSH1L, ORP-family, Activin B, MAGI-3, KLF7, PDE2A, SPRED2, A20, Galpha(q)-specific amine GPCRs, HMHA1, CSPG4 (NG2), NF-AT5, Galpha(i)-specific amine GPCRs, WNT9A, P/Q-type calcium channel alpha-1A subunit, Ataxin-1, PER1, LZK(MAP3K13), DGK, Paxillin, DGK-gamma, Neuroligin, NLGN4Y, RASGRF2, MLK2(MAP3K10), Krm, GIPC, C18orf1, Kv10.1, Activin, CLO…
22	regulation of trans-synaptic signaling	788	5.47697e-14	1.25124e-11	5.47697e-14	1.25124e-11	32	GluR7, SSH1L, Galpha(q)-specific amine GPCRs, Galpha(i)-specific amine GPCRs, P/Q-type calcium channel alpha-1A subunit, DGK, Neuroligin, NLGN4Y, RASGRF2, GIPC, Kv10.1, GBR1, Phosphatase regulator (inhibitor), Galpha(q)-specific THRH&S GPCRs, PDE4, CACNA1D, Ionotropic glutamate receptor, ACM2, RAR, JIP-2, SCN9A, Synaptotagmin II, Synaptotagmin, Kainate receptor, PDE, RIMS3, WNT, ATF/CREB, Neurabi…
23	signaling	7940	1.34166e-13	2.93181e-11	1.34166e-13	2.93181e-11	115	Kir3.4, ITGA4, GluR7, PTHR1, Plexin A2, Insulin receptor, eIF2C1 (Argonaute-1), SSH1L, Activin B, HIVEP2, MAGI-3, EPHA10, RXRA, BIN1 (Amphiphysin II), PDE2A, SPRED2, A20, GCNF, Galpha(q)-specific amine GPCRs, eIF2C2 (Argonaute-2), G-protein alpha-11, HMHA1, CSPG4 (NG2), NF-AT5, Galpha(i)-specific amine GPCRs, VDR, WNT9A, MSK1, PBX, P/Q-type calcium channel alpha-1A subunit, SV2C, Plexin B3, Ataxi…
24	regulation of multicellular organismal development	3202	1.891e-13	3.96006e-11	1.891e-13	3.96006e-11	66	Plexin A2, Insulin receptor, eIF2C1 (Argonaute-1), SSH1L, KLF7, Lrrc24, RXRA, BIN1 (Amphiphysin II), SPRED2, A20, Galpha(q)-specific amine GPCRs, eIF2C2 (Argonaute-2), CSPG4 (NG2), Galpha(i)-specific amine GPCRs, VDR, WNT9A, PBX, P/Q-type calcium channel alpha-1A subunit, Plexin B3, Ataxin-1, LZK(MAP3K13), DGK, Paxillin, DGK-gamma, Neuroligin, SVCT2, Krm, C18orf1, Activin, CLOCK, Semaphorin 6B, P…
25	cell communication	8097	2.06907e-13	4.15966e-11	2.06907e-13	4.15966e-11	116	Kir3.4, ITGA4, GluR7, PTHR1, Plexin A2, Insulin receptor, eIF2C1 (Argonaute-1), SSH1L, Activin B, HIVEP2, MAGI-3, EPHA10, RXRA, PDE2A, SPRED2, A20, GCNF, Galpha(q)-specific amine GPCRs, eIF2C2 (Argonaute-2), G-protein alpha-11, HMHA1, CSPG4 (NG2), NF-AT5, Galpha(i)-specific amine GPCRs, VDR, WNT9A, MSK1, PBX, P/Q-type calcium channel alpha-1A subunit, SV2C, Plexin B3, Ataxin-1, TRH receptor, LZK(…
26	regulation of biological quality	5809	3.07745e-13	5.88205e-11	3.07745e-13	5.88205e-11	94	Kir3.4, GluR7, PTHR1, Plexin A2, Insulin receptor, SSH1L, ORP-family, Activin B, KLF7, Lrrc24, BIN1 (Amphiphysin II), Syntrophin A, PDE2A, A20, ATP13A3, Galpha(q)-specific amine GPCRs, G-protein alpha-11, Galpha(i)-specific amine GPCRs, VDR, ATPase VC, P/Q-type calcium channel alpha-1A subunit, Plexin B3, Ataxin-1, TRH receptor, LZK(MAP3K13), KCNH5, Kindlin-2, DGK, Paxillin, DGK-gamma, Neuroligin…
27	regulation of ion transport	1127	3.15988e-13	5.88205e-11	3.15988e-13	5.88205e-11	37	Kir3.4, BIN1 (Amphiphysin II), Syntrophin A, Galpha(q)-specific amine GPCRs, Galpha(i)-specific amine GPCRs, VDR, P/Q-type calcium channel alpha-1A subunit, PER1, KCNH5, Neuroligin, RASGRF2, Kv10.1, PLA2R1, KCNH7, GBR1, CACNA1C, Nav1.6, VDR/RXR-alpha, PDE4, CACNA1D, Ionotropic glutamate receptor, Myosin Va, JIP-2, SCN9A, Synaptotagmin II, Kv1.4, Synaptotagmin, KCNQ2, Kainate receptor, CACNA1E, PD…
28	regulation of neurotransmitter transport	260	4.55443e-13	8.1752e-11	4.55443e-13	8.1752e-11	19	Galpha(q)-specific amine GPCRs, Galpha(i)-specific amine GPCRs, P/Q-type calcium channel alpha-1A subunit, DGK, Neuroligin, GIPC, Kv10.1, Phosphatase regulator (inhibitor), CACNA1D, Ionotropic glutamate receptor, ACM2, Synaptotagmin II, Synaptotagmin, Kainate receptor, RIMS3, WNT, Neurabin-1, CACNA1 L-type, CHRM
29	regulation of developmental process	3978	6.22429e-13	1.07873e-10	6.22429e-13	1.07873e-10	74	Plexin A2, Insulin receptor, eIF2C1 (Argonaute-1), SSH1L, KLF7, Lrrc24, RXRA, BIN1 (Amphiphysin II), SPRED2, A20, Galpha(q)-specific amine GPCRs, eIF2C2 (Argonaute-2), G-protein alpha-11, CSPG4 (NG2), Galpha(i)-specific amine GPCRs, VDR, WNT9A, ATPase VC, PBX, P/Q-type calcium channel alpha-1A subunit, Plexin B3, Ataxin-1, LZK(MAP3K13), Kindlin-2, DGK, Paxillin, DGK-gamma, Neuroligin, SVCT2, Krm,…
30	regulation of neurogenesis	1343	6.65887e-13	1.11558e-10	6.65887e-13	1.11558e-10	40	Plexin A2, SSH1L, BIN1 (Amphiphysin II), Galpha(q)-specific amine GPCRs, CSPG4 (NG2), Galpha(i)-specific amine GPCRs, PBX, P/Q-type calcium channel alpha-1A subunit, Plexin B3, Ataxin-1, LZK(MAP3K13), DGK, DGK-gamma, Neuroligin, SVCT2, Krm, Semaphorin 6B, Phosphatase regulator (inhibitor), ProSAPiP1, CAMK1D, BMP receptor 2, Ionotropic glutamate receptor, PTCHD2, RAR, XYLT1, TCF8, Krm1, Trim67, Sy…
31	regulation of cell differentiation	2891	8.31814e-13	1.34861e-10	8.31814e-13	1.34861e-10	61	Plexin A2, eIF2C1 (Argonaute-1), SSH1L, KLF7, BIN1 (Amphiphysin II), SPRED2, Galpha(q)-specific amine GPCRs, G-protein alpha-11, CSPG4 (NG2), Galpha(i)-specific amine GPCRs, VDR, WNT9A, PBX, P/Q-type calcium channel alpha-1A subunit, Plexin B3, Ataxin-1, LZK(MAP3K13), DGK, DGK-gamma, Neuroligin, SVCT2, Krm, C18orf1, Activin, CLOCK, Semaphorin 6B, Phosphatase regulator (inhibitor), CRB2, ProSAPiP1…
32	regulation of localization	4025	1.12959e-12	1.77416e-10	1.12959e-12	1.77416e-10	74	Kir3.4, ITGA4, Plexin A2, Insulin receptor, SSH1L, ORP-family, Activin B, KLF7, BIN1 (Amphiphysin II), Syntrophin A, Galpha(q)-specific amine GPCRs, eIF2C2 (Argonaute-2), Galpha(i)-specific amine GPCRs, VDR, P/Q-type calcium channel alpha-1A subunit, Plexin B3, PER1, KCNH5, DGK, ADAR2, Neuroligin, RASGRF2, GIPC, C18orf1, Kv10.1, Activin, CLOCK, SRGAP2(WRP), PLA2R1, KCNH7, GRB10, GBR1, Semaphorin …
33	regulation of synaptic vesicle exocytosis	177	1.3322e-12	2.02898e-10	1.3322e-12	2.02898e-10	16	Galpha(q)-specific amine GPCRs, Galpha(i)-specific amine GPCRs, DGK, Neuroligin, GIPC, Kv10.1, CACNA1D, Ionotropic glutamate receptor, ACM2, Synaptotagmin II, Synaptotagmin, Kainate receptor, RIMS3, WNT, CACNA1 L-type, CHRM
34	regulation of cell development	1579	1.54978e-12	2.29095e-10	1.54978e-12	2.29095e-10	43	Plexin A2, SSH1L, BIN1 (Amphiphysin II), Galpha(q)-specific amine GPCRs, CSPG4 (NG2), Galpha(i)-specific amine GPCRs, PBX, P/Q-type calcium channel alpha-1A subunit, Plexin B3, Ataxin-1, LZK(MAP3K13), DGK, DGK-gamma, Neuroligin, SVCT2, Krm, CLOCK, Semaphorin 6B, Phosphatase regulator (inhibitor), ProSAPiP1, CAMK1D, BMP receptor 2, Ionotropic glutamate receptor, PTCHD2, RAR, XYLT1, TCF8, Krm1, Tri…
35	multicellular organismal process	10586	1.83882e-12	2.64055e-10	1.83882e-12	2.64055e-10	135	Kir3.4, ITGA4, PAX5, PTHR1, Plexin A2, CLMP, Insulin receptor, Protocadherin 9, SSH1L, Creatine transporter 1 (SLC6A8), ORP-family, Activin B, KLF7, EPHA10, RXRA, BIN1 (Amphiphysin II), Syntrophin A, FAM73B, PDE2A, SPRED2, A20, GCNF, CREB5, Galpha(q)-specific amine GPCRs, eIF2C2 (Argonaute-2), G-protein alpha-11, CSPG4 (NG2), NF-AT5, Galpha(i)-specific amine GPCRs, VDR, APHC, SMVT, WNT9A, MSK1, P…
36	regulation of neuron differentiation	1102	3.87245e-12	5.38963e-10	3.87245e-12	5.38963e-10	35	Plexin A2, SSH1L, BIN1 (Amphiphysin II), CSPG4 (NG2), Galpha(i)-specific amine GPCRs, PBX, P/Q-type calcium channel alpha-1A subunit, Plexin B3, LZK(MAP3K13), DGK, DGK-gamma, Neuroligin, SVCT2, Krm, Semaphorin 6B, Phosphatase regulator (inhibitor), ProSAPiP1, CAMK1D, BMP receptor 2, Ionotropic glutamate receptor, PTCHD2, RAR, XYLT1, TCF8, Krm1, Trim67, Synaptotagmin II, Synaptotagmin, INPP5, WNT,…
37	regulation of postsynaptic membrane potential	190	3.96769e-12	5.38963e-10	3.96769e-12	5.38963e-10	16	GluR7, Galpha(q)-specific amine GPCRs, Galpha(i)-specific amine GPCRs, Ataxin-1, DGK, Neuroligin, GBR1, CACNA1C, GABA-A receptor gamma-2 subunit, Phosphatase regulator (inhibitor), Ionotropic glutamate receptor, JIP-2, Kainate receptor, Neurabin-1, CACNA1 L-type, CHRM
38	negative regulation of multicellular organismal process	1931	6.05304e-12	8.00595e-10	6.05304e-12	8.00595e-10	47	eIF2C1 (Argonaute-1), Activin B, KLF7, BIN1 (Amphiphysin II), SPRED2, A20, Galpha(q)-specific amine GPCRs, CSPG4 (NG2), Galpha(i)-specific amine GPCRs, WNT9A, MSK1, PBX, Neuroligin, Krm, C18orf1, Activin, Semaphorin 6B, OTUD7B, Galpha(q)-specific THRH&S GPCRs, Activin beta B, RAR-gamma/RXR-alpha, BMP receptor 2, PDE4, PTCHD2, RAR, XYLT1, KLF13, Krm1, Lnk, MSK1/2 (RPS6KA5/4), TFE3, Synaptotagmin, …
39	cellular response to organonitrogen compound	1199	9.10768e-12	1.17372e-09	9.10768e-12	1.17372e-09	36	ITGA4, Insulin receptor, SSH1L, Activin B, RXRA, PDE2A, Galpha(q)-specific amine GPCRs, G-protein alpha-11, Galpha(i)-specific amine GPCRs, VDR, P/Q-type calcium channel alpha-1A subunit, Paxillin, Activin, GRB10, CACNA1C, GABA-A receptor gamma-2 subunit, Phosphatase regulator (inhibitor), Galpha(q)-specific THRH&S GPCRs, Activin beta B, RAR-gamma/RXR-alpha, VDR/RXR-alpha, PDE4, CACNA1D, Ionotrop…
40	regulation of molecular function	4294	9.69487e-12	1.21816e-09	9.69487e-12	1.21816e-09	75	ITGA4, Plexin A2, Insulin receptor, ORP-family, MAGI-3, EPHA10, BIN1 (Amphiphysin II), SPRED2, A20, Galpha(q)-specific amine GPCRs, HMHA1, CSPG4 (NG2), Galpha(i)-specific amine GPCRs, VDR, WNT9A, MSK1, PBX, P/Q-type calcium channel alpha-1A subunit, Plexin B3, CSRNP2, LZK(MAP3K13), DGK, Paxillin, ADAR2, Neuroligin, ZNF462, RASGRF2, MLK2(MAP3K10), CLOCK, SRGAP2(WRP), PLA2R1, GBR1, CACNA1C, MMP-15,…
41	behavior	1081	1.07176e-11	1.31382e-09	1.07176e-11	1.31382e-09	34	PAX5, Insulin receptor, Galpha(q)-specific amine GPCRs, Galpha(i)-specific amine GPCRs, PBX, P/Q-type calcium channel alpha-1A subunit, Ataxin-1, DGK, ADAR2, Neuroligin, NLGN4Y, CACNA1C, GABA-A receptor gamma-2 subunit, Galpha(q)-specific THRH&S GPCRs, SOBP, Nav1.6, PDE4, CACNA1D, Ionotropic glutamate receptor, Exostosin-1, Myosin Va, JIP-2, SCN9A, Synaptotagmin, Kainate receptor, CACNA1E, PDE, G…
42	cell development	2630	2.35342e-11	2.81625e-09	2.35342e-11	2.81625e-09	55	ITGA4, PTHR1, Plexin A2, ORP-family, Activin B, KLF7, EPHA10, RXRA, BIN1 (Amphiphysin II), PDE2A, Galpha(q)-specific amine GPCRs, CSPG4 (NG2), Galpha(i)-specific amine GPCRs, MSK1, PBX, P/Q-type calcium channel alpha-1A subunit, Plexin B3, Kindlin-2, DGK, Paxillin, ADAR2, DGK-gamma, Neuroligin, Activin, GRB10, Semaphorin 6B, Phosphatase regulator (inhibitor), ARID4B, Activin beta B, RAR-gamma/RXR…
43	regulation of transport	2801	2.64803e-11	3.09512e-09	2.64803e-11	3.09512e-09	57	Kir3.4, Insulin receptor, ORP-family, Activin B, KLF7, BIN1 (Amphiphysin II), Syntrophin A, Galpha(q)-specific amine GPCRs, Galpha(i)-specific amine GPCRs, VDR, P/Q-type calcium channel alpha-1A subunit, PER1, KCNH5, DGK, Neuroligin, RASGRF2, GIPC, Kv10.1, Activin, CLOCK, PLA2R1, KCNH7, GRB10, GBR1, CACNA1C, Phosphatase regulator (inhibitor), CAMK1D, Galpha(q)-specific THRH&S GPCRs, Activin beta …
44	neuron differentiation	1661	3.16976e-11	3.62073e-09	3.16976e-11	3.62073e-09	42	ITGA4, PAX5, Plexin A2, KLF7, EPHA10, RXRA, CSPG4 (NG2), Galpha(i)-specific amine GPCRs, WNT9A, MSK1, PBX, P/Q-type calcium channel alpha-1A subunit, Plexin B3, DGK, ADAR2, DGK-gamma, Neuroligin, Activin, GRB10, Semaphorin 6B, Phosphatase regulator (inhibitor), RAR-gamma/RXR-alpha, VDR/RXR-alpha, Ionotropic glutamate receptor, Exostosin-1, MSK1/2 (RPS6KA5/4), JIP-2, KIAA1853, RXR, LIFR, DNMT3A, M…
45	negative regulation of cellular process	6985	6.95594e-11	7.76901e-09	6.95594e-11	7.76901e-09	100	GluR7, PAX5, PTHR1, Plexin A2, Insulin receptor, eIF2C1 (Argonaute-1), SSH1L, ORP-family, Activin B, KLF7, RXRA, BIN1 (Amphiphysin II), Syntrophin A, PDE2A, SPRED2, A20, GCNF, Galpha(q)-specific amine GPCRs, eIF2C2 (Argonaute-2), CSPG4 (NG2), Galpha(i)-specific amine GPCRs, VDR, WNT9A, MSK1, PBX, P/Q-type calcium channel alpha-1A subunit, Plexin B3, CSRNP2, Ataxin-1, PER1, DGK, ADAR2, DGK-gamma, …
46	regulation of synaptic vesicle cycle	232	8.12243e-11	8.87464e-09	8.12243e-11	8.87464e-09	16	Galpha(q)-specific amine GPCRs, Galpha(i)-specific amine GPCRs, DGK, Neuroligin, GIPC, Kv10.1, CACNA1D, Ionotropic glutamate receptor, ACM2, Synaptotagmin II, Synaptotagmin, Kainate receptor, RIMS3, WNT, CACNA1 L-type, CHRM
47	cellular response to nitrogen compound	1298	8.43883e-11	9.02416e-09	8.43883e-11	9.02416e-09	36	ITGA4, Insulin receptor, SSH1L, Activin B, RXRA, PDE2A, Galpha(q)-specific amine GPCRs, G-protein alpha-11, Galpha(i)-specific amine GPCRs, VDR, P/Q-type calcium channel alpha-1A subunit, Paxillin, Activin, GRB10, CACNA1C, GABA-A receptor gamma-2 subunit, Phosphatase regulator (inhibitor), Galpha(q)-specific THRH&S GPCRs, Activin beta B, RAR-gamma/RXR-alpha, VDR/RXR-alpha, PDE4, CACNA1D, Ionotrop…
48	negative regulation of biological process	7670	9.30417e-11	9.74224e-09	9.30417e-11	9.74224e-09	106	GluR7, PAX5, PTHR1, Plexin A2, Insulin receptor, eIF2C1 (Argonaute-1), SSH1L, ORP-family, Activin B, KLF7, RXRA, BIN1 (Amphiphysin II), Syntrophin A, PDE2A, SPRED2, A20, GCNF, Galpha(q)-specific amine GPCRs, eIF2C2 (Argonaute-2), CSPG4 (NG2), Galpha(i)-specific amine GPCRs, VDR, WNT9A, MSK1, PBX, P/Q-type calcium channel alpha-1A subunit, Plexin B3, CSRNP2, Ataxin-1, PER1, DGK, ADAR2, DGK-gamma, …
49	positive regulation of cellular process	7836	1.48169e-10	1.51979e-08	1.48169e-10	1.51979e-08	107	ITGA4, PAX5, PTHR1, Plexin A2, Insulin receptor, eIF2C1 (Argonaute-1), SSH1L, ORP-family, Activin B, HIVEP2, MAGI-3, KLF7, EPHA10, Lrrc24, RXRA, BIN1 (Amphiphysin II), SPRED2, A20, GCNF, CREB5, Galpha(q)-specific amine GPCRs, eIF2C2 (Argonaute-2), CSPG4 (NG2), NF-AT5, Galpha(i)-specific amine GPCRs, VDR, APHC, WNT9A, MSK1, PBX, Plexin B3, CSRNP2, Ataxin-1, PER1, TRH receptor, LZK(MAP3K13), DGK, P…
50	negative regulation of cell communication	2058	1.87097e-10	1.87184e-08	1.87097e-10	1.87184e-08	46	GluR7, Activin B, KLF7, PDE2A, SPRED2, A20, Galpha(q)-specific amine GPCRs, Galpha(i)-specific amine GPCRs, Ataxin-1, PER1, DGK, DGK-gamma, Neuroligin, Krm, C18orf1, Activin, CLOCK, GRB10, GBR1, OTUD7B, Phosphatase regulator (inhibitor), Galpha(q)-specific THRH&S GPCRs, Activin beta B, PDE4, Tensin 2, Ionotropic glutamate receptor, APCL, Krm1, Trim67, Lnk, JIP-2, ANKRD25, Synaptotagmin, Kainate r…

## Sheet: Table S3.4-mRNA-GO-TBBPA-DBPE
Enrichment analysis report
Enrichment by GO Processes					TBBPA_DBPE-Con_log2(1.5)all_FRC_RNA
#	Processes	Total	pValue	Min FDR	p-value	FDR	In Data	Network Objects from Active Data
1	system development	6754	5.00338e-15	2.2165e-11	5.00338e-15	2.2165e-11	83	Creatine transporter 1 (SLC6A8), BIN1 (Amphiphysin II), Delta-sarcoglycan, FAM73B, PDE2A, PIP5KII, A20, CREB5, Ephrin-A receptors, G-protein alpha-11, CSPG4 (NG2), VDR, APHC, MSK1, PBX, Plexin B3, LZK(MAP3K13), DGK, DGK-gamma, Neuroligin, SVCT2, NLGN4Y, PSMA6, Krm, Matrilin-1, GRB10, Semaphorin 6B, ECE2, CACNA1C, PI52A, GABA-A receptor gamma-2 subunit, SFRP, Ephrin-A receptor 5, Phosphatase regul…
2	nervous system development	3688	1.18378e-14	2.62206e-11	1.18378e-14	2.62206e-11	59	BIN1 (Amphiphysin II), Ephrin-A receptors, CSPG4 (NG2), APHC, MSK1, PBX, Plexin B3, LZK(MAP3K13), DGK, DGK-gamma, Neuroligin, SVCT2, NLGN4Y, Krm, GRB10, Semaphorin 6B, ECE2, GABA-A receptor gamma-2 subunit, SFRP, Ephrin-A receptor 5, Phosphatase regulator (inhibitor), PEA3, CAMK1D, WNT3A, NAV1, PPAP2, SFRP2, SLC6A17, RAR, TCF8, Exostosin-1, Krm1, Trim67, MSK1/2 (RPS6KA5/4), KCC2, KIAA1853, LIFR, …
3	neurogenesis	2636	2.19741e-14	3.24485e-11	2.19741e-14	3.24485e-11	49	BIN1 (Amphiphysin II), Ephrin-A receptors, CSPG4 (NG2), MSK1, PBX, Plexin B3, LZK(MAP3K13), DGK, DGK-gamma, Neuroligin, SVCT2, Krm, GRB10, Semaphorin 6B, SFRP, Ephrin-A receptor 5, Phosphatase regulator (inhibitor), PEA3, CAMK1D, WNT3A, NAV1, PPAP2, SFRP2, RAR, TCF8, Exostosin-1, Krm1, Trim67, MSK1/2 (RPS6KA5/4), KCC2, KIAA1853, LIFR, Synaptotagmin II, DNMT3A, MAP6, MA2A1, Synaptotagmin, MKP-5, P…
4	generation of neurons	2476	4.27346e-14	4.73286e-11	4.27346e-14	4.73286e-11	47	BIN1 (Amphiphysin II), Ephrin-A receptors, CSPG4 (NG2), MSK1, PBX, Plexin B3, LZK(MAP3K13), DGK, DGK-gamma, Neuroligin, SVCT2, Krm, GRB10, Semaphorin 6B, SFRP, Ephrin-A receptor 5, Phosphatase regulator (inhibitor), PEA3, CAMK1D, WNT3A, NAV1, SFRP2, RAR, TCF8, Exostosin-1, Krm1, Trim67, MSK1/2 (RPS6KA5/4), KCC2, KIAA1853, LIFR, Synaptotagmin II, DNMT3A, MAP6, MA2A1, Synaptotagmin, MKP-5, PDE, G-p…
5	multicellular organism development	7593	1.44756e-13	1.28254e-10	1.44756e-13	1.28254e-10	86	Creatine transporter 1 (SLC6A8), BIN1 (Amphiphysin II), Delta-sarcoglycan, FAM73B, PDE2A, PIP5KII, MAFG, A20, GCNF, CREB5, Ephrin-A receptors, eIF2C2 (Argonaute-2), G-protein alpha-11, CSPG4 (NG2), VDR, APHC, MSK1, PBX, Plexin B3, LZK(MAP3K13), DGK, DGK-gamma, Neuroligin, SVCT2, NLGN4Y, PSMA6, Krm, Matrilin-1, GRB10, Semaphorin 6B, ECE2, CACNA1C, PI52A, GABA-A receptor gamma-2 subunit, SFRP, Ephr…
6	anatomical structure development	8098	2.26727e-12	1.674e-09	2.26727e-12	1.674e-09	87	Creatine transporter 1 (SLC6A8), ORP-family, BIN1 (Amphiphysin II), Delta-sarcoglycan, FAM73B, PDE2A, PIP5KII, MAFG, A20, GCNF, CREB5, Ephrin-A receptors, eIF2C2 (Argonaute-2), G-protein alpha-11, CSPG4 (NG2), VDR, APHC, MSK1, PBX, Plexin B3, LZK(MAP3K13), DGK, DGK-gamma, Neuroligin, SVCT2, NLGN4Y, PSMA6, Krm, Matrilin-1, GRB10, Semaphorin 6B, ECE2, CACNA1C, PI52A, GABA-A receptor gamma-2 subunit…
7	regulation of neuron differentiation	1102	4.63401e-12	2.93267e-09	4.63401e-12	2.93267e-09	29	BIN1 (Amphiphysin II), Ephrin-A receptors, CSPG4 (NG2), PBX, Plexin B3, LZK(MAP3K13), DGK, DGK-gamma, Neuroligin, SVCT2, Krm, Semaphorin 6B, SFRP, Phosphatase regulator (inhibitor), CAMK1D, WNT3A, SFRP2, RAR, TCF8, Krm1, Trim67, Synaptotagmin II, MAP6, Synaptotagmin, WNT, PBX1, ATF/CREB, Neurabin-1, SPOCK
8	developmental process	8706	5.76381e-12	3.19171e-09	5.76381e-12	3.19171e-09	90	Creatine transporter 1 (SLC6A8), ORP-family, BIN1 (Amphiphysin II), Delta-sarcoglycan, FAM73B, PDE2A, PIP5KII, MAFG, A20, GCNF, CREB5, Ephrin-A receptors, eIF2C2 (Argonaute-2), G-protein alpha-11, CSPG4 (NG2), VDR, Elk-4, APHC, MSK1, PBX, Plexin B3, LZK(MAP3K13), DGK, DGK-gamma, Neuroligin, SVCT2, NLGN4Y, PSMA6, Krm, Matrilin-1, CLOCK, GRB10, GBR1, Semaphorin 6B, ECE2, CACNA1C, PI52A, GABA-A rece…
9	cell differentiation	5601	8.46252e-12	4.16544e-09	8.46252e-12	4.16544e-09	69	ORP-family, BIN1 (Amphiphysin II), Delta-sarcoglycan, PDE2A, PIP5KII, A20, GCNF, CREB5, Ephrin-A receptors, eIF2C2 (Argonaute-2), CSPG4 (NG2), VDR, Elk-4, MSK1, PBX, Plexin B3, LZK(MAP3K13), DGK, DGK-gamma, Neuroligin, SVCT2, Krm, Matrilin-1, GRB10, GBR1, Semaphorin 6B, ECE2, PI52A, SFRP, Ephrin-A receptor 5, Phosphatase regulator (inhibitor), PEA3, CAMK1D, WNT3A, NAV1, PPAP2, PDE4, SFRP2, RAR, T…
10	regulation of cell development	1579	1.24524e-11	5.5164e-09	1.24524e-11	5.5164e-09	34	BIN1 (Amphiphysin II), Ephrin-A receptors, CSPG4 (NG2), PBX, Plexin B3, LZK(MAP3K13), DGK, DGK-gamma, Neuroligin, SVCT2, Krm, CLOCK, Semaphorin 6B, SFRP, Phosphatase regulator (inhibitor), CAMK1D, WNT3A, SFRP2, RAR, TCF8, Krm1, Trim67, Synaptotagmin II, MAP6, MA2A1, Synaptotagmin, MKP-5, PDE, WNT, DOCK5, PBX1, ATF/CREB, Neurabin-1, SPOCK
11	cellular developmental process	5668	1.50606e-11	6.06533e-09	1.50606e-11	6.06533e-09	69	ORP-family, BIN1 (Amphiphysin II), Delta-sarcoglycan, PDE2A, PIP5KII, A20, GCNF, CREB5, Ephrin-A receptors, eIF2C2 (Argonaute-2), CSPG4 (NG2), VDR, Elk-4, MSK1, PBX, Plexin B3, LZK(MAP3K13), DGK, DGK-gamma, Neuroligin, SVCT2, Krm, Matrilin-1, GRB10, GBR1, Semaphorin 6B, ECE2, PI52A, SFRP, Ephrin-A receptor 5, Phosphatase regulator (inhibitor), PEA3, CAMK1D, WNT3A, NAV1, PPAP2, PDE4, SFRP2, RAR, T…
12	regulation of nervous system development	1510	1.80554e-11	6.24698e-09	1.80554e-11	6.24698e-09	33	BIN1 (Amphiphysin II), Ephrin-A receptors, CSPG4 (NG2), PBX, Plexin B3, LZK(MAP3K13), DGK, DGK-gamma, Neuroligin, SVCT2, Krm, Semaphorin 6B, SFRP, Phosphatase regulator (inhibitor), CAMK1D, Galpha(q)-specific THRH&S GPCRs, WNT3A, SFRP2, RAR, TCF8, Krm1, Trim67, Synaptotagmin II, MAP6, MA2A1, Synaptotagmin, MKP-5, WNT, PBX1, ATF/CREB, Neurabin-1, RARgamma, SPOCK
13	regulation of multicellular organismal process	4748	1.8332e-11	6.24698e-09	1.8332e-11	6.24698e-09	62	eIF2C1 (Argonaute-1), BIN1 (Amphiphysin II), MAFG, A20, Ephrin-A receptors, eIF2C2 (Argonaute-2), CSPG4 (NG2), VDR, MSK1, PBX, Plexin B3, LZK(MAP3K13), DGK, DGK-gamma, Neuroligin, SVCT2, PSMA6, Krm, Matrilin-1, KIBRA, CLOCK, GRB10, Semaphorin 6B, CACNA1C, SFRP, Phosphatase regulator (inhibitor), PEA3, SOCS5, CAMK1D, Galpha(q)-specific THRH&S GPCRs, WNT3A, PPAP2, PDE4, CACNA1D, PUM2, SFRP2, RAR, T…
14	regulation of neurogenesis	1343	2.13663e-11	6.76092e-09	2.13663e-11	6.76092e-09	31	BIN1 (Amphiphysin II), Ephrin-A receptors, CSPG4 (NG2), PBX, Plexin B3, LZK(MAP3K13), DGK, DGK-gamma, Neuroligin, SVCT2, Krm, Semaphorin 6B, SFRP, Phosphatase regulator (inhibitor), CAMK1D, WNT3A, SFRP2, RAR, TCF8, Krm1, Trim67, Synaptotagmin II, MAP6, MA2A1, Synaptotagmin, MKP-5, WNT, PBX1, ATF/CREB, Neurabin-1, SPOCK
15	regulation of cell differentiation	2891	4.44819e-11	1.3137e-08	4.44819e-11	1.3137e-08	46	eIF2C1 (Argonaute-1), BIN1 (Amphiphysin II), MAFG, Ephrin-A receptors, G-protein alpha-11, CSPG4 (NG2), VDR, PBX, Plexin B3, LZK(MAP3K13), DGK, DGK-gamma, Neuroligin, SVCT2, PSMA6, Krm, CLOCK, Semaphorin 6B, SFRP, Phosphatase regulator (inhibitor), PEA3, SOCS5, CAMK1D, WNT3A, SFRP2, RAR, TCF8, Krm1, Trim67, SGPP1, Synaptotagmin II, TFE3, MAP6, MA2A1, Synaptotagmin, MKP-5, PDE, G-protein alpha-q/1…
16	cell-cell signaling	1697	8.70916e-11	2.41135e-08	8.70916e-11	2.41135e-08	34	eIF2C1 (Argonaute-1), eIF2C2 (Argonaute-2), G-protein alpha-11, DGK, Neuroligin, NLGN4Y, PSMA6, Krm, GBR1, ECE2, CACNA1C, GABA-A receptor gamma-2 subunit, SFRP, Phosphatase regulator (inhibitor), Galpha(q)-specific THRH&S GPCRs, WNT3A, PPAP2, CACNA1D, SFRP2, RAR, Dystrobrevin beta, Exostosin-1, Krm1, KCC2, Synaptotagmin II, Synaptotagmin, KCNQ2, PDE, G-protein alpha-q/11, WNT, NUDT3, Neurabin-1, …
17	regulation of multicellular organismal development	3202	1.13673e-10	2.96219e-08	1.13673e-10	2.96219e-08	48	eIF2C1 (Argonaute-1), BIN1 (Amphiphysin II), MAFG, A20, Ephrin-A receptors, eIF2C2 (Argonaute-2), CSPG4 (NG2), VDR, PBX, Plexin B3, LZK(MAP3K13), DGK, DGK-gamma, Neuroligin, SVCT2, PSMA6, Krm, Matrilin-1, CLOCK, Semaphorin 6B, SFRP, Phosphatase regulator (inhibitor), PEA3, SOCS5, CAMK1D, Galpha(q)-specific THRH&S GPCRs, WNT3A, SFRP2, RAR, TCF8, Krm1, Trim67, SGPP1, Synaptotagmin II, TFE3, MAP6, M…
18	regulation of neuron projection development	866	1.46747e-10	3.6116e-08	1.46747e-10	3.6116e-08	24	Ephrin-A receptors, CSPG4 (NG2), Plexin B3, LZK(MAP3K13), DGK, DGK-gamma, Neuroligin, SVCT2, Krm, Semaphorin 6B, SFRP, Phosphatase regulator (inhibitor), CAMK1D, WNT3A, SFRP2, Krm1, Trim67, Synaptotagmin II, MAP6, Synaptotagmin, WNT, ATF/CREB, Neurabin-1, SPOCK
19	regulation of developmental process	3978	1.94325e-10	4.53083e-08	1.94325e-10	4.53083e-08	54	eIF2C1 (Argonaute-1), BIN1 (Amphiphysin II), MAFG, A20, Ephrin-A receptors, eIF2C2 (Argonaute-2), G-protein alpha-11, CSPG4 (NG2), VDR, PBX, Plexin B3, LZK(MAP3K13), DGK, DGK-gamma, Neuroligin, SVCT2, PSMA6, Krm, Matrilin-1, KIBRA, CLOCK, Semaphorin 6B, CACNA1C, SFRP, Phosphatase regulator (inhibitor), PEA3, SOCS5, CAMK1D, Galpha(q)-specific THRH&S GPCRs, WNT3A, SFRP2, RAR, TCF8, Krm1, Trim67, SG…
20	regulation of molecular function	4294	3.49376e-10	7.73868e-08	3.49376e-10	7.73868e-08	56	RGS5, ORP-family, BIN1 (Amphiphysin II), A20, Ephrin-A receptors, CSPG4 (NG2), VDR, MSK1, PBX, Plexin B3, CSRNP2, LZK(MAP3K13), DGK, Neuroligin, PSMA6, RASGRF2, CLOCK, SRGAP2(WRP), GBR1, CACNA1C, SFRP, Ephrin-A receptor 5, Phosphatase regulator (inhibitor), SOCS5, CAMK1D, WNT3A, PPAP2, PDE4, CACNA1D, TBC1D9B, SFRP2, KIAA1244, RAR, MSK1/2 (RPS6KA5/4), FOXN3, FISH, ALDOB, Sgsm1, MKP-5, PDE, G-prote…
21	regulation of DNA-binding transcription factor activity	694	4.89835e-10	1.03332e-07	4.89835e-10	1.03332e-07	21	A20, Ephrin-A receptors, MSK1, PBX, LZK(MAP3K13), PSMA6, CLOCK, SFRP, Ephrin-A receptor 5, CAMK1D, WNT3A, PPAP2, CACNA1D, MSK1/2 (RPS6KA5/4), FOXN3, WNT, PBX1, ATF/CREB, HIPK2, Itch, CACNA1 L-type
22	neuron differentiation	1661	9.38976e-10	1.89076e-07	9.38976e-10	1.89076e-07	32	Ephrin-A receptors, CSPG4 (NG2), MSK1, PBX, Plexin B3, DGK, DGK-gamma, Neuroligin, GRB10, Semaphorin 6B, SFRP, Ephrin-A receptor 5, Phosphatase regulator (inhibitor), PEA3, WNT3A, Exostosin-1, MSK1/2 (RPS6KA5/4), KCC2, KIAA1853, LIFR, DNMT3A, MAP6, PDE, G-protein alpha-q/11, WNT, PBX1, ATF/CREB, Neurabin-1, CXXC6, HIPK2, CACNA1 L-type, SPOCK
23	positive regulation of CREB transcription factor activity	36	1.26138e-09	2.42952e-07	1.26138e-09	2.42952e-07	7	Ephrin-A receptors, MSK1, Ephrin-A receptor 5, CAMK1D, CACNA1D, MSK1/2 (RPS6KA5/4), CACNA1 L-type
24	cell development	2630	1.38016e-09	2.54755e-07	1.38016e-09	2.54755e-07	41	ORP-family, BIN1 (Amphiphysin II), Delta-sarcoglycan, PDE2A, PIP5KII, Ephrin-A receptors, CSPG4 (NG2), MSK1, PBX, Plexin B3, DGK, DGK-gamma, Neuroligin, Matrilin-1, GRB10, Semaphorin 6B, PI52A, SFRP, Ephrin-A receptor 5, Phosphatase regulator (inhibitor), PEA3, WNT3A, PDE4, SFRP2, RAR, Exostosin-1, MSK1/2 (RPS6KA5/4), KCC2, KIAA1853, LIFR, MAP6, PDE, G-protein alpha-q/11, WNT, PDE4D, PBX1, ATF/CR…
25	skeletal system development	741	1.58124e-09	2.80196e-07	1.58124e-09	2.80196e-07	21	FAM73B, PIP5KII, Ephrin-A receptors, G-protein alpha-11, VDR, PBX, Matrilin-1, PI52A, SFRP, SFRP2, RAR, TCF8, Exostosin-1, FOXN3, Neurocan, G-protein alpha-q/11, WNT, PBX1, ATF/CREB, RARgamma, CACNA1 L-type
26	negative regulation of multicellular organismal process	1931	2.54323e-09	4.33328e-07	2.54323e-09	4.33328e-07	34	eIF2C1 (Argonaute-1), BIN1 (Amphiphysin II), A20, Ephrin-A receptors, CSPG4 (NG2), MSK1, PBX, Neuroligin, Krm, KIBRA, Semaphorin 6B, SFRP, PEA3, SOCS5, Galpha(q)-specific THRH&S GPCRs, WNT3A, PDE4, SFRP2, RAR, Krm1, MSK1/2 (RPS6KA5/4), TFE3, Synaptotagmin, MKP-5, PDE, DOCK4, WNT, PDE4D, DOCK5, PBX1, ATF/CREB, RARgamma, Itch, SPOCK
27	neuron development	1359	3.00426e-09	4.92921e-07	3.00426e-09	4.92921e-07	28	Ephrin-A receptors, CSPG4 (NG2), MSK1, PBX, Plexin B3, DGK, DGK-gamma, Neuroligin, GRB10, Semaphorin 6B, Ephrin-A receptor 5, Phosphatase regulator (inhibitor), PEA3, WNT3A, Exostosin-1, MSK1/2 (RPS6KA5/4), KCC2, KIAA1853, LIFR, MAP6, PDE, G-protein alpha-q/11, WNT, PBX1, ATF/CREB, Neurabin-1, CXXC6, CACNA1 L-type
28	positive regulation of molecular function	2613	3.97859e-09	6.29469e-07	3.97859e-09	6.29469e-07	40	RGS5, ORP-family, BIN1 (Amphiphysin II), Ephrin-A receptors, CSPG4 (NG2), VDR, MSK1, LZK(MAP3K13), DGK, Neuroligin, PSMA6, CLOCK, SRGAP2(WRP), CACNA1C, SFRP, Ephrin-A receptor 5, Phosphatase regulator (inhibitor), CAMK1D, WNT3A, PPAP2, CACNA1D, TBC1D9B, SFRP2, RAR, MSK1/2 (RPS6KA5/4), FISH, ALDOB, Sgsm1, PDE, G-protein alpha-q/11, DOCK4, CENTG3, WNT, MMP-24, DOCK5, ATF/CREB, Neurabin-1, HIPK2, RA…
29	regulation of plasma membrane bounded cell projection organization	1144	7.55736e-09	1.15445e-06	7.55736e-09	1.15445e-06	25	Ephrin-A receptors, CSPG4 (NG2), Plexin B3, LZK(MAP3K13), DGK, DGK-gamma, Neuroligin, SVCT2, Krm, Semaphorin 6B, SFRP, Phosphatase regulator (inhibitor), CAMK1D, WNT3A, TBC1D9B, SFRP2, Krm1, Trim67, Synaptotagmin II, MAP6, Synaptotagmin, WNT, ATF/CREB, Neurabin-1, SPOCK
30	regulation of cell projection organization	1155	9.13832e-09	1.34942e-06	9.13832e-09	1.34942e-06	25	Ephrin-A receptors, CSPG4 (NG2), Plexin B3, LZK(MAP3K13), DGK, DGK-gamma, Neuroligin, SVCT2, Krm, Semaphorin 6B, SFRP, Phosphatase regulator (inhibitor), CAMK1D, WNT3A, TBC1D9B, SFRP2, Krm1, Trim67, Synaptotagmin II, MAP6, Synaptotagmin, WNT, ATF/CREB, Neurabin-1, SPOCK
31	appendage development	287	1.1679e-08	1.61681e-06	1.1679e-08	1.61681e-06	13	PBX, Krm, CACNA1C, SFRP, SFRP2, RAR, Exostosin-1, Krm1, G-protein alpha-q/11, WNT, PBX1, RARgamma, CACNA1 L-type
32	limb development	287	1.1679e-08	1.61681e-06	1.1679e-08	1.61681e-06	13	PBX, Krm, CACNA1C, SFRP, SFRP2, RAR, Exostosin-1, Krm1, G-protein alpha-q/11, WNT, PBX1, RARgamma, CACNA1 L-type
33	synaptic signaling	758	1.334e-08	1.79079e-06	1.334e-08	1.79079e-06	20	G-protein alpha-11, DGK, Neuroligin, NLGN4Y, CACNA1C, GABA-A receptor gamma-2 subunit, Phosphatase regulator (inhibitor), WNT3A, CACNA1D, Dystrobrevin beta, Exostosin-1, KCC2, Synaptotagmin II, Synaptotagmin, KCNQ2, PDE, G-protein alpha-q/11, WNT, Neurabin-1, CACNA1 L-type
34	regulation of dermatome development	6	1.53043e-08	1.99407e-06	1.53043e-08	1.99407e-06	4	SFRP, WNT3A, SFRP2, WNT
35	multicellular organismal process	10586	3.31036e-08	4.18997e-06	3.31036e-08	4.18997e-06	93	Creatine transporter 1 (SLC6A8), ORP-family, BIN1 (Amphiphysin II), Delta-sarcoglycan, FAM73B, PDE2A, PIP5KII, MAFG, A20, GCNF, CREB5, Ephrin-A receptors, eIF2C2 (Argonaute-2), G-protein alpha-11, CSPG4 (NG2), VDR, APHC, SMVT, MSK1, PBX, Plexin B3, LZK(MAP3K13), DGK, DGK-gamma, Neuroligin, SVCT2, NLGN4Y, PSMA6, Krm, Matrilin-1, CLOCK, GRB10, GBR1, Semaphorin 6B, ECE2, CACNA1C, PI52A, GABA-A recep…
36	positive regulation of DNA-binding transcription factor activity	437	3.42794e-08	4.21827e-06	3.42794e-08	4.21827e-06	15	Ephrin-A receptors, MSK1, LZK(MAP3K13), PSMA6, CLOCK, Ephrin-A receptor 5, CAMK1D, WNT3A, PPAP2, CACNA1D, MSK1/2 (RPS6KA5/4), WNT, ATF/CREB, HIPK2, CACNA1 L-type
37	cell surface receptor signaling pathway involved in cell-cell signaling	649	3.57175e-08	4.27645e-06	3.57175e-08	4.27645e-06	18	eIF2C1 (Argonaute-1), eIF2C2 (Argonaute-2), DGK, Neuroligin, PSMA6, Krm, SFRP, Phosphatase regulator (inhibitor), WNT3A, PPAP2, SFRP2, RAR, Exostosin-1, Krm1, PDE, WNT, Neurabin-1, RARgamma
38	negative regulation of cellular process	6985	7.47764e-08	8.71735e-06	7.47764e-08	8.71735e-06	70	RGS5, eIF2C1 (Argonaute-1), ORP-family, BIN1 (Amphiphysin II), PDE2A, A20, GCNF, Ephrin-A receptors, eIF2C2 (Argonaute-2), CSPG4 (NG2), VDR, Elk-4, MSK1, PBX, Plexin B3, CSRNP2, DGK, DGK-gamma, Neuroligin, SVCT2, Fe65-like2, PSMA6, Krm, KIBRA, CLOCK, SRGAP2(WRP), GRB10, GBR1, Semaphorin 6B, SFRP, Ephrin-A receptor 5, Phosphatase regulator (inhibitor), PEA3, SOCS5, CAMK1D, P52rIPK, Galpha(q)-speci…
39	negative regulation of phosphate metabolic process	860	1.05305e-07	1.18827e-05	1.05305e-07	1.18827e-05	20	PDE2A, A20, Ephrin-A receptors, CSRNP2, DGK, GRB10, SFRP, Phosphatase regulator (inhibitor), SOCS5, PPAP2, PDE4, SFRP2, KIAA1244, MKP-5, PDE, G-protein alpha-q/11, FAM130A2, PDE4D, ATF/CREB, Itch
40	negative regulation of phosphorus metabolic process	861	1.07293e-07	1.18827e-05	1.07293e-07	1.18827e-05	20	PDE2A, A20, Ephrin-A receptors, CSRNP2, DGK, GRB10, SFRP, Phosphatase regulator (inhibitor), SOCS5, PPAP2, PDE4, SFRP2, KIAA1244, MKP-5, PDE, G-protein alpha-q/11, FAM130A2, PDE4D, ATF/CREB, Itch
41	negative regulation of biological process	7670	1.13412e-07	1.2254e-05	1.13412e-07	1.2254e-05	74	RGS5, eIF2C1 (Argonaute-1), ORP-family, BIN1 (Amphiphysin II), PDE2A, A20, GCNF, Ephrin-A receptors, eIF2C2 (Argonaute-2), CSPG4 (NG2), VDR, Elk-4, MSK1, PBX, Plexin B3, CSRNP2, DGK, DGK-gamma, Neuroligin, SVCT2, Fe65-like2, PSMA6, Krm, KIBRA, CLOCK, SRGAP2(WRP), GRB10, GBR1, Semaphorin 6B, SFRP, Ephrin-A receptor 5, Phosphatase regulator (inhibitor), PEA3, SOCS5, CAMK1D, P52rIPK, Galpha(q)-speci…
42	positive regulation of cellular process	7836	1.19767e-07	1.26326e-05	1.19767e-07	1.26326e-05	75	eIF2C1 (Argonaute-1), ORP-family, BIN1 (Amphiphysin II), PIP5KII, MAFG, A20, GCNF, CREB5, Ephrin-A receptors, eIF2C2 (Argonaute-2), CSPG4 (NG2), VDR, Elk-4, APHC, MSK1, PBX, Plexin B3, CSRNP2, TRH receptor, LZK(MAP3K13), DGK, Neuroligin, SVCT2, PSMA6, RASGRF2, KIBRA, CLOCK, GRB10, GBR1, Semaphorin 6B, CACNA1C, PI52A, SFRP, Ephrin-A receptor 5, Phosphatase regulator (inhibitor), PEA3, SOCS5, CAMK1…
43	modulation of chemical synaptic transmission	786	1.24841e-07	1.27713e-05	1.24841e-07	1.27713e-05	19	Ephrin-A receptors, DGK, Neuroligin, NLGN4Y, RASGRF2, GBR1, Phosphatase regulator (inhibitor), Galpha(q)-specific THRH&S GPCRs, WNT3A, PDE4, CACNA1D, RAR, Synaptotagmin II, Synaptotagmin, PDE, WNT, ATF/CREB, Neurabin-1, CACNA1 L-type
44	regulation of mesodermal cell fate specification	9	1.26848e-07	1.27713e-05	1.26848e-07	1.27713e-05	4	SFRP, WNT3A, SFRP2, WNT
45	regulation of trans-synaptic signaling	788	1.29835e-07	1.27815e-05	1.29835e-07	1.27815e-05	19	Ephrin-A receptors, DGK, Neuroligin, NLGN4Y, RASGRF2, GBR1, Phosphatase regulator (inhibitor), Galpha(q)-specific THRH&S GPCRs, WNT3A, PDE4, CACNA1D, RAR, Synaptotagmin II, Synaptotagmin, PDE, WNT, ATF/CREB, Neurabin-1, CACNA1 L-type
46	negative regulation of cell communication	2058	1.5263e-07	1.46989e-05	1.5263e-07	1.46989e-05	32	RGS5, PDE2A, A20, Ephrin-A receptors, DGK, DGK-gamma, Neuroligin, PSMA6, Krm, KIBRA, CLOCK, GRB10, GBR1, SFRP, Phosphatase regulator (inhibitor), SOCS5, Galpha(q)-specific THRH&S GPCRs, PDE4, SFRP2, Krm1, Trim67, ANKRD25, Synaptotagmin, MKP-5, PDE, WNT, PDE4D, ATF/CREB, Neurabin-1, HIPK2, Itch, RASA2
47	negative regulation of signaling	2061	1.57764e-07	1.48398e-05	1.57764e-07	1.48398e-05	32	RGS5, PDE2A, A20, Ephrin-A receptors, DGK, DGK-gamma, Neuroligin, PSMA6, Krm, KIBRA, CLOCK, GRB10, GBR1, SFRP, Phosphatase regulator (inhibitor), SOCS5, Galpha(q)-specific THRH&S GPCRs, PDE4, SFRP2, Krm1, Trim67, ANKRD25, Synaptotagmin, MKP-5, PDE, WNT, PDE4D, ATF/CREB, Neurabin-1, HIPK2, Itch, RASA2
48	appendage morphogenesis	243	1.64142e-07	1.48398e-05	1.64142e-07	1.48398e-05	11	PBX, CACNA1C, SFRP, SFRP2, RAR, Exostosin-1, G-protein alpha-q/11, WNT, PBX1, RARgamma, CACNA1 L-type
49	limb morphogenesis	243	1.64142e-07	1.48398e-05	1.64142e-07	1.48398e-05	11	PBX, CACNA1C, SFRP, SFRP2, RAR, Exostosin-1, G-protein alpha-q/11, WNT, PBX1, RARgamma, CACNA1 L-type
50	regulation of developmental growth	567	1.71862e-07	1.5227e-05	1.71862e-07	1.5227e-05	16	Ephrin-A receptors, LZK(MAP3K13), SVCT2, KIBRA, Semaphorin 6B, CACNA1C, SFRP, Galpha(q)-specific THRH&S GPCRs, WNT3A, SFRP2, Synaptotagmin II, Synaptotagmin, MKP-5, WNT, ATF/CREB, CACNA1 L-type

## Sheet: Table S3.5-mRNA-GO-TCEP
Enrichment analysis report
Enrichment by GO Processes					TCEP-Con_log2(1.5)all_FRC_RNA
#	Processes	Total	pValue	Min FDR	p-value	FDR	In Data	Network Objects from Active Data
1	nervous system development	3688	2.55292e-15	1.11511e-11	2.55292e-15	1.11511e-11	76	Plexin A2, KLF7, EPHA10, RXRA, BIN1 (Amphiphysin II), Periaxin, Polycystin 2, Transgelin-3, CSPG4 (NG2), APHC, MSK1, PBX, P/Q-type calcium channel alpha-1A subunit, Plexin B3, Ataxin-1, LZK(MAP3K13), DGK, ADAR2, DGK-gamma, Neuroligin, SVCT2, NLGN4Y, Krm, TrkB, GRB10, Semaphorin 6B, ECE2, GABA-A receptor gamma-2 subunit, SFRP, Phosphatase regulator (inhibitor), PEA3, CRB2, ProSAPiP1, CAMK1D, NAV1,…
2	generation of neurons	2476	6.48657e-15	1.12273e-11	6.48657e-15	1.12273e-11	60	Plexin A2, KLF7, EPHA10, RXRA, BIN1 (Amphiphysin II), CSPG4 (NG2), MSK1, PBX, P/Q-type calcium channel alpha-1A subunit, Plexin B3, Ataxin-1, LZK(MAP3K13), DGK, ADAR2, DGK-gamma, Neuroligin, SVCT2, Krm, TrkB, GRB10, Semaphorin 6B, SFRP, Phosphatase regulator (inhibitor), PEA3, ProSAPiP1, CAMK1D, NAV1, RAR-gamma/RXR-alpha, VDR/RXR-alpha, BMP receptor 2, SFRP2, PTCHD2, RAR, XYLT1, TCF8, Exostosin-1…
3	neurogenesis	2636	7.71103e-15	1.12273e-11	7.71103e-15	1.12273e-11	62	Plexin A2, KLF7, EPHA10, RXRA, BIN1 (Amphiphysin II), Periaxin, CSPG4 (NG2), MSK1, PBX, P/Q-type calcium channel alpha-1A subunit, Plexin B3, Ataxin-1, LZK(MAP3K13), DGK, ADAR2, DGK-gamma, Neuroligin, SVCT2, Krm, TrkB, GRB10, Semaphorin 6B, SFRP, Phosphatase regulator (inhibitor), PEA3, ProSAPiP1, CAMK1D, NAV1, RAR-gamma/RXR-alpha, VDR/RXR-alpha, BMP receptor 2, SFRP2, PTCHD2, RAR, XYLT1, TCF8, E…
4	regulation of nervous system development	1510	3.06003e-14	3.34155e-11	3.06003e-14	3.34155e-11	45	Plexin A2, Lrrc24, RXRA, BIN1 (Amphiphysin II), LRRTM4, CSPG4 (NG2), PBX, P/Q-type calcium channel alpha-1A subunit, Plexin B3, Ataxin-1, LZK(MAP3K13), DGK, DGK-gamma, Neuroligin, SVCT2, Krm, TrkB, Semaphorin 6B, SFRP, Phosphatase regulator (inhibitor), ProSAPiP1, CAMK1D, Galpha(q)-specific THRH&S GPCRs, RAR-gamma/RXR-alpha, VDR/RXR-alpha, BMP receptor 2, SFRP2, PTCHD2, RAR, XYLT1, TCF8, Krm1, Tr…
5	system development	6754	5.50146e-14	4.80608e-11	5.50146e-14	4.80608e-11	106	Plexin A2, Creatine transporter 1 (SLC6A8), Keratin 8, KLF7, EPHA10, RXRA, BIN1 (Amphiphysin II), Delta-sarcoglycan, FAM73B, Periaxin, PDE2A, PIP5KII, A20, Polycystin 2, CREB5, G-protein alpha-11, Transgelin-3, CSPG4 (NG2), VDR, APHC, MSK1, PBX, P/Q-type calcium channel alpha-1A subunit, Plexin B3, Ataxin-1, LZK(MAP3K13), DGK, ADAR2, DGK-gamma, Neuroligin, ESM-1, SVCT2, NLGN4Y, Krm, TrkB, GRB10, …
6	multicellular organism development	7593	1.52954e-13	1.1135e-10	1.52954e-13	1.1135e-10	113	Plexin A2, Creatine transporter 1 (SLC6A8), Keratin 8, KLF7, EPHA10, RXRA, BIN1 (Amphiphysin II), Delta-sarcoglycan, FAM73B, Periaxin, PDE2A, PIP5KII, MAFG, SPRED2, A20, GCNF, Polycystin 2, CREB5, eIF2C2 (Argonaute-2), G-protein alpha-11, Transgelin-3, CSPG4 (NG2), VDR, APHC, MSK1, PBX, P/Q-type calcium channel alpha-1A subunit, Plexin B3, Ataxin-1, LZK(MAP3K13), DGK, ADAR2, DGK-gamma, Neuroligin…
7	synaptic signaling	758	1.04478e-12	6.51943e-10	1.04478e-12	6.51943e-10	30	G-protein alpha-11, P/Q-type calcium channel alpha-1A subunit, SV2C, Ataxin-1, DGK, ADAR2, Neuroligin, NLGN4Y, GIPC, TrkB, CACNA1C, GABA-A receptor gamma-2 subunit, Phosphatase regulator (inhibitor), Dynamin-1, CACNA1D, Exostosin-1, Dystrobrevin beta, Myosin Va, KCC2, CACNB, Synaptotagmin II, Synaptotagmin, KCNQ2, CACNB4, PDE, G-protein alpha-q/11, RIMS3, Neurabin-1, CACNA1 L-type, Dynamin
8	cell-cell signaling	1697	1.80957e-12	9.88027e-10	1.80957e-12	9.88027e-10	45	Kir3.4, eIF2C1 (Argonaute-1), Polycystin 2, eIF2C2 (Argonaute-2), G-protein alpha-11, P/Q-type calcium channel alpha-1A subunit, SV2C, Ataxin-1, DGK, ADAR2, Neuroligin, NLGN4Y, Krm, GIPC, TrkB, GBR1, ECE2, CACNA1C, GABA-A receptor gamma-2 subunit, SFRP, Phosphatase regulator (inhibitor), Dynamin-1, Galpha(q)-specific THRH&S GPCRs, RAR-gamma/RXR-alpha, CACNA1D, SFRP2, RAR, Exostosin-1, Dystrobrevi…
9	regulation of neuron differentiation	1102	6.00947e-12	2.68784e-09	6.00947e-12	2.68784e-09	35	Plexin A2, BIN1 (Amphiphysin II), CSPG4 (NG2), PBX, P/Q-type calcium channel alpha-1A subunit, Plexin B3, LZK(MAP3K13), DGK, DGK-gamma, Neuroligin, SVCT2, Krm, TrkB, Semaphorin 6B, SFRP, Phosphatase regulator (inhibitor), ProSAPiP1, CAMK1D, BMP receptor 2, SFRP2, PTCHD2, RAR, XYLT1, TCF8, Krm1, Trim67, Synaptotagmin II, MAP6, Synaptotagmin, INPP5, PBX1, ATF/CREB, Neurabin-1, Dynamin, SPOCK
10	anatomical structure development	8098	6.15349e-12	2.68784e-09	6.15349e-12	2.68784e-09	114	Plexin A2, Creatine transporter 1 (SLC6A8), ORP-family, Keratin 8, KLF7, EPHA10, RXRA, BIN1 (Amphiphysin II), Delta-sarcoglycan, FAM73B, Periaxin, PDE2A, PIP5KII, MAFG, SPRED2, A20, GCNF, Polycystin 2, CREB5, eIF2C2 (Argonaute-2), G-protein alpha-11, Transgelin-3, CSPG4 (NG2), VDR, APHC, MSK1, PBX, P/Q-type calcium channel alpha-1A subunit, Plexin B3, Ataxin-1, LZK(MAP3K13), DGK, ADAR2, DGK-gamma…
11	regulation of multicellular organismal process	4748	7.12955e-12	2.83108e-09	7.12955e-12	2.83108e-09	81	Kir3.4, Plexin A2, eIF2C1 (Argonaute-1), KLF7, Lrrc24, RXRA, BIN1 (Amphiphysin II), LRRTM4, MAFG, SPRED2, A20, eIF2C2 (Argonaute-2), CSPG4 (NG2), VDR, MSK1, PBX, P/Q-type calcium channel alpha-1A subunit, Plexin B3, Ataxin-1, PER1, LZK(MAP3K13), DGK, DGK-gamma, Neuroligin, SVCT2, Krm, KIBRA, CLOCK, TrkB, GRB10, Semaphorin 6B, CACNA1C, OTUD7B, SFRP, Phosphatase regulator (inhibitor), PEA3, CRB2, P…
12	trans-synaptic signaling	690	2.04287e-11	7.43604e-09	2.04287e-11	7.43604e-09	27	P/Q-type calcium channel alpha-1A subunit, SV2C, Ataxin-1, DGK, ADAR2, Neuroligin, NLGN4Y, GIPC, TrkB, CACNA1C, GABA-A receptor gamma-2 subunit, Phosphatase regulator (inhibitor), Dynamin-1, CACNA1D, Exostosin-1, Myosin Va, KCC2, CACNB, Synaptotagmin II, Synaptotagmin, KCNQ2, CACNB4, PDE, RIMS3, Neurabin-1, CACNA1 L-type, Dynamin
13	developmental process	8706	2.47382e-11	8.31203e-09	2.47382e-11	8.31203e-09	118	Plexin A2, Creatine transporter 1 (SLC6A8), ORP-family, Keratin 8, KLF7, EPHA10, RXRA, BIN1 (Amphiphysin II), Delta-sarcoglycan, FAM73B, Periaxin, PDE2A, PIP5KII, MAFG, SPRED2, A20, GCNF, Polycystin 2, CREB5, eIF2C2 (Argonaute-2), G-protein alpha-11, Transgelin-3, CSPG4 (NG2), VDR, Elk-4, APHC, MSK1, PBX, P/Q-type calcium channel alpha-1A subunit, Plexin B3, Ataxin-1, LZK(MAP3K13), DGK, ADAR2, DG…
14	regulation of multicellular organismal development	3202	4.17188e-11	1.1471e-08	4.17188e-11	1.1471e-08	62	Plexin A2, eIF2C1 (Argonaute-1), KLF7, Lrrc24, RXRA, BIN1 (Amphiphysin II), LRRTM4, MAFG, SPRED2, A20, eIF2C2 (Argonaute-2), CSPG4 (NG2), VDR, PBX, P/Q-type calcium channel alpha-1A subunit, Plexin B3, Ataxin-1, LZK(MAP3K13), DGK, DGK-gamma, Neuroligin, SVCT2, Krm, CLOCK, TrkB, Semaphorin 6B, SFRP, Phosphatase regulator (inhibitor), PEA3, CRB2, ProSAPiP1, CAMK1D, SOCS5, Galpha(q)-specific THRH&S …
15	cell development	2630	4.39767e-11	1.1471e-08	4.39767e-11	1.1471e-08	55	Plexin A2, ORP-family, Keratin 8, KLF7, EPHA10, RXRA, BIN1 (Amphiphysin II), Delta-sarcoglycan, Periaxin, PDE2A, PIP5KII, CSPG4 (NG2), MSK1, PBX, P/Q-type calcium channel alpha-1A subunit, Plexin B3, DGK, ADAR2, DGK-gamma, Neuroligin, TrkB, GRB10, Semaphorin 6B, PI52A, SFRP, Phosphatase regulator (inhibitor), PEA3, ARID4B, RAR-gamma/RXR-alpha, VDR/RXR-alpha, BMP receptor 2, PDE4, SFRP2, RAR, Exos…
16	chemical synaptic transmission	662	4.58574e-11	1.1471e-08	4.58574e-11	1.1471e-08	26	P/Q-type calcium channel alpha-1A subunit, SV2C, Ataxin-1, DGK, ADAR2, Neuroligin, NLGN4Y, GIPC, CACNA1C, GABA-A receptor gamma-2 subunit, Phosphatase regulator (inhibitor), Dynamin-1, CACNA1D, Exostosin-1, Myosin Va, KCC2, CACNB, Synaptotagmin II, Synaptotagmin, KCNQ2, CACNB4, PDE, RIMS3, Neurabin-1, CACNA1 L-type, Dynamin
17	anterograde trans-synaptic signaling	662	4.58574e-11	1.1471e-08	4.58574e-11	1.1471e-08	26	P/Q-type calcium channel alpha-1A subunit, SV2C, Ataxin-1, DGK, ADAR2, Neuroligin, NLGN4Y, GIPC, CACNA1C, GABA-A receptor gamma-2 subunit, Phosphatase regulator (inhibitor), Dynamin-1, CACNA1D, Exostosin-1, Myosin Va, KCC2, CACNB, Synaptotagmin II, Synaptotagmin, KCNQ2, CACNB4, PDE, RIMS3, Neurabin-1, CACNA1 L-type, Dynamin
18	cell differentiation	5601	4.72706e-11	1.1471e-08	4.72706e-11	1.1471e-08	88	Plexin A2, ORP-family, Keratin 8, KLF7, EPHA10, RXRA, BIN1 (Amphiphysin II), Delta-sarcoglycan, Periaxin, PDE2A, PIP5KII, A20, GCNF, CREB5, eIF2C2 (Argonaute-2), CSPG4 (NG2), VDR, Elk-4, MSK1, PBX, P/Q-type calcium channel alpha-1A subunit, Plexin B3, Ataxin-1, LZK(MAP3K13), DGK, ADAR2, DGK-gamma, Neuroligin, SVCT2, Krm, TrkB, GRB10, GBR1, Semaphorin 6B, ECE2, PI52A, SFRP, MMP-15, Phosphatase reg…
19	regulation of cell differentiation	2891	5.64127e-11	1.2969e-08	5.64127e-11	1.2969e-08	58	Plexin A2, eIF2C1 (Argonaute-1), KLF7, BIN1 (Amphiphysin II), MAFG, SPRED2, G-protein alpha-11, CSPG4 (NG2), VDR, PBX, P/Q-type calcium channel alpha-1A subunit, Plexin B3, Ataxin-1, LZK(MAP3K13), DGK, DGK-gamma, Neuroligin, SVCT2, Krm, CLOCK, TrkB, Semaphorin 6B, SFRP, Phosphatase regulator (inhibitor), PEA3, CRB2, ProSAPiP1, CAMK1D, SOCS5, RAR-gamma/RXR-alpha, VDR/RXR-alpha, BMP receptor 2, SFR…
20	regulation of neurogenesis	1343	8.33413e-11	1.82017e-08	8.33413e-11	1.82017e-08	37	Plexin A2, BIN1 (Amphiphysin II), CSPG4 (NG2), PBX, P/Q-type calcium channel alpha-1A subunit, Plexin B3, Ataxin-1, LZK(MAP3K13), DGK, DGK-gamma, Neuroligin, SVCT2, Krm, TrkB, Semaphorin 6B, SFRP, Phosphatase regulator (inhibitor), ProSAPiP1, CAMK1D, BMP receptor 2, SFRP2, PTCHD2, RAR, XYLT1, TCF8, Krm1, Trim67, Synaptotagmin II, MAP6, Synaptotagmin, MKP-5, INPP5, PBX1, ATF/CREB, Neurabin-1, Dyna…
21	cellular developmental process	5668	9.11977e-11	1.89691e-08	9.11977e-11	1.89691e-08	88	Plexin A2, ORP-family, Keratin 8, KLF7, EPHA10, RXRA, BIN1 (Amphiphysin II), Delta-sarcoglycan, Periaxin, PDE2A, PIP5KII, A20, GCNF, CREB5, eIF2C2 (Argonaute-2), CSPG4 (NG2), VDR, Elk-4, MSK1, PBX, P/Q-type calcium channel alpha-1A subunit, Plexin B3, Ataxin-1, LZK(MAP3K13), DGK, ADAR2, DGK-gamma, Neuroligin, SVCT2, Krm, TrkB, GRB10, GBR1, Semaphorin 6B, ECE2, PI52A, SFRP, MMP-15, Phosphatase reg…
22	regulation of developmental process	3978	1.07633e-10	2.13701e-08	1.07633e-10	2.13701e-08	70	Plexin A2, eIF2C1 (Argonaute-1), KLF7, Lrrc24, RXRA, BIN1 (Amphiphysin II), LRRTM4, MAFG, SPRED2, A20, eIF2C2 (Argonaute-2), G-protein alpha-11, CSPG4 (NG2), VDR, ATPase VC, PBX, P/Q-type calcium channel alpha-1A subunit, Plexin B3, Ataxin-1, LZK(MAP3K13), DGK, DGK-gamma, Neuroligin, SVCT2, Krm, KIBRA, CLOCK, TrkB, Semaphorin 6B, CACNA1C, SFRP, Phosphatase regulator (inhibitor), PEA3, CRB2, ProSA…
23	regulation of neuron projection development	866	1.41321e-10	2.68386e-08	1.41321e-10	2.68386e-08	29	Plexin A2, CSPG4 (NG2), P/Q-type calcium channel alpha-1A subunit, Plexin B3, LZK(MAP3K13), DGK, DGK-gamma, Neuroligin, SVCT2, Krm, TrkB, Semaphorin 6B, SFRP, Phosphatase regulator (inhibitor), ProSAPiP1, CAMK1D, BMP receptor 2, SFRP2, XYLT1, Krm1, Trim67, Synaptotagmin II, MAP6, Synaptotagmin, INPP5, ATF/CREB, Neurabin-1, Dynamin, SPOCK
24	regulation of cell development	1579	1.5596e-10	2.83848e-08	1.5596e-10	2.83848e-08	40	Plexin A2, BIN1 (Amphiphysin II), CSPG4 (NG2), PBX, P/Q-type calcium channel alpha-1A subunit, Plexin B3, Ataxin-1, LZK(MAP3K13), DGK, DGK-gamma, Neuroligin, SVCT2, Krm, CLOCK, TrkB, Semaphorin 6B, SFRP, Phosphatase regulator (inhibitor), ProSAPiP1, CAMK1D, BMP receptor 2, SFRP2, PTCHD2, RAR, XYLT1, TCF8, Krm1, Trim67, Synaptotagmin II, MAP6, Synaptotagmin, MKP-5, INPP5, PDE, DOCK5, PBX1, ATF/CRE…
25	behavior	1081	3.21811e-10	5.62269e-08	3.21811e-10	5.62269e-08	32	MAFG, PBX, P/Q-type calcium channel alpha-1A subunit, Ataxin-1, DGK, ADAR2, Neuroligin, NLGN4Y, TrkB, CACNA1C, SLC24A2, GABA-A receptor gamma-2 subunit, Dynamin-1, Galpha(q)-specific THRH&S GPCRs, SOBP, PDE4, CACNA1D, Exostosin-1, Myosin Va, KCC2, SCN9A, CACNB, Synaptotagmin, CACNB4, PDE, G-protein alpha-q/11, C5orf41, PDE4D, ATF/CREB, HIPK2, CACNA1 L-type, Dynamin
26	modulation of chemical synaptic transmission	786	3.72656e-10	6.26061e-08	3.72656e-10	6.26061e-08	27	P/Q-type calcium channel alpha-1A subunit, MCR, DGK, Neuroligin, NLGN4Y, RASGRF2, GIPC, TrkB, GBR1, SLC24A2, Phosphatase regulator (inhibitor), Dynamin-1, Galpha(q)-specific THRH&S GPCRs, PDE4, CACNA1D, RAR, SCN9A, CACNB, Synaptotagmin II, Synaptotagmin, CACNB4, PDE, RIMS3, ATF/CREB, Neurabin-1, CACNA1 L-type, Dynamin
27	regulation of trans-synaptic signaling	788	3.93982e-10	6.37375e-08	3.93982e-10	6.37375e-08	27	P/Q-type calcium channel alpha-1A subunit, MCR, DGK, Neuroligin, NLGN4Y, RASGRF2, GIPC, TrkB, GBR1, SLC24A2, Phosphatase regulator (inhibitor), Dynamin-1, Galpha(q)-specific THRH&S GPCRs, PDE4, CACNA1D, RAR, SCN9A, CACNB, Synaptotagmin II, Synaptotagmin, CACNB4, PDE, RIMS3, ATF/CREB, Neurabin-1, CACNA1 L-type, Dynamin
28	neuron development	1359	4.55996e-10	6.72785e-08	4.55996e-10	6.72785e-08	36	Plexin A2, KLF7, EPHA10, RXRA, CSPG4 (NG2), MSK1, PBX, P/Q-type calcium channel alpha-1A subunit, Plexin B3, DGK, ADAR2, DGK-gamma, Neuroligin, TrkB, GRB10, Semaphorin 6B, Phosphatase regulator (inhibitor), PEA3, RAR-gamma/RXR-alpha, VDR/RXR-alpha, Exostosin-1, MSK1/2 (RPS6KA5/4), KCC2, KIAA1853, RXR, LIFR, MAP6, Myopalladin, PDE, G-protein alpha-q/11, PBX1, ATF/CREB, Neurabin-1, CXXC6, CACNA1 L-…
29	positive regulation of cellular process	7836	4.61502e-10	6.72785e-08	4.61502e-10	6.72785e-08	107	Plexin A2, eIF2C1 (Argonaute-1), ORP-family, HIVEP2, KLF7, EPHA10, Lrrc24, RXRA, BIN1 (Amphiphysin II), LRRTM4, PIP5KII, MAFG, SPRED2, A20, GCNF, Polycystin 2, CREB5, eIF2C2 (Argonaute-2), CSPG4 (NG2), VDR, Elk-4, APHC, MSK1, PBX, Plexin B3, Ataxin-1, PER1, TRH receptor, MCR, LZK(MAP3K13), DGK, ADAR2, Neuroligin, ZNF462, ESM-1, SVCT2, RASGRF2, MLK2(MAP3K10), GIPC, KIBRA, MAP3K2 (MEKK2), CLOCK, Tr…
30	negative regulation of multicellular organismal process	1931	4.62078e-10	6.72785e-08	4.62078e-10	6.72785e-08	44	eIF2C1 (Argonaute-1), KLF7, BIN1 (Amphiphysin II), SPRED2, A20, CSPG4 (NG2), MSK1, PBX, Neuroligin, Krm, KIBRA, Semaphorin 6B, OTUD7B, SFRP, PEA3, SOCS5, Galpha(q)-specific THRH&S GPCRs, RAR-gamma/RXR-alpha, BMP receptor 2, PDE4, SFRP2, PTCHD2, RAR, XYLT1, KLF13, Krm1, MSK1/2 (RPS6KA5/4), CACNB, TFE3, Synaptotagmin, MKP-5, INPP5, PDE, CRY1, DOCK4, PDE4D, DOCK5, PBX1, ATF/CREB, RARgamma, TGF-beta …
31	cell communication	8097	6.41481e-10	9.03868e-08	6.41481e-10	9.03868e-08	109	Kir3.4, Plexin A2, eIF2C1 (Argonaute-1), Keratin 8, HIVEP2, EPHA10, RXRA, Delta-sarcoglycan, Periaxin, PDE2A, PIP5KII, KCNMB3, SPRED2, A20, GCNF, Polycystin 2, eIF2C2 (Argonaute-2), G-protein alpha-11, MRCKalpha, CSPG4 (NG2), VDR, MSK1, PBX, P/Q-type calcium channel alpha-1A subunit, SV2C, Plexin B3, Ataxin-1, TRH receptor, MCR, LZK(MAP3K13), DGK, ADAR2, DGK-gamma, Neuroligin, NLGN4Y, RASGRF2, ML…
32	regulation of neurotransmitter secretion	226	6.7639e-10	9.14332e-08	6.7639e-10	9.14332e-08	15	P/Q-type calcium channel alpha-1A subunit, MCR, DGK, Neuroligin, GIPC, TrkB, Phosphatase regulator (inhibitor), CACNA1D, CACNB, Synaptotagmin II, Synaptotagmin, CACNB4, RIMS3, Neurabin-1, CACNA1 L-type
33	neuron differentiation	1661	6.90773e-10	9.14332e-08	6.90773e-10	9.14332e-08	40	Plexin A2, KLF7, EPHA10, RXRA, CSPG4 (NG2), MSK1, PBX, P/Q-type calcium channel alpha-1A subunit, Plexin B3, DGK, ADAR2, DGK-gamma, Neuroligin, TrkB, GRB10, Semaphorin 6B, SFRP, Phosphatase regulator (inhibitor), PEA3, RAR-gamma/RXR-alpha, VDR/RXR-alpha, Exostosin-1, MSK1/2 (RPS6KA5/4), KCC2, KIAA1853, RXR, LIFR, DNMT3A, MAP6, Myopalladin, PDE, G-protein alpha-q/11, PBX1, ATF/CREB, Neurabin-1, CX…
34	regulation of cell communication	4929	9.3228e-10	1.19771e-07	9.3228e-10	1.19771e-07	78	eIF2C1 (Argonaute-1), ORP-family, KLF7, PDE2A, PIP5KII, SPRED2, A20, Polycystin 2, MRCKalpha, CSPG4 (NG2), P/Q-type calcium channel alpha-1A subunit, Ataxin-1, PER1, MCR, LZK(MAP3K13), DGK, DGK-gamma, Neuroligin, ESM-1, NLGN4Y, RASGRF2, MLK2(MAP3K10), Krm, GIPC, KIBRA, MAP3K2 (MEKK2), CLOCK, SRGAP2(WRP), TrkB, GRB10, GBR1, CACNA1C, OTUD7B, PI52A, SLC24A2, SFRP, Phosphatase regulator (inhibitor), …
35	signaling	7940	1.06433e-09	1.32828e-07	1.06433e-09	1.32828e-07	107	Kir3.4, Plexin A2, eIF2C1 (Argonaute-1), Keratin 8, HIVEP2, EPHA10, RXRA, BIN1 (Amphiphysin II), Delta-sarcoglycan, Periaxin, PDE2A, PIP5KII, KCNMB3, SPRED2, A20, GCNF, Polycystin 2, eIF2C2 (Argonaute-2), G-protein alpha-11, MRCKalpha, CSPG4 (NG2), VDR, MSK1, PBX, P/Q-type calcium channel alpha-1A subunit, SV2C, Plexin B3, Ataxin-1, TRH receptor, MCR, LZK(MAP3K13), DGK, ADAR2, DGK-gamma, Neurolig…
36	regulation of signaling	4971	1.39966e-09	1.69826e-07	1.39966e-09	1.69826e-07	78	eIF2C1 (Argonaute-1), ORP-family, KLF7, PDE2A, PIP5KII, SPRED2, A20, Polycystin 2, MRCKalpha, CSPG4 (NG2), P/Q-type calcium channel alpha-1A subunit, Ataxin-1, PER1, MCR, LZK(MAP3K13), DGK, DGK-gamma, Neuroligin, ESM-1, NLGN4Y, RASGRF2, MLK2(MAP3K10), Krm, GIPC, KIBRA, MAP3K2 (MEKK2), CLOCK, SRGAP2(WRP), TrkB, GRB10, GBR1, CACNA1C, OTUD7B, PI52A, SLC24A2, SFRP, Phosphatase regulator (inhibitor), …
37	ion transport	1861	1.67359e-09	1.97574e-07	1.67359e-09	1.97574e-07	42	Kir3.4, Creatine transporter 1 (SLC6A8), ORP-family, RXRA, KCNMB3, Polycystin 2, ATP13A3, ANO3, VDR, SMVT, ATPase VC, P/Q-type calcium channel alpha-1A subunit, SVCT2, GIPC, TMEM63B, TrkB, CACL, CACNA1C, SLC24A2, GABA-A receptor gamma-2 subunit, ORP2, FAM155A, SLC19A2, RAR-gamma/RXR-alpha, VDR/RXR-alpha, CACNA1D, SLC6A17, SLC15A4, KCC2, SCN9A, CACNB, RXR, SLC25A37, TMEM16H, Kv1.4, Synaptotagmin, …
38	positive regulation of synaptic vesicle exocytosis	30	3.98046e-09	4.57543e-07	3.98046e-09	4.57543e-07	7	Neuroligin, CACNA1D, CACNB, Synaptotagmin II, Synaptotagmin, CACNB4, CACNA1 L-type
39	regulation of neurotransmitter transport	260	4.61934e-09	5.17366e-07	4.61934e-09	5.17366e-07	15	P/Q-type calcium channel alpha-1A subunit, MCR, DGK, Neuroligin, GIPC, TrkB, Phosphatase regulator (inhibitor), CACNA1D, CACNB, Synaptotagmin II, Synaptotagmin, CACNB4, RIMS3, Neurabin-1, CACNA1 L-type
40	regulation of biological quality	5809	5.20487e-09	5.68372e-07	5.20487e-09	5.68372e-07	85	Kir3.4, Plexin A2, ORP-family, KLF7, Lrrc24, BIN1 (Amphiphysin II), Delta-sarcoglycan, LRRTM4, PDE2A, MAFG, KCNMB3, A20, Polycystin 2, ATP13A3, ANO3, G-protein alpha-11, VDR, ATPase VC, P/Q-type calcium channel alpha-1A subunit, Plexin B3, Ataxin-1, TRH receptor, MCR, LZK(MAP3K13), DGK, DGK-gamma, Neuroligin, RASGRF2, GIPC, CLOCK, TrkB, GRB10, GBR1, Semaphorin 6B, ECE2, CACNA1C, SLC24A2, GABA-A r…
41	multicellular organismal process	10586	5.54109e-09	5.90329e-07	5.54109e-09	5.90329e-07	128	Kir3.4, Plexin A2, Creatine transporter 1 (SLC6A8), ORP-family, Keratin 8, KLF7, EPHA10, RXRA, BIN1 (Amphiphysin II), Delta-sarcoglycan, FAM73B, Periaxin, PDE2A, PIP5KII, MAFG, KCNMB3, SPRED2, A20, GCNF, Polycystin 2, CREB5, eIF2C2 (Argonaute-2), G-protein alpha-11, Transgelin-3, CSPG4 (NG2), VDR, APHC, SMVT, MSK1, PBX, P/Q-type calcium channel alpha-1A subunit, Plexin B3, Ataxin-1, PER1, MCR, LZ…
42	positive regulation of transcription by RNA polymerase II	1793	6.15047e-09	6.39649e-07	6.15047e-09	6.39649e-07	40	eIF2C1 (Argonaute-1), HIVEP2, KLF7, RXRA, MAFG, GCNF, Polycystin 2, CREB5, eIF2C2 (Argonaute-2), VDR, Elk-4, MSK1, PBX, Ataxin-1, PER1, ZNF462, KIBRA, CLOCK, SFRP, PEA3, ARID4B, RAR-gamma/RXR-alpha, VDR/RXR-alpha, BMP receptor 2, SFRP2, ZNF821, RAR, KLF13, TCF8, MSK1/2 (RPS6KA5/4), RXR, TFE3, Sgsm1, C5orf41, FAM130A2, PBX1, ATF/CREB, RARgamma, CXXC6, HIPK2
43	negative regulation of cellular process	6985	6.84706e-09	6.95534e-07	6.84706e-09	6.95534e-07	96	Plexin A2, eIF2C1 (Argonaute-1), ORP-family, KLF7, RXRA, BIN1 (Amphiphysin II), PDE2A, SPRED2, A20, GCNF, Polycystin 2, eIF2C2 (Argonaute-2), Transgelin-3, CSPG4 (NG2), VDR, Elk-4, MSK1, PBX, P/Q-type calcium channel alpha-1A subunit, Plexin B3, Ataxin-1, PER1, DGK, ADAR2, DGK-gamma, Neuroligin, SVCT2, Fe65-like2, MLK2(MAP3K10), Krm, GIPC, KIBRA, CLOCK, SRGAP2(WRP), TrkB, GRB10, GBR1, Semaphorin …
44	regulation of molecular function	4294	8.12852e-09	8.0694e-07	8.12852e-09	8.0694e-07	69	Plexin A2, ORP-family, EPHA10, BIN1 (Amphiphysin II), SPRED2, A20, Polycystin 2, CSPG4 (NG2), VDR, MSK1, PBX, P/Q-type calcium channel alpha-1A subunit, Plexin B3, LZK(MAP3K13), DGK, ADAR2, Neuroligin, ZNF462, RASGRF2, MLK2(MAP3K10), MAP3K2 (MEKK2), CLOCK, SRGAP2(WRP), TrkB, GBR1, CACNA1C, SFRP, MMP-15, Phosphatase regulator (inhibitor), CRB2, CAMK1D, SOCS5, VDR/RXR-alpha, PDE4, CACNA1D, SFRP2, T…
45	regulation of membrane potential	693	1.56745e-08	1.52147e-06	1.56745e-08	1.52147e-06	23	Kir3.4, BIN1 (Amphiphysin II), KCNMB3, G-protein alpha-11, P/Q-type calcium channel alpha-1A subunit, Ataxin-1, MCR, DGK, Neuroligin, TrkB, GBR1, CACNA1C, GABA-A receptor gamma-2 subunit, Phosphatase regulator (inhibitor), CACNA1D, SCN9A, CACNB, KCNQ2, CACNB4, G-protein alpha-q/11, RIMS3, Neurabin-1, CACNA1 L-type
46	anion transport	814	1.64466e-08	1.56172e-06	1.64466e-08	1.56172e-06	25	Creatine transporter 1 (SLC6A8), ORP-family, RXRA, ANO3, SMVT, ATPase VC, P/Q-type calcium channel alpha-1A subunit, SVCT2, GIPC, TrkB, CACL, SLC24A2, GABA-A receptor gamma-2 subunit, ORP2, SLC19A2, RAR-gamma/RXR-alpha, VDR/RXR-alpha, SLC6A17, SLC15A4, KCC2, CACNB, RXR, TMEM16H, Synaptotagmin, CACNB4
47	appendage development	287	1.74208e-08	1.5853e-06	1.74208e-08	1.5853e-06	15	Plexin A2, PBX, Krm, CACNA1C, SFRP, RAR-gamma/RXR-alpha, BMP receptor 2, SFRP2, RAR, Exostosin-1, Krm1, G-protein alpha-q/11, PBX1, RARgamma, CACNA1 L-type
48	limb development	287	1.74208e-08	1.5853e-06	1.74208e-08	1.5853e-06	15	Plexin A2, PBX, Krm, CACNA1C, SFRP, RAR-gamma/RXR-alpha, BMP receptor 2, SFRP2, RAR, Exostosin-1, Krm1, G-protein alpha-q/11, PBX1, RARgamma, CACNA1 L-type
49	regulation of plasma membrane bounded cell projection organization	1144	1.95857e-08	1.74592e-06	1.95857e-08	1.74592e-06	30	Plexin A2, CSPG4 (NG2), P/Q-type calcium channel alpha-1A subunit, Plexin B3, LZK(MAP3K13), DGK, DGK-gamma, Neuroligin, SVCT2, Krm, TrkB, Semaphorin 6B, SFRP, Phosphatase regulator (inhibitor), ProSAPiP1, CAMK1D, BMP receptor 2, SFRP2, TBC1D9B, XYLT1, Krm1, Trim67, Synaptotagmin II, MAP6, Synaptotagmin, INPP5, ATF/CREB, Neurabin-1, Dynamin, SPOCK
50	negative regulation of biological process	7670	2.07585e-08	1.81346e-06	2.07585e-08	1.81346e-06	101	Plexin A2, eIF2C1 (Argonaute-1), ORP-family, KLF7, RXRA, BIN1 (Amphiphysin II), PDE2A, SPRED2, A20, GCNF, Polycystin 2, eIF2C2 (Argonaute-2), Transgelin-3, CSPG4 (NG2), VDR, Elk-4, MSK1, PBX, P/Q-type calcium channel alpha-1A subunit, Plexin B3, Ataxin-1, PER1, DGK, ADAR2, DGK-gamma, Neuroligin, SVCT2, Fe65-like2, MLK2(MAP3K10), Krm, GIPC, KIBRA, CLOCK, SRGAP2(WRP), TrkB, GRB10, GBR1, Semaphorin …

## Sheet: Table S3.6-mRNA-GO-TCPP
Enrichment analysis report
Enrichment by GO Processes					TCPP-Con_log2(1.5)all_FRC_RNA
#	Processes	Total	pValue	Min FDR	p-value	FDR	In Data	Network Objects from Active Data
1	negative regulation of response to extracellular stimulus	21	0.000236566	0.108631	0.000236566	0.108631	2	Galpha(q)-specific THRH&S GPCRs, ANKRD25
2	negative regulation of response to nutrient levels	21	0.000236566	0.108631	0.000236566	0.108631	2	Galpha(q)-specific THRH&S GPCRs, ANKRD25
3	metal ion transport	890	0.000325231	0.108631	0.000325231	0.108631	6	Kv1.4, SVCT2, FAM155A, SLC6A17, VDR, SLC25A37
4	ion transport	1861	0.000602066	0.108631	0.000602066	0.108631	8	Kv1.4, SVCT2, ORP2, FAM155A, SLC6A17, VDR, GIPC, SLC25A37
5	regulation of brown fat cell differentiation	34	0.000626477	0.108631	0.000626477	0.108631	2	TFE3, MKP-5
6	metal ion homeostasis	1007	0.000627095	0.108631	0.000627095	0.108631	6	FAM155A, VDR, Galpha(q)-specific THRH&S GPCRs, SLC25A37, Exostosin-1, TRH receptor
7	regulation of response to extracellular stimulus	39	0.000824714	0.108631	0.000824714	0.108631	2	Galpha(q)-specific THRH&S GPCRs, ANKRD25
8	regulation of response to nutrient levels	39	0.000824714	0.108631	0.000824714	0.108631	2	Galpha(q)-specific THRH&S GPCRs, ANKRD25
9	cation homeostasis	1117	0.00107831	0.108631	0.00107831	0.108631	6	FAM155A, VDR, Galpha(q)-specific THRH&S GPCRs, SLC25A37, Exostosin-1, TRH receptor
10	negative regulation of epithelium regeneration	1	0.00108849	0.108631	0.00108849	0.108631	1	MKP-5
11	inorganic ion homeostasis	1132	0.00115545	0.108631	0.00115545	0.108631	6	FAM155A, VDR, Galpha(q)-specific THRH&S GPCRs, SLC25A37, Exostosin-1, TRH receptor
12	regulation of cell death	2639	0.00135291	0.108631	0.00135291	0.108631	9	FAM130A2, SVCT2, Fe65-like2, RASGRF2, VDR, Galpha(q)-specific THRH&S GPCRs, BIN1 (Amphiphysin II), LIFR, ANKRD25
13	cation transport	1169	0.00136405	0.108631	0.00136405	0.108631	6	Kv1.4, SVCT2, FAM155A, SLC6A17, VDR, SLC25A37
14	negative regulation of cellular component movement	454	0.00139188	0.108631	0.00139188	0.108631	4	MKP-5, BIN1 (Amphiphysin II), SRGAP2(WRP), Semaphorin 6B
15	negative regulation of locomotion	458	0.00143748	0.108631	0.00143748	0.108631	4	MKP-5, Galpha(q)-specific THRH&S GPCRs, SRGAP2(WRP), Semaphorin 6B
16	ion homeostasis	1224	0.00172646	0.108631	0.00172646	0.108631	6	FAM155A, VDR, Galpha(q)-specific THRH&S GPCRs, SLC25A37, Exostosin-1, TRH receptor
17	decidualization	59	0.00187893	0.108631	0.00187893	0.108631	2	VDR, Galpha(q)-specific THRH&S GPCRs
18	negative regulation of cardiac muscle cell contraction	2	0.00217584	0.108631	0.00217584	0.108631	1	BIN1 (Amphiphysin II)
19	negative regulation of ventricular cardiac muscle cell action potential	2	0.00217584	0.108631	0.00217584	0.108631	1	BIN1 (Amphiphysin II)
20	L-ascorbic acid transmembrane transport	2	0.00217584	0.108631	0.00217584	0.108631	1	SVCT2
21	membrane bone morphogenesis	2	0.00217584	0.108631	0.00217584	0.108631	1	Exostosin-1
22	transepithelial L-ascorbic acid transport	2	0.00217584	0.108631	0.00217584	0.108631	1	SVCT2
23	negative regulation of vitamin D receptor signaling pathway	2	0.00217584	0.108631	0.00217584	0.108631	1	ANKRD25
24	perichondral bone morphogenesis	2	0.00217584	0.108631	0.00217584	0.108631	1	Exostosin-1
25	negative regulation of aspartic-type endopeptidase activity involved in amyloid precursor protein catabolic process	2	0.00217584	0.108631	0.00217584	0.108631	1	BIN1 (Amphiphysin II)
26	lymphocyte adhesion to endothelial cell of high endothelial venule	2	0.00217584	0.108631	0.00217584	0.108631	1	Exostosin-1
27	iron import into the mitochondrion	2	0.00217584	0.108631	0.00217584	0.108631	1	SLC25A37
28	regulation of developmental growth	567	0.00312196	0.11634	0.00312196	0.11634	4	SVCT2, MKP-5, Galpha(q)-specific THRH&S GPCRs, Semaphorin 6B
29	regulation of programmed cell death	2408	0.00319994	0.11634	0.00319994	0.11634	8	FAM130A2, Fe65-like2, RASGRF2, VDR, Galpha(q)-specific THRH&S GPCRs, BIN1 (Amphiphysin II), LIFR, ANKRD25
30	regulation of epithelium regeneration	3	0.00326205	0.11634	0.00326205	0.11634	1	MKP-5
31	ghrelin secretion	3	0.00326205	0.11634	0.00326205	0.11634	1	Galpha(q)-specific THRH&S GPCRs
32	mesenchymal cell differentiation involved in bone development	3	0.00326205	0.11634	0.00326205	0.11634	1	Exostosin-1
33	positive regulation of small intestinal transit	3	0.00326205	0.11634	0.00326205	0.11634	1	Galpha(q)-specific THRH&S GPCRs
34	negative regulation of calcium ion transmembrane transport via high voltage-gated calcium channel	3	0.00326205	0.11634	0.00326205	0.11634	1	BIN1 (Amphiphysin II)
35	negative regulation of aspartic-type peptidase activity	3	0.00326205	0.11634	0.00326205	0.11634	1	BIN1 (Amphiphysin II)
36	regulation of small intestinal transit	3	0.00326205	0.11634	0.00326205	0.11634	1	Galpha(q)-specific THRH&S GPCRs
37	negative regulation of response to external stimulus	579	0.0033654	0.11634	0.0033654	0.11634	4	MKP-5, Galpha(q)-specific THRH&S GPCRs, ANKRD25, Semaphorin 6B
38	regulation of cellular component biogenesis	1418	0.00361922	0.11634	0.00361922	0.11634	6	TBC1D9B, CXXC6, Galpha(q)-specific THRH&S GPCRs, BIN1 (Amphiphysin II), ANKRD25, TRH receptor
39	ameboidal-type cell migration	303	0.00424848	0.11634	0.00424848	0.11634	3	GIPC, ANKRD25, Semaphorin 6B
40	vitamin D receptor signaling pathway	4	0.00434712	0.11634	0.00434712	0.11634	1	VDR
41	lipid tube assembly	4	0.00434712	0.11634	0.00434712	0.11634	1	BIN1 (Amphiphysin II)
42	negative regulation of DNA methylation-dependent heterochromatin assembly	4	0.00434712	0.11634	0.00434712	0.11634	1	CXXC6
43	regulation of hindgut contraction	4	0.00434712	0.11634	0.00434712	0.11634	1	Galpha(q)-specific THRH&S GPCRs
44	glomerular visceral epithelial cell migration	4	0.00434712	0.11634	0.00434712	0.11634	1	ANKRD25
45	positive regulation of vitamin D 24-hydroxylase activity	4	0.00434712	0.11634	0.00434712	0.11634	1	VDR
46	5-methylcytosine metabolic process	4	0.00434712	0.11634	0.00434712	0.11634	1	CXXC6
47	5-methylcytosine catabolic process	4	0.00434712	0.11634	0.00434712	0.11634	1	CXXC6
48	negative regulation of locomotion involved in locomotory behavior	4	0.00434712	0.11634	0.00434712	0.11634	1	Galpha(q)-specific THRH&S GPCRs
49	regulation of vitamin D 24-hydroxylase activity	4	0.00434712	0.11634	0.00434712	0.11634	1	VDR
50	positive regulation of small intestine smooth muscle contraction	4	0.00434712	0.11634	0.00434712	0.11634	1	Galpha(q)-specific THRH&S GPCRs

## Sheet: Table S3.7-mRNA-GO-TDBPP
Enrichment by GO Processes					TDBPP-Con_log2(1.5)all_FRC_RNA
#	Processes	Total	pValue	Min FDR	p-value	FDR	In Data	Network Objects from Active Data
1	system development	6754	1.76562e-67	1.63055e-63	1.76562e-67	1.63055e-63	574	Cyclin G, CLMP, BHLHB4, R-spondins, RXRA, BIN1 (Amphiphysin II), C20orf123, Delta-sarcoglycan, UNC5B, G-protein alpha-11, COX-2 (PTGS2), KLF11 (TIEG2), CD109, Ataxin-1, DGK-gamma, MUSTANG, Peroxiredoxin, ESM-1, CACNG, APOLD1, CACNA1C, ECE2, TRIM46, G-protein beta, BETA-PIX, RTN4RL1, PTP-2, IGSF21, SLC32A1, Galectin-1, NDRG1, MafK, ROBO3, APOD, Dematin, SALL-1, IP3R1, ALDOB, IL11RA, PCDH1, Synapto…
2	multicellular organism development	7593	9.49918e-65	4.38625e-61	9.49918e-65	4.38625e-61	612	Cyclin G, CLMP, BHLHB4, R-spondins, RXRA, BIN1 (Amphiphysin II), C20orf123, Delta-sarcoglycan, UNC5B, GCNF, G-protein alpha-11, COX-2 (PTGS2), KLF11 (TIEG2), CD109, Ataxin-1, DGK-gamma, MUSTANG, Peroxiredoxin, ESM-1, CACNG, APOLD1, OTUD7B, CACNA1C, ECE2, TRIM46, G-protein beta, Mesogenin 1, BETA-PIX, RTN4RL1, PTP-2, IGSF21, SLC32A1, Galectin-1, SPRED3, NDRG1, MafK, ROBO3, Mxi1, APOD, Dematin, SAL…
3	nervous system development	3688	2.63613e-64	8.11488e-61	2.63613e-64	8.11488e-61	389	Cyclin G, BHLHB4, R-spondins, RXRA, BIN1 (Amphiphysin II), UNC5B, Ataxin-1, DGK-gamma, CACNG, ECE2, TRIM46, G-protein beta, BETA-PIX, RTN4RL1, PTP-2, IGSF21, SLC32A1, Galectin-1, NDRG1, MafK, ROBO3, APOD, SALL-1, IP3R1, PCDH1, Synaptotagmin, SLITRK4, CNTN1 (F3), BAI3, SHOX2, ATP1B2, IGF-1 receptor, nAChR alpha-7, GATA-3, X11, X11-like, KAL1, Beta-2-microglobulin, ZIC2, TRPC5, G-protein beta/gamma…
4	anatomical structure development	8098	1.1252e-62	2.59781e-59	1.1252e-62	2.59781e-59	633	Cyclin G, CLMP, BHLHB4, R-spondins, RXRA, BIN1 (Amphiphysin II), C20orf123, Delta-sarcoglycan, UNC5B, GCNF, G-protein alpha-11, COX-2 (PTGS2), KLF11 (TIEG2), CD109, Ataxin-1, Plectin 1, DGK-gamma, MUSTANG, Peroxiredoxin, ESM-1, CACNG, APOLD1, OTUD7B, CACNA1C, ECE2, TRIM46, G-protein beta, Mesogenin 1, BETA-PIX, RTN4RL1, PTP-2, IGSF21, SLC32A1, Galectin-1, SPRED3, NDRG1, MafK, ROBO3, Mxi1, APOD, D…
5	neurogenesis	2636	1.65019e-62	3.04791e-59	1.65019e-62	3.04791e-59	315	BHLHB4, R-spondins, RXRA, BIN1 (Amphiphysin II), UNC5B, Ataxin-1, DGK-gamma, CACNG, TRIM46, BETA-PIX, RTN4RL1, PTP-2, Galectin-1, NDRG1, ROBO3, APOD, SALL-1, IP3R1, Synaptotagmin, SLITRK4, CNTN1 (F3), BAI3, SHOX2, ATP1B2, IGF-1 receptor, nAChR alpha-7, GATA-3, KAL1, Beta-2-microglobulin, ZIC2, TRPC5, G-protein beta/gamma, TNF-R2, ZNF536, NCX, Galpha(i)-specific peptide GPCRs, Neurexin 1-alpha, Pl…
6	generation of neurons	2476	1.74162e-60	2.68065e-57	1.74162e-60	2.68065e-57	300	BHLHB4, R-spondins, RXRA, BIN1 (Amphiphysin II), UNC5B, Ataxin-1, DGK-gamma, CACNG, TRIM46, RTN4RL1, PTP-2, Galectin-1, ROBO3, APOD, SALL-1, IP3R1, Synaptotagmin, SLITRK4, CNTN1 (F3), BAI3, SHOX2, ATP1B2, IGF-1 receptor, nAChR alpha-7, GATA-3, KAL1, Beta-2-microglobulin, ZIC2, TRPC5, G-protein beta/gamma, TNF-R2, ZNF536, Galpha(i)-specific peptide GPCRs, Neurexin 1-alpha, Plexin B3, SCRT1, S1P1 r…
7	developmental process	8706	1.46471e-59	1.93237e-56	1.46471e-59	1.93237e-56	656	Cyclin G, CLMP, Cyclin I, BHLHB4, R-spondins, RXRA, BIN1 (Amphiphysin II), C20orf123, Delta-sarcoglycan, UNC5B, GCNF, G-protein alpha-11, COX-2 (PTGS2), KLF11 (TIEG2), CD109, Ataxin-1, Plectin 1, DGK-gamma, MUSTANG, Peroxiredoxin, ESM-1, CACNG, APOLD1, OTUD7B, CACNA1C, ECE2, TRIM46, G-protein beta, Mesogenin 1, BETA-PIX, RTN4RL1, PTP-2, IGSF21, SLC32A1, Galectin-1, SPRED3, NDRG1, Sequestosome 1(p…
8	cellular developmental process	5668	1.80575e-54	2.08452e-51	1.80575e-54	2.08452e-51	486	BHLHB4, R-spondins, RXRA, BIN1 (Amphiphysin II), C20orf123, Delta-sarcoglycan, UNC5B, GCNF, COX-2 (PTGS2), CD109, Ataxin-1, Plectin 1, DGK-gamma, MUSTANG, Peroxiredoxin, CACNG, APOLD1, ECE2, TRIM46, Mesogenin 1, BETA-PIX, RTN4RL1, PTP-2, Galectin-1, NDRG1, Sequestosome 1(p62), ROBO3, APOD, Dematin, SALL-1, IP3R1, IL11RA, Synaptotagmin, SLITRK4, CNTN1 (F3), BAI3, SHOX2, ATP1B2, IGF-1 receptor, nAC…
9	neuron differentiation	1661	1.57173e-53	1.60102e-50	1.57173e-53	1.60102e-50	227	BHLHB4, R-spondins, RXRA, UNC5B, DGK-gamma, TRIM46, RTN4RL1, PTP-2, ROBO3, APOD, SALL-1, IP3R1, SLITRK4, CNTN1 (F3), BAI3, IGF-1 receptor, nAChR alpha-7, GATA-3, KAL1, ZIC2, TRPC5, G-protein beta/gamma, Galpha(i)-specific peptide GPCRs, Neurexin 1-alpha, Plexin B3, S1P1 receptor, DSCAM, OLIG1, Islet-1, PMX2B, DRF, C1orf187, GATA Group, C6orf134, Rho GTPase, PP2A regulatory, Ionotropic glutamate r…
10	cell differentiation	5601	1.73364e-53	1.60102e-50	1.73364e-53	1.60102e-50	480	BHLHB4, R-spondins, RXRA, BIN1 (Amphiphysin II), C20orf123, Delta-sarcoglycan, UNC5B, GCNF, COX-2 (PTGS2), CD109, Ataxin-1, Plectin 1, DGK-gamma, MUSTANG, Peroxiredoxin, CACNG, APOLD1, ECE2, TRIM46, Mesogenin 1, BETA-PIX, RTN4RL1, PTP-2, Galectin-1, NDRG1, Sequestosome 1(p62), ROBO3, APOD, Dematin, SALL-1, IP3R1, IL11RA, Synaptotagmin, SLITRK4, CNTN1 (F3), BAI3, SHOX2, ATP1B2, IGF-1 receptor, nAC…
11	anatomical structure morphogenesis	3270	8.06224e-51	6.76862e-48	8.06224e-51	6.76862e-48	335	Cyclin G, BHLHB4, R-spondins, RXRA, Delta-sarcoglycan, UNC5B, COX-2 (PTGS2), CD109, MUSTANG, ESM-1, APOLD1, CACNA1C, TRIM46, Mesogenin 1, RTN4RL1, ROBO3, Mxi1, APOD, SALL-1, SLITRK4, BAI3, Heme oxygenase 1, SHOX2, Decorin proteoglycan, IGF-1 receptor, nAChR alpha-7, GATA-3, AES (GRG), KAL1, Keratin 8, ZIC2, G-protein beta/gamma, TNMD, NCX, Galpha(i)-specific peptide GPCRs, Neurexin 1-alpha, Plexi…
12	regulation of multicellular organismal process	4748	7.56782e-50	5.82407e-47	7.56782e-50	5.82407e-47	423	BHLHB4, R-spondins, RXRA, BIN1 (Amphiphysin II), C20orf123, COX-2 (PTGS2), CD109, Ataxin-1, LRFN5, DGK-gamma, MUSTANG, Peroxiredoxin, BDKRB1, LINGO4, CACNG, APOLD1, OTUD7B, CACNA1C, TRIM46, AMPK alpha subunit, RTN4RL1, 9330182L06Rik, Galectin-1, SPRED3, APOD, Dematin, SALL-1, IP3R1, Synaptotagmin, SLITRK4, CNTN1 (F3), BAI3, Desmin, CACNA1E, Heme oxygenase 1, SHOX2, ATP1B2, Decorin proteoglycan, C…
13	regulation of developmental process	3978	9.38237e-50	6.66509e-47	9.38237e-50	6.66509e-47	377	BHLHB4, R-spondins, RXRA, BIN1 (Amphiphysin II), C20orf123, G-protein alpha-11, COX-2 (PTGS2), CD109, Ataxin-1, LRFN5, DGK-gamma, MUSTANG, Peroxiredoxin, LINGO4, CACNG, APOLD1, CACNA1C, TRIM46, G-protein beta, BETA-PIX, AMPK alpha subunit, RTN4RL1, 9330182L06Rik, Galectin-1, SPRED3, Dematin, SALL-1, IP3R1, Synaptotagmin, SLITRK4, CNTN1 (F3), BAI3, Heme oxygenase 1, SHOX2, ATP1B2, Decorin proteogl…
14	regulation of multicellular organismal development	3202	3.75883e-48	2.47949e-45	3.75883e-48	2.47949e-45	325	BHLHB4, R-spondins, RXRA, BIN1 (Amphiphysin II), C20orf123, COX-2 (PTGS2), CD109, Ataxin-1, LRFN5, DGK-gamma, MUSTANG, Peroxiredoxin, LINGO4, CACNG, APOLD1, TRIM46, AMPK alpha subunit, RTN4RL1, 9330182L06Rik, Galectin-1, SPRED3, SALL-1, IP3R1, Synaptotagmin, SLITRK4, CNTN1 (F3), BAI3, Heme oxygenase 1, SHOX2, ATP1B2, Decorin proteoglycan, IGF-1 receptor, nAChR alpha-7, GATA-3, GADD45 alpha, CYLD,…
15	multicellular organismal process	10586	2.15903e-47	1.32924e-44	2.15903e-47	1.32924e-44	715	Cyclin G, CLMP, Cyclin I, TECTB, BHLHB4, R-spondins, RXRA, BIN1 (Amphiphysin II), C20orf123, Delta-sarcoglycan, UNC5B, GCNF, G-protein alpha-11, NF-AT5, COX-2 (PTGS2), KLF11 (TIEG2), CD109, Ataxin-1, Plectin 1, DGK-gamma, MUSTANG, Peroxiredoxin, ESM-1, BDKRB1, CACNG, GIPC, APOLD1, OTUD7B, CACNA1C, ECE2, TRIM46, G-protein beta, Mesogenin 1, BETA-PIX, AMPK alpha subunit, RTN4RL1, PTP-2, IGSF21, SLC…
16	regulation of nervous system development	1510	2.16226e-46	1.24803e-43	2.16226e-46	1.24803e-43	203	RXRA, BIN1 (Amphiphysin II), Ataxin-1, LRFN5, DGK-gamma, LINGO4, CACNG, TRIM46, RTN4RL1, 9330182L06Rik, Galectin-1, SALL-1, IP3R1, Synaptotagmin, SLITRK4, CNTN1 (F3), BAI3, SHOX2, ATP1B2, IGF-1 receptor, GATA-3, Beta-2-microglobulin, TRPC5, TNF-R2, ZNF536, Galpha(i)-specific peptide GPCRs, Neurexin 1-alpha, Plexin B3, SCRT1, DSCAM, Islet-1, Galpha(q)-specific metabotropic glutamate GPCRs, PMX2B, …
17	regulation of biological quality	5809	7.92872e-44	4.30716e-41	7.92872e-44	4.30716e-41	468	Calretinin, SV2B, BIN1 (Amphiphysin II), Delta-sarcoglycan, G-protein alpha-11, COX-2 (PTGS2), Ataxin-1, LRFN5, DGK-gamma, Peroxiredoxin, TRIM9, BDKRB1, DUOXA2, LINGO4, CACNG, GIPC, XPR1, CACNA1C, ECE2, TRIM46, G-protein beta, BETA-PIX, AMPK alpha subunit, NENF, CADPS, SLC32A1, Galectin-1, C7, Sequestosome 1(p62), MafK, Mxi1, C15orf59, Glycogen phosphorylase, Dematin, SLC25A37, IP3R1, ATP6V0C, Sy…
18	cell development	2630	1.25842e-43	6.45641e-41	1.25842e-43	6.45641e-41	278	BHLHB4, RXRA, BIN1 (Amphiphysin II), Delta-sarcoglycan, UNC5B, DGK-gamma, TRIM46, RTN4RL1, NDRG1, ROBO3, APOD, Dematin, IP3R1, SLITRK4, CNTN1 (F3), BAI3, SHOX2, IGF-1 receptor, nAChR alpha-7, GATA-3, TTC21A, KAL1, ORP-family, Keratin 8, ALAS2, ZIC2, G-protein beta/gamma, TNMD, NCX, Galpha(i)-specific peptide GPCRs, Neurexin 1-alpha, Plexin B3, Kindlin-2, DSCAM, BAF180, OLIG1, Islet-1, Matrilin-1,…
19	regulation of signaling	4971	2.88927e-43	1.40434e-40	2.88927e-43	1.40434e-40	420	Calretinin, ARHGAP20, MAGI-3, R-spondins, UNC5B, NF-AT5, COX-2 (PTGS2), CD109, Ataxin-1, DGK-gamma, Peroxiredoxin, ESM-1, CACNG, GIPC, OTUD7B, CACNA1C, BETA-PIX, AMPK alpha subunit, NENF, STAP-2, PTP-2, 9330182L06Rik, S-arrestin, Galectin-1, SPRED3, Sequestosome 1(p62), APOD, Dematin, SALL-1, IP3R1, ATP6V0C, Synaptotagmin, Thioredoxin, CACNA1E, Heme oxygenase 1, SHOX2, ATP1B2, Decorin proteoglyca…
20	animal organ development	5194	1.80879e-41	8.35209e-39	1.80879e-41	8.35209e-39	428	Cyclin G, BHLHB4, R-spondins, RXRA, C20orf123, Delta-sarcoglycan, G-protein alpha-11, COX-2 (PTGS2), KLF11 (TIEG2), CD109, Ataxin-1, MUSTANG, Peroxiredoxin, CACNA1C, ECE2, G-protein beta, BETA-PIX, RTN4RL1, PTP-2, SLC32A1, Galectin-1, APOD, Dematin, SALL-1, IP3R1, ALDOB, IL11RA, Synaptotagmin, CNTN1 (F3), Desmin, Heme oxygenase 1, SHOX2, ATP1B2, Decorin proteoglycan, IGF-1 receptor, GATA-3, CAD, …
21	regulation of cell communication	4929	1.19561e-40	5.25782e-38	1.19561e-40	5.25782e-38	411	Calretinin, ARHGAP20, MAGI-3, R-spondins, UNC5B, NF-AT5, COX-2 (PTGS2), CD109, Ataxin-1, DGK-gamma, Peroxiredoxin, ESM-1, CACNG, GIPC, OTUD7B, CACNA1C, BETA-PIX, AMPK alpha subunit, NENF, STAP-2, PTP-2, 9330182L06Rik, S-arrestin, Galectin-1, SPRED3, Sequestosome 1(p62), APOD, Dematin, SALL-1, IP3R1, ATP6V0C, Synaptotagmin, Thioredoxin, CACNA1E, Heme oxygenase 1, SHOX2, Decorin proteoglycan, CNIH2…
22	neuron development	1359	8.87653e-38	3.72613e-35	8.87653e-38	3.72613e-35	176	BHLHB4, RXRA, UNC5B, DGK-gamma, TRIM46, RTN4RL1, ROBO3, APOD, IP3R1, SLITRK4, CNTN1 (F3), BAI3, IGF-1 receptor, nAChR alpha-7, GATA-3, KAL1, ZIC2, G-protein beta/gamma, Galpha(i)-specific peptide GPCRs, Neurexin 1-alpha, Plexin B3, DSCAM, Islet-1, PMX2B, DRF, C1orf187, GATA Group, C6orf134, Rho GTPase, PTPR-mu, NGFR(TNFRSF16), SLITRK6, CDK5R1 (p35), NCAM2, MSK1/2 (RPS6KA5/4), Ephrin-A receptor 8,…
23	regulation of cell differentiation	2891	1.032e-37	4.14371e-35	1.032e-37	4.14371e-35	282	BHLHB4, BIN1 (Amphiphysin II), C20orf123, G-protein alpha-11, COX-2 (PTGS2), CD109, Ataxin-1, DGK-gamma, MUSTANG, Peroxiredoxin, CACNG, APOLD1, TRIM46, G-protein beta, BETA-PIX, RTN4RL1, Galectin-1, SPRED3, Dematin, SALL-1, IP3R1, Synaptotagmin, CNTN1 (F3), BAI3, SHOX2, ATP1B2, IGF-1 receptor, GATA-3, CYLD, Beta-2-microglobulin, TRPC5, G-protein beta/gamma, TNF-R2, ZNF536, Galpha(i)-specific pept…
24	positive regulation of cellular process	7836	1.10771e-36	4.26238e-34	1.10771e-36	4.26238e-34	554	RASSF5, BHLHB4, MAGI-3, R-spondins, RXRA, BIN1 (Amphiphysin II), C20orf123, UNC5B, GCNF, NF-AT5, COX-2 (PTGS2), KLF11 (TIEG2), Ataxin-1, MUSTANG, Peroxiredoxin, ESM-1, BDKRB1, DUOXA2, LINGO4, CACNG, GIPC, ZBTB38, CACNA1C, TRIM46, Mesogenin 1, BETA-PIX, AMPK alpha subunit, NENF, SSBP4, STAP-2, CADPS, PTP-2, 9330182L06Rik, Galectin-1, SPRED3, Sequestosome 1(p62), Dematin, SALL-1, IP3R1, IL11RA, Sgs…
25	positive regulation of developmental process	2258	1.44909e-36	5.35294e-34	1.44909e-36	5.35294e-34	238	BIN1 (Amphiphysin II), C20orf123, COX-2 (PTGS2), Ataxin-1, MUSTANG, LINGO4, CACNG, BETA-PIX, AMPK alpha subunit, 9330182L06Rik, Galectin-1, Dematin, SALL-1, IP3R1, Synaptotagmin, SLITRK4, CNTN1 (F3), BAI3, Heme oxygenase 1, SHOX2, ATP1B2, Decorin proteoglycan, IGF-1 receptor, nAChR alpha-7, GATA-3, HMGI/Y, CYLD, Beta-2-microglobulin, ZIC2, TRPC5, G-protein beta/gamma, TNF-R2, NCX, Galpha(i)-speci…
26	regulation of neurogenesis	1343	2.89229e-36	1.02732e-33	2.89229e-36	1.02732e-33	172	BIN1 (Amphiphysin II), Ataxin-1, DGK-gamma, CACNG, TRIM46, RTN4RL1, Galectin-1, SALL-1, IP3R1, Synaptotagmin, CNTN1 (F3), BAI3, SHOX2, ATP1B2, IGF-1 receptor, GATA-3, Beta-2-microglobulin, TRPC5, TNF-R2, ZNF536, Galpha(i)-specific peptide GPCRs, Plexin B3, SCRT1, DSCAM, Islet-1, Galpha(q)-specific metabotropic glutamate GPCRs, PMX2B, DRF, ETO, C1orf187, GATA Group, Angiotensinogen, Rho GTPase, PP…
27	negative regulation of cellular process	6985	1.08756e-34	3.71987e-32	1.08756e-34	3.71987e-32	505	Cyclin G, RASSF5, BHLHB4, RXRA, BIN1 (Amphiphysin II), UNC5B, GCNF, COX-2 (PTGS2), KLF11 (TIEG2), CD109, Ataxin-1, LRFN5, DGK-gamma, Peroxiredoxin, TRIM9, BDKRB1, GIPC, ZBTB38, OTUD7B, TRIM46, G-protein beta, BETA-PIX, AMPK alpha subunit, NENF, RTN4RL1, PTP-2, S-arrestin, Galectin-1, SPRED3, NDRG1, Sequestosome 1(p62), MafK, Mxi1, APOD, Dematin, SALL-1, IP3R1, TAP1 (PSF1), ATP6V0C, Synaptotagmin,…
28	regulation of localization	4025	1.78851e-34	5.89888e-32	1.78851e-34	5.89888e-32	343	RASSF5, R-spondins, BIN1 (Amphiphysin II), COX-2 (PTGS2), TRIM9, BDKRB1, DUOXA2, CACNG, GIPC, OTUD7B, CACNA1C, TRIM46, G-protein beta, BETA-PIX, AMPK alpha subunit, CADPS, PTP-2, Sequestosome 1(p62), APOD, Dematin, IP3R1, Synaptotagmin, CNTN1 (F3), Thioredoxin, CACNA1E, Heme oxygenase 1, ATP1B2, Decorin proteoglycan, CNIH2, IGF-1 receptor, C5orf41, Lrrc38, nAChR alpha-7, GluR4, GATA-3, X11, X11-l…
29	regulation of cell development	1579	2.27044e-34	7.23017e-32	2.27044e-34	7.23017e-32	186	BHLHB4, BIN1 (Amphiphysin II), Ataxin-1, DGK-gamma, CACNG, TRIM46, BETA-PIX, RTN4RL1, Galectin-1, Dematin, SALL-1, IP3R1, Synaptotagmin, CNTN1 (F3), BAI3, SHOX2, ATP1B2, IGF-1 receptor, GATA-3, Beta-2-microglobulin, TRPC5, TNF-R2, ZNF536, Galpha(i)-specific peptide GPCRs, Plexin B3, SCRT1, DSCAM, Islet-1, Galpha(q)-specific metabotropic glutamate GPCRs, PMX2B, DRF, ETO, C1orf187, GATA Group, Angi…
30	neuron projection development	1094	9.20752e-34	2.83438e-31	9.20752e-34	2.83438e-31	148	RXRA, UNC5B, TRIM46, RTN4RL1, ROBO3, APOD, IP3R1, SLITRK4, CNTN1 (F3), IGF-1 receptor, nAChR alpha-7, GATA-3, KAL1, ZIC2, Galpha(i)-specific peptide GPCRs, Neurexin 1-alpha, Plexin B3, DSCAM, Islet-1, PMX2B, DRF, C1orf187, GATA Group, Rho GTPase, PTPR-mu, NGFR(TNFRSF16), SLITRK6, CDK5R1 (p35), NCAM2, MSK1/2 (RPS6KA5/4), Ephrin-A receptor 8, Fyn, PI3K cat class IA, PRICKLE2, POU4F1, AP-1, Ephrin-A…
31	positive regulation of biological process	8589	1.12631e-32	3.35532e-30	1.12631e-32	3.35532e-30	579	RASSF5, BHLHB4, MAGI-3, R-spondins, RXRA, BIN1 (Amphiphysin II), C20orf123, UNC5B, GCNF, NF-AT5, COX-2 (PTGS2), KLF11 (TIEG2), Ataxin-1, MUSTANG, Peroxiredoxin, ESM-1, BDKRB1, DUOXA2, LINGO4, CACNG, GIPC, ZBTB38, CACNA1C, TRIM46, Mesogenin 1, BETA-PIX, AMPK alpha subunit, NENF, SSBP4, STAP-2, CADPS, PTP-2, 9330182L06Rik, Galectin-1, SPRED3, C7, Myosin-IIA, Sequestosome 1(p62), Dematin, SALL-1, IP…
32	cell-cell signaling	1697	1.05154e-31	3.03468e-29	1.05154e-31	3.03468e-29	189	SV2B, R-spondins, G-protein alpha-11, SV2C, Ataxin-1, TRIM9, GIPC, CACNA1C, ECE2, G-protein beta, AMPK alpha subunit, CADPS, PTP-2, SLC32A1, ASCT1 (SLC1A4), C15orf59, PCDH1, Synaptotagmin, CACNA1E, CNIH2, nAChR alpha-7, GluR4, GATA-3, X11, X11-like, AES (GRG), CYLD, nAChR beta-3, DGAT1, G-protein beta/gamma, TNF-R2, Galpha(i)-specific peptide GPCRs, Neurexin 1-alpha, Kindlin-2, R-spondin 1, CtBP,…
33	regulation of neuron differentiation	1102	3.40893e-31	9.53983e-29	3.40893e-31	9.53983e-29	144	BIN1 (Amphiphysin II), DGK-gamma, CACNG, TRIM46, RTN4RL1, Galectin-1, SALL-1, IP3R1, Synaptotagmin, CNTN1 (F3), BAI3, SHOX2, ATP1B2, IGF-1 receptor, GATA-3, Beta-2-microglobulin, TRPC5, ZNF536, Galpha(i)-specific peptide GPCRs, Plexin B3, DSCAM, Islet-1, PMX2B, ETO, C1orf187, GATA Group, Angiotensinogen, Rho GTPase, PP2A regulatory, Ionotropic glutamate receptor, NGFR(TNFRSF16), CDK5R1 (p35), Fyn…
34	regulation of signal transduction	4340	4.013e-31	1.09e-28	4.013e-31	1.09e-28	352	ARHGAP20, MAGI-3, R-spondins, UNC5B, NF-AT5, COX-2 (PTGS2), CD109, Ataxin-1, DGK-gamma, Peroxiredoxin, ESM-1, CACNG, GIPC, OTUD7B, BETA-PIX, AMPK alpha subunit, NENF, STAP-2, PTP-2, 9330182L06Rik, S-arrestin, Galectin-1, SPRED3, Sequestosome 1(p62), APOD, Dematin, SALL-1, IP3R1, ATP6V0C, Thioredoxin, Heme oxygenase 1, SHOX2, Decorin proteoglycan, CNIH2, IGF-1 receptor, C5orf41, nAChR alpha-7, Glu…
35	positive regulation of multicellular organismal process	2770	7.07614e-31	1.86709e-28	7.07614e-31	1.86709e-28	258	BIN1 (Amphiphysin II), C20orf123, COX-2 (PTGS2), Ataxin-1, MUSTANG, Peroxiredoxin, LINGO4, CACNG, AMPK alpha subunit, Galectin-1, Dematin, SALL-1, IP3R1, Synaptotagmin, SLITRK4, CNTN1 (F3), BAI3, Heme oxygenase 1, SHOX2, ATP1B2, IGF-1 receptor, nAChR alpha-7, GATA-3, CYLD, Beta-2-microglobulin, TLR5, ZIC2, TRPC5, G-protein beta/gamma, COX-1 (PTGS1), TNF-R2, NCX, Galpha(i)-specific peptide GPCRs, …
36	negative regulation of multicellular organismal process	1931	1.06582e-30	2.73413e-28	1.06582e-30	2.73413e-28	203	BHLHB4, R-spondins, BIN1 (Amphiphysin II), COX-2 (PTGS2), Peroxiredoxin, BDKRB1, OTUD7B, TRIM46, RTN4RL1, 9330182L06Rik, Galectin-1, SPRED3, APOD, SALL-1, Synaptotagmin, BAI3, Heme oxygenase 1, ATP1B2, Decorin proteoglycan, nAChR alpha-7, GATA-3, GADD45 alpha, CYLD, Beta-2-microglobulin, TRPC5, TNMD, TNF-R2, ZNF536, Galpha(i)-specific peptide GPCRs, STAT5, Islet-1, PMX2B, DRF, CBP, ETO, Vitronect…
37	negative regulation of biological process	7670	1.4308e-30	3.57119e-28	1.4308e-30	3.57119e-28	527	Cyclin G, RASSF5, BHLHB4, R-spondins, RXRA, BIN1 (Amphiphysin II), UNC5B, GCNF, COX-2 (PTGS2), KLF11 (TIEG2), CD109, Ataxin-1, KGUA, LRFN5, DGK-gamma, Peroxiredoxin, TRIM9, BDKRB1, GIPC, ZBTB38, OTUD7B, TRIM46, G-protein beta, BETA-PIX, AMPK alpha subunit, NENF, RTN4RL1, PTP-2, 9330182L06Rik, S-arrestin, Galectin-1, SPRED3, NDRG1, Sequestosome 1(p62), MafK, Mxi1, APOD, Dematin, SALL-1, IP3R1, TAP…
38	regulation of cell population proliferation	2610	1.67047e-30	4.05969e-28	1.67047e-30	4.05969e-28	247	RASSF5, R-spondins, RXRA, C20orf123, COX-2 (PTGS2), KLF11 (TIEG2), CD109, Ataxin-1, MUSTANG, Peroxiredoxin, ESM-1, AMPK alpha subunit, PTP-2, NDRG1, Mxi1, APOD, SALL-1, IP3R1, IL11RA, Heme oxygenase 1, SHOX2, IGF-1 receptor, nAChR alpha-7, GATA-3, HMGI/Y, Beta-2-microglobulin, TRPC5, G-protein beta/gamma, TNMD, COX-1 (PTGS1), TNF-R2, Galpha(i)-specific peptide GPCRs, Plexin B3, STAT5, S1P1 recept…
39	response to abiotic stimulus	2080	3.01123e-30	7.13045e-28	3.01123e-30	7.13045e-28	212	G-protein alpha-11, NF-AT5, COX-2 (PTGS2), Ataxin-1, BDKRB1, APOLD1, CACNA1C, G-protein beta, AMPK alpha subunit, S-arrestin, NDRG1, Glycogen phosphorylase, IP3R1, Thioredoxin, CACNA1E, Heme oxygenase 1, Decorin proteoglycan, IGF-1 receptor, nAChR alpha-7, GATA-3, GADD45 alpha, Keratin 8, ALAS2, TLR5, G-protein beta/gamma, NCX, Galpha(i)-specific peptide GPCRs, Neurexin 1-alpha, HIG1, STAT5, mGlu…
40	plasma membrane bounded cell projection organization	1687	3.16842e-29	7.3151e-27	3.16842e-29	7.3151e-27	183	RXRA, UNC5B, TRIM46, BETA-PIX, RTN4RL1, ARL13A, ROBO3, APOD, Dematin, IP3R1, SLITRK4, CNTN1 (F3), ATP1B2, IGF-1 receptor, nAChR alpha-7, GATA-3, TTC21A, KAL1, ZIC2, DNAH7, Galpha(i)-specific peptide GPCRs, Neurexin 1-alpha, Plexin B3, S1P1 receptor, DSCAM, Islet-1, PMX2B, DRF, C1orf187, GATA Group, H-cadherin, C6orf134, Rho GTPase, PTPR-mu, NGFR(TNFRSF16), SLITRK6, CDK5R1 (p35), NCAM2, MSK1/2 (RP…
41	cell morphogenesis	1115	4.79296e-29	1.07958e-26	4.79296e-29	1.07958e-26	141	UNC5B, TRIM46, RTN4RL1, ROBO3, SLITRK4, IGF-1 receptor, nAChR alpha-7, GATA-3, KAL1, Keratin 8, ZIC2, TNMD, Galpha(i)-specific peptide GPCRs, Neurexin 1-alpha, Plexin B3, Kindlin-2, DSCAM, Islet-1, Matrilin-1, PMX2B, C1orf187, GATA Group, H-cadherin, Rho GTPase, PTPR-mu, NGFR(TNFRSF16), SLITRK6, CDK5R1 (p35), MSK1/2 (RPS6KA5/4), Ephrin-A receptor 8, Fyn, PI3K cat class IA, PROX1, POU4F1, Ephrin-A…
42	cell projection morphogenesis	770	6.8302e-29	1.50183e-26	6.8302e-29	1.50183e-26	113	UNC5B, TRIM46, RTN4RL1, ROBO3, SLITRK4, IGF-1 receptor, nAChR alpha-7, GATA-3, KAL1, ZIC2, Galpha(i)-specific peptide GPCRs, Neurexin 1-alpha, Plexin B3, DSCAM, Islet-1, PMX2B, C1orf187, GATA Group, Rho GTPase, PTPR-mu, NGFR(TNFRSF16), SLITRK6, CDK5R1 (p35), MSK1/2 (RPS6KA5/4), Ephrin-A receptor 8, Fyn, PI3K cat class IA, POU4F1, Ephrin-A receptors, Galpha(i)-specific amine GPCRs, MSK1, PAK, IGSF…
43	circulatory system development	1432	9.02976e-29	1.9393e-26	9.02976e-29	1.9393e-26	164	R-spondins, RXRA, Delta-sarcoglycan, UNC5B, G-protein alpha-11, COX-2 (PTGS2), ESM-1, APOLD1, CACNA1C, ECE2, APOD, SALL-1, Heme oxygenase 1, SHOX2, IGF-1 receptor, GATA-3, CAD, TNF-R2, NCX, Galpha(i)-specific peptide GPCRs, Neurexin 1-alpha, S1P1 receptor, BAF180, Islet-1, DRF, GATA Group, Angiotensinogen, H-cadherin, Rho GTPase, NGFR(TNFRSF16), Dynein, axonemal, heavy chains, Serotonin receptor,…
44	regulation of membrane potential	693	1.18438e-28	2.48585e-26	1.18438e-28	2.48585e-26	106	BIN1 (Amphiphysin II), G-protein alpha-11, Ataxin-1, Peroxiredoxin, CACNG, CACNA1C, C15orf59, CACNA1E, ATP1B2, Decorin proteoglycan, CNIH2, nAChR alpha-7, GluR4, Beta-2-microglobulin, nAChR beta-3, TRPC5, NCX, Galpha(i)-specific peptide GPCRs, Neurexin 1-alpha, KCNH5, mGluR1, Galpha(q)-specific metabotropic glutamate GPCRs, Angiotensinogen, SLC4A8, Nav1.6, Ionotropic glutamate receptor, NGFR(TNFR…
45	neuron projection morphogenesis	757	2.34517e-28	4.81281e-26	2.34517e-28	4.81281e-26	111	UNC5B, TRIM46, RTN4RL1, ROBO3, SLITRK4, IGF-1 receptor, nAChR alpha-7, GATA-3, KAL1, ZIC2, Galpha(i)-specific peptide GPCRs, Neurexin 1-alpha, Plexin B3, DSCAM, Islet-1, PMX2B, C1orf187, GATA Group, Rho GTPase, PTPR-mu, NGFR(TNFRSF16), SLITRK6, CDK5R1 (p35), MSK1/2 (RPS6KA5/4), Ephrin-A receptor 8, Fyn, PI3K cat class IA, POU4F1, Ephrin-A receptors, Galpha(i)-specific amine GPCRs, MSK1, PAK, IGSF…
46	synaptic signaling	758	2.63319e-28	5.2119e-26	2.63319e-28	5.2119e-26	111	SV2B, G-protein alpha-11, SV2C, Ataxin-1, TRIM9, GIPC, CACNA1C, G-protein beta, CADPS, SLC32A1, ASCT1 (SLC1A4), C15orf59, Synaptotagmin, CACNA1E, CNIH2, nAChR alpha-7, GluR4, X11, X11-like, nAChR beta-3, G-protein beta/gamma, Galpha(i)-specific peptide GPCRs, Neurexin 1-alpha, CtBP, mGluR1, Galpha(q)-specific metabotropic glutamate GPCRs, NSF, GPR176, SYP, Rho GTPase, Ionotropic glutamate recepto…
47	positive regulation of signaling	2698	2.65251e-28	5.2119e-26	2.65251e-28	5.2119e-26	247	MAGI-3, R-spondins, UNC5B, NF-AT5, COX-2 (PTGS2), Peroxiredoxin, ESM-1, CACNG, GIPC, BETA-PIX, AMPK alpha subunit, NENF, STAP-2, 9330182L06Rik, Galectin-1, SPRED3, Sequestosome 1(p62), Dematin, SALL-1, ATP6V0C, Synaptotagmin, Thioredoxin, Heme oxygenase 1, SHOX2, Decorin proteoglycan, IGF-1 receptor, C5orf41, nAChR alpha-7, GluR4, GATA-3, GADD45 alpha, CYLD, ORP-family, TLR5, ZIC2, Bcl-G, G-prote…
48	regulation of transport	2801	3.73145e-28	7.17916e-26	3.73145e-28	7.17916e-26	253	R-spondins, BIN1 (Amphiphysin II), COX-2 (PTGS2), TRIM9, BDKRB1, CACNG, GIPC, CACNA1C, TRIM46, G-protein beta, BETA-PIX, AMPK alpha subunit, CADPS, APOD, Dematin, IP3R1, Synaptotagmin, CNTN1 (F3), Thioredoxin, CACNA1E, Heme oxygenase 1, ATP1B2, CNIH2, C5orf41, Lrrc38, nAChR alpha-7, GluR4, X11, X11-like, Cacng6, Beta-2-microglobulin, ORP-family, nAChR beta-3, TLR5, DGAT1, G-protein beta/gamma, CO…
49	plasma membrane bounded cell projection morphogenesis	762	4.17565e-28	7.86981e-26	4.17565e-28	7.86981e-26	111	UNC5B, TRIM46, RTN4RL1, ROBO3, SLITRK4, IGF-1 receptor, nAChR alpha-7, GATA-3, KAL1, ZIC2, Galpha(i)-specific peptide GPCRs, Neurexin 1-alpha, Plexin B3, DSCAM, Islet-1, PMX2B, C1orf187, GATA Group, Rho GTPase, PTPR-mu, NGFR(TNFRSF16), SLITRK6, CDK5R1 (p35), MSK1/2 (RPS6KA5/4), Ephrin-A receptor 8, Fyn, PI3K cat class IA, POU4F1, Ephrin-A receptors, Galpha(i)-specific amine GPCRs, MSK1, PAK, IGSF…
50	axon development	684	6.62513e-28	1.22366e-25	6.62513e-28	1.22366e-25	104	RXRA, UNC5B, TRIM46, RTN4RL1, ROBO3, APOD, SLITRK4, IGF-1 receptor, GATA-3, KAL1, ZIC2, Galpha(i)-specific peptide GPCRs, Neurexin 1-alpha, Plexin B3, DSCAM, Islet-1, PMX2B, C1orf187, GATA Group, Rho GTPase, PTPR-mu, NGFR(TNFRSF16), SLITRK6, CDK5R1 (p35), NCAM2, MSK1/2 (RPS6KA5/4), Ephrin-A receptor 8, Fyn, PI3K cat class IA, POU4F1, AP-1, Ephrin-A receptors, Galpha(i)-specific amine GPCRs, MSK1,…

## Sheet: Table S3.8-mRNA-GO-TIBP
Enrichment analysis report
Enrichment by GO Processes					TiBP-Con_log2(1.5)all_FRC_RNA
#	Processes	Total	pValue	Min FDR	p-value	FDR	In Data	Network Objects from Active Data
1	system development	6754	1.69701e-46	1.47623e-42	1.69701e-46	1.47623e-42	409	PTPR-beta, ITGA4, Ephrin-A, PTHR1, Plexin A2, WASF subunit, CLMP, CBSL, AK3L1, QKI, BHLHB4, KLF7, TMEM41B, K(+) channel, subfamily J, RXRA, BIN1 (Amphiphysin II), RhoJ, Delta-sarcoglycan, AP-2A, PIP5KII, Deoxyribonuclease II, UNC5B, TfR1, G-protein alpha-11, FHL2, OPN5, APHC, DDRGK1, PCDHA10(CNR8), CARP, KLF11 (TIEG2), Ataxin-1, APJ, RBP-J kappa (CBF1), Angiopoietin-like 2, Connexin 50, ADAR2, DG…
2	multicellular organism development	7593	1.31808e-40	5.73297e-37	1.31808e-40	5.73297e-37	427	PTPR-beta, ITGA4, Ephrin-A, PTHR1, Plexin A2, WASF subunit, CLMP, CBSL, AK3L1, QKI, BHLHB4, KLF7, TMEM41B, K(+) channel, subfamily J, RXRA, BIN1 (Amphiphysin II), RhoJ, Delta-sarcoglycan, AP-2A, PIP5KII, Deoxyribonuclease II, SPRED2, UNC5B, GCNF, TfR1, G-protein alpha-11, FHL2, OPN5, APHC, DDRGK1, PCDHA10(CNR8), CARP, KLF11 (TIEG2), Ataxin-1, APJ, RBP-J kappa (CBF1), Angiopoietin-like 2, Connexin…
3	anatomical structure development	8098	3.45804e-37	1.00272e-33	3.45804e-37	1.00272e-33	437	PTPR-beta, ITGA4, Ephrin-A, PTHR1, Plexin A2, WASF subunit, CLMP, CBSL, AK3L1, QKI, BHLHB4, KLF7, TMEM41B, K(+) channel, subfamily J, RXRA, BIN1 (Amphiphysin II), RhoJ, Delta-sarcoglycan, AP-2A, PIP5KII, Deoxyribonuclease II, SPRED2, UNC5B, GCNF, ADAM12, TfR1, G-protein alpha-11, FHL2, OPN5, APHC, DDRGK1, PCDHA10(CNR8), CARP, KLF11 (TIEG2), Ataxin-1, APJ, RBP-J kappa (CBF1), Angiopoietin-like 2, …
4	nervous system development	3688	5.49729e-36	1.19552e-32	5.49729e-36	1.19552e-32	259	ITGA4, Ephrin-A, Plexin A2, WASF subunit, CBSL, AK3L1, QKI, BHLHB4, KLF7, TMEM41B, K(+) channel, subfamily J, RXRA, BIN1 (Amphiphysin II), AP-2A, UNC5B, APHC, PCDHA10(CNR8), CARP, Ataxin-1, RBP-J kappa (CBF1), ADAR2, DGK-gamma, Leptin receptor, MICAL-L1, PLA2, TrkB, G-protein alpha-t, ECE2, NeuroD2, GABA-A receptor gamma-2 subunit, SFRP, G-protein beta, BETA-PIX, Mn(III)-Apotransferrin, ATP1A3, P…
5	developmental process	8706	5.34327e-35	9.29623e-32	5.34327e-35	9.29623e-32	453	PTPR-beta, ITGA4, Ephrin-A, PTHR1, Plexin A2, WASF subunit, CLMP, CBSL, AK3L1, QKI, BHLHB4, KLF7, TMEM41B, K(+) channel, subfamily J, RXRA, BIN1 (Amphiphysin II), RhoJ, Delta-sarcoglycan, AP-2A, PIP5KII, Deoxyribonuclease II, SPRED2, UNC5B, SOAT1, GCNF, ADAM12, TfR1, G-protein alpha-11, FHL2, OPN5, APHC, DDRGK1, PCDHA10(CNR8), CARP, KLF11 (TIEG2), Ataxin-1, APJ, RBP-J kappa (CBF1), Angiopoietin-l…
6	regulation of biological quality	5809	2.02058e-34	2.92951e-31	2.02058e-34	2.92951e-31	344	Ephrin-A, PTHR1, Plexin A2, ZSWIM7, WASF subunit, CBSL, AK3L1, QKI, KLF7, K(+) channel, subfamily J, BIN1 (Amphiphysin II), RhoJ, Delta-sarcoglycan, LRRTM4, Deoxyribonuclease II, SOAT1, TfR1, G-protein alpha-11, DDRGK1, TfR2, Ataxin-1, TRH receptor, APJ, RBP-J kappa (CBF1), MCR, DGK-gamma, Leptin receptor, LINGO4, GIPC, Kv10.1, PLA2, AAK1, CLOCK, TrkB, G-protein alpha-t, CACNA1C, ECE2, NeuroD2, G…
7	multicellular organismal process	10586	5.92923e-34	7.36834e-31	5.92923e-34	7.36834e-31	514	PTPR-beta, ITGA4, Ephrin-A, PTHR1, Plexin A2, WASF subunit, CLMP, CBSL, AK3L1, QKI, BHLHB4, KLF7, TMEM41B, K(+) channel, subfamily J, RXRA, BIN1 (Amphiphysin II), RhoJ, Delta-sarcoglycan, AP-2A, PIP5KII, Deoxyribonuclease II, SPRED2, UNC5B, SOAT1, GCNF, TfR1, G-protein alpha-11, NF-AT5, FHL2, OPN5, APHC, SMVT, DDRGK1, PCDHA10(CNR8), CARP, KLF11 (TIEG2), Ataxin-1, APJ, RBP-J kappa (CBF1), MCR, Ang…
8	animal organ development	5194	1.20418e-32	1.3094e-29	1.20418e-32	1.3094e-29	315	ITGA4, Ephrin-A, PTHR1, Plexin A2, WASF subunit, CBSL, AK3L1, QKI, BHLHB4, K(+) channel, subfamily J, RXRA, RhoJ, Delta-sarcoglycan, AP-2A, PIP5KII, Deoxyribonuclease II, TfR1, G-protein alpha-11, FHL2, OPN5, DDRGK1, CARP, KLF11 (TIEG2), Ataxin-1, APJ, RBP-J kappa (CBF1), Connexin 50, ADAR2, Leptin receptor, ARG2, PLA2, TrkB, G-protein alpha-t, CACNA1C, ECE2, NeuroD2, SFRP, G-protein beta, BETA-P…
9	neurogenesis	2636	3.7567e-32	3.63106e-29	3.7567e-32	3.63106e-29	202	ITGA4, Ephrin-A, Plexin A2, WASF subunit, QKI, BHLHB4, KLF7, K(+) channel, subfamily J, RXRA, BIN1 (Amphiphysin II), AP-2A, UNC5B, CARP, Ataxin-1, RBP-J kappa (CBF1), ADAR2, DGK-gamma, Leptin receptor, MICAL-L1, PLA2, TrkB, G-protein alpha-t, NeuroD2, SFRP, BETA-PIX, Mn(III)-Apotransferrin, PRUNE, Transducin, rod-specific, WNT3A, PHF15, MTR, C/EBP, XYLT1, Galectin-1, Exostosin-1, Histone deacetyl…
10	response to abiotic stimulus	2080	6.60263e-31	5.74363e-28	6.60263e-31	5.74363e-28	172	CBSL, MNK1, K(+) channel, subfamily J, AP-2A, TfR1, G-protein alpha-11, NF-AT5, OPN5, CARP, Ataxin-1, RBP-J kappa (CBF1), Leptin receptor, ARG2, PLA2, CLOCK, TrkB, G-protein alpha-t, CACNA1C, NeuroD2, SFRP, G-protein beta, Mn(III)-Apotransferrin, ATP1A3, Fra-1, AMPK alpha subunit, Transducin, rod-specific, S-arrestin, XYLT1, Exostosin-1, Histone deacetylase class II, NDRG1, KCC2, HSP70, Thyroglob…
11	cell differentiation	5601	1.85607e-29	1.46781e-26	1.85607e-29	1.46781e-26	323	ITGA4, Ephrin-A, PTHR1, Plexin A2, WASF subunit, QKI, BHLHB4, KLF7, K(+) channel, subfamily J, RXRA, BIN1 (Amphiphysin II), Delta-sarcoglycan, AP-2A, PIP5KII, Deoxyribonuclease II, UNC5B, SOAT1, GCNF, ADAM12, TfR1, FHL2, CARP, Ataxin-1, APJ, RBP-J kappa (CBF1), ADAR2, DGK-gamma, Leptin receptor, MICAL-L1, Kv10.1, PLA2, TrkB, G-protein alpha-t, ECE2, NeuroD2, SFRP, Mesogenin 1, BETA-PIX, Mn(III)-A…
12	cellular developmental process	5668	3.19937e-29	2.31927e-26	3.19937e-29	2.31927e-26	325	ITGA4, Ephrin-A, PTHR1, Plexin A2, WASF subunit, QKI, BHLHB4, KLF7, K(+) channel, subfamily J, RXRA, BIN1 (Amphiphysin II), Delta-sarcoglycan, AP-2A, PIP5KII, Deoxyribonuclease II, UNC5B, SOAT1, GCNF, ADAM12, TfR1, FHL2, CARP, Ataxin-1, APJ, RBP-J kappa (CBF1), ADAR2, DGK-gamma, Leptin receptor, MICAL-L1, Kv10.1, PLA2, TrkB, G-protein alpha-t, ECE2, NeuroD2, SFRP, Mesogenin 1, BETA-PIX, Mn(III)-A…
13	generation of neurons	2476	9.44718e-29	6.32162e-26	9.44718e-29	6.32162e-26	187	ITGA4, Ephrin-A, Plexin A2, WASF subunit, QKI, BHLHB4, KLF7, RXRA, BIN1 (Amphiphysin II), AP-2A, UNC5B, CARP, Ataxin-1, RBP-J kappa (CBF1), ADAR2, DGK-gamma, MICAL-L1, PLA2, TrkB, G-protein alpha-t, NeuroD2, SFRP, Mn(III)-Apotransferrin, PRUNE, Transducin, rod-specific, WNT3A, PHF15, MTR, C/EBP, XYLT1, Galectin-1, Exostosin-1, Histone deacetylase class II, KCC2, JIP-2, HSP70, KIAA1853, Syntaxin 3…
14	ion transport	1861	1.62106e-28	1.00726e-25	1.62106e-28	1.00726e-25	156	K(+) channel, subfamily J, RXRA, SLC25A22, KV1.6, TfR1, SMVT, PLA2G12, TfR2, GIPC, Kv10.1, PLA2, TrkB, SLC41A2, CACNA1C, GABA-A receptor gamma-2 subunit, SLC7A6, Mn(III)-Apotransferrin, ATP1A3, AMPK alpha subunit, WNT3A, SLC6A16, ASCT1 (SLC1A4), GluR5, KCC2, Thyroglobulin, SLC25A37, SLC25A43, MUNC18, CLCN2, Cadherin 23, Synaptotagmin, CACNA1E, Kir1.1, ATP1B2, KIAA1843, SLC22A6, Lrrc38, GLTPD2, AM…
15	regulation of localization	4025	1.81378e-28	1.05187e-25	1.81378e-28	1.05187e-25	256	ITGA4, Ephrin-A, Plexin A2, KLF7, K(+) channel, subfamily J, BIN1 (Amphiphysin II), RhoJ, CYP51A1, AP-2A, KV1.6, TfR1, DDRGK1, CARP, TfR2, APJ, RBP-J kappa (CBF1), MCR, ADAR2, Leptin receptor, IL-2R beta chain, ARG2, GIPC, Kv10.1, PLA2, AAK1, CLOCK, TrkB, OTUD7B, CACNA1C, SFRP, G-protein beta, BETA-PIX, Mn(III)-Apotransferrin, Rab12, AMPK alpha subunit, WNT3A, C/EBP, SREBP1 precursor, TIP47, GluR…
16	regulation of signaling	4971	5.2335e-28	2.84539e-25	5.2335e-28	2.84539e-25	294	Ephrin-A, WASF subunit, CBSL, MAGI-3, KLF7, K(+) channel, subfamily J, RhoJ, AP-2A, PIP5KII, SPRED2, UNC5B, TfR1, NF-AT5, FHL2, DDRGK1, CARP, TfR2, Ataxin-1, APJ, RBP-J kappa (CBF1), MCR, DGK-gamma, ESM-1, Leptin receptor, ARG2, GIPC, Kv10.1, PLA2, AAK1, CLOCK, TrkB, G-protein alpha-t, OTUD7B, CACNA1C, NeuroD2, SFRP, CDGAP, IRF7, BETA-PIX, Mn(III)-Apotransferrin, ATP1A3, SOCS5, AMPK alpha subunit…
17	small molecule metabolic process	2298	3.46071e-27	1.77087e-24	3.46071e-27	1.77087e-24	175	CBSL, AK3L1, QKI, MAGI-3, K(+) channel, subfamily J, RXRA, CYP51A1, SOAT1, APHC, SMVT, KGUA, ELOVL5, Leptin receptor, ARG2, PLA2, BCAT1, PRUNE, SC4MOL, AMPK alpha subunit, LSS, IBP1, MTR, C/EBP, AGXT2L2, XYLT1, SREBP1 precursor, Exostosin-1, KYNU, LPP2, SULT2A1, SGPP1, LIPE, ALDOB, ELOVL6, GLCE, PDE, CRY1, LGSN, ASNS, Sestrin 2, AMPK alpha 2 subunit, FASN, PON3, CYP2J2, ERG1, Glyoxalase II, AACS,…
18	regulation of multicellular organismal process	4748	6.6388e-27	3.20838e-24	6.6388e-27	3.20838e-24	282	Ephrin-A, Plexin A2, WASF subunit, QKI, BHLHB4, KLF7, K(+) channel, subfamily J, RXRA, BIN1 (Amphiphysin II), RhoJ, LRRTM4, CYP51A1, AP-2A, SPRED2, ADAM12, TfR1, CARP, Ataxin-1, APJ, RBP-J kappa (CBF1), DGK-gamma, Leptin receptor, LINGO4, ARG2, PLA2, CLOCK, TrkB, OTUD7B, CACNA1C, NeuroD2, SFRP, IRF7, Mn(III)-Apotransferrin, ATP1A3, SOCS5, PRUNE, AMPK alpha subunit, WNT3A, PHF15, CD137(TNFRSF9), C…
19	cell development	2630	7.79646e-27	3.56955e-24	7.79646e-27	3.56955e-24	190	ITGA4, Ephrin-A, PTHR1, Plexin A2, WASF subunit, QKI, BHLHB4, KLF7, K(+) channel, subfamily J, RXRA, BIN1 (Amphiphysin II), Delta-sarcoglycan, AP-2A, PIP5KII, UNC5B, FHL2, CARP, ADAR2, DGK-gamma, MICAL-L1, PLA2, TrkB, G-protein alpha-t, NeuroD2, SFRP, Transducin, rod-specific, WNT3A, PHF15, MTR, C/EBP, Exostosin-1, Histone deacetylase class II, NDRG1, KCC2, JIP-2, HSP70, KIAA1853, Syntaxin 3, PRT…
20	anatomical structure morphogenesis	3270	8.87662e-27	3.86089e-24	8.87662e-27	3.86089e-24	219	PTPR-beta, ITGA4, Ephrin-A, Plexin A2, WASF subunit, CBSL, QKI, BHLHB4, KLF7, RXRA, RhoJ, Delta-sarcoglycan, AP-2A, UNC5B, ADAM12, FHL2, OPN5, CARP, APJ, RBP-J kappa (CBF1), Angiopoietin-like 2, ADAR2, ESM-1, Leptin receptor, Kv10.1, PLA2, TrkB, G-protein alpha-t, CACNA1C, SFRP, Mesogenin 1, Transducin, rod-specific, WNT3A, PHF15, C/EBP, Exostosin-1, Histone deacetylase class II, JIP-2, HSP70, HE…
21	regulation of cell communication	4929	2.04572e-26	8.47417e-24	2.04572e-26	8.47417e-24	288	Ephrin-A, WASF subunit, CBSL, MAGI-3, KLF7, K(+) channel, subfamily J, RhoJ, AP-2A, PIP5KII, SPRED2, UNC5B, TfR1, NF-AT5, FHL2, DDRGK1, CARP, TfR2, Ataxin-1, APJ, RBP-J kappa (CBF1), MCR, DGK-gamma, ESM-1, Leptin receptor, ARG2, GIPC, Kv10.1, PLA2, AAK1, CLOCK, TrkB, G-protein alpha-t, OTUD7B, CACNA1C, NeuroD2, SFRP, CDGAP, IRF7, BETA-PIX, Mn(III)-Apotransferrin, SOCS5, AMPK alpha subunit, Transd…
22	response to organic cyclic compound	1955	9.84382e-26	3.77565e-23	9.84382e-26	3.77565e-23	155	Ephrin-A, CBSL, K(+) channel, subfamily J, RXRA, G-protein alpha-11, FHL2, CARP, MCR, Leptin receptor, ARG2, PLA2, GABA-A receptor gamma-2 subunit, SFRP, G-protein beta, Mn(III)-Apotransferrin, ATP1A3, Fra-1, AMPK alpha subunit, C/EBP, Galectin-1, SREBP1 precursor, KYNU, Histone deacetylase class II, SULT2A1, HSP70, ALDOB, MUNC18, Caspase-1, PDE, SP5, IGF-1 receptor, SLC22A6, ASNS, AMPK alpha 2 s…
23	response to oxygen-containing compound	2992	9.98275e-26	3.77565e-23	9.98275e-26	3.77565e-23	204	ITGA4, Ephrin-A, CBSL, K(+) channel, subfamily J, RXRA, AP-2A, TfR1, G-protein alpha-11, CARP, KLF11 (TIEG2), Leptin receptor, ARG2, PLA2, TrkB, CACNA1C, SFRP, G-protein beta, Mn(III)-Apotransferrin, ATP1A3, Fra-1, Rab12, AMPK alpha subunit, WNT3A, IBP1, MTR, C/EBP, Galectin-1, SREBP1 precursor, Exostosin-1, Histone deacetylase class II, SULT2A1, HSP70, Thyroglobulin, ALDOB, MUNC18, Caspase-1, He…
24	regulation of transport	2801	3.56019e-25	1.29042e-22	3.56019e-25	1.29042e-22	194	Ephrin-A, KLF7, K(+) channel, subfamily J, BIN1 (Amphiphysin II), CYP51A1, KV1.6, DDRGK1, CARP, TfR2, APJ, MCR, Leptin receptor, IL-2R beta chain, ARG2, GIPC, Kv10.1, PLA2, AAK1, CLOCK, TrkB, CACNA1C, SFRP, G-protein beta, BETA-PIX, Mn(III)-Apotransferrin, Rab12, AMPK alpha subunit, WNT3A, C/EBP, SREBP1 precursor, GluR5, RIMS4, Histone deacetylase class II, JIP-2, HSP70, LIPE, Synaptotagmin II, M…
25	response to extracellular stimulus	1042	1.33732e-24	4.65332e-22	1.33732e-24	4.65332e-22	104	ITGA4, CBSL, AK3L1, RXRA, TfR1, Leptin receptor, ARG2, PLA2, SFRP, Fra-1, AMPK alpha subunit, MTR, C/EBP, SREBP1 precursor, KYNU, SULT2A1, HSP70, LIPE, ALDOB, Heme oxygenase 1, IGF-1 receptor, ASNS, NIM1, Sestrin 2, AES (GRG), AMPK alpha 2 subunit, IL-11 receptor, AACS, DT3UO, Activin B, CRP, ATF-3, VDR, NCX, Galpha(i)-specific peptide GPCRs, HIG1, STAT5, GATA-4, GATA Group, TGF-beta 1, MyHC, Gal…
26	regulation of multicellular organismal development	3202	1.36038e-23	4.55152e-21	1.36038e-23	4.55152e-21	208	Ephrin-A, Plexin A2, WASF subunit, QKI, BHLHB4, KLF7, RXRA, BIN1 (Amphiphysin II), RhoJ, LRRTM4, AP-2A, SPRED2, ADAM12, TfR1, CARP, Ataxin-1, APJ, RBP-J kappa (CBF1), DGK-gamma, LINGO4, PLA2, CLOCK, TrkB, NeuroD2, SFRP, IRF7, Mn(III)-Apotransferrin, SOCS5, PRUNE, AMPK alpha subunit, WNT3A, PHF15, C/EBP, XYLT1, Galectin-1, Histone deacetylase class II, HSP70, SGPP1, Thyroglobulin, PRTG, Synaptotag…
27	response to nutrient levels	988	1.47632e-23	4.75649e-21	1.47632e-23	4.75649e-21	99	CBSL, AK3L1, RXRA, TfR1, Leptin receptor, ARG2, PLA2, SFRP, AMPK alpha subunit, MTR, C/EBP, SREBP1 precursor, KYNU, SULT2A1, HSP70, LIPE, ALDOB, Heme oxygenase 1, IGF-1 receptor, ASNS, NIM1, Sestrin 2, AMPK alpha 2 subunit, IL-11 receptor, AACS, DT3UO, Activin B, CRP, ATF-3, VDR, NCX, Galpha(i)-specific peptide GPCRs, HIG1, STAT5, GATA-4, GATA Group, TGF-beta 1, MyHC, Galpha(q)-specific THRH&S GP…
28	regulation of developmental process	3978	1.64657e-23	5.11553e-21	1.64657e-23	5.11553e-21	241	Ephrin-A, Plexin A2, WASF subunit, QKI, BHLHB4, KLF7, RXRA, BIN1 (Amphiphysin II), RhoJ, LRRTM4, AP-2A, SPRED2, ADAM12, TfR1, G-protein alpha-11, CARP, Ataxin-1, APJ, RBP-J kappa (CBF1), DGK-gamma, LINGO4, ARG2, PLA2, CLOCK, TrkB, CACNA1C, NeuroD2, SFRP, IRF7, G-protein beta, BETA-PIX, Mn(III)-Apotransferrin, SOCS5, PRUNE, AMPK alpha subunit, WNT3A, G-protein beta3/gamma13, PHF15, C/EBP, XYLT1, G…
29	regulation of lipid metabolic process	687	3.32108e-23	9.96208e-21	3.32108e-23	9.96208e-21	80	RXRA, CYP51A1, FHL2, CARP, ELOVL5, PLA2, G-protein beta, SOCS5, AMPK alpha subunit, G-protein beta3/gamma13, LSS, GLIPR, SREBP1 precursor, SULT2A1, CLCN2, ELOVL6, PDE, IGF-1 receptor, AMPK alpha 2 subunit, FASN, CHRM, ERG1, G-protein beta/gamma, c-Kit, VDR, L-FABP, Galpha(i)-specific peptide GPCRs, STAT5, MVK, AIP1 (DAB2ip), TGF-beta 1, Galpha(q)-specific THRH&S GPCRs, Adipophilin, Rho GTPase, TG…
30	cellular response to chemical stimulus	4582	7.33371e-23	2.12653e-20	7.33371e-23	2.12653e-20	264	ITGA4, Ephrin-A, WASF subunit, CBSL, K(+) channel, subfamily J, RXRA, AP-2A, SPRED2, TfR1, G-protein alpha-11, CREB-H, NF-AT5, FHL2, CARP, TfR2, KLF11 (TIEG2), KGUA, RBP-J kappa (CBF1), MCR, Leptin receptor, IL-2R beta chain, MICAL-L1, ARG2, GIPC, Kv10.1, PLA2, TrkB, CACNA1C, NeuroD2, GABA-A receptor gamma-2 subunit, SFRP, IRF7, G-protein beta, Mn(III)-Apotransferrin, ATP1A3, SOCS5, Rab12, AMPK a…
31	neuron differentiation	1661	7.89038e-23	2.21414e-20	7.89038e-23	2.21414e-20	134	ITGA4, Ephrin-A, Plexin A2, WASF subunit, BHLHB4, KLF7, RXRA, AP-2A, UNC5B, RBP-J kappa (CBF1), ADAR2, DGK-gamma, MICAL-L1, PLA2, TrkB, G-protein alpha-t, NeuroD2, SFRP, Transducin, rod-specific, WNT3A, PHF15, MTR, C/EBP, Exostosin-1, Histone deacetylase class II, KCC2, JIP-2, HSP70, KIAA1853, Syntaxin 3, PRTG, MUNC18, Cadherin 23, TAO2, PDE, IGF-1 receptor, PBX1, HIPK2, CACNA1 L-type, UGT8, ZIC2…
32	cellular response to organic substance	3766	9.55142e-23	2.59649e-20	9.55142e-23	2.59649e-20	230	ITGA4, Ephrin-A, WASF subunit, K(+) channel, subfamily J, RXRA, SPRED2, TfR1, G-protein alpha-11, CREB-H, NF-AT5, FHL2, CARP, KLF11 (TIEG2), MCR, Leptin receptor, IL-2R beta chain, MICAL-L1, ARG2, GIPC, PLA2, TrkB, CACNA1C, GABA-A receptor gamma-2 subunit, SFRP, IRF7, G-protein beta, Mn(III)-Apotransferrin, ATP1A3, SOCS5, Rab12, AMPK alpha subunit, WNT3A, CD137(TNFRSF9), IBP1, MTR, C/EBP, Galecti…
33	carboxylic acid transport	425	1.59428e-22	4.20263e-20	1.59428e-22	4.20263e-20	61	K(+) channel, subfamily J, RXRA, SLC25A22, SMVT, PLA2G12, GIPC, PLA2, TrkB, SLC7A6, AMPK alpha subunit, ASCT1 (SLC1A4), MUNC18, Synaptotagmin, SLC22A6, AMPK alpha 2 subunit, L-FABP, SLC6A15, Galpha(i)-specific peptide GPCRs, P/Q-type calcium channel alpha-1A subunit, CAT-1 (SLC7A1), SLC19A2, SLC25A38, Adipophilin, NaDC-1, PPAR-alpha/RXR-alpha, SLC7A5, BSEP, ACACA, ACE2, Galpha(i)-specific amine G…
34	response to endogenous stimulus	2617	1.79624e-22	4.59574e-20	1.79624e-22	4.59574e-20	179	ITGA4, Ephrin-A, WASF subunit, K(+) channel, subfamily J, RXRA, SPRED2, G-protein alpha-11, FHL2, CARP, KLF11 (TIEG2), MCR, Leptin receptor, MXRA5, MICAL-L1, ARG2, PLA2, TrkB, CACNA1C, GABA-A receptor gamma-2 subunit, SFRP, G-protein beta, Mn(III)-Apotransferrin, ATP1A3, Fra-1, SOCS5, Rab12, AMPK alpha subunit, WNT3A, IBP1, MTR, C/EBP, SREBP1 precursor, Exostosin-1, Histone deacetylase class II, …
35	organic acid transport	428	2.31008e-22	5.74154e-20	2.31008e-22	5.74154e-20	61	K(+) channel, subfamily J, RXRA, SLC25A22, SMVT, PLA2G12, GIPC, PLA2, TrkB, SLC7A6, AMPK alpha subunit, ASCT1 (SLC1A4), MUNC18, Synaptotagmin, SLC22A6, AMPK alpha 2 subunit, L-FABP, SLC6A15, Galpha(i)-specific peptide GPCRs, P/Q-type calcium channel alpha-1A subunit, CAT-1 (SLC7A1), SLC19A2, SLC25A38, Adipophilin, NaDC-1, PPAR-alpha/RXR-alpha, SLC7A5, BSEP, ACACA, ACE2, Galpha(i)-specific amine G…
36	sensory system development	684	4.47226e-22	1.08067e-19	4.47226e-22	1.08067e-19	78	BHLHB4, RXRA, RhoJ, AP-2A, OPN5, Connexin 50, TrkB, G-protein alpha-t, CACNA1C, G-protein beta, Transducin, rod-specific, HESX1, CLCN2, PDE, PBX1, HIPK2, CACNA1 L-type, Activin B, NR2E3, G-protein beta/gamma, WNT9A, DSCAM, Semaphorin 3A, GATA Group, TGF-beta 1, AP-2, COL8A2, MyHC, Rho GTPase, G-protein gamma, TCF8, TGF-beta, ROM1, RDH13, KYIP1, PPAR-alpha/RXR-alpha, RS1, Beta crystallin B1, SIPA1…
37	eye development	669	4.75016e-22	1.1168e-19	4.75016e-22	1.1168e-19	77	BHLHB4, RXRA, RhoJ, AP-2A, OPN5, Connexin 50, TrkB, G-protein alpha-t, CACNA1C, G-protein beta, Transducin, rod-specific, HESX1, CLCN2, PDE, PBX1, HIPK2, CACNA1 L-type, Activin B, NR2E3, G-protein beta/gamma, WNT9A, DSCAM, GATA Group, TGF-beta 1, AP-2, COL8A2, MyHC, Rho GTPase, G-protein gamma, TCF8, TGF-beta, ROM1, RDH13, KYIP1, PPAR-alpha/RXR-alpha, RS1, Beta crystallin B1, SIPA1L3, WNT, RARgam…
38	negative regulation of cellular process	6985	8.90682e-22	2.03896e-19	8.90682e-22	2.03896e-19	353	SEC22B, PTPR-beta, Ephrin-A, PTHR1, Plexin A2, WASF subunit, CBSL, QKI, BHLHB4, KLF7, K(+) channel, subfamily J, RXRA, BIN1 (Amphiphysin II), CYP51A1, AP-2A, SPRED2, UNC5B, GCNF, TfR1, FHL2, DDRGK1, CARP, KLF11 (TIEG2), Ataxin-1, APJ, RBP-J kappa (CBF1), ADAR2, DGK-gamma, Leptin receptor, IL-2R beta chain, ARG2, GIPC, PLA2, CLOCK, TrkB, PPP1R14C, OTUD7B, NeuroD2, SFRP, IRF7, G-protein beta, BETA-…
39	visual system development	677	9.84846e-22	2.19671e-19	9.84846e-22	2.19671e-19	77	BHLHB4, RXRA, RhoJ, AP-2A, OPN5, Connexin 50, TrkB, G-protein alpha-t, CACNA1C, G-protein beta, Transducin, rod-specific, HESX1, CLCN2, PDE, PBX1, HIPK2, CACNA1 L-type, Activin B, NR2E3, G-protein beta/gamma, WNT9A, DSCAM, GATA Group, TGF-beta 1, AP-2, COL8A2, MyHC, Rho GTPase, G-protein gamma, TCF8, TGF-beta, ROM1, RDH13, KYIP1, PPAR-alpha/RXR-alpha, RS1, Beta crystallin B1, SIPA1L3, WNT, RARgam…
40	organic anion transport	647	1.10543e-21	2.40403e-19	1.10543e-21	2.40403e-19	75	K(+) channel, subfamily J, RXRA, SLC25A22, SMVT, PLA2G12, GIPC, PLA2, TrkB, SLC7A6, AMPK alpha subunit, ASCT1 (SLC1A4), SLC25A43, MUNC18, Synaptotagmin, SLC22A6, GLTPD2, AMPK alpha 2 subunit, ORP-family, L-FABP, SLC6A15, Galpha(i)-specific peptide GPCRs, P/Q-type calcium channel alpha-1A subunit, CAT-1 (SLC7A1), SLC19A2, SLC25A38, Adipophilin, NaDC-1, LDLR, PPAR-alpha/RXR-alpha, SLC7A5, BSEP, ACA…
41	response to external stimulus	4087	1.51666e-21	3.21791e-19	1.51666e-21	3.21791e-19	240	ITGA4, Ephrin-A, Plexin A2, CBSL, AK3L1, KLF7, K(+) channel, subfamily J, RXRA, AP-2A, UNC5B, TfR1, G-protein alpha-11, OPN5, CARP, RBP-J kappa (CBF1), ADAR2, Leptin receptor, ARG2, Kv10.1, PLA2, FKBP5, CLOCK, TrkB, G-protein alpha-t, SFRP, IRF7, G-protein beta, Mn(III)-Apotransferrin, Fra-1, Rab12, AMPK alpha subunit, Transducin, rod-specific, WNT3A, MTR, C/EBP, S-arrestin, SREBP1 precursor, BAT…
42	response to organic substance	4930	1.55652e-21	3.22384e-19	1.55652e-21	3.22384e-19	274	ITGA4, Ephrin-A, WASF subunit, CBSL, K(+) channel, subfamily J, RXRA, AP-2A, SPRED2, TfR1, G-protein alpha-11, CREB-H, NF-AT5, FHL2, CARP, KLF11 (TIEG2), MCR, Leptin receptor, IL-2R beta chain, MXRA5, MICAL-L1, ARG2, GIPC, PLA2, TrkB, CACNA1C, GABA-A receptor gamma-2 subunit, SFRP, IRF7, G-protein beta, Mn(III)-Apotransferrin, ATP1A3, Fra-1, SOCS5, Rab12, AMPK alpha subunit, WNT3A, CD137(TNFRSF9)…
43	cellular response to endogenous stimulus	2088	1.68549e-21	3.40978e-19	1.68549e-21	3.40978e-19	152	ITGA4, Ephrin-A, WASF subunit, K(+) channel, subfamily J, RXRA, SPRED2, G-protein alpha-11, FHL2, CARP, KLF11 (TIEG2), MCR, Leptin receptor, MICAL-L1, ARG2, PLA2, TrkB, CACNA1C, GABA-A receptor gamma-2 subunit, SFRP, G-protein beta, Mn(III)-Apotransferrin, ATP1A3, Rab12, AMPK alpha subunit, WNT3A, IBP1, MTR, C/EBP, SREBP1 precursor, Exostosin-1, Histone deacetylase class II, HSP70, FRS2beta, ALDO…
44	response to lipid	1829	2.72464e-21	5.38673e-19	2.72464e-21	5.38673e-19	139	Ephrin-A, K(+) channel, subfamily J, RXRA, AP-2A, TfR1, FHL2, CARP, MCR, Leptin receptor, ARG2, PLA2, SFRP, G-protein beta, ATP1A3, Fra-1, AMPK alpha subunit, WNT3A, C/EBP, SREBP1 precursor, Histone deacetylase class II, SULT2A1, HSP70, Thyroglobulin, ALDOB, MUNC18, Caspase-1, PDE, IGF-1 receptor, AMPK alpha 2 subunit, CACNA1 L-type, Aquaporin 4, AACS, ORP-family, Activin B, CRP, Ephrin-A5, NR2E3…
45	cellular response to oxygen-containing compound	2028	5.11191e-21	9.8819e-19	5.11191e-21	9.8819e-19	148	ITGA4, Ephrin-A, K(+) channel, subfamily J, RXRA, G-protein alpha-11, CARP, KLF11 (TIEG2), ARG2, PLA2, TrkB, CACNA1C, SFRP, G-protein beta, Mn(III)-Apotransferrin, ATP1A3, Rab12, AMPK alpha subunit, WNT3A, IBP1, MTR, C/EBP, Galectin-1, SREBP1 precursor, Histone deacetylase class II, SULT2A1, HSP70, ALDOB, Caspase-1, PDE, IGF-1 receptor, Sestrin 2, AMPK alpha 2 subunit, Beta-2 transferrin, CACNA1 …
46	positive regulation of cellular process	7836	6.31882e-21	1.19494e-18	6.31882e-21	1.19494e-18	381	ITGA4, Ephrin-A, PTHR1, Plexin A2, WASF subunit, QKI, BHLHB4, MAGI-3, KLF7, K(+) channel, subfamily J, RXRA, BIN1 (Amphiphysin II), RhoJ, LRRTM4, AP-2A, PIP5KII, SPRED2, UNC5B, SOAT1, GCNF, TfR1, CREB-H, NF-AT5, FHL2, APHC, DDRGK1, CARP, TfR2, KLF11 (TIEG2), Ataxin-1, TRH receptor, APJ, RBP-J kappa (CBF1), MCR, ELOVL5, ADAR2, ESM-1, Leptin receptor, IL-2R beta chain, LINGO4, ARG2, GIPC, PLA2, AAK…
47	anion transport	814	7.02674e-21	1.30054e-18	7.02674e-21	1.30054e-18	84	K(+) channel, subfamily J, RXRA, SLC25A22, SMVT, PLA2G12, GIPC, PLA2, TrkB, GABA-A receptor gamma-2 subunit, SLC7A6, AMPK alpha subunit, ASCT1 (SLC1A4), KCC2, Thyroglobulin, SLC25A43, MUNC18, CLCN2, Synaptotagmin, SLC22A6, GLTPD2, AMPK alpha 2 subunit, ORP-family, L-FABP, SLC6A15, Galpha(i)-specific peptide GPCRs, P/Q-type calcium channel alpha-1A subunit, CAT-1 (SLC7A1), SLC19A2, SLC25A38, Adipo…
48	regulation of nervous system development	1510	8.09372e-21	1.45574e-18	8.09372e-21	1.45574e-18	122	Ephrin-A, Plexin A2, WASF subunit, QKI, RXRA, BIN1 (Amphiphysin II), LRRTM4, AP-2A, CARP, Ataxin-1, RBP-J kappa (CBF1), DGK-gamma, LINGO4, PLA2, TrkB, NeuroD2, SFRP, Mn(III)-Apotransferrin, PRUNE, WNT3A, PHF15, XYLT1, Galectin-1, Histone deacetylase class II, HSP70, Thyroglobulin, PRTG, Synaptotagmin II, WASF3 (WAVE3), Synaptotagmin, ATP1B2, IGF-1 receptor, PBX1, Beta-2 transferrin, Girdin, DAAM2…
49	regulation of secretion	1261	8.19991e-21	1.45574e-18	8.19991e-21	1.45574e-18	109	Ephrin-A, KLF7, K(+) channel, subfamily J, CYP51A1, DDRGK1, CARP, TfR2, MCR, Leptin receptor, ARG2, GIPC, Kv10.1, PLA2, CLOCK, TrkB, CACNA1C, SFRP, BETA-PIX, Rab12, AMPK alpha subunit, SREBP1 precursor, GluR5, RIMS4, Histone deacetylase class II, Synaptotagmin II, MUNC18, Caspase-1, Synaptotagmin, CACNA1E, Heme oxygenase 1, PDE, CRY1, CACNA1 L-type, CYP2J2, CHRM, IL-11 receptor, AACS, Activin B, …
50	ion transmembrane transport	1245	9.67578e-21	1.68339e-18	9.67578e-21	1.68339e-18	108	K(+) channel, subfamily J, SLC25A22, KV1.6, SMVT, TfR2, Kv10.1, SLC41A2, CACNA1C, GABA-A receptor gamma-2 subunit, SLC7A6, Mn(III)-Apotransferrin, ATP1A3, AMPK alpha subunit, WNT3A, SLC6A16, ASCT1 (SLC1A4), GluR5, KCC2, SLC25A37, CLCN2, CACNA1E, Kir1.1, ATP1B2, KIAA1843, SLC22A6, Lrrc38, AMPK alpha 2 subunit, Beta-2 transferrin, CACNA1 L-type, Kir3.4, GluR7, DT3UO, KCNH2, NCX, SLC6A15, Galpha(i)-…

## Sheet: Table S3.9-mRNA-GO-TPP
Enrichment by GO Processes					TPP-Con_log2(1.5)all_FRC_RNA
#	Processes	Total	pValue	Min FDR	p-value	FDR	In Data	Network Objects from Active Data
1	regulation of multicellular organismal development	3202	8.94542e-07	0.00216479	8.94542e-07	0.00216479	17	TFE3, DGK, DGK-gamma, MA2A1, SFRP2, SVCT2, gp130, PSMA6, Galectin-1, Semaphorin 6B, SFRP, ATF/CREB, eIF2C2 (Argonaute-2), VDR, HIPK2, Galpha(q)-specific THRH&S GPCRs, Itch
2	negative regulation of dermatome development	2	2.16493e-06	0.00237471	2.16493e-06	0.00237471	2	SFRP2, SFRP
3	monosaccharide metabolic process	289	4.07494e-06	0.00237471	4.07494e-06	0.00237471	6	UGT1A4, MA2A1, SVCT2, ATF/CREB, UGT, ALDOB
4	response to nutrient	457	4.39297e-06	0.00237471	4.39297e-06	0.00237471	7	SFRP2, SOAT2, gp130, SFRP, ATF/CREB, UGT, VDR
5	bilirubin conjugation	3	6.48867e-06	0.00237471	6.48867e-06	0.00237471	2	UGT1A4, UGT
6	regulation of nervous system development	1510	8.04277e-06	0.00237471	8.04277e-06	0.00237471	11	DGK, DGK-gamma, MA2A1, SFRP2, SVCT2, gp130, Galectin-1, Semaphorin 6B, SFRP, ATF/CREB, Galpha(q)-specific THRH&S GPCRs
7	system development	6754	9.02123e-06	0.00237471	9.02123e-06	0.00237471	23	UGT1A4, DGK, DGK-gamma, MA2A1, SFRP2, SVCT2, gp130, Telethonin, PSMA6, Galectin-1, CMYA3, Semaphorin 6B, SFRP, CREB5, MMP-24, GPR116, ATF/CREB, UGT, VDR, HIPK2, Galpha(q)-specific THRH&S GPCRs, ALDOB, DHRS3
8	regulation of multicellular organismal process	4748	1.08967e-05	0.00237471	1.08967e-05	0.00237471	19	TFE3, LGALS9C, DGK, DGK-gamma, MA2A1, SFRP2, SVCT2, gp130, PSMA6, Galectin-1, Semaphorin 6B, SFRP, ATF/CREB, eIF2C2 (Argonaute-2), VDR, HIPK2, Galpha(q)-specific THRH&S GPCRs, Itch, DHRS3
9	response to nutrient levels	988	1.10594e-05	0.00237471	1.10594e-05	0.00237471	9	SFRP2, SOAT2, gp130, SFRP, ATF/CREB, UGT, VDR, Galpha(q)-specific THRH&S GPCRs, ALDOB
10	positive regulation of fat cell differentiation	95	1.21015e-05	0.00237471	1.21015e-05	0.00237471	4	TFE3, SFRP2, SFRP, ATF/CREB
11	positive regulation of developmental process	2258	1.25087e-05	0.00237471	1.25087e-05	0.00237471	13	TFE3, MA2A1, SFRP2, SVCT2, gp130, Galectin-1, SFRP, ATF/CREB, eIF2C2 (Argonaute-2), VDR, HIPK2, Galpha(q)-specific THRH&S GPCRs, Itch
12	negative regulation of planar cell polarity pathway involved in axis elongation	4	1.29651e-05	0.00237471	1.29651e-05	0.00237471	2	SFRP2, SFRP
13	regulation of planar cell polarity pathway involved in axis elongation	4	1.29651e-05	0.00237471	1.29651e-05	0.00237471	2	SFRP2, SFRP
14	negative regulation of cellular process	6985	1.65498e-05	0.00237471	1.65498e-05	0.00237471	23	UGT1A4, LGALS9C, DGK, DGK-gamma, SFRP2, SVCT2, gp130, PSMA6, Galectin-1, SRGAP2(WRP), Semaphorin 6B, FAM130A2, SFRP, GPR116, ATF/CREB, UGT, eIF2C2 (Argonaute-2), VDR, P52rIPK, HIPK2, Galpha(q)-specific THRH&S GPCRs, Itch, DHRS3
15	response to extracellular stimulus	1042	1.69079e-05	0.00237471	1.69079e-05	0.00237471	9	SFRP2, SOAT2, gp130, SFRP, ATF/CREB, UGT, VDR, Galpha(q)-specific THRH&S GPCRs, ALDOB
16	multicellular organism development	7593	1.78802e-05	0.00237471	1.78802e-05	0.00237471	24	UGT1A4, DGK, DGK-gamma, MA2A1, SFRP2, SVCT2, gp130, Telethonin, PSMA6, Galectin-1, CMYA3, Semaphorin 6B, SFRP, CREB5, MMP-24, GPR116, ATF/CREB, UGT, eIF2C2 (Argonaute-2), VDR, HIPK2, Galpha(q)-specific THRH&S GPCRs, ALDOB, DHRS3
17	regulation of developmental process	3978	1.83481e-05	0.00237471	1.83481e-05	0.00237471	17	TFE3, DGK, DGK-gamma, MA2A1, SFRP2, SVCT2, gp130, PSMA6, Galectin-1, Semaphorin 6B, SFRP, ATF/CREB, eIF2C2 (Argonaute-2), VDR, HIPK2, Galpha(q)-specific THRH&S GPCRs, Itch
18	regulation of neurogenesis	1343	1.90228e-05	0.00237471	1.90228e-05	0.00237471	10	DGK, DGK-gamma, MA2A1, SFRP2, SVCT2, gp130, Galectin-1, Semaphorin 6B, SFRP, ATF/CREB
19	negative regulation of biological process	7670	2.15841e-05	0.00237471	2.15841e-05	0.00237471	24	TFE3, UGT1A4, LGALS9C, DGK, DGK-gamma, SFRP2, SVCT2, gp130, PSMA6, Galectin-1, SRGAP2(WRP), Semaphorin 6B, FAM130A2, SFRP, GPR116, ATF/CREB, UGT, eIF2C2 (Argonaute-2), VDR, P52rIPK, HIPK2, Galpha(q)-specific THRH&S GPCRs, Itch, DHRS3
20	negative regulation of mesoderm formation	5	2.15882e-05	0.00237471	2.15882e-05	0.00237471	2	SFRP2, SFRP
21	negative regulation of mesodermal cell differentiation	5	2.15882e-05	0.00237471	2.15882e-05	0.00237471	2	SFRP2, SFRP
22	negative regulation of mesodermal cell fate specification	5	2.15882e-05	0.00237471	2.15882e-05	0.00237471	2	SFRP2, SFRP
23	heart morphogenesis	409	2.92189e-05	0.00296693	2.92189e-05	0.00296693	6	SFRP2, Telethonin, CMYA3, SFRP, ATF/CREB, DHRS3
24	outflow tract morphogenesis	119	2.94241e-05	0.00296693	2.94241e-05	0.00296693	4	SFRP2, SFRP, ATF/CREB, DHRS3
25	regulation of dermatome development	6	3.23519e-05	0.00312203	3.23519e-05	0.00312203	2	SFRP2, SFRP
26	regulation of neuron projection development	866	3.35424e-05	0.00312203	3.35424e-05	0.00312203	8	DGK, DGK-gamma, SFRP2, SVCT2, Galectin-1, Semaphorin 6B, SFRP, ATF/CREB
27	regulation of plasma membrane bounded cell projection organization	1144	3.53315e-05	0.00316675	3.53315e-05	0.00316675	9	DGK, DGK-gamma, SFRP2, TBC1D9B, SVCT2, Galectin-1, Semaphorin 6B, SFRP, ATF/CREB
28	regulation of cell differentiation	2891	3.69158e-05	0.00317771	3.69158e-05	0.00317771	14	TFE3, DGK, DGK-gamma, MA2A1, SFRP2, SVCT2, gp130, PSMA6, Galectin-1, Semaphorin 6B, SFRP, ATF/CREB, VDR, Itch
29	regulation of cell projection organization	1155	3.808e-05	0.00317771	3.808e-05	0.00317771	9	DGK, DGK-gamma, SFRP2, TBC1D9B, SVCT2, Galectin-1, Semaphorin 6B, SFRP, ATF/CREB
30	carbohydrate metabolic process	655	4.47867e-05	0.00342204	4.47867e-05	0.00342204	7	UGT1A4, MA2A1, SVCT2, gp130, ATF/CREB, UGT, ALDOB
31	negative regulation of protein kinase C signaling	7	4.52501e-05	0.00342204	4.52501e-05	0.00342204	2	DGK, DGK-gamma
32	sclerotome development	7	4.52501e-05	0.00342204	4.52501e-05	0.00342204	2	SFRP2, SFRP
33	developmental process	8706	5.76957e-05	0.00353376	5.76957e-05	0.00353376	25	UGT1A4, DGK, DGK-gamma, MA2A1, SFRP2, SVCT2, SOAT2, gp130, Telethonin, PSMA6, Galectin-1, CMYA3, Semaphorin 6B, SFRP, CREB5, MMP-24, GPR116, ATF/CREB, UGT, eIF2C2 (Argonaute-2), VDR, HIPK2, Galpha(q)-specific THRH&S GPCRs, ALDOB, DHRS3
34	positive regulation of angiogenesis	281	5.83241e-05	0.00353376	5.83241e-05	0.00353376	5	SFRP2, SFRP, eIF2C2 (Argonaute-2), HIPK2, Galpha(q)-specific THRH&S GPCRs
35	anatomical structure development	8098	5.86456e-05	0.00353376	5.86456e-05	0.00353376	24	UGT1A4, DGK, DGK-gamma, MA2A1, SFRP2, SVCT2, gp130, Telethonin, PSMA6, Galectin-1, CMYA3, Semaphorin 6B, SFRP, CREB5, MMP-24, GPR116, ATF/CREB, UGT, eIF2C2 (Argonaute-2), VDR, HIPK2, Galpha(q)-specific THRH&S GPCRs, ALDOB, DHRS3
36	porphyrin-containing compound catabolic process	8	6.02767e-05	0.00353376	6.02767e-05	0.00353376	2	UGT1A4, UGT
37	Wnt signaling pathway involved in somitogenesis	8	6.02767e-05	0.00353376	6.02767e-05	0.00353376	2	SFRP2, SFRP
38	pigment catabolic process	8	6.02767e-05	0.00353376	6.02767e-05	0.00353376	2	UGT1A4, UGT
39	regulation of midbrain dopaminergic neuron differentiation	8	6.02767e-05	0.00353376	6.02767e-05	0.00353376	2	SFRP2, SFRP
40	heme catabolic process	8	6.02767e-05	0.00353376	6.02767e-05	0.00353376	2	UGT1A4, UGT
41	regulation of lipid metabolic process	687	6.05227e-05	0.00353376	6.05227e-05	0.00353376	7	UGT1A4, DGK, GPR116, ATF/CREB, UGT, VDR, Galpha(q)-specific THRH&S GPCRs
42	regulation of cellular ketone metabolic process	284	6.13297e-05	0.00353376	6.13297e-05	0.00353376	5	UGT1A4, DGK, PSMA6, UGT, Galpha(q)-specific THRH&S GPCRs
43	negative regulation of JNK cascade	53	6.79811e-05	0.00367393	6.79811e-05	0.00367393	3	SFRP2, SFRP, Itch
44	regulation of angiogenesis	484	7.44372e-05	0.00367393	7.44372e-05	0.00367393	6	SFRP2, SFRP, ATF/CREB, eIF2C2 (Argonaute-2), HIPK2, Galpha(q)-specific THRH&S GPCRs
45	regulation of cell development	1579	7.5653e-05	0.00367393	7.5653e-05	0.00367393	10	DGK, DGK-gamma, MA2A1, SFRP2, SVCT2, gp130, Galectin-1, Semaphorin 6B, SFRP, ATF/CREB
46	tetrapyrrole catabolic process	9	7.74257e-05	0.00367393	7.74257e-05	0.00367393	2	UGT1A4, UGT
47	regulation of glucuronosyltransferase activity	9	7.74257e-05	0.00367393	7.74257e-05	0.00367393	2	UGT1A4, UGT
48	negative regulation of glucuronosyltransferase activity	9	7.74257e-05	0.00367393	7.74257e-05	0.00367393	2	UGT1A4, UGT
49	negative regulation of cellular glucuronidation	9	7.74257e-05	0.00367393	7.74257e-05	0.00367393	2	UGT1A4, UGT
50	regulation of mesodermal cell fate specification	9	7.74257e-05	0.00367393	7.74257e-05	0.00367393	2	SFRP2, SFRP

## Sheet: Table S3.10-mRNA-GO final
	BDE-47	TDBPP	TBBPA	TBBPA_DBPE	TBPH	TCEP	TCPP	IPP	TiBP	TPP
nervous system development/neurogenesis	2.613e-19	8.115e-61		2.622e-11		1.115e-11		8.911e-16	1.196e-32	0.002375
multicellular organism development	9.841e-15	4.386e-61		1.283e-10		1.114e-10		8.911e-16	1.476e-42	0.002375
protein targeting to ER			2.483e-41
viral transcription			5.431e-41
translational initiation			9.472e-39
response to extracellular/external stimulus			6.198e-14					1.6e-17	2.127e-20	0.002375
response to nutrient levels			1.967e-24						4.756e-21	0.002375
ion homeostasis
organic cyclic compound response/metabolism								1.844e-23	3.776e-23
response to oxygen-containing compound								2.839e-23	3.776e-23
response to abiotic stimulus		7.13e-28						2.672e-22	5.744e-28
response to lipid								2.024e-21	9.962e-21	0.003534
response to corticosteroid								1.756e-18
nitrogen compound response/metabolism	9.024e-09		1.193e-25					4.669e-18
regulation of localization									1.052e-25
small molecule metabolic process									1.771e-24	0.003534
mesoderm regulation				1.277e-05						0.002375
positive regulation of fat cell differentiation										0.002375
regulation of transcription				1.033e-07		6.396e-07
phosphorous metabolism				1.188e-05
nervous system development/neurogenesis	18.5829	60.0907	#NUM!	10.5814	#NUM!	10.9527	#NUM!	15.0501	31.9223	2.62434
multicellular organism development	14.007	60.3579	#NUM!	9.89177	#NUM!	9.95311	#NUM!	15.0501	41.8309	2.62434
protein targeting to ER	#NUM!	#NUM!	40.605	#NUM!	#NUM!	#NUM!	#NUM!	#NUM!	#NUM!	#NUM!
viral transcription	#NUM!	#NUM!	40.2651	#NUM!	#NUM!	#NUM!	#NUM!	#NUM!	#NUM!	#NUM!
translational initiation	#NUM!	#NUM!	38.0236	#NUM!	#NUM!	#NUM!	#NUM!	#NUM!	#NUM!	#NUM!
response to extracellular/external stimulus	#NUM!	#NUM!	13.2077	#NUM!	#NUM!	#NUM!	#NUM!	16.7959	19.6722	2.62434
response to nutrient levels	#NUM!	#NUM!	23.7062	#NUM!	#NUM!	#NUM!	#NUM!	#NUM!	20.3228	2.62434
ion homeostasis	#NUM!	#NUM!	#NUM!	#NUM!	#NUM!	#NUM!	#NUM!	#NUM!	#NUM!	#NUM!
organic cyclic compound response/metabolism	#NUM!	#NUM!	#NUM!	#NUM!	#NUM!	#NUM!	#NUM!	22.7342	22.423	#NUM!
response to oxygen-containing compound	#NUM!	#NUM!	#NUM!	#NUM!	#NUM!	#NUM!	#NUM!	22.5468	22.423	#NUM!
response to abiotic stimulus	#NUM!	27.1469	#NUM!	#NUM!	#NUM!	#NUM!	#NUM!	21.5732	27.2408	#NUM!
response to lipid	#NUM!	#NUM!	#NUM!	#NUM!	#NUM!	#NUM!	#NUM!	20.6938	20.0017	2.45173
response to corticosteroid	#NUM!	#NUM!	#NUM!	#NUM!	#NUM!	#NUM!	#NUM!	17.7555	#NUM!	#NUM!
nitrogen compound response/metabolism	8.0446	#NUM!	24.9234	#NUM!	#NUM!	#NUM!	#NUM!	17.3308	#NUM!	#NUM!
regulation of localization	#NUM!	#NUM!	#NUM!	#NUM!	#NUM!	#NUM!	#NUM!	#NUM!	24.978	#NUM!
small molecule metabolic process	#NUM!	#NUM!	#NUM!	#NUM!	#NUM!	#NUM!	#NUM!	#NUM!	23.7518	2.45173
mesoderm regulation	#NUM!	#NUM!	#NUM!	4.89381	#NUM!	#NUM!	#NUM!	#NUM!	#NUM!	2.62434
positive regulation of fat cell differentiation	#NUM!	#NUM!	#NUM!	#NUM!	#NUM!	#NUM!	#NUM!	#NUM!	#NUM!	2.62434
regulation of transcription	#NUM!	#NUM!	#NUM!	6.9859	#NUM!	6.19409	#NUM!	#NUM!	#NUM!	#NUM!
phosphorous metabolism	#NUM!	#NUM!	#NUM!	4.92518	#NUM!	#NUM!	#NUM!	#NUM!	#NUM!	#NUM!

[truncated: 1 more sheets: Table S3.11- miR target GO]
